# Supplementary material for: CCC pincer Ru complex-catalyzed C–H vinylation/6π-E-cyclization of aldimines for constructing 4 H -pyrido[1,2- a ]pyrimidines
Source: Royal Society of Chemistry journal article supplement (doi:10.1039/d4sc05067c), 2024-01-01

# Supporting Information

## CCC Pincer Ru Complex-Catalyzed C-H Vinylation/ $6\pi$ -E-Cyclization of Aldimines for Constructing 4*H*-Pyrido[1,2-*a*]pyrimidines

Heng Cai,<sup>a</sup> Yong-Qiang Tu,<sup>\*a,b</sup> Qiang Niu,<sup>c</sup> Wen-Ping Xie,<sup>b</sup> Bin Wang,<sup>a</sup> Ka Lu,<sup>a</sup> Zi-Hao Li,<sup>b</sup> Fu-Min Zhang,<sup>a</sup> Xiao-Ming Zhang<sup>a</sup>

<sup>a</sup> State Key Lab of Applied Organic Chemistry and College of Chemistry and Chemical Engineering, Lanzhou University, Lanzhou 730000, China.

<sup>b</sup> School of Chemistry and Chemical Engineering, Frontiers Science Center for Transformative Molecules, Shanghai Jiao Tong University, Shanghai 200240, China.

<sup>c</sup> National enterprise technology center, Inner Mongolia Erdos Electric Power and Metallurgy Group Co., Ltd., Ordos, 016064, Inner Mongolia, China.

E-mail: tuyq@lzu.edu.cn; tuyq@sjtu.edu.cn

## Table of Contents

|                                                                                       |           |
|---------------------------------------------------------------------------------------|-----------|
| <b>1. General information .....</b>                                                   | <b>3</b>  |
| <b>2. Preparation of substrates .....</b>                                             | <b>3</b>  |
| 2.1. Preparation and identification of aldimines .....                                | 3         |
| 2.2 Preparation and identification of vinyl bromides .....                            | 13        |
| 2.3 Preparation and identification of vinyl triflates .....                           | 15        |
| <b>3. Experimental procedures .....</b>                                               | <b>16</b> |
| 3.1 Screening of reaction conditions .....                                            | 16        |
| 3.2 Substrate expansion and product identification.....                               | 18        |
| <b>4. Mechanistic studies .....</b>                                                   | <b>38</b> |
| <b>5. In Situ HRMS experiments .....</b>                                              | <b>41</b> |
| <b>6. DFT calculations .....</b>                                                      | <b>46</b> |
| <b>7. X-ray structural characterization of 3ar, 3au, 3bb, 3bc, 3bf, and 3bm .....</b> | <b>90</b> |
| <b>8. References .....</b>                                                            | <b>96</b> |
| <b>9. Copies of NMR spectra.....</b>                                                  | <b>96</b> |

## 1. General information

All the Ru-catalyzed C-H vinylation/ $6\pi$ -electrocyclization of aldimines reactions were carried out using oven-dried (120 °C) schlenk tubes or bottles equipped with a magnetic stir bar in a glove box under argon atmosphere ( $\text{H}_2\text{O} < 0.5$  ppm,  $\text{O}_2 < 0.5$  ppm). 4Å molecular sieve powder was dried in a vacuum oven at 200 °C overnight. Unless noted otherwise, all commercial reagents and solvents were used without additional purification. Toluene and tetrahydrofuran (THF) were dried over sodium. Analytical TLC was performed on silica gel plates with F254 indicator. Visualization was accomplished with ultraviolet light (254 nm). Products purifications were conducted with column chromatography on 200-300 mesh silica gel unless specially stated.

$^1\text{H}$ ,  $^{13}\text{C}$  and  $^{19}\text{F}$  NMR spectra were recorded on Bruker AM-400 MHz or Bruker AM-600 MHz spectrometers. Chemical shifts ( $\delta$ ) were reported in ppm relative to residual solvent peak or tetramethylsilane as internal standard ( $\text{CDCl}_3$ :  $\delta_{\text{H}}$  7.26 ppm and  $\delta_{\text{C}}$  77.00 ppm). The following abbreviations were used to describe peak splitting patterns when appropriate: s = singlet, d = doublet, t = triplet, q = quartet, dd = doublet of doublet, td = triplet of doublet, ddd = doublet of doublet of doublet, m = multiplet. Coupling constants, J, were reported in hertz unit (Hz). High-resolution mass spectral analysis (HRMS) data were collected on the Bruker Apex<sup>II</sup> or Agilent 1290×1290-6560 Ion Mobility QTOF-MS with ESI resource. The FT-IR spectra were recorded on Nicolet Nexus 670 FT-IR spectrometer using neat thin film technique with potassium bromide (KBr) salt plates. The X-ray single-crystal data were recorded on Bruker APEX<sup>II</sup> X-ray single crystal diffractometer.

## 2. Preparation of substrates

Substrates **1**, **2** and **4** were prepared according to the following procedures.

### 2.1. Preparation and identification of aldimines

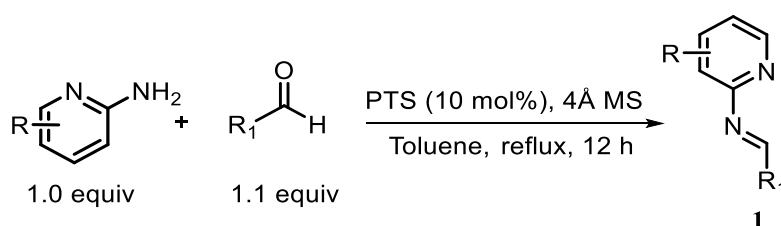

The aldimines used in this study were prepared from the corresponding aldehydes and 2-amino-3-picoline according to the literature procedure.<sup>[1-4]</sup>

To a dry round-bottom flask equipped with a Dean-Stark apparatus were added anhydrous toluene (15 mL), 2-aminopyridine (5.0 mmol, 1.0 equiv), aldehydes (5.5 mmol, 1.1 equiv), *p*-tosylic acid (PTS, 10 mol%) and 4Å MS (1.0 g). The reaction mixture was refluxed for 12 h under Dean-Stark conditions and then cooled to room temperature. The molecular sieve was removed by filtration. The solvent was evaporated in vacuo, and the residual was purified by silica gel column chromatography to give products **1**.

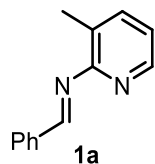

***N*-(3-methylpyridin-2-yl)-1-phenylmethanimine (1a)** <sup>[1]</sup>

**<sup>1</sup>H NMR** (600 MHz, CDCl<sub>3</sub>) δ 9.07 (s, 1H), 8.30 (d, *J* = 4.0 Hz, 1H), 8.03 – 7.97 (m, 2H), 7.52 (d, *J* = 7.4 Hz, 1H), 7.50 – 7.43 (m, 3H), 7.06 (dd, *J* = 7.3, 4.8 Hz, 1H), 2.45 (s, 3H); **<sup>13</sup>C NMR** (150 MHz, CDCl<sub>3</sub>) δ 161.5, 159.4, 146.1, 138.8, 136.2, 131.6, 129.3, 128.7, 128.6, 121.8, 17.3.

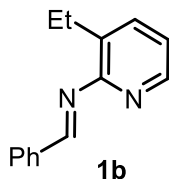

***N*-(3-ethylpyridin-2-yl)-1-phenylmethanimine (1b)**

**<sup>1</sup>H NMR** (400 MHz, CDCl<sub>3</sub>) δ 9.10 (s, 1H), 8.32 (dd, *J* = 4.7, 1.6 Hz, 1H), 8.05 – 7.94 (m, 2H), 7.56 (d, *J* = 7.5 Hz, 1H), 7.51 – 7.41 (m, 3H), 7.11 (dd, *J* = 7.5, 4.8 Hz, 1H), 2.89 (q, *J* = 7.5 Hz, 2H), 1.24 (t, *J* = 7.6 Hz, 3H); **<sup>13</sup>C NMR** (100 MHz, CDCl<sub>3</sub>) δ 161.5, 159.0, 146.1, 137.2, 136.4, 134.5, 131.6, 129.4, 128.6, 122.0, 24.3, 14.6; **HRMS (ESI)** calcd for [M+H]<sup>+</sup> C<sub>14</sub>H<sub>15</sub>N<sub>2</sub>, *m/z*: 211.1230, found: 211.1225, Error 2.4 ppm.

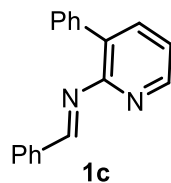

**1-phenyl-*N*-(3-phenylpyridin-2-yl)methanimine (1c)**

**<sup>1</sup>H NMR** (600 MHz, CDCl<sub>3</sub>) δ 9.21 – 9.13 (m, 1H), 8.45 (dd, *J* = 4.6, 1.2 Hz, 1H), 7.87 (d, *J* = 7.5 Hz, 2H), 7.79 – 7.71 (m, 1H), 7.54 (d, *J* = 7.3 Hz, 2H), 7.43 – 7.36 (m, 5H), 7.33 (t, *J* = 7.3 Hz, 1H), 7.21 – 7.19 (m, 1H); **<sup>13</sup>C NMR** (150 MHz, CDCl<sub>3</sub>) δ 162.4, 157.8, 147.6, 138.6, 137.7, 136.1, 132.0, 131.6, 130.2, 129.5, 128.6, 127.7, 127.3, 122.0; **HRMS (ESI)** calcd for [M+H]<sup>+</sup> C<sub>18</sub>H<sub>15</sub>N<sub>2</sub>, *m/z*: 259.1230, found: 259.1225, Error 1.9 ppm.

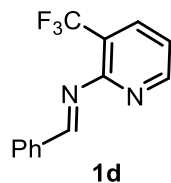

**1-phenyl-*N*-(3-(trifluoromethyl)pyridin-2-yl)methanimine (1d)**

**<sup>1</sup>H NMR** (600 MHz, CDCl<sub>3</sub>) δ 9.11 (s, 1H), 8.60 (d, *J* = 4.1 Hz, 1H), 8.02 (d, *J* = 7.0 Hz, 2H), 7.99 (d, *J* = 7.1 Hz, 1H), 7.54 – 7.50 (m, 1H), 7.48 (t, *J* = 7.3 Hz, 2H), 7.24 (dd, *J* = 7.4, 4.8 Hz, 1H); **<sup>13</sup>C NMR** (150 MHz, CDCl<sub>3</sub>) δ 164.0, 158.6, 151.8, 135.6, 135.4 (q, *J* = 5.0 Hz), 132.5, 130.0, 128.8, 125.2 (q, *J* = 270.9 Hz), 120.6 (q, *J* = 731.6 Hz), 121.0; **<sup>19</sup>F NMR** (376 MHz, CDCl<sub>3</sub>) δ -61.1; **HRMS (ESI)** calcd for [M+H]<sup>+</sup> C<sub>13</sub>H<sub>10</sub>F<sub>3</sub>N<sub>2</sub>, *m/z*: 251.0791, found: 251.0784, Error 2.8 ppm.

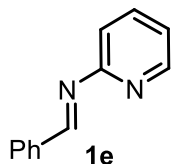

**1-phenyl-N-(pyridin-2-yl)methanimine (1e)**<sup>[1]</sup>

<sup>1</sup>H NMR (600 MHz, CDCl<sub>3</sub>) δ 9.15 (s, 1H), 8.50 (dd, *J* = 4.7, 1.0 Hz, 1H), 8.02 – 7.95 (m, 2H), 7.77 – 7.74 (m, 1H), 7.54 – 7.45 (m, 3H), 7.34 (d, *J* = 7.9 Hz, 1H), 7.21 – 7.15 (m, 1H).

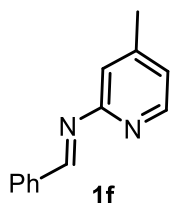

**N-(4-methylpyridin-2-yl)-1-phenylmethanimine (1f)**<sup>[1]</sup>

<sup>1</sup>H NMR (400 MHz, CDCl<sub>3</sub>) δ 9.14 (s, 1H), 8.35 (d, *J* = 4.8 Hz, 1H), 8.07 – 7.86 (m, 2H), 7.48 (d, *J* = 6.6 Hz, 3H), 7.16 (s, 1H), 7.00 (d, *J* = 4.3 Hz, 1H), 2.39 (s, 3H).

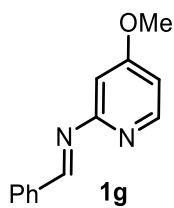

**N-(4-methoxypyridin-2-yl)-1-phenylmethanimine (1g)**<sup>[1]</sup>

<sup>1</sup>H NMR (600 MHz, CDCl<sub>3</sub>) δ 9.17 (s, 1H), 8.30 (d, *J* = 5.7 Hz, 1H), 7.98 (d, *J* = 6.6 Hz, 2H), 7.48 (d, *J* = 7.4 Hz, 3H), 6.86 (d, *J* = 2.4 Hz, 1H), 6.73 (dd, *J* = 5.7, 2.4 Hz, 1H), 3.89 (s, 3H); <sup>13</sup>C NMR (150 MHz, CDCl<sub>3</sub>) δ 167.4, 163.0, 162.9, 149.6, 135.8, 131.9, 129.4, 128.7, 109.1, 104.7, 55.3.

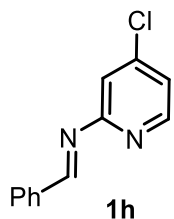

**N-(4-chloropyridin-2-yl)-1-phenylmethanimine (1h)**

<sup>1</sup>H NMR (600 MHz, CDCl<sub>3</sub>) δ 9.12 (s, 1H), 8.39 (s, 1H), 7.98 (d, *J* = 7.2 Hz, 2H), 7.49 (d, *J* = 7.1 Hz, 3H), 7.35 (s, 1H), 7.19 (d, *J* = 4.3 Hz, 1H); <sup>13</sup>C NMR (150 MHz, CDCl<sub>3</sub>) δ 164.1, 162.4, 149.5, 145.4, 135.5, 132.3, 129.7, 128.8, 122.0, 120.0; HRMS (ESI) calcd for [M+H]<sup>+</sup> C<sub>12</sub>H<sub>10</sub>ClN<sub>2</sub>, *m/z*: 217.0527, found: 217.0523, Error 1.8 ppm.

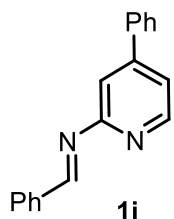

**1-phenyl-*N*-(4-phenylpyridin-2-yl)methanimine (1i)**

**<sup>1</sup>H NMR** (600 MHz, CDCl<sub>3</sub>) δ 9.23 (s, 1H), 8.74 (d, *J* = 2.3 Hz, 1H), 8.02 (dd, *J* = 7.8, 1.4 Hz, 2H), 7.97 (dd, *J* = 8.2, 2.5 Hz, 1H), 7.66 – 7.60 (m, 2H), 7.55 – 7.47 (m, 5H), 7.45 – 7.39 (m, 2H); **<sup>13</sup>C NMR** (150 MHz, CDCl<sub>3</sub>) δ 162.7, 160.0, 147.3, 137.5, 136.5, 135.9, 134.9, 132.0, 129.5, 129.1, 128.8, 128.0, 126.9, 119.9; **HRMS (ESI)** calcd for [M+H]<sup>+</sup> C<sub>18</sub>H<sub>15</sub>N<sub>2</sub>, *m/z*: 259.1230, found: 259.1225, Error 1.9 ppm.

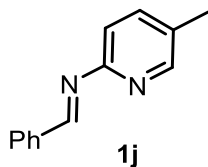

***N*-(5-methylpyridin-2-yl)-1-phenylmethanimine (1j) [2]**

**<sup>1</sup>H NMR** (600 MHz, CDCl<sub>3</sub>) δ 9.16 (s, 1H), 8.31 (s, 1H), 7.98 (d, *J* = 6.5 Hz, 2H), 7.54 (d, *J* = 8.0 Hz, 1H), 7.51 – 7.43 (m, 3H), 7.24 (d, *J* = 8.0 Hz, 1H), 2.34 (s, 3H); **<sup>13</sup>C NMR** (150 MHz, CDCl<sub>3</sub>) δ 161.9, 158.8, 148.9, 138.7, 136.0, 131.4, 129.4, 129.3, 128.7, 119.4, 18.0.

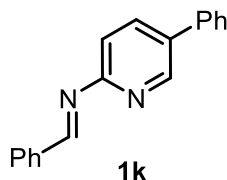

**1-phenyl-*N*-(5-phenylpyridin-2-yl)methanimine (1k)**

**<sup>1</sup>H NMR** (600 MHz, CDCl<sub>3</sub>) δ 9.22 (s, 1H), 8.53 (d, *J* = 5.0 Hz, 1H), 8.01 (d, *J* = 7.1 Hz, 2H), 7.69 (d, *J* = 7.7 Hz, 2H), 7.58 (s, 1H), 7.54 – 7.46 (m, 5H), 7.44 (d, *J* = 7.1 Hz, 1H), 7.40 (d, *J* = 5.0 Hz, 1H); **<sup>13</sup>C NMR** (150 MHz, CDCl<sub>3</sub>) δ 163.1, 161.7, 150.6, 149.2, 138.0, 135.9, 131.9, 129.5, 129.1, 129.1, 128.7, 127.0, 119.9, 117.7; **HRMS (ESI)** calcd for [M+H]<sup>+</sup> C<sub>18</sub>H<sub>15</sub>N<sub>2</sub>, *m/z*: 259.1230, found: 259.1225, Error 1.9 ppm.

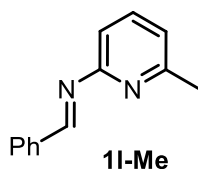

***N*-(6-methylpyridin-2-yl)-1-phenylmethanimine (1l-Me) [2]**

**<sup>1</sup>H NMR** (400 MHz, CDCl<sub>3</sub>) δ 9.07 (s, 1H), 8.04 – 7.91 (m, 2H), 7.61 (t, *J* = 7.7 Hz, 1H), 7.46 (d, *J* = 6.6 Hz, 3H), 7.09 (d, *J* = 7.8 Hz, 1H), 7.02 (d, *J* = 7.5 Hz, 1H), 2.57 (s, 3H); **<sup>13</sup>C NMR** (101 MHz, CDCl<sub>3</sub>) δ 162.6, 160.9, 157.8, 138.2, 135.9, 131.68, 129.4, 128.6, 121.2, 115.7, 24.3.

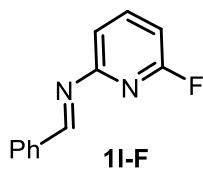

***N*-(6-fluoropyridin-2-yl)-1-phenylmethanimine (1l-F)**

**<sup>1</sup>H NMR** (400 MHz, CDCl<sub>3</sub>) δ 9.17 (s, 1H), 7.98 (d, *J* = 6.6 Hz, 2H), 7.82 (dd, *J* = 7.8, 1.8 Hz, 1H), 7.56 – 7.41 (m, 3H), 7.24 (dd, *J* = 7.5, 1.3 Hz, 1H), 6.88 – 6.76 (m, 1H); **<sup>13</sup>C NMR** (100 MHz, CDCl<sub>3</sub>) δ 163.9, 162.8 (d, *J* = 240.5 Hz), 159.3 (d, *J* = 11.0 Hz), 142.5 (d, *J* = 8.0 Hz), 135.5, 132.2, 129.6, 128.8, 117.3 (d, *J* = 4.5 Hz), 107.0 (d, *J* = 37.0 Hz).

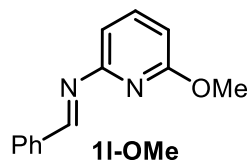

***N*-(6-methoxypyridin-2-yl)-1-phenylmethanimine (1l-OMe)**

<sup>1</sup>H NMR (400 MHz, CDCl<sub>3</sub>) δ 9.22 (s, 1H), 7.98 (dd, *J* = 7.1, 2.1 Hz, 2H), 7.61 (t, *J* = 7.8 Hz, 1H), 7.54 – 7.42 (m, 3H), 6.93 (d, *J* = 7.4 Hz, 1H), 6.64 (d, *J* = 8.1 Hz, 1H), 3.98 (s, 3H); <sup>13</sup>C NMR (100 MHz, CDCl<sub>3</sub>) δ 163.4, 162.0, 158.6, 140.2, 136.0, 131.7, 129.4, 128.7, 112.5, 108.9, 53.2.

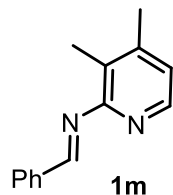

***N*-(3,4-dimethylpyridin-2-yl)-1-phenylmethanimine (1m)**

<sup>1</sup>H NMR (600 MHz, CDCl<sub>3</sub>) δ 9.05 (s, 1H), 8.17 (d, *J* = 4.8 Hz, 1H), 8.03 – 7.96 (m, 2H), 7.45 (d, *J* = 6.4 Hz, 3H), 6.95 (d, *J* = 4.8 Hz, 1H), 2.40 (s, 3H), 2.29 (s, 3H); <sup>13</sup>C NMR (150 MHz, CDCl<sub>3</sub>) δ 161.4, 159.1, 147.5, 145.3, 136.3, 131.4, 129.2, 128.6, 127.4, 123.4, 19.5, 13.1. **HRMS (ESI)** calcd for [M+H]<sup>+</sup> C<sub>14</sub>H<sub>15</sub>N<sub>2</sub>, *m/z*: 221.1230, found: 221.1225, Error 2.3 ppm.

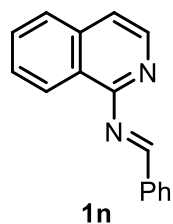

***N*-(isoquinolin-1-yl)-1-phenylmethanimine (1n)**

<sup>1</sup>H NMR (600 MHz, CDCl<sub>3</sub>) δ 9.18 (s, 1H), 8.63 (d, *J* = 8.3 Hz, 1H), 8.33 (d, *J* = 5.7 Hz, 1H), 8.13 – 8.04 (m, 2H), 7.72 (d, *J* = 8.1 Hz, 1H), 7.61 (t, *J* = 7.5 Hz, 1H), 7.54 (t, *J* = 7.6 Hz, 1H), 7.51 – 7.43 (m, 4H); <sup>13</sup>C NMR (150 MHz, CDCl<sub>3</sub>) δ 163.2, 159.5, 141.4, 137.3, 135.9, 132.0, 130.3, 129.6, 128.6, 126.8, 126.0, 125.9, 124.5, 119.5; **HRMS (ESI)** calcd for [M+H]<sup>+</sup> C<sub>16</sub>H<sub>13</sub>N<sub>2</sub>, *m/z*: 233.1073, found: 233.1068, Error 2.1 ppm.

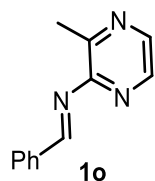

***N*-(3-methylpyrazin-2-yl)-1-phenylmethanimine (1o)**

<sup>1</sup>H NMR (600 MHz, CDCl<sub>3</sub>) δ 9.07 (s, 1H), 8.33 (d, *J* = 2.4 Hz, 1H), 8.24 (d, *J* = 2.3 Hz, 1H), 8.01 (d, *J* = 7.2 Hz, 2H), 7.53 (t, *J* = 7.1 Hz, 1H), 7.49 (t, *J* = 7.3 Hz, 2H), 2.72 (s, 3H); <sup>13</sup>C NMR (150 MHz, CDCl<sub>3</sub>) δ 163.8, 155.2, 150.8, 141.7, 140.5, 135.7, 132.3, 129.6, 128.7, 20.6; **HRMS (ESI)** calcd for [M+H]<sup>+</sup> C<sub>12</sub>H<sub>12</sub>N<sub>3</sub>, *m/z*: 198.1026, found: 198.1022, Error 2.0 ppm.

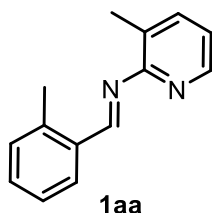

***N*-(3-methylpyridin-2-yl)-1-(*o*-tolyl)methanimine (1aa)<sup>[1]</sup>**

<sup>1</sup>H NMR (400 MHz, CDCl<sub>3</sub>) δ 9.36 (s, 1H), 8.29 (dd, *J* = 4.7, 1.3 Hz, 1H), 8.14 (dd, *J* = 7.6, 1.3 Hz, 1H), 7.47 (dd, *J* = 7.4, 0.6 Hz, 1H), 7.32 (td, *J* = 7.4, 1.6 Hz, 1H), 7.27 (t, *J* = 7.0 Hz, 1H), 7.19 (d, *J* = 7.4 Hz, 1H), 7.02 (dd, *J* = 7.4, 4.8 Hz, 1H), 2.65 (s, 3H), 2.43 (s, 3H); <sup>13</sup>C NMR (100 MHz, CDCl<sub>3</sub>) δ 160.4, 159.7, 146.0, 139.4, 138.5, 134.0, 131.0, 130.9, 129.0, 128.5, 126.0, 121.5, 19.8, 17.4.

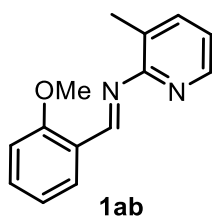

**1-(2-methoxyphenyl)-*N*-(3-methylpyridin-2-yl)methanimine (1ab)**

<sup>1</sup>H NMR (600 MHz, CDCl<sub>3</sub>) δ 9.48 (s, 1H), 8.29 (d, *J* = 24.2 Hz, 2H), 7.48 (d, *J* = 42.5 Hz, 2H), 7.00 (d, *J* = 57.3 Hz, 3H), 3.89 (s, 3H), 2.44 (s, 3H); <sup>13</sup>C NMR (150 MHz, CDCl<sub>3</sub>) δ 160.4, 160.2, 157.7, 146.2, 138.6, 133.1, 128.5, 127.9, 124.9, 121.4, 120.7, 111.2, 55.5, 17.5; **HRMS (ESI)** calcd for [M+H]<sup>+</sup> C<sub>14</sub>H<sub>15</sub>N<sub>2</sub>O, *m/z*: 227.1179, found: 227.1176, Error 1.3 ppm.

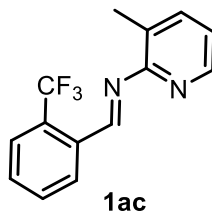

***N*-(3-methylpyridin-2-yl)-1-(2-(trifluoromethyl)phenyl)methanimine (1ac)**

<sup>1</sup>H NMR (600 MHz, CDCl<sub>3</sub>) δ 9.46 (d, *J* = 1.3 Hz, 1H), 8.53 (d, *J* = 7.8 Hz, 1H), 8.33 (d, *J* = 4.2 Hz, 1H), 7.74 (d, *J* = 7.8 Hz, 1H), 7.65 (t, *J* = 7.6 Hz, 1H), 7.56 (dd, *J* = 14.7, 7.4 Hz, 2H), 7.10 (dd, *J* = 7.3, 4.9 Hz, 1H), 2.46 (s, 3H); <sup>13</sup>C NMR (150 MHz, CDCl<sub>3</sub>) δ 159.00, 157.71, 146.34, 138.89, 134.22, 131.92, 130.88, 130.3 (q, *J* = 30.9 Hz), 128.91, 128.80, 125.7 (q, *J* = 5.4 Hz), 124.1, 122.32, 17.31; <sup>19</sup>F NMR (565 MHz, CDCl<sub>3</sub>) δ -56.8; **HRMS (ESI)** calcd for [M+H]<sup>+</sup> C<sub>14</sub>H<sub>12</sub>F<sub>3</sub>N<sub>2</sub>, *m/z*: 265.0947, found: 265.0940, Error 2.6 ppm.

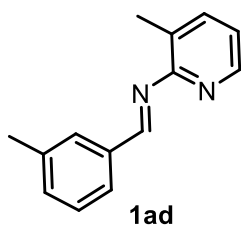

***N*-(3-methylpyridin-2-yl)-1-(*m*-tolyl)methanimine (1ad)<sup>[2]</sup>**

<sup>1</sup>H NMR (600 MHz, CDCl<sub>3</sub>) δ 9.03 (s, 1H), 8.36 – 8.24 (m, 1H), 7.83 (s, 1H), 7.77 (d, *J* = 7.5 Hz, 1H), 7.51 (dd, *J* = 7.4, 0.6 Hz, 1H), 7.34 (t, *J* = 7.5 Hz, 1H), 7.29 (d, *J* = 7.5 Hz, 1H), 7.05 (dd, *J* = 7.4, 4.8



Hz, 1H), 2.45 (s, 3H), 2.40 (d,  $J = 7.6$  Hz, 3H);  $^{13}\text{C}$  NMR (150 MHz,  $\text{CDCl}_3$ )  $\delta$  161.8, 159.5, 146.1, 138.7, 138.28, 136.2, 132.5, 129.5, 128.6, 128.5, 126.9, 121.6, 21.2, 17.3.

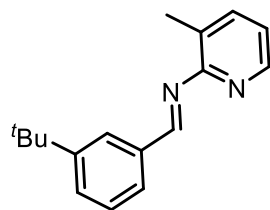

**1ae**

**1-(3-(tert-butyl)phenyl)-N-(3-methylpyridin-2-yl)methanimine (1ae)**

$^1\text{H}$  NMR (600 MHz,  $\text{CDCl}_3$ )  $\delta$  9.06 (s, 1H), 8.31 (d,  $J = 3.7$  Hz, 1H), 8.03 (s, 1H), 7.85 (d,  $J = 7.6$  Hz, 1H), 7.55 – 7.51 (m, 2H), 7.42 (d,  $J = 7.7$  Hz, 1H), 7.08 (dd,  $J = 7.4, 4.8$  Hz, 1H), 2.46 (s, 3H), 1.38 (s, 9H);  $^{13}\text{C}$  NMR (150 MHz,  $\text{CDCl}_3$ )  $\delta$  162.2, 159.7, 151.6, 146.1, 138.8, 136.0, 128.9, 128.6, 128.4, 126.6, 126.5, 121.7, 34.7, 31.3, 17.4; **HRMS (ESI)** calcd for  $[\text{M}+\text{H}]^+$   $\text{C}_{17}\text{H}_{21}\text{N}_2$ ,  $m/z$ : 253.1699, found: 253.1696, Error 1.2 ppm.

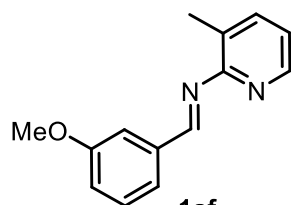

**1af**

**1-(3-methoxyphenyl)-N-(3-methylpyridin-2-yl)methanimine (1af)**<sup>[2]</sup>

$^1\text{H}$  NMR (600 MHz,  $\text{CDCl}_3$ )  $\delta$  9.03 (s, 1H), 8.30 (d,  $J = 4.3$  Hz, 1H), 7.61 (s, 1H), 7.53 (d,  $J = 7.3$  Hz, 2H), 7.37 (t,  $J = 7.8$  Hz, 1H), 7.07 (dd,  $J = 7.4, 4.8$  Hz, 1H), 7.04 (dd,  $J = 8.2, 2.4$  Hz, 1H), 3.87 (s, 3H), 2.45 (s, 3H);  $^{13}\text{C}$  NMR (150 MHz,  $\text{CDCl}_3$ )  $\delta$  161.5, 159.8, 159.4, 146.1, 138.8, 137.6, 129.6, 128.7, 122.7, 121.8, 118.2, 112.8, 55.3, 17.3.

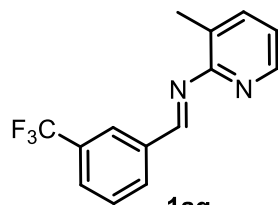

**1ag**

**N-(3-methylpyridin-2-yl)-1-(3-(trifluoromethyl)phenyl)methanimine (1ag)**

$^1\text{H}$  NMR (600 MHz,  $\text{CDCl}_3$ )  $\delta$  9.13 (d,  $J = 2.5$  Hz, 1H), 8.29 (d,  $J = 9.9$  Hz, 2H), 8.13 (d,  $J = 4.6$  Hz, 1H), 7.76 – 7.69 (m, 1H), 7.63 – 7.48 (m, 2H), 7.15 – 7.04 (m, 1H), 2.46 (d,  $J = 3.0$  Hz, 3H);  $^{13}\text{C}$  NMR (150 MHz,  $\text{CDCl}_3$ )  $\delta$  159.8, 158.6, 146.1, 139.0, 136.9, 132.5, 131.2 (q,  $J = 32.4$  Hz), 129.2, 129.1, 127.8, 125.6, 123.9 (q,  $J = 32.4$  Hz), 122.3, 17.2;  $^{19}\text{F}$  NMR (565 MHz,  $\text{CDCl}_3$ )  $\delta$  -62.8; **HRMS (ESI)** calcd for  $[\text{M}+\text{H}]^+$   $\text{C}_{14}\text{H}_{12}\text{F}_3\text{N}_2$ ,  $m/z$ : 265.0947, found: 265.0941, Error 2.3 ppm.

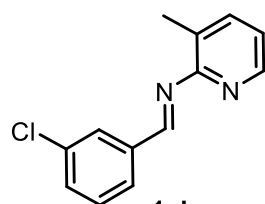

**1ah**

**1-(3-chlorophenyl)-N-(3-methylpyridin-2-yl)methanimine (1ah)**

**<sup>1</sup>H NMR** (600 MHz, CDCl<sub>3</sub>) δ 9.03 (s, 1H), 8.34 – 8.25 (m, 1H), 8.03 (s, 1H), 7.80 (d, *J* = 7.6 Hz, 1H), 7.58 – 7.48 (m, 1H), 7.48 – 7.41 (m, 1H), 7.38 (t, *J* = 7.8 Hz, 1H), 7.08 (dd, *J* = 7.4, 4.8 Hz, 1H); **<sup>13</sup>C NMR** (150 MHz, CDCl<sub>3</sub>) δ 159.9, 158.7, 146.1, 138.9, 138.0, 134.8, 131.4, 129.9, 129.0, 128.5, 127.9, 122.2, 17.3; **HRMS (ESI)** calcd for [M+H]<sup>+</sup> C<sub>16</sub>H<sub>19</sub>N<sub>2</sub>, *m/z*: 231.0684, found: 231.0679, Error 2.2 ppm.

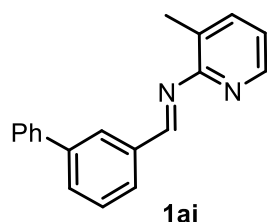

**1-([1,1'-biphenyl]-3-yl)-N-(3-methylpyridin-2-yl)methanimine (1ai)**

**<sup>1</sup>H NMR** δ 9.12 (s, 1H), 8.28 (dd, *J* = 4.7, 1.3 Hz, 1H), 8.22 (s, 1H), 7.93 (d, *J* = 7.7 Hz, 1H), 7.64 (d, *J* = 7.8 Hz, 1H), 7.61 – 7.57 (m, 2H), 7.49 – 7.41 (m, 2H), 7.39 (t, *J* = 7.6 Hz, 2H), 7.30 (t, *J* = 7.3 Hz, 1H), 6.98 (dd, *J* = 7.4, 4.8 Hz, 1H), 2.42 (s, 3H); **<sup>13</sup>C NMR** (100 MHz, CDCl<sub>3</sub>) δ 161.3, 159.1, 145.9, 141.4, 140.2, 138.6, 136.6, 130.1, 128.9, 128.6, 128.6, 128.1, 127.7, 127.4, 126.9, 121.7, 17.2; **HRMS (ESI)** calcd for [M+H]<sup>+</sup> C<sub>19</sub>H<sub>17</sub>N<sub>2</sub>, *m/z*: 273.1386, found: 273.1382, Error 1.5 ppm.

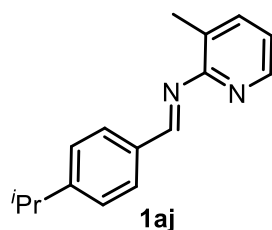

**1-(4-isopropylphenyl)-N-(3-methylpyridin-2-yl)methanimine (1aj)**

**<sup>1</sup>H NMR** (600 MHz, CDCl<sub>3</sub>) δ 9.03 (s, 1H), 8.34 – 8.25 (m, 1H), 7.93 (d, *J* = 8.1 Hz, 2H), 7.51 (d, *J* = 7.4 Hz, 1H), 7.32 (d, *J* = 8.1 Hz, 2H), 7.05 (dd, *J* = 7.4, 4.8 Hz, 1H), 3.03 – 2.90 (m, 1H), 2.44 (s, 3H), 1.28 (d, *J* = 6.9 Hz, 6H); **<sup>13</sup>C NMR** (150 MHz, CDCl<sub>3</sub>) δ 161.4, 159.7, 153.0, 146.0, 138.7, 134.1, 129.5, 128.6, 126.8, 121.5, 34.2, 23.7, 17.4; **HRMS (ESI)** calcd for [M+H]<sup>+</sup> C<sub>16</sub>H<sub>19</sub>N<sub>2</sub>, *m/z*: 239.1543, found: 239.1538, Error 2.1 ppm.

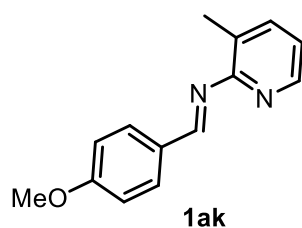

**1-(4-methoxyphenyl)-N-(3-methylpyridin-2-yl)methanimine (1ak)**<sup>[1]</sup>

**<sup>1</sup>H NMR** (600 MHz, CDCl<sub>3</sub>) δ 9.00 (s, 1H), 8.29 (d, *J* = 3.5 Hz, 1H), 7.95 (d, *J* = 8.7 Hz, 2H), 7.52 (d, *J* = 7.3 Hz, 1H), 7.05 (dd, *J* = 7.4, 4.8 Hz, 1H), 6.98 (d, *J* = 8.7 Hz, 2H), 3.86 (s, 3H), 2.44 (s, 3H).

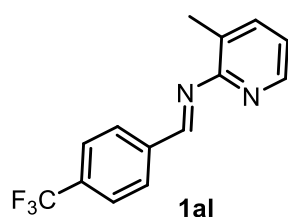

**N-(3-methylpyridin-2-yl)-1-(4-(trifluoromethyl)phenyl)methanimine (1al)**<sup>[1]</sup>

**<sup>1</sup>H NMR** (600 MHz, CDCl<sub>3</sub>) δ 9.12 (s, 1H), 8.29 (d, *J* = 4.4 Hz, 1H), 8.05 (d, *J* = 8.0 Hz, 2H), 7.67 (d, *J* = 8.0 Hz, 2H), 7.49 (d, *J* = 7.4 Hz, 1H), 7.06 (dd, *J* = 7.3, 4.8 Hz, 1H), 2.43 (s, 3H); **<sup>13</sup>C NMR** (150 MHz, CDCl<sub>3</sub>) δ 159.6, 158.4, 146.0, 139.2, 138.9, 132.7 (q, *J* = 32.3 Hz), 129.3, 129.2, 125.4 (q, *J* = 3.5 Hz), 123.8 (q, *J* = 270.8 Hz), 122.3, 17.1.

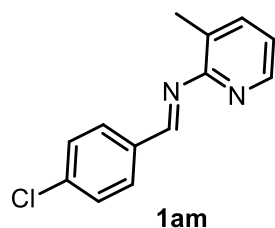

**1-(4-phenyl)-N-(3-methylpyridin-2-yl)methanimine (1ab)** <sup>[1]</sup>

**<sup>1</sup>H NMR** (600 MHz, CDCl<sub>3</sub>) δ 9.03 (s, 1H), 8.29 (d, *J* = 4.4 Hz, 1H), 7.91 (d, *J* = 8.1 Hz, 2H), 7.51 (d, *J* = 7.3 Hz, 1H), 7.42 (d, *J* = 8.0 Hz, 2H), 7.14 – 6.96 (m, 1H), 2.44 (s, 3H). **<sup>13</sup>C NMR** (150 MHz, CDCl<sub>3</sub>) δ 160.0, 158.9, 146.1, 138.8, 137.6, 134.7, 130.4, 128.9, 128.9, 122.0, 17.3.

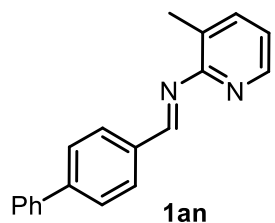

**1-([1,1'-biphenyl]-4-yl)-N-(3-methylpyridin-2-yl)methanimine (1an)**

**<sup>1</sup>H NMR** (600 MHz, CDCl<sub>3</sub>) δ 9.11 (s, 1H), 8.30 (d, *J* = 4.5 Hz, 1H), 8.05 (d, *J* = 8.2 Hz, 2H), 7.67 (d, *J* = 8.2 Hz, 2H), 7.62 (d, *J* = 7.3 Hz, 2H), 7.50 (d, *J* = 7.4 Hz, 1H), 7.43 (t, *J* = 7.6 Hz, 2H), 7.35 (t, *J* = 7.4 Hz, 1H), 7.05 (dd, *J* = 7.1, 5.0 Hz, 1H), 2.46 (s, 3H); **<sup>13</sup>C NMR** (150 MHz, CDCl<sub>3</sub>) δ 161.0, 159.4, 146.1, 144.2, 140.2, 138.7, 135.2, 129.8, 128.8, 128.8, 127.8, 127.3, 127.1, 121.7, 17.4.

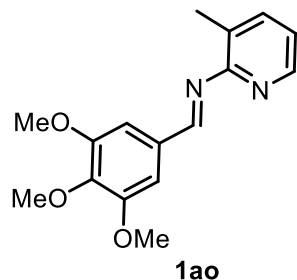

**N-(3-methylpyridin-2-yl)-1-(3,4,5-trimethoxyphenyl)methanimine (1ao)**

**<sup>1</sup>H NMR** (600 MHz, CDCl<sub>3</sub>) δ 8.96 (s, 1H), 8.30 (s, 1H), 7.54 (s, 1H), 7.27 (s, 2H), 7.08 (s, 1H), 3.94 (s, 9H), 2.46 (s, 3H); **<sup>13</sup>C NMR** (150 MHz, CDCl<sub>3</sub>) δ 161.1, 159.4, 153.4, 146.1, 141.2, 138.8, 131.7, 128.5, 121.7, 106.3, 60.9, 56.1, 17.3; **HRMS (ESI)** calcd for [M+H]<sup>+</sup> C<sub>16</sub>H<sub>19</sub>N<sub>2</sub>O<sub>3</sub>, *m/z*: 287.1390, found: 287.1384, Error 2.5 ppm.

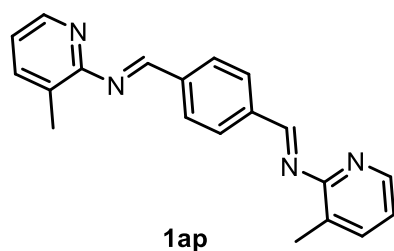

**1,1'-(1,4-phenylene)bis(*N*-(3-methylpyridin-2-yl)methanimine) (1ap)**<sup>[3]</sup>

<sup>1</sup>H NMR (600 MHz, CDCl<sub>3</sub>) δ 9.15 (s, 2H), 8.32 (d, *J* = 4.3 Hz, 2H), 8.11 (s, 4H), 7.55 (d, *J* = 7.3 Hz, 2H), 7.15 – 7.05 (m, 2H), 2.48 (s, 6H); <sup>13</sup>C NMR (150 MHz, CDCl<sub>3</sub>) δ 160.7, 159.1, 146.1, 139.0, 138.9, 129.6, 129.1, 122.1, 17.3.

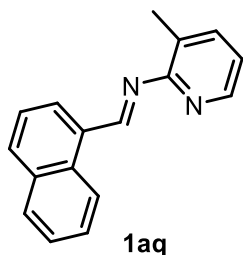

***N*-(3-methylpyridin-2-yl)-1-(naphthalen-1-yl)methanimine (1aq)**<sup>[1]</sup>

<sup>1</sup>H NMR (600 MHz, CDCl<sub>3</sub>) δ 9.70 (s, 1H), 9.35 (d, *J* = 8.6 Hz, 1H), 8.36 (d, *J* = 3.7 Hz, 1H), 8.19 (d, *J* = 7.0 Hz, 1H), 7.98 (d, *J* = 8.1 Hz, 1H), 7.91 (d, *J* = 8.1 Hz, 1H), 7.71 – 7.62 (m, 1H), 7.61 – 7.53 (m, 3H), 7.11 (dd, *J* = 7.4, 4.8 Hz, 1H), 2.54 (s, 3H).

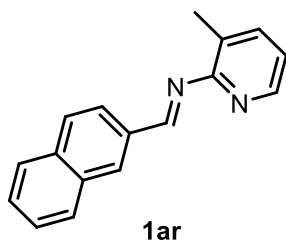

***N*-(3-methylpyridin-2-yl)-1-(naphthalen-2-yl)methanimine (1ar)**<sup>[1]</sup>

<sup>1</sup>H NMR (600 MHz, CDCl<sub>3</sub>) δ 9.23 (s, 1H), 8.33 (dd, *J* = 4.7, 1.3 Hz, 1H), 8.29 – 8.25 (m, 2H), 7.94 – 7.88 (m, 3H), 7.57 – 7.51 (m, 3H), 7.09 (dd, *J* = 7.4, 4.8 Hz, 1H), 2.50 (s, 3H).

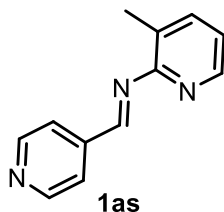

***N*-(3-methylpyridin-2-yl)-1-(pyridin-4-yl)methanimine (1as)**<sup>[4]</sup>

<sup>1</sup>H NMR (600 MHz, CDCl<sub>3</sub>) δ 9.07 (s, 1H), 8.79 – 8.69 (m, 2H), 8.29 (d, *J* = 4.0 Hz, 1H), 7.83 – 7.71 (m, 2H), 7.51 (d, *J* = 7.3 Hz, 1H), 7.12 – 7.05 (m, 1H), 2.44 (s, 3H); <sup>13</sup>C NMR (150 MHz, CDCl<sub>3</sub>) δ 158.9, 157.6, 150.1, 145.8, 142.3, 138.7, 129.1, 122.4, 122.2, 16.8.

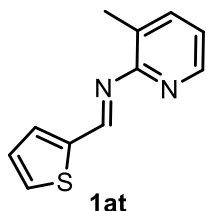

***N*-(3-methylpyridin-2-yl)-1-(thiophen-2-yl)methanimine (1at)**<sup>[1]</sup>

<sup>1</sup>H NMR (600 MHz, CDCl<sub>3</sub>) δ 9.23 (d, *J* = 0.5 Hz, 1H), 8.27 (dd, *J* = 4.7, 1.2 Hz, 1H), 7.56 (dd, *J* = 3.6, 0.9 Hz, 1H), 7.54 – 7.48 (m, 2H), 7.12 (dd, *J* = 5.0, 3.7 Hz, 1H), 7.05 (dd, *J* = 7.4, 4.8 Hz, 1H), 2.44 (s,

3H);  $^{13}\text{C NMR}$  (150 MHz,  $\text{CDCl}_3$ )  $\delta$  158.7, 154.1, 146.0, 143.2, 138.8, 133.3, 130.8, 128.9, 127.8, 121.8, 17.3.

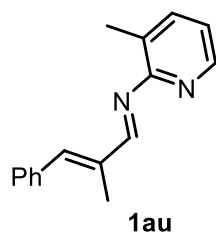

**2-methyl-N-(3-methylpyridin-2-yl)-3-phenylprop-2-en-1-imine (1au)**

$^1\text{H NMR}$  (400 MHz,  $\text{CDCl}_3$ )  $\delta$  8.74 (s, 1H), 8.28 (dd,  $J = 4.8, 1.3$  Hz, 1H), 7.49 (dd,  $J = 12.0, 4.2$  Hz, 3H), 7.40 (dd,  $J = 10.4, 4.8$  Hz, 2H), 7.30 (t,  $J = 7.3$  Hz, 1H), 7.12 (s, 1H), 7.03 (dd,  $J = 7.4, 4.8$  Hz, 1H), 2.40 (s, 3H), 2.32 (d,  $J = 0.9$  Hz, 3H);  $^{13}\text{C NMR}$  (100 MHz,  $\text{CDCl}_3$ )  $\delta$  166.4, 159.9, 146.1, 143.1, 138.5, 137.5, 136.5, 129.6, 128.3, 128.3, 128.1, 121.3, 17.3, 12.9; **HRMS (ESI)** calcd for  $[\text{M}+\text{H}]^+$   $\text{C}_{16}\text{H}_{17}\text{N}_2$ ,  $m/z$ : 237.1386, found: 237.1380, Error 2.5 ppm.

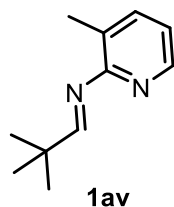

**2,2-dimethyl-N-(3-methylpyridin-2-yl)propan-1-imine (1av)** <sup>[1]</sup>

$^1\text{H NMR}$  (400 MHz,  $\text{CDCl}_3$ )  $\delta$  8.23 (dd,  $J = 4.8, 1.2$  Hz, 1H), 8.15 (s, 1H), 7.50 – 7.42 (m, 1H), 7.02 (dd,  $J = 7.4, 4.9$  Hz, 1H), 2.30 (s, 3H), 1.23 (s, 9H);  $^{13}\text{C NMR}$  (100 MHz,  $\text{CDCl}_3$ )  $\delta$  174.8, 160.6, 146.1, 138.4, 126.7, 121.0, 37.1, 26.7, 17.2.

**2.2 Preparation and identification of vinyl bromides**

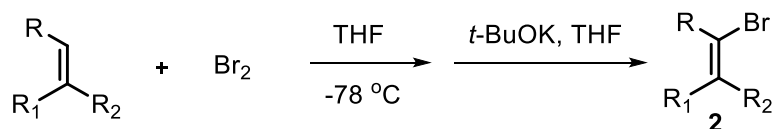

At  $-78\text{ }^\circ\text{C}$ , a solution of the above olefin in THF (20 mL) was added  $\text{Br}_2$  (12 mmol, 1.2 equiv), after 5 mins, the reaction was quenched with saturated  $\text{Na}_2\text{S}_2\text{O}_3$  aqueous solution. The residue was washed with brine, dried over anhydrous  $\text{Na}_2\text{SO}_4$ . The solution was added potassium tert-butoxide (15 mmol, 1.5 equiv). After stirred for 3 h, the mixture was washed by water and brine successively. The organic layer was dried over anhydrous  $\text{Na}_2\text{SO}_4$  and concentrated carefully to get corresponding vinyl bromide **2**.

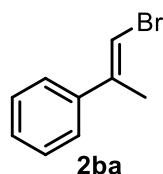

**(1-bromoprop-1-en-2-yl)benzene (2ba)** <sup>[5]</sup>

$^1\text{H NMR}$  (600 MHz,  $\text{CDCl}_3$ )  $\delta$  7.33 (d,  $J = 4.3$  Hz, 4H), 7.34 – 7.27 (m, 1H), 6.44 (s, 1H), 2.22 (s, 3H);  $^{13}\text{C NMR}$  (150 MHz,  $\text{CDCl}_3$ )  $\delta$  141.5, 140.9, 128.5, 127.8, 126.0, 105.4, 19.6

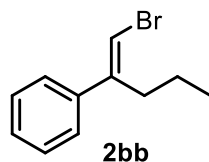

**(1-bromopent-1-en-2-yl)benzene (2bb)** <sup>[6]</sup>

<sup>1</sup>H NMR (400 MHz, CDCl<sub>3</sub>) δ 7.35 – 7.23 (m, 5H), 6.34 (s, 1H), 2.73 – 2.62 (m, 2H), 1.53 – 1.36 (m, 2H), 0.91 (t, *J* = 7.4 Hz, 3H); <sup>13</sup>C NMR (100 MHz, CDCl<sub>3</sub>) δ 146.3, 140.3, 128.5, 127.7, 126.6, 105.1, 35.0, 20.6, 13.7.

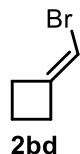

**(bromomethylene)cyclobutene (2bd)**

<sup>1</sup>H NMR (400 MHz, CDCl<sub>3</sub>) δ 5.80 – 5.71 (m, 1H), 3.51 (d, *J* = 10.4 Hz, 2H), 2.69 – 2.61 (m, 4H), 2.05 – 1.91 (m, 2H), 0.93 (s, 2H); <sup>13</sup>C NMR (100 MHz, CDCl<sub>3</sub>) δ 146.2, 95.9, 31.3, 30.7, 15.7; HRMS (ESI) calcd for [M+H]<sup>+</sup> C<sub>5</sub>H<sub>8</sub>Br, *m/z*: 146.9804, found: 146.9804, Error 0 ppm.

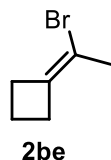

**(1-bromoethylidene)cyclobutene (2be)**

<sup>1</sup>H NMR (400 MHz, CDCl<sub>3</sub>) δ 2.62 (d, *J* = 8.0 Hz, 4H), 2.08 (s, 3H), 1.98 – 1.82 (m, 2H); <sup>13</sup>C NMR (100 MHz, CDCl<sub>3</sub>) δ 138.6, 110.6, 31.9, 29.31, 22.8, 14.6; HRMS (ESI) calcd for [M+H]<sup>+</sup> C<sub>6</sub>H<sub>10</sub>Br, *m/z*: 160.9960, found: 160.9960, Error 0 ppm.

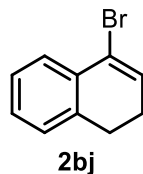

**4-bromo-1,2-dihydronaphthalene (2bj)** <sup>[8]</sup>

<sup>1</sup>H NMR (600 MHz, CDCl<sub>3</sub>) δ 7.53 (d, *J* = 7.7 Hz, 1H), 7.21 (t, *J* = 7.4 Hz, 1H), 7.18 – 7.13 (m, 1H), 7.06 (d, *J* = 7.3 Hz, 1H), 6.40 (t, *J* = 4.8 Hz, 1H), 2.80 (t, *J* = 8.1 Hz, 2H), 2.36 – 2.27 (m, 2H); <sup>13</sup>C NMR (150 MHz, CDCl<sub>3</sub>) δ 136.2, 133.0, 130.6, 128.2, 127.2, 126.7, 126.4, 121.3, 27.5, 25.4.

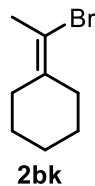

**(1-bromoethylidene)cyclohexane (2bk)**

$^1\text{H NMR}$  (400 MHz,  $\text{CDCl}_3$ )  $\delta$  2.42 – 2.34 (m, 2H), 2.30 (s, 3H), 2.26 – 2.19 (m, 2H), 1.57 – 1.45 (m, 6H);  $^{13}\text{C NMR}$  (100 MHz,  $\text{CDCl}_3$ )  $\delta$  137.3, 113.0, 35.1, 30.8, 27.4, 27.1, 26.3, 24.6; **HRMS (ESI)** calcd for  $[\text{M}+\text{H}]^+$   $\text{C}_8\text{H}_{14}\text{Br}$ ,  $m/z$ : 189.0273, found: 189.0270, Error 1.6 ppm.

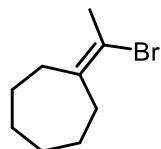

**2bl**

**(1-bromoethylidene)cycloheptane (2bl)**

$^1\text{H NMR}$  (600 MHz,  $\text{CDCl}_3$ )  $\delta$  2.45 – 2.39 (m, 2H), 2.33 – 2.26 (m, 5H), 1.64 – 1.56 (m, 4H), 1.53 – 1.47 (m, 4H);  $^{13}\text{C NMR}$  (150 MHz,  $\text{CDCl}_3$ )  $\delta$  138.9, 116.0, 36.5, 31.6, 28.9, 28.8, 27.5, 26.6, 24.9; **HRMS (ESI)** calcd for  $[\text{M}+\text{H}]^+$   $\text{C}_9\text{H}_{16}\text{Br}$ ,  $m/z$ : 203.0430, found: 203.0432, Error 1.0 ppm.

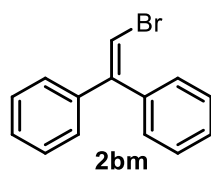

**2bm**

**(2-bromoethene-1,1-diyl)dibenzene (2bm)**<sup>[7]</sup>

$^1\text{H NMR}$  (400 MHz,  $\text{CDCl}_3$ )  $\delta$  7.42 – 7.34 (m, 3H), 7.31 – 7.26 (m, 5H), 7.22 – 7.15 (m, 2H), 6.75 (s, 1H).

**2.3 Preparation and identification of vinyl triflates**

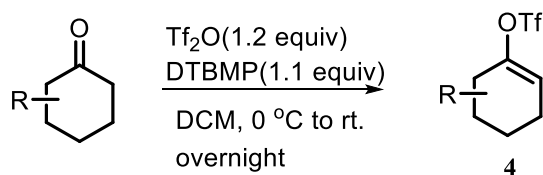

To a solution of ketone (10.0 mmol) in DCM (30 mL) was added 2,6-di-tert-butyl-4-methylpyridine (DTBMP, 11.0 mmol, 1.1 equiv) at 0 °C.  $\text{Tf}_2\text{O}$  (12.0 mmol, 1.2 equiv) was added dropwise. The reaction mixture was then allowed to warm to room temperature, stirred overnight and evaporated to dryness. Petroleum ether was added and the mixture was filtered to remove pyridinium triflate. The petroleum ether solution was washed with cool  $\text{HCl}/\text{H}_2\text{O}$  (1.0 M), brine, dried over anhydrous  $\text{Na}_2\text{SO}_4$  and concentrated under reduced pressure. The crude product was purified by flash chromatography on silica gel to give the resulting alkenyl triflate. Substrates **4** were prepared with this method.

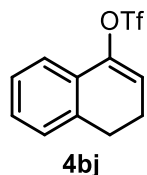

**4bj**

**3,4-dihydronaphthalen-1-yl trifluoromethanesulfonate(4bj)**<sup>[10]</sup>

$^1\text{H NMR}$  (400 MHz,  $\text{CDCl}_3$ )  $\delta$  7.38 – 7.31 (m, 1H), 7.28 – 7.21 (m, 2H), 7.19 – 7.12 (m, 1H), 6.00 (t,  $J$  = 4.8 Hz, 1H), 2.85 (t,  $J$  = 8.2 Hz, 2H), 2.53 – 2.44 (m, 2H);  $^{19}\text{F NMR}$  (376 MHz,  $\text{CDCl}_3$ )  $\delta$  -73.7.

### 3. Experimental procedures

#### 3.1 Screening of reaction conditions

**Table S1. Investigation of the catalysts**

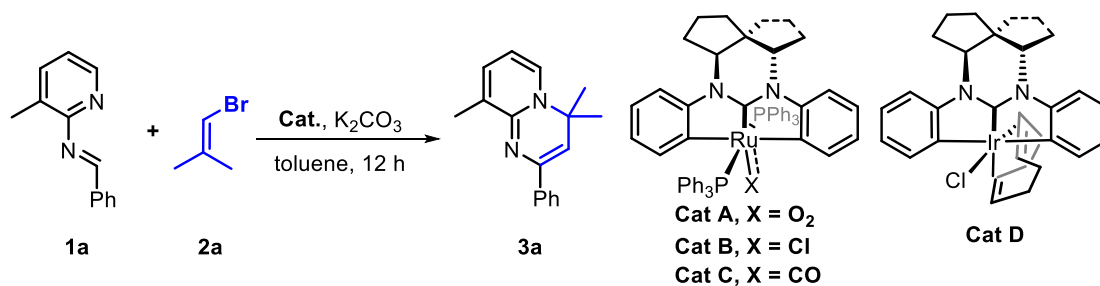

| Entry | Catalysts                               | Yield/%   |
|-------|-----------------------------------------|-----------|
| 1     | A                                       | 40        |
| 2     | <b>B</b>                                | <b>43</b> |
| 3     | C                                       | NR        |
| 4     | D                                       | NR        |
| 5     | Ru(bpy) <sub>3</sub> Cl <sub>2</sub>    | NR        |
| 6     | Cp(PPh <sub>3</sub> ) <sub>2</sub> RuCl | NR        |
| 7     | RuCl <sub>3</sub>                       | NR        |
| 8     | Ru(acac) <sub>3</sub>                   | NR        |
| 9     | RuO <sub>2</sub>                        | NR        |
| 10    | None                                    | NR        |

<sup>a</sup>General conditions: **1a** (0.1 mmol), **2a** (0.2 mmol), **Cat.** (3 mol%), K<sub>2</sub>CO<sub>3</sub> (0.15 mmol) and toluene (1.0 mL) at 110 °C for 12 h under argon atmosphere. Yields were determined by <sup>1</sup>H NMR with 1,3,5-trimethoxybenzene as internal standard.

**Table S2. Investigation of the solvent**

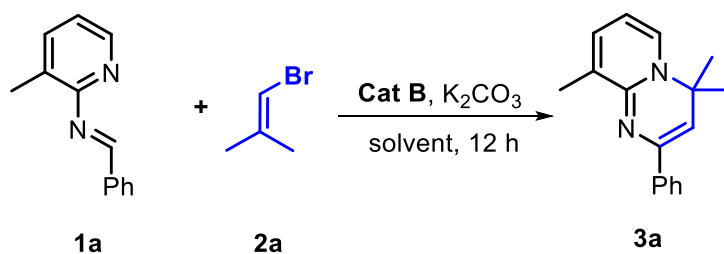

| Entry | Solvent            | Yield/%   |
|-------|--------------------|-----------|
| 1     | THF                | 48        |
| 2     | <b>1,4-dioxane</b> | <b>51</b> |
| 3     | toluene            | 43        |



|   |      |       |
|---|------|-------|
| 4 | DMF  | trace |
| 5 | NMP  | trace |
| 6 | MeCN | 12    |
| 7 | DMSO | NR    |
| 8 | DCE  | NR    |

<sup>a</sup>General conditions: **1a** (0.1 mmol), **2a** (0.2 mmol), **Cat B** (3 mol%), K<sub>2</sub>CO<sub>3</sub> (0.15 mmol) and solvent (1.0 mL) at 110 °C for 12 h under argon atmosphere. Yields were determined by <sup>1</sup>H NMR with 1,3,5-trimethoxybenzene as internal standard.

**Table S3. Investigation of the bases**

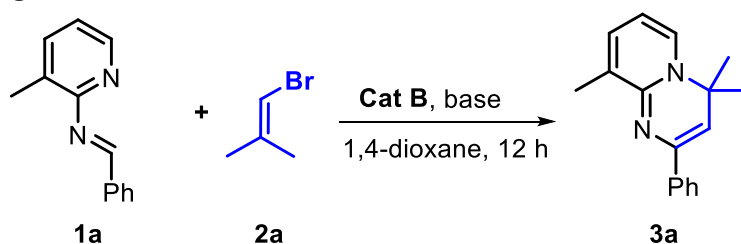

| Entry    | Base                               | Yield/%   |
|----------|------------------------------------|-----------|
| <b>1</b> | <b>K<sub>2</sub>CO<sub>3</sub></b> | <b>51</b> |
| 2        | Na <sub>2</sub> CO <sub>3</sub>    | trace     |
| 3        | Cs <sub>2</sub> CO <sub>3</sub>    | 45        |
| 4        | K <sub>3</sub> PO <sub>4</sub>     | 23        |
| 5        | KO <sup>t</sup> Bu                 | NR        |
| 6        | KOH                                | NR        |
| 7        | CH <sub>3</sub> ONa                | trace     |

<sup>a</sup>General conditions: **1a** (0.1 mmol), **2a** (0.2 mmol), **Cat B** (3 mol%), base (0.15 mmol) and 1,4-dioxane (1.0 mL) at 110 °C for 12 h under argon atmosphere. Yields were determined by <sup>1</sup>H NMR with 1,3,5-trimethoxybenzene as internal standard.

**Table S4. Investigation of temperature and amount of 2a**

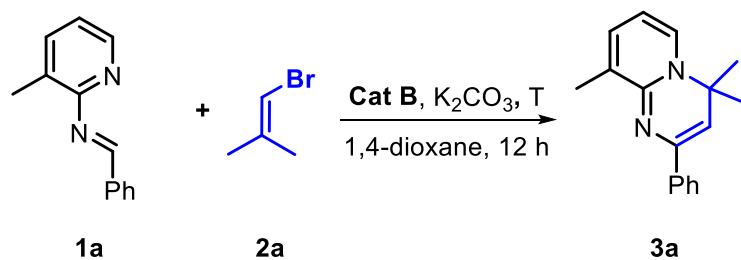

| Entry                | T/°C       | Yield/%   |
|----------------------|------------|-----------|
| 1                    | 110        | 51        |
| 2                    | 120        | 60        |
| 3                    | 130        | 89        |
| 4                    | 140        | 88        |
| <b>5<sup>b</sup></b> | <b>130</b> | <b>96</b> |

|                  |     |    |
|------------------|-----|----|
| 6 <sup>b,c</sup> | 130 | 89 |
| 7 <sup>b,d</sup> | 130 | 95 |

<sup>a</sup>General conditions: **1a** (0.1 mmol), **2a** (0.2 mmol), **Cat B** (3 mol%), base (0.15 mmol) and 1,4-dioxane (1.0 mL) at T °C for 12 h under argon atmosphere. <sup>b</sup>**Cat B** (5 mol%). <sup>c</sup>**2a** (0.15 mmol), <sup>d</sup>**2a** (0.25 mmol). Yields were determined by <sup>1</sup>H NMR with 1,3,5-trimethoxybenzene as internal standard.

**Table S5. Investigation of the amount of base**

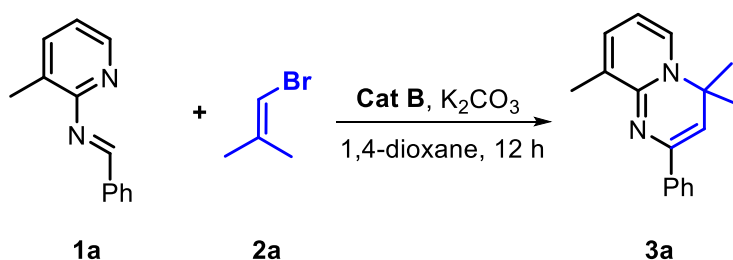

| Entry | K <sub>2</sub> CO <sub>3</sub> (x equiv) | Yield/%   |
|-------|------------------------------------------|-----------|
| 1     | 1.0                                      | 88        |
| 2     | <b>1.5</b>                               | <b>96</b> |
| 3     | 2.0                                      | 96        |

<sup>a</sup>General conditions: **1a** (0.1 mmol), **2a** (0.2 mmol), **Cat B** (5 mol%), K<sub>2</sub>CO<sub>3</sub> (x equiv) and 1,4-dioxane (1.0 mL) at 130 °C for 12 h under argon atmosphere. Yields were determined by <sup>1</sup>H NMR with 1,3,5-trimethoxybenzene as internal standard.

### 3.2 Substrate expansion and product identification

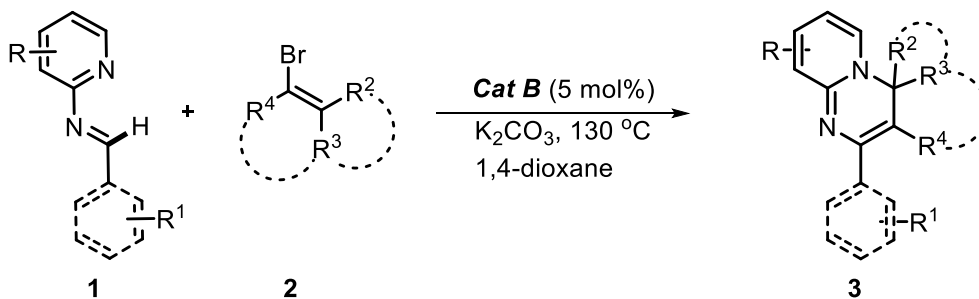

In glove box, to dry 1,4-dioxane (2 mL) were added substrate **1** (0.2 mmol, 1.0 equiv), substrate **2** (0.4 mmol, 2.0 equiv), K<sub>2</sub>CO<sub>3</sub> (0.3 mmol, 1.5 equiv) and **Cat. B** (5 mol%) in a 10 mL oven-dried Schlenk tube. Then the tube was sealed and the mixture was stirred at 130 °C for 24 h. After the reaction was completed, the resulting mixture was concentrated in vacuo, and the residual was purified by silica gel column chromatography to give the product **3**.

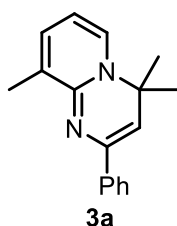

#### 4,4,9-trimethyl-2-phenyl-4H-pyrido[1,2-a]pyrimidine (3a)

Obtained as yellow liquid (44.9 mg, 90% yield);  $^1\text{H NMR}$  (600 MHz,  $\text{CDCl}_3$ )  $\delta$  7.87 (d,  $J = 7.9$  Hz, 2H), 7.33 (t,  $J = 7.6$  Hz, 2H), 7.25 (dd,  $J = 14.0, 6.6$  Hz, 1H), 7.16 (d,  $J = 7.1$  Hz, 1H), 6.86 (d,  $J = 6.3$  Hz, 1H), 6.04 (t,  $J = 6.8$  Hz, 1H), 5.09 (s, 1H), 2.24 (s, 3H), 1.61 (s, 6H);  $^{13}\text{C NMR}$  (150 MHz,  $\text{CDCl}_3$ )  $\delta$  151.0, 141.5, 139.1, 131.7, 131.7, 129.0, 127.9, 127.4, 125.5, 107.9, 102.9, 59.0, 31.2, 18.6.

**HRMS (ESI)** calcd for  $[\text{M}+\text{H}]^+$   $\text{C}_{17}\text{H}_{19}\text{N}_2$ ,  $m/z$ : 251.1543, found: 251.1548, Error -2.1 ppm.

**IR (KBr)**: 2972, 1626, 1519, 1389, 742, 696  $\text{cm}^{-1}$ .

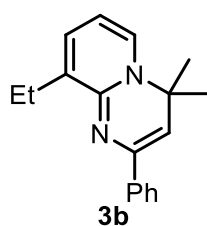

#### 9-ethyl-4,4-dimethyl-2-phenyl-4H-pyrido[1,2-a]pyrimidine (3b)

Obtained as yellow liquid (48.2 mg, 91% yield);  $^1\text{H NMR}$  (400 MHz,  $\text{CDCl}_3$ )  $\delta$  7.92 – 7.81 (m, 2H), 7.37 – 7.30 (m, 2H), 7.27 – 7.23 (m, 1H), 7.15 (d,  $J = 6.6$  Hz, 1H), 6.84 (dd,  $J = 6.5, 1.2$  Hz, 1H), 6.07 (t,  $J = 6.9$  Hz, 1H), 5.10 (s, 1H), 2.71 (q,  $J = 7.4$  Hz, 2H), 1.60 (s, 6H), 1.25 (t,  $J = 7.4$  Hz, 3H);  $^{13}\text{C NMR}$  (100 MHz,  $\text{CDCl}_3$ )  $\delta$  150.4, 141.5, 139.2, 136.9, 129.4, 128.7, 127.9, 127.4, 125.5, 107.9, 102.8, 59.0, 31.2, 24.3, 12.4.

**HRMS (ESI)** calcd for  $[\text{M}+\text{H}]^+$   $\text{C}_{18}\text{H}_{21}\text{N}_2$ ,  $m/z$ : 265.1699, found: 265.1702, Error -0.9 ppm.

**IR (KBr)**: 2967, 1634, 1515, 1448, 749, 669  $\text{cm}^{-1}$ .

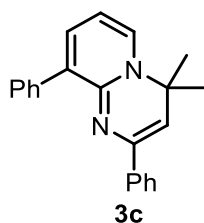

#### 4,4-dimethyl-2,9-diphenyl-4H-pyrido[1,2-a]pyrimidine (3c)

Obtained as yellow liquid (42.3 mg, 68% yield) at 150 °C;  $^1\text{H NMR}$  (600 MHz,  $\text{CDCl}_3$ )  $\delta$  7.73 (dd,  $J = 6.7, 4.4$  Hz, 4H), 7.39 (t,  $J = 7.5$  Hz, 2H), 7.32 (t,  $J = 7.3$  Hz, 1H), 7.30 – 7.23 (m, 3H), 7.23 – 7.18 (m, 1H), 6.99 (d,  $J = 6.1$  Hz, 1H), 6.15 (t,  $J = 6.8$  Hz, 1H), 5.15 (s, 1H), 1.65 (s, 6H);  $^{13}\text{C NMR}$  (150 MHz,  $\text{CDCl}_3$ )  $\delta$  149.8, 141.4, 138.8, 138.3, 134.4, 133.4, 130.8, 129.60, 127.9, 127.5, 127.4, 127.3, 125.4, 108.2, 102.9, 59.3, 31.2.

**HRMS (ESI)** calcd for  $[\text{M}+\text{H}]^+$   $\text{C}_{22}\text{H}_{21}\text{N}_2$ ,  $m/z$ : 313.1699, found: 313.1698, Error 0.3 ppm.

**IR (KBr)**: 2972, 1628, 1518, 757, 696  $\text{cm}^{-1}$ .

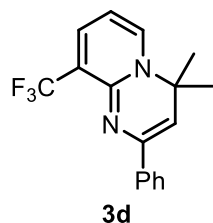

**4,4-dimethyl-2-phenyl-9-(trifluoromethyl)-4H-pyrido[1,2-a]pyrimidine (3d)**

Obtained as yellow liquid (40.6 mg, 67% yield) at 150 °C; <sup>1</sup>H NMR (600 MHz, CDCl<sub>3</sub>) δ 7.88 – 7.80 (m, 2H), 7.33 (dd, *J* = 12.6, 4.9 Hz, 4H), 7.26 (t, *J* = 7.3 Hz, 1H), 6.04 (t, *J* = 7.0 Hz, 1H), 5.17 (s, 1H), 1.62 (s, 6H); <sup>13</sup>C NMR (150 MHz, CDCl<sub>3</sub>) δ 146.3, 140.5, 138.1, 135.4, 134.0 (q, *J* = 5.5 Hz), 128.0, 127.8, 125.5, 122.8 (q, *J* = 270.8 Hz), 122.0 (q, *J* = 30.0 Hz), 105.6, 103.9, 59.4, 31.1; <sup>19</sup>F NMR (376 MHz, CDCl<sub>3</sub>) δ -66.1.

**HRMS (ESI)** calcd for [M+H]<sup>+</sup> C<sub>17</sub>H<sub>16</sub>N<sub>2</sub>F<sub>3</sub>, *m/z*: 305.1260, found: 305.1266, Error-1.9 ppm.

**IR (KBr)**: 1646, 1541, 1309, 1137, 1050, 749 cm<sup>-1</sup>.

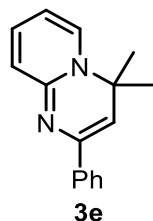

**4,4-dimethyl-2-phenyl-4H-pyrido[1,2-a]pyrimidine (3e)**

Obtained as yellow liquid (31.3 mg, 66% yield) at 150 °C; <sup>1</sup>H NMR (400 MHz, CDCl<sub>3</sub>) δ 7.79 – 7.70 (m, 2H), 7.36 – 7.30 (m, 2H), 7.28 – 7.23 (m, 1H), 7.22 (dd, *J* = 7.1, 0.9 Hz, 1H), 6.94 – 6.90 (m, 1H), 6.70 (dd, *J* = 9.1, 0.8 Hz, 1H), 6.17 – 6.02 (m, 1H), 5.00 (s, 1H), 1.64 (s, 6H); <sup>13</sup>C NMR (100 MHz, CDCl<sub>3</sub>) δ 151.5, 142.2, 139.1, 133.5, 131.4, 128.0, 127.5, 125.6, 124.3, 108.8, 103.3, 59.0, 31.3.

**HRMS (ESI)** calcd for [M+H]<sup>+</sup> C<sub>16</sub>H<sub>17</sub>N<sub>2</sub>, *m/z*: 237.1386, found: 237.1388, Error -0.8 ppm.

**IR (KBr)**: 2971, 1641, 1527, 1447, 1385, 755 cm<sup>-1</sup>.

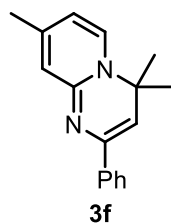

**4,4,8-trimethyl-2-phenyl-4H-pyrido[1,2-a]pyrimidine (3f)**

Obtained as yellow liquid (37.5 mg, 75% yield); <sup>1</sup>H NMR (400 MHz, CDCl<sub>3</sub>) δ 7.76 (d, *J* = 7.4 Hz, 2H), 7.33 (t, *J* = 7.4 Hz, 2H), 7.26 (d, *J* = 7.0 Hz, 1H), 7.15 (d, *J* = 7.2 Hz, 1H), 6.56 (s, 1H), 5.98 (d, *J* = 7.1 Hz, 1H), 4.99 (s, 1H), 2.10 (s, 3H), 1.62 (s, 6H); <sup>13</sup>C NMR (100 MHz, CDCl<sub>3</sub>) δ 151.5, 144.8, 142.1, 139.1, 130.7, 127.9, 127.4, 125.5, 121.9, 111.6, 102.8, 58.8, 31.3, 20.7.

**HRMS (ESI)** calcd for [M+H]<sup>+</sup> C<sub>17</sub>H<sub>19</sub>N<sub>2</sub>, *m/z*: 251.1543, found: 251.1543, Error 0 ppm.

**IR (KBr)**: 2971, 1652, 1520, 1357, 770, 731 cm<sup>-1</sup>.

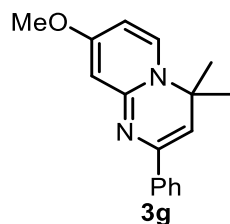

**8-methoxy-4,4-dimethyl-2-phenyl-4H-pyrido[1,2-a]pyrimidine (3g)**

Obtained as yellow liquid (42.9 mg, 81% yield); <sup>1</sup>H NMR (600 MHz, CDCl<sub>3</sub>) δ 7.75 (d, *J* = 7.5 Hz, 2H), 7.33 (t, *J* = 7.6 Hz, 2H), 7.26 (d, *J* = 7.3 Hz, 1H), 7.15 (d, *J* = 7.8 Hz, 1H), 6.04 (d, *J* = 2.7 Hz, 1H), 5.86 (dd, *J* = 7.7, 2.8 Hz, 1H), 4.99 (s, 1H), 3.76 (s, 3H), 1.60 (s, 6H); <sup>13</sup>C NMR (150 MHz, CDCl<sub>3</sub>) δ 163.1, 153.2, 142.2, 139.4, 132.5, 128.0, 127.3, 125.5, 103.9, 102.6, 99.1, 58.6, 55.3, 31.3.

**HRMS (ESI)** calcd for [M+H]<sup>+</sup> C<sub>17</sub>H<sub>19</sub>N<sub>2</sub>O, *m/z*: 267.1492, found: 267.1503, Error -4.3 ppm.

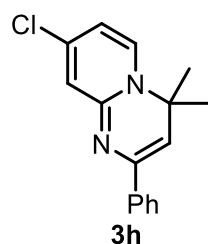

**8-chloro-4,4-dimethyl-2-phenyl-4H-pyrido[1,2-a]pyrimidine (3h)**

Obtained as yellow liquid (22.2 mg, 41% yield) at 150 °C; <sup>1</sup>H NMR (600 MHz, CDCl<sub>3</sub>) δ 7.73 (d, *J* = 7.4 Hz, 2H), 7.34 (t, *J* = 7.5 Hz, 2H), 7.28 (d, *J* = 7.2 Hz, 1H), 7.14 (d, *J* = 7.6 Hz, 1H), 6.71 (d, *J* = 2.2 Hz, 1H), 6.06 (dd, *J* = 7.5, 2.3 Hz, 1H), 5.04 (s, 1H), 1.63 (s, 6H); <sup>13</sup>C NMR (150 MHz, CDCl<sub>3</sub>) δ 150.9, 141.9, 140.2, 138.7, 132.4, 128.1, 127.7, 125.5, 122.3, 110.0, 103.9, 59.1, 31.3.

**HRMS (ESI)** calcd for [M+H]<sup>+</sup> C<sub>16</sub>H<sub>16</sub>ClN<sub>2</sub>, *m/z*: 271.0997, found: 271.1002, Error -2.1 ppm.

**IR (KBr)**: 2927, 1631, 1531, 1349, 1085, 762 cm<sup>-1</sup>.

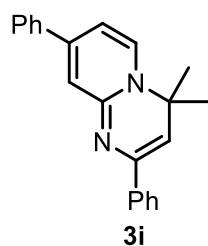

**4,4-dimethyl-2,8-diphenyl-4H-pyrido[1,2-a]pyrimidine (3i)**

Obtained as yellow solid (27.5 mg, 44% yield, m.p. = 144-146 °C); <sup>1</sup>H NMR (600 MHz, CDCl<sub>3</sub>) δ 7.77 (d, *J* = 7.7 Hz, 2H), 7.46 – 7.38 (m, 5H), 7.34 (dd, *J* = 16.2, 8.5 Hz, 3H), 7.27 (dd, *J* = 15.2, 7.6 Hz, 2H), 6.81 (d, *J* = 9.3 Hz, 1H), 5.06 (s, 1H), 1.71 (s, 6H); <sup>13</sup>C NMR (150 MHz, CDCl<sub>3</sub>) δ 150.5, 142.3, 139.1, 137.0, 133.4, 129.0, 129.0, 128.1, 127.6, 127.2, 125.6, 125.3, 124.6, 122.6, 103.6, 59.5, 31.5.

**HRMS (ESI)** calcd for [M+H]<sup>+</sup> C<sub>22</sub>H<sub>21</sub>N<sub>2</sub>, *m/z*: 313.1699, found: 313.1706, Error -2.1 ppm.

**IR (KBr)**: 1647, 1537, 1495, 1428, 756, 696 cm<sup>-1</sup>.

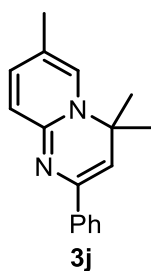

**4,4,7-trimethyl-2-phenyl-4H-pyrido[1,2-a]pyrimidine (3j)**

Obtained as yellow liquid (35.7 mg, 71% yield);  $^1\text{H NMR}$  (600 MHz,  $\text{CDCl}_3$ )  $\delta$  7.75 (d,  $J = 7.6$  Hz, 2H), 7.33 (t,  $J = 7.4$  Hz, 2H), 7.26 (d,  $J = 6.7$  Hz, 1H), 7.00 (s, 1H), 6.82 (d,  $J = 9.0$  Hz, 1H), 6.69 (d,  $J = 9.2$  Hz, 1H), 4.97 (s, 1H), 2.02 (s, 3H), 1.63 (s, 6H);  $^{13}\text{C NMR}$  (150 MHz,  $\text{CDCl}_3$ )  $\delta$  150.9, 142.3, 139.2, 136.4, 128.5, 128.0, 127.4, 125.5, 124.1, 117.8, 102.8, 59.0, 31.4, 17.6.

**HRMS (ESI)** calcd for  $[\text{M}+\text{H}]^+$   $\text{C}_{17}\text{H}_{19}\text{N}_2$ ,  $m/z$ : 251.1534, found: 251.1543, Error -3.6 ppm.

**IR (KBr)**: 2972, 1690, 1527, 1433, 726, 696  $\text{cm}^{-1}$ .

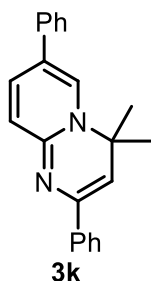

**4,4-dimethyl-2,7-diphenyl-4H-pyrido[1,2-a]pyrimidine (3k)**

Obtained as red solid (34.6 mg, 55% yield, m.p. = 144-146  $^{\circ}\text{C}$ );  $^1\text{H NMR}$  (400 MHz,  $\text{CDCl}_3$ )  $\delta$  7.82 – 7.74 (m, 2H), 7.62 – 7.55 (m, 2H), 7.47 – 7.38 (m, 3H), 7.35 (t,  $J = 7.4$  Hz, 2H), 7.31 – 7.24 (m, 2H), 6.97 (d,  $J = 2.0$  Hz, 1H), 6.39 (dd,  $J = 7.4, 2.1$  Hz, 1H), 5.03 (s, 1H), 1.67 (s, 6H);  $^{13}\text{C NMR}$  (100 MHz,  $\text{CDCl}_3$ )  $\delta$  151.7, 145.3, 142.5, 139.2, 137.2, 131.7, 129.0, 128.8, 128.0, 127.5, 126.2, 125.6, 120.7, 108.1, 103.3, 58.9, 31.4.

**HRMS (ESI)** calcd for  $[\text{M}+\text{H}]^+$   $\text{C}_{22}\text{H}_{21}\text{N}_2$ ,  $m/z$ : 313.1699, found: 313.1704, Error -1.5 ppm.

**IR (KBr)**: 2970, 1642, 1520, 1356, 758, 695  $\text{cm}^{-1}$ .

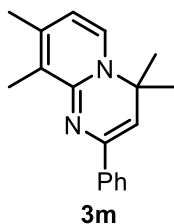

**4,4,8,9-tetramethyl-2-phenyl-4H-pyrido[1,2-a]pyrimidine (3m)**

Obtained as yellow liquid (48.1 mg, 91% yield);  $^1\text{H NMR}$  (600 MHz,  $\text{CDCl}_3$ )  $\delta$  7.88 (d,  $J = 7.5$  Hz, 2H), 7.34 (t,  $J = 7.6$  Hz, 2H), 7.25 (t,  $J = 7.3$  Hz, 1H), 7.11 (d,  $J = 7.2$  Hz, 1H), 5.99 (d,  $J = 7.2$  Hz, 1H), 5.08 (s, 1H), 2.24 (s, 3H), 2.12 (s, 3H), 1.61 (s, 6H);  $^{13}\text{C NMR}$  (150 MHz,  $\text{CDCl}_3$ )  $\delta$  151.0, 141.9, 140.1, 139.4, 127.9, 127.7, 127.5, 127.4, 125.6, 111.8, 102.2, 59.0, 31.1, 19.6, 13.6.

**HRMS (ESI)** calcd for  $[\text{M}+\text{H}]^+$   $\text{C}_{18}\text{H}_{21}\text{N}_2$ ,  $m/z$ : 265.1699, found: 265.1709, Error -3.8 ppm.

**IR (KBr)**: 2973, 1689, 1551, 1515, 1447, 736  $\text{cm}^{-1}$ .

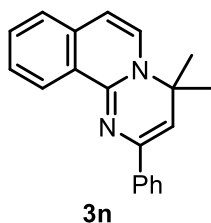

**4,4-dimethyl-2-phenyl-4H-pyrimido[2,1-a]isoquinoline (3n)**

Obtained as yellow solid (27.9 mg, 49% yield, m.p. = 95-97 °C); <sup>1</sup>H NMR (600 MHz, CDCl<sub>3</sub>) δ 8.75 (d, *J* = 8.1 Hz, 1H), 7.94 (d, *J* = 7.6 Hz, 2H), 7.48 (t, *J* = 7.4 Hz, 1H), 7.41 (d, *J* = 7.7 Hz, 1H), 7.38 (t, *J* = 7.7 Hz, 2H), 7.30 (t, *J* = 8.6 Hz, 2H), 7.05 (d, *J* = 7.6 Hz, 1H), 6.36 (d, *J* = 7.6 Hz, 1H), 5.27 (s, 1H), 1.64 (s, 6H); <sup>13</sup>C NMR (150 MHz, CDCl<sub>3</sub>) δ 148.9, 140.6, 138.9, 134.1, 130.9, 128.0, 127.6, 127.5, 127.1, 127.0, 126.6, 125.5, 125.2, 107.8, 106.0, 58.4, 31.4.

**HRMS (ESI)** calcd for [M+H]<sup>+</sup> C<sub>20</sub>H<sub>19</sub>N<sub>2</sub>, *m/z*: 287.1543, found: 287.1541, Error 0.8 ppm.

**IR (KBr)**: 2970, 1636, 1561, 1538, 1345, 781, 677 cm<sup>-1</sup>.

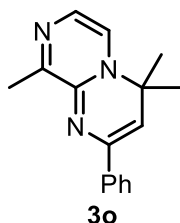

**4,4,9-trimethyl-2-phenyl-4H-pyrazino[1,2-a]pyrimidine (3o)**

Obtained as yellow liquid (27.2 mg, 54% yield); <sup>1</sup>H NMR (600 MHz, CDCl<sub>3</sub>) δ 7.85 – 7.78 (m, 2H), 7.36 (t, *J* = 7.6 Hz, 2H), 7.32 – 7.27 (m, 1H), 7.06 (d, *J* = 4.8 Hz, 1H), 6.88 (d, *J* = 4.8 Hz, 1H), 5.17 (s, 1H), 2.52 (s, 3H), 1.61 (s, 6H); <sup>13</sup>C NMR (150 MHz, CDCl<sub>3</sub>) δ 159.6, 144.3, 141.3, 138.2, 128.1, 127.9, 125.4, 124.2, 120.7, 105.4, 58.6, 30.8, 21.8.

**HRMS (ESI)** calcd for [M+H]<sup>+</sup> C<sub>16</sub>H<sub>18</sub>N<sub>3</sub>, *m/z*: 252.1495, found: 252.1496, Error -0.3 ppm.

**IR (KBr)**: 2972, 1537, 1370, 1182, 745, 697 cm<sup>-1</sup>.

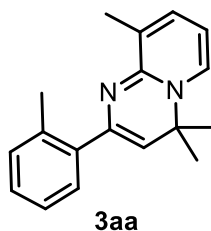

**4,4,9-trimethyl-2-(o-tolyl)-4H-pyrido[1,2-a]pyrimidine (3aa)**

Obtained as yellow liquid (51.9 mg, 98% yield); <sup>1</sup>H NMR (600 MHz, CDCl<sub>3</sub>) δ 7.40 (d, *J* = 6.5 Hz, 1H), 7.19 – 7.11 (m, 4H), 6.82 (d, *J* = 6.4 Hz, 1H), 6.03 (t, *J* = 6.8 Hz, 1H), 4.64 (s, 1H), 2.46 (s, 3H), 2.13 (s, 3H), 1.61 (s, 6H); <sup>13</sup>C NMR (150 MHz, CDCl<sub>3</sub>) δ 150.3, 144.5, 140.6, 136.2, 131.5, 131.4, 130.3, 129.1, 128.8, 127.1, 125.3, 107.7, 106.9, 58.9, 31.2, 20.6, 18.7.

**HRMS (ESI)** calcd for [M+H]<sup>+</sup> C<sub>18</sub>H<sub>21</sub>N<sub>2</sub>, *m/z*: 265.1699, found: 265.1696, Error 1.1 ppm.

**IR (KBr)**: 2971, 1637, 1514, 1459, 1081, 744 cm<sup>-1</sup>.

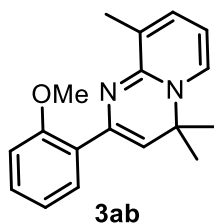

**2-(2-methoxyphenyl)-4,4,9-trimethyl-4H-pyrido[1,2-a]pyrimidine (3ab)**

Obtained as yellow liquid (30.4mg, 54% yield); <sup>1</sup>H NMR (600 MHz, CDCl<sub>3</sub>) δ 8.07 (dd, *J* = 7.7, 1.3 Hz, 1H), 7.23 – 7.18 (m, 1H), 7.17 (d, *J* = 7.1 Hz, 1H), 7.00 (t, *J* = 7.5 Hz, 1H), 6.90 (d, *J* = 8.2 Hz, 1H), 6.82 (d, *J* = 6.4 Hz, 1H), 6.01 (t, *J* = 6.8 Hz, 1H), 5.50 (s, 1H), 3.84 (s, 3H), 2.20 (s, 3H), 1.62 (s, 6H); <sup>13</sup>C NMR (150 MHz, CDCl<sub>3</sub>) δ 157.6, 150.5, 138.1, 131.5, 131.2, 129.8, 129.0, 128.2, 128.1, 120.7, 111.7, 108.7, 107.5, 58.6, 55.8, 31.0, 18.7.

**HRMS (ESI)** calcd for [M+H]<sup>+</sup> C<sub>18</sub>H<sub>21</sub>N<sub>2</sub>O, *m/z*: 281.1648, found: 281.1649, Error -0.1 ppm.

**IR (KBr)**: 2971, 1638, 1525, 1488, 1238, 756 cm<sup>-1</sup>.

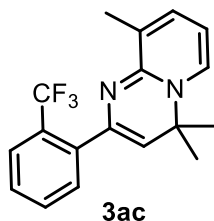

**4,4,9-trimethyl-2-(2-(trifluoromethyl)phenyl)-4H-pyrido[1,2-a]pyrimidine (3ac)**

Obtained as yellow liquid (47.5mg, 75% yield); <sup>1</sup>H NMR (400 MHz, CDCl<sub>3</sub>) δ 7.64 (d, *J* = 7.9 Hz, 1H), 7.55 (d, *J* = 7.6 Hz, 1H), 7.47 (t, *J* = 7.5 Hz, 1H), 7.35 (t, *J* = 7.6 Hz, 1H), 7.18 (d, *J* = 7.1 Hz, 1H), 6.85 (d, *J* = 6.5 Hz, 1H), 6.07 (t, *J* = 6.8 Hz, 1H), 4.66 (s, 1H), 2.12 (s, 3H), 1.61 (s, 6H); <sup>13</sup>C NMR (100 MHz, CDCl<sub>3</sub>) δ 150.6, 142.7, 140.9, 131.8, 131.5, 131.2, 131.0, 129.1, 128.2 (q, *J* = 29.9 Hz), 127.2, 126.2 (q, *J* = 5.4 Hz), 124.5 (q, *J* = 272.3 Hz), 108.1, 106.8 (q, *J* = 1.9 Hz), 59.1, 30.7, 18.7; <sup>19</sup>F NMR (376 MHz, CDCl<sub>3</sub>) δ -56.7.

**HRMS (ESI)** calcd for [M+H]<sup>+</sup> C<sub>18</sub>H<sub>18</sub>F<sub>3</sub>N<sub>2</sub>, *m/z*: 319.1417, found: 319.1414, Error 0.9 ppm.

**IR (KBr)**: 2975, 1637, 1513, 1313, 1165, 1130, 769 cm<sup>-1</sup>.

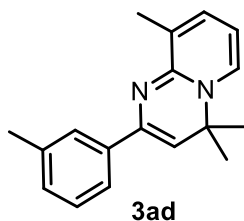

**4,4,9-trimethyl-2-(m-tolyl)-4H-pyrido[1,2-a]pyrimidine (3ad)**

Obtained as yellow liquid (50.1 mg, 95% yield); <sup>1</sup>H NMR (600 MHz, CDCl<sub>3</sub>) δ 7.68 (s, 1H), 7.66 (d, *J* = 7.8 Hz, 1H), 7.22 (t, *J* = 7.6 Hz, 1H), 7.15 (d, *J* = 7.0 Hz, 1H), 7.07 (d, *J* = 7.4 Hz, 1H), 6.84 (d, *J* = 6.4 Hz, 1H), 6.02 (t, *J* = 6.8 Hz, 1H), 5.08 (s, 1H), 2.37 (s, 3H), 2.24 (s, 3H), 1.60 (s, 6H); <sup>13</sup>C NMR (150 MHz, CDCl<sub>3</sub>) δ 150.9, 141.6, 139.1, 137.3, 131.6, 131.6, 129.0, 128.2, 127.8, 126.2, 122.6, 107.8, 102.9, 58.9, 31.1, 21.5, 18.6.

**HRMS (ESI)** calcd for [M+H]<sup>+</sup> C<sub>18</sub>H<sub>21</sub>N<sub>2</sub>, *m/z*: 265.1699, found: 265.1696, Error 1.1 ppm.

**IR (KBr)**: 2971, 2910, 1519, 1176, 1083, 745 cm<sup>-1</sup>.



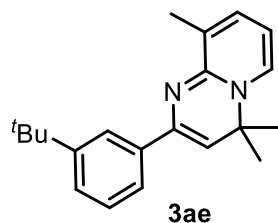

**2-(3-(tert-butyl)phenyl)-4,4,9-trimethyl-4H-pyrido[1,2-a]pyrimidine (3ae)**

Obtained as yellow liquid (53.9 mg, 88% yield); <sup>1</sup>H NMR (600 MHz, CDCl<sub>3</sub>) δ 7.98 (t, *J* = 1.7 Hz, 1H), 7.66 – 7.59 (m, 1H), 7.32 – 7.29 (m, 1H), 7.27 (t, *J* = 7.6 Hz, 1H), 7.17 (d, *J* = 7.0 Hz, 1H), 6.86 (d, *J* = 6.4 Hz, 1H), 6.03 (t, *J* = 6.8 Hz, 1H), 5.08 (s, 1H), 2.25 (s, 3H), 1.61 (s, 6H), 1.35 (s, 9H); <sup>13</sup>C NMR (150 MHz, CDCl<sub>3</sub>) δ 150.9, 150.5, 141.9, 138.7, 131.6, 131.6, 129.0, 127.6, 124.5, 122.7, 122.6, 107.8, 102.7, 59.0, 34.6, 31.3, 31.1, 18.6.

**HRMS (ESI)** calcd for [M+H]<sup>+</sup> C<sub>21</sub>H<sub>27</sub>N<sub>2</sub>, *m/z*: 307.2169, found: 307.2166, Error 1.0 ppm.

**IR (KBr)**: 2963, 1638, 1521, 1489, 744 cm<sup>-1</sup>.

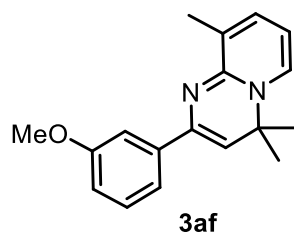

**2-(3-methoxyphenyl)-4,4,9-trimethyl-4H-pyrido[1,2-a]pyrimidine (3af)**

Obtained as yellow liquid (49.3 mg, 88% yield); <sup>1</sup>H NMR (600 MHz, CDCl<sub>3</sub>) δ 7.54 – 7.50 (m, 1H), 7.42 (d, *J* = 7.7 Hz, 1H), 7.24 (t, *J* = 7.9 Hz, 1H), 7.16 (d, *J* = 7.1 Hz, 1H), 6.86 (d, *J* = 6.4 Hz, 1H), 6.82 (dd, *J* = 8.1, 2.5 Hz, 1H), 6.04 (t, *J* = 6.8 Hz, 1H), 5.10 (s, 1H), 3.83 (s, 3H), 2.23 (s, 3H), 1.61 (s, 6H); <sup>13</sup>C NMR (150 MHz, CDCl<sub>3</sub>) δ 159.5, 150.9, 141.3, 140.7, 131.7, 131.6, 129.0, 128.8, 117.9, 113.2, 111.0, 107.9, 103.1, 59.0, 55.1, 31.1, 18.6.

**HRMS (ESI)** calcd for [M+H]<sup>+</sup> C<sub>18</sub>H<sub>21</sub>N<sub>2</sub>O, *m/z*: 281.1648, found: 281.1652, Error -1.4 ppm.

**IR (KBr)**: 2970, 1638, 1519, 1489, 1271, 1045, 746 cm<sup>-1</sup>.

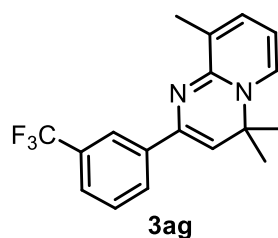

**4,4,9-trimethyl-2-(3-(trifluoromethyl)phenyl)-4H-pyrido[1,2-a]pyrimidine (3ag)**

Obtained as yellow liquid (54.3 mg, 85% yield); <sup>1</sup>H NMR (600 MHz, CDCl<sub>3</sub>) δ 8.14 (s, 1H), 8.05 (d, *J* = 7.8 Hz, 1H), 7.51 (d, *J* = 7.7 Hz, 1H), 7.44 (t, *J* = 7.8 Hz, 1H), 7.19 (d, *J* = 7.1 Hz, 1H), 6.89 (d, *J* = 6.5 Hz, 1H), 6.08 (t, *J* = 6.8 Hz, 1H), 5.14 (s, 1H), 2.24 (s, 3H), 1.63 (s, 6H); <sup>13</sup>C NMR (150 MHz, CDCl<sub>3</sub>) δ 151.2, 140.6, 140.0, 132.1, 131.6, 130.2 (q, *J* = 31.6 Hz), 129.0, 128.8, 128.3, 124.4 (q, *J* = 270.6 Hz), 124.0 (q, *J* = 3.8 Hz), 122.4 (q, *J* = 4.0 Hz), 108.4, 103.6, 59.1, 31.1, 18.6; <sup>19</sup>F NMR (565 MHz, CDCl<sub>3</sub>) δ -62.4.

**HRMS (ESI)** calcd for [M+H]<sup>+</sup> C<sub>18</sub>H<sub>18</sub>F<sub>3</sub>N<sub>2</sub>, *m/z*: 319.1417, found: 319.1424, Error -2.5 ppm.

**IR (KBr)**: 3074, 1698, 1519, 1518, 1330, 1124, 700 cm<sup>-1</sup>.

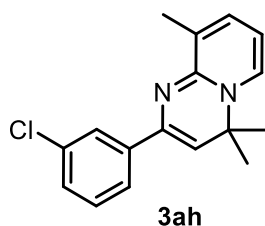

**2-(3-chlorophenyl)-4,4,9-trimethyl-4H-pyrido[1,2-a]pyrimidine (3ah)**

Obtained as yellow liquid (53.8 mg, 94% yield);  $^1\text{H NMR}$  (600 MHz,  $\text{CDCl}_3$ )  $\delta$  7.86 (s, 1H), 7.73 (d,  $J = 7.5$  Hz, 1H), 7.24 (dt,  $J = 14.3, 7.8$  Hz, 2H), 7.18 (d,  $J = 7.1$  Hz, 1H), 6.88 (d,  $J = 6.3$  Hz, 1H), 6.07 (t,  $J = 6.8$  Hz, 1H), 5.09 (s, 1H), 2.23 (s, 3H), 1.62 (s, 6H);  $^{13}\text{C NMR}$  (150 MHz,  $\text{CDCl}_3$ )  $\delta$  151.1, 141.2, 140.6, 134.0, 132.0, 131.7, 129.1, 129.0, 127.4, 125.8, 123.6, 108.2, 103.5, 59.1, 31.1, 18.6.

**HRMS (ESI)** calcd for  $[\text{M}+\text{H}]^+$   $\text{C}_{17}\text{H}_{18}\text{ClN}_2$ ,  $m/z$ : 285.1153, found: 285.1157, Error -1.4 ppm.

**IR (KBr)**: 2974, 1639, 1517, 1374, 1082, 741  $\text{cm}^{-1}$ .

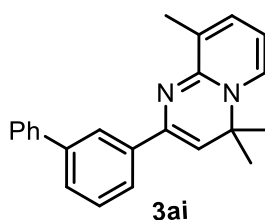

**2-([1,1'-biphenyl]-3-yl)-4,4,9-trimethyl-4H-pyrido[1,2-a]pyrimidine (3ai)**

Obtained as yellow liquid (52.3 mg, 80% yield);  $^1\text{H NMR}$  (400 MHz,  $\text{CDCl}_3$ )  $\delta$  8.09 (s, 1H), 7.85 (d,  $J = 7.7$  Hz, 1H), 7.65 (d,  $J = 7.3$  Hz, 2H), 7.50 (d,  $J = 7.7$  Hz, 1H), 7.43 (dt,  $J = 9.7, 7.6$  Hz, 3H), 7.33 (t,  $J = 7.4$  Hz, 1H), 7.20 (d,  $J = 7.0$  Hz, 1H), 6.88 (d,  $J = 6.5$  Hz, 1H), 6.07 (t,  $J = 6.8$  Hz, 1H), 5.15 (s, 1H), 2.25 (s, 3H), 1.64 (s, 6H);  $^{13}\text{C NMR}$  (100 MHz,  $\text{CDCl}_3$ )  $\delta$  151.1, 141.8, 141.7, 140.9, 139.7, 131.8, 129.1, 128.6, 128.4, 127.2, 127.0, 126.4, 124.7, 124.6, 108.0, 103.2, 59.1, 31.2, 18.7.

**HRMS (ESI)** calcd for  $[\text{M}+\text{H}]^+$   $\text{C}_{23}\text{H}_{23}\text{N}_2$ ,  $m/z$ : 327.1856, found: 327.1856, Error 0 ppm.

**IR (KBr)**: 2972, 1638, 1518, 759, 745, 700  $\text{cm}^{-1}$ .

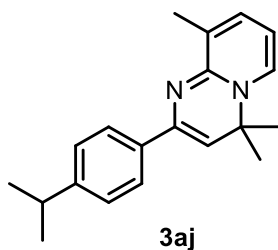

**2-(4-isopropylphenyl)-4,4,9-trimethyl-4H-pyrido[1,2-a]pyrimidine (3aj)**

Obtained as yellow liquid (55.7 mg, 95% yield);  $^1\text{H NMR}$  (600 MHz,  $\text{CDCl}_3$ )  $\delta$  7.78 (d,  $J = 8.0$  Hz, 2H), 7.19 (d,  $J = 8.0$  Hz, 2H), 7.15 (d,  $J = 7.1$  Hz, 1H), 6.83 (d,  $J = 6.3$  Hz, 1H), 6.01 (t,  $J = 6.8$  Hz, 1H), 5.04 (s, 1H), 2.95 – 2.85 (m, 1H), 2.22 (s, 3H), 1.59 (s, 6H), 1.24 (d,  $J = 6.9$  Hz, 6H);  $^{13}\text{C NMR}$  (150 MHz,  $\text{CDCl}_3$ )  $\delta$  150.9, 148.1, 141.6, 136.9, 131.7, 131.5, 129.0, 126.0, 125.5, 107.7, 102.4, 58.9, 33.8, 31.2, 24.0, 18.6.

**HRMS (ESI)** calcd for  $[\text{M}+\text{H}]^+$   $\text{C}_{20}\text{H}_{25}\text{N}_2$ ,  $m/z$ : 293.2012, found: 293.2013, Error -0.2 ppm.

**IR (KBr)**: 2961, 1638, 1522, 1388, 1178, 774  $\text{cm}^{-1}$ .

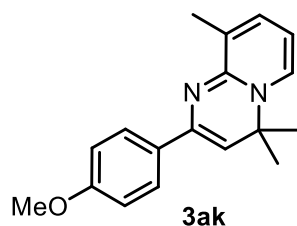

**2-(4-methoxyphenyl)-4,4,9-trimethyl-4H-pyrido[1,2-a]pyrimidine (3ak)**

Obtained as yellow liquid (55.4 mg, 99% yield); <sup>1</sup>H NMR (600 MHz, CDCl<sub>3</sub>) δ 7.81 (d, *J* = 8.8 Hz, 2H), 7.16 (d, *J* = 7.1 Hz, 1H), 6.87 (d, *J* = 8.8 Hz, 2H), 6.85 (d, *J* = 6.4 Hz, 1H), 6.03 (t, *J* = 6.8 Hz, 1H), 5.00 (s, 1H), 3.80 (s, 3H), 2.23 (s, 3H), 1.60 (s, 6H); <sup>13</sup>C NMR (100 MHz, CDCl<sub>3</sub>) δ 159.2, 150.9, 141.1, 131.9, 131.6, 129.0, 126.7, 113.3, 107.8, 101.4, 58.9, 55.2, 31.2, 18.6.

**HRMS (ESI)** calcd for [M+H]<sup>+</sup> C<sub>18</sub>H<sub>21</sub>N<sub>2</sub>O, *m/z*: 281.1648, found: 281.1637, Error 3.9 ppm.

**IR (KBr)**: 2970, 1925, 1518, 1249, 1171, 745 cm<sup>-1</sup>.

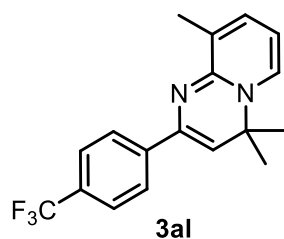

**4,4,9-trimethyl-2-(4-(trifluoromethyl)phenyl)-4H-pyrido[1,2-a]pyrimidine (3al)**

Obtained as yellow liquid (51.7 mg, 81% yield); <sup>1</sup>H NMR (600 MHz, CDCl<sub>3</sub>) δ 7.97 (d, *J* = 8.2 Hz, 2H), 7.59 (d, *J* = 8.2 Hz, 2H), 7.20 (d, *J* = 7.1 Hz, 1H), 6.90 (d, *J* = 6.5 Hz, 1H), 6.10 (t, *J* = 6.8 Hz, 1H), 5.16 (s, 1H), 2.24 (s, 3H), 1.64 (s, 6H); <sup>13</sup>C NMR (150 MHz, CDCl<sub>3</sub>) δ 151.2, 142.6, 140.6, 132.3, 131.6, 129.3 (q, *J* = 31.8 Hz), 129.1, 125.8, 124.9 (q, *J* = 3.5 Hz), 124.4 (q, *J* = 270.3 Hz), 108.5, 104.4, 59.2, 31.2, 18.6; <sup>19</sup>F NMR (565 MHz, CDCl<sub>3</sub>) δ -62.3.

**HRMS (ESI)** calcd for [M+H]<sup>+</sup> C<sub>18</sub>H<sub>18</sub>F<sub>3</sub>N<sub>2</sub>, *m/z*: 319.1417, found: 319.1409, Error 2.5 ppm.

**IR (KBr)**: 2975, 1522, 1325, 1163, 1122, 855 cm<sup>-1</sup>.

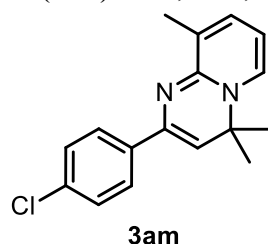

**2-(4-chlorophenyl)-4,4,9-trimethyl-4H-pyrido[1,2-a]pyrimidine (3am)**

Obtained as yellow liquid (54.1 mg, 95% yield); <sup>1</sup>H NMR (600 MHz, CDCl<sub>3</sub>) δ 7.80 (d, *J* = 8.5 Hz, 2H), 7.29 (d, *J* = 8.5 Hz, 2H), 7.16 (d, *J* = 7.0 Hz, 1H), 6.87 (d, *J* = 6.4 Hz, 1H), 6.05 (t, *J* = 6.8 Hz, 1H), 5.06 (s, 1H), 2.22 (s, 3H), 1.60 (s, 6H); <sup>13</sup>C NMR (150 MHz, CDCl<sub>3</sub>) δ 151.0, 140.6, 137.7, 133.0, 131.9, 131.5, 129.0, 128.0, 126.8, 108.1, 102.9, 59.0, 31.1, 18.6.

**HRMS (ESI)** calcd for [M+H]<sup>+</sup> C<sub>17</sub>H<sub>18</sub>ClN<sub>2</sub>, *m/z*: 285.1153, found: 285.1165, Error -4.4 ppm.

**IR (KBr)**: 2973, 1638, 1519, 1491, 1086, 848, 744 cm<sup>-1</sup>.

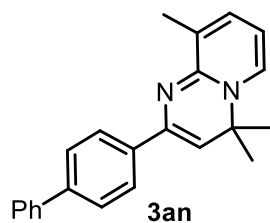

**2-([1,1'-biphenyl]-4-yl)-4,4,9-trimethyl-4H-pyrido[1,2-a]pyrimidine (3an)**

Obtained as yellow solid (64.0 mg, 98% yield, m.p. = 116-118 °C); <sup>1</sup>H NMR (600 MHz, CDCl<sub>3</sub>) δ 7.94 (d, *J* = 7.6 Hz, 2H), 7.62 (d, *J* = 7.7 Hz, 2H), 7.59 (d, *J* = 7.6 Hz, 2H), 7.41 (t, *J* = 7.4 Hz, 2H), 7.31 (t, *J* = 7.3 Hz, 1H), 7.15 (d, *J* = 7.1 Hz, 1H), 6.85 (d, *J* = 6.3 Hz, 1H), 6.03 (t, *J* = 6.7 Hz, 1H), 5.13 (s, 1H), 2.25 (s, 3H), 1.61 (s, 6H); <sup>13</sup>C NMR (150 MHz, CDCl<sub>3</sub>) δ 151.0, 141.2, 141.1, 140.0, 138.2, 131.7, 131.7, 129.1, 128.6, 127.0, 126.9, 126.6, 125.9, 107.9, 103.0, 59.0, 31.2, 18.7.

**HRMS (ESI)** calcd for [M+H]<sup>+</sup> C<sub>23</sub>H<sub>23</sub>N<sub>2</sub>, *m/z*: 327.1856, found: 327.1864, Error -2.6 ppm.

**IR (KBr)**: 2972, 1636, 1522, 763, 745, 698 cm<sup>-1</sup>.

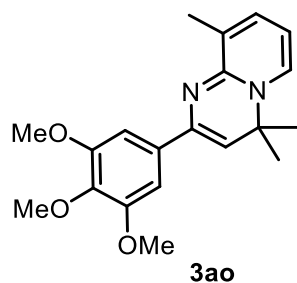

**4,4,9-trimethyl-2-(3,4,5-trimethoxyphenyl)-4H-pyrido[1,2-a]pyrimidine (3ao)**

Obtained as yellow solid (61.3 mg, 90% yield, m.p. = 110-112 °C); <sup>1</sup>H NMR (400 MHz, CDCl<sub>3</sub>) δ 7.20 (d, *J* = 7.0 Hz, 1H), 7.16 (s, 2H), 6.89 (d, *J* = 6.4 Hz, 1H), 6.07 (t, *J* = 6.8 Hz, 1H), 5.04 (s, 1H), 3.91 (s, 6H), 3.85 (s, 3H), 2.24 (s, 3H), 1.63 (s, 6H); <sup>13</sup>C NMR (100 MHz, CDCl<sub>3</sub>) δ 152.8, 150.9, 141.3, 137.8, 134.9, 131.8, 131.4, 129.0, 108.0, 102.8, 102.4, 60.7, 59.0, 55.9, 31.0, 18.5.

**HRMS (ESI)** calcd for [M+H]<sup>+</sup> C<sub>20</sub>H<sub>25</sub>N<sub>2</sub>O<sub>3</sub>, *m/z*: 341.1860, found: 341.1859, Error 0.1 ppm.

**IR (KBr)**: 2938, 1581, 1519, 1339, 1126, 734 cm<sup>-1</sup>.

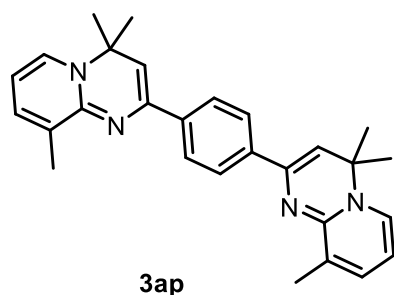

**1,4-bis(4,4,9-trimethyl-4H-pyrido[1,2-a]pyrimidin-2-yl)benzene (3ap)**

Obtained as yellow solid (70.7 mg, 84% yield, m.p. = 201-203 °C); <sup>1</sup>H NMR (400 MHz, CDCl<sub>3</sub>) δ 7.86 (s, 4H), 7.16 (d, *J* = 7.0 Hz, 2H), 6.85 (d, *J* = 6.4 Hz, 2H), 6.02 (s, 2H), 5.13 (s, 2H), 2.25 (s, 6H), 1.61 (s, 12H); <sup>13</sup>C NMR (100 MHz, CDCl<sub>3</sub>) δ 150.9, 141.3, 138.1, 131.7, 131.5, 129.0, 125.0, 107.7, 102.6, 58.9, 31.1, 18.6.

**HRMS (ESI)** calcd for [M+Na]<sup>+</sup> C<sub>28</sub>H<sub>30</sub>N<sub>4</sub>Na, *m/z*: 445.2363, found: 445.2367, Error -0.9 ppm.

**IR (KBr)**: 2966, 1631, 1517, 1175, 1086, 738 cm<sup>-1</sup>.

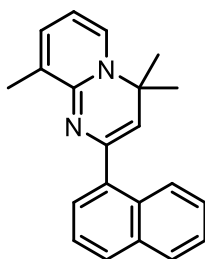

**3aq**

**4,4,9-trimethyl-2-(naphthalen-1-yl)-4H-pyrido[1,2-a]pyrimidine (3aq)**

Obtained as yellow liquid (38.2 mg, 64% yield);  $^1\text{H NMR}$  (600 MHz,  $\text{CDCl}_3$ )  $\delta$  8.49 (d,  $J = 3.4$  Hz, 1H), 7.84 – 7.78 (m, 1H), 7.76 (d,  $J = 8.1$  Hz, 1H), 7.60 (d,  $J = 6.6$  Hz, 1H), 7.43 (t,  $J = 7.2$  Hz, 3H), 7.21 (d,  $J = 7.1$  Hz, 1H), 6.87 (d,  $J = 6.4$  Hz, 1H), 6.08 (t,  $J = 6.8$  Hz, 1H), 4.84 (s, 1H), 2.15 (s, 3H), 1.68 (s, 6H);  $^{13}\text{C NMR}$  (150 MHz,  $\text{CDCl}_3$ )  $\delta$  150.5, 144.0, 139.0, 133.9, 131.8, 131.7, 131.6, 129.2, 128.0, 127.8, 126.8, 126.1, 125.2, 125.1, 108.0, 108.0, 59.2, 31.2, 18.8.

**HRMS (ESI)** calcd for  $[\text{M}+\text{H}]^+$   $\text{C}_{21}\text{H}_{21}\text{N}_2$ ,  $m/z$ : 301.1699, found: 301.1696, Error 1.1 ppm.

**IR (KBr)**: 2972, 1696, 1511, 1458, 779, 744  $\text{cm}^{-1}$ .

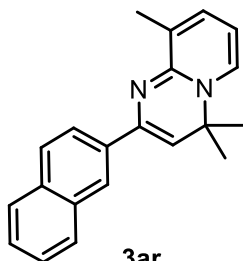

**3ar**

**4,4,9-trimethyl-2-(naphthalen-2-yl)-4H-pyrido[1,2-a]pyrimidine (3ar)**

Obtained as yellow solid (54.0 mg, 90% yield, m.p. = 150-152 °C);  $^1\text{H NMR}$  (600 MHz,  $\text{CDCl}_3$ )  $\delta$  8.36 (s, 1H), 7.84 (dd,  $J = 8.6, 1.7$  Hz, 1H), 7.80 (d,  $J = 7.8$  Hz, 1H), 7.71 (dd,  $J = 8.1, 4.5$  Hz, 2H), 7.39 – 7.30 (m, 2H), 7.10 (d,  $J = 7.0$  Hz, 1H), 6.80 (d,  $J = 6.4$  Hz, 1H), 5.97 (t,  $J = 6.8$  Hz, 1H), 5.17 (s, 1H), 2.23 (s, 3H), 1.56 (s, 6H);  $^{13}\text{C NMR}$  (150 MHz,  $\text{CDCl}_3$ )  $\delta$  151.1, 141.4, 136.4, 133.5, 133.1, 131.8, 131.7, 129.1, 128.5, 127.4, 127.3, 125.6, 125.4, 124.6, 123.8, 108.0, 103.7, 59.1, 31.2, 18.7.

**HRMS (ESI)** calcd for  $[\text{M}+\text{H}]^+$   $\text{C}_{21}\text{H}_{21}\text{N}_2$ ,  $m/z$ : 301.1699, found: 301.1694, Error 1.6 ppm.

**IR (KBr)**: 2973, 1693, 1624, 1519, 1487, 748  $\text{cm}^{-1}$ .

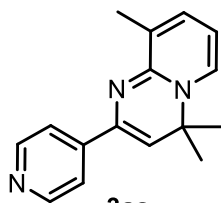

**3as**

**4,4,9-trimethyl-2-(pyridin-4-yl)-4H-pyrido[1,2-a]pyrimidine (3as)**

Obtained as yellow liquid (25.5 mg, 51% yield) at 150 °C;  $^1\text{H NMR}$  (600 MHz,  $\text{CDCl}_3$ )  $\delta$  8.57 (d,  $J = 4.6$  Hz, 2H), 7.80 – 7.70 (m, 2H), 7.20 (d,  $J = 7.1$  Hz, 1H), 6.91 (d,  $J = 6.4$  Hz, 1H), 6.11 (t,  $J = 6.8$  Hz, 1H), 5.25 (s, 1H), 2.24 (s, 3H), 1.64 (s, 6H);  $^{13}\text{C NMR}$  (150 MHz,  $\text{CDCl}_3$ )  $\delta$  151.3, 149.6, 146.5, 139.7, 132.2, 131.7, 129.1, 119.9, 108.5, 105.2, 59.2, 31.1, 18.5.

**HRMS (ESI)** calcd for  $[\text{M}+\text{H}]^+$   $\text{C}_{16}\text{H}_{18}\text{N}_3$ ,  $m/z$ : 252.1495, found: 252.1486, Error 3.6 ppm.

**IR (KBr)**: 2972, 1637, 1595, 1517, 1086, 744  $\text{cm}^{-1}$ .

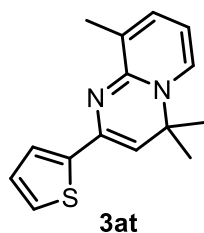

**4,4,9-trimethyl-2-(thiophen-2-yl)-4H-pyrido[1,2-a]pyrimidine (3at)**

Obtained as yellow liquid (29.8 mg, 58% yield);  $^1\text{H NMR}$  (600 MHz,  $\text{CDCl}_3$ )  $\delta$  7.34 (dd,  $J = 3.6, 1.1$  Hz, 1H), 7.23 – 7.15 (m, 2H), 7.00 (dd,  $J = 5.0, 3.6$  Hz, 1H), 6.91 – 6.85 (m, 1H), 6.08 (t,  $J = 6.8$  Hz, 1H), 5.05 (s, 1H), 2.22 (s, 3H), 1.62 (s, 6H).  $^{13}\text{C NMR}$  (150 MHz,  $\text{CDCl}_3$ )  $\delta$  151.1, 145.5, 137.7, 132.0, 131.5, 129.0, 127.2, 124.6, 122.1, 108.2, 100.7, 59.0, 31.2, 18.5.

**HRMS (ESI)** calcd for  $[\text{M}+\text{H}]^+$   $\text{C}_{15}\text{H}_{17}\text{N}_2\text{S}$ ,  $m/z$ : 257.1107, found: 257.1101, Error 2.3 ppm.

**IR (KBr)**: 2973, 1638, 1373, 1241, 745  $\text{cm}^{-1}$ .

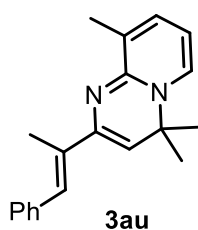

**4,4,9-trimethyl-2-(1-phenylprop-1-en-2-yl)-4H-pyrido[1,2-a]pyrimidine (3au)**

Obtained as yellow liquid (28.9 mg, 50% yield);  $^1\text{H NMR}$  (400 MHz,  $\text{CDCl}_3$ )  $\delta$  7.75 (s, 1H), 7.37 – 7.30 (m, 4H), 7.22 – 7.17 (m, 1H), 7.14 (d,  $J = 6.6$  Hz, 1H), 6.88 – 6.78 (m, 1H), 6.00 (t,  $J = 6.8$  Hz, 1H), 4.87 (s, 1H), 2.21 (s, 3H), 2.04 (d,  $J = 1.2$  Hz, 3H), 1.59 (s, 6H);  $^{13}\text{C NMR}$  (100 MHz,  $\text{CDCl}_3$ )  $\delta$  150.3, 142.3, 139.1, 134.0, 131.6, 131.5, 129.4, 128.9, 127.8, 127.4, 125.9, 107.5, 105.3, 58.8, 31.2, 18.6, 14.2.

**HRMS (ESI)** calcd for  $[\text{M}+\text{H}]^+$   $\text{C}_{20}\text{H}_{23}\text{N}_2$ ,  $m/z$ : 291.1856, found: 291.1851, Error 1.7 ppm.

**IR (KBr)**: 2972, 1638, 1528, 1092, 743  $\text{cm}^{-1}$ .

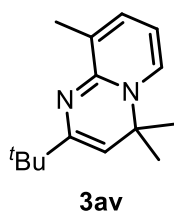

**2-(tert-butyl)-4,4,9-trimethyl-4H-pyrido[1,2-a]pyrimidine (3av)**

Obtained as yellow liquid (17.3 mg, 38% yield) at 150 °C with 10mol% **Cat B**;  $^1\text{H NMR}$  (600 MHz,  $\text{CDCl}_3$ )  $\delta$  7.08 (d,  $J = 7.1$  Hz, 1H), 6.73 (d,  $J = 6.4$  Hz, 1H), 5.90 (t,  $J = 6.8$  Hz, 1H), 4.38 (s, 1H), 2.08 (s, 3H), 1.49 (s, 6H), 1.13 (s, 9H);  $^{13}\text{C NMR}$  (150 MHz,  $\text{CDCl}_3$ )  $\delta$  152.3, 150.1, 131.7, 130.6, 129.1, 106.6, 100.2, 58.4, 35.2, 31.4, 28.6, 18.5.

**HRMS (ESI)** calcd for  $[\text{M}+\text{H}]^+$   $\text{C}_{15}\text{H}_{23}\text{N}_2$ ,  $m/z$ : 231.1856, found: 231.1864, Error -3.7 ppm.

**IR (KBr)**: 2954, 2867, 1639, 1701, 1526, 1103, 740  $\text{cm}^{-1}$ .

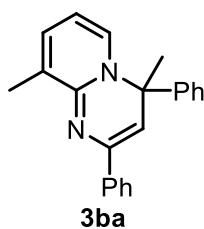

#### 4,9-dimethyl-2,4-diphenyl-4H-pyrido[1,2-a]pyrimidine (3ba)

Obtained as yellow liquid (48.7 mg, 78% yield);  $^1\text{H NMR}$  (600 MHz,  $\text{CDCl}_3$ )  $\delta$  7.90 – 7.83 (m, 2H), 7.60 – 7.53 (m, 2H), 7.35 (t,  $J = 7.8$  Hz, 2H), 7.31 (t,  $J = 7.6$  Hz, 2H), 7.28 – 7.22 (m, 2H), 6.81 (d,  $J = 6.4$  Hz, 1H), 6.71 (d,  $J = 7.0$  Hz, 1H), 5.85 (t,  $J = 6.8$  Hz, 1H), 5.13 (s, 1H), 2.27 (s, 3H), 2.01 (s, 3H);  $^{13}\text{C NMR}$  (150 MHz,  $\text{CDCl}_3$ )  $\delta$  150.5, 147.1, 139.8, 139.0, 132.0, 131.8, 131.7, 128.5, 127.9, 127.6, 127.5, 126.9, 125.5, 107.6, 103.7, 65.0, 28.9, 18.6.

**HRMS (ESI)** calcd for  $[\text{M}+\text{H}]^+$   $\text{C}_{22}\text{H}_{21}\text{N}_2$ ,  $m/z$ : 313.1699, found: 313.1692, Error 2.3 ppm.

**IR (KBr)**: 2920, 2850, 1643, 1480, 1448, 697  $\text{cm}^{-1}$ .

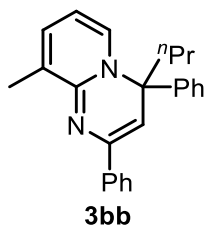

#### 9-methyl-2,4-diphenyl-4-propyl-4H-pyrido[1,2-a]pyrimidine (3bb)

Obtained as yellow solid (51.6 mg, 76% yield, m.p. = 132-134 °C);  $^1\text{H NMR}$  (600 MHz,  $\text{CDCl}_3$ )  $\delta$  7.87 (d,  $J = 7.5$  Hz, 2H), 7.59 (d,  $J = 7.7$  Hz, 2H), 7.36 (t,  $J = 7.7$  Hz, 2H), 7.32 (t,  $J = 7.6$  Hz, 2H), 7.25 (dd,  $J = 9.9, 4.6$  Hz, 2H), 6.80 (d,  $J = 6.2$  Hz, 1H), 6.68 (d,  $J = 7.0$  Hz, 1H), 5.84 (t,  $J = 6.7$  Hz, 1H), 4.98 (s, 1H), 2.45 (td,  $J = 13.2, 4.5$  Hz, 1H), 2.26 (s, 3H), 1.97 (td,  $J = 13.4, 3.9$  Hz, 1H), 1.92 – 1.81 (m, 1H), 1.45 – 1.36 (m, 1H), 0.99 (t,  $J = 7.3$  Hz, 3H);  $^{13}\text{C NMR}$  (150 MHz,  $\text{CDCl}_3$ )  $\delta$  151.4, 147.8, 140.4, 139.1, 132.0, 131.9, 131.7, 128.5, 128.0, 127.5, 127.4, 127.1, 125.5, 107.5, 102.3, 68.4, 43.9, 18.7, 17.2, 14.3.

**HRMS (ESI)** calcd for  $[\text{M}+\text{H}]^+$   $\text{C}_{24}\text{H}_{25}\text{N}_2$ ,  $m/z$ : 341.2012, found: 341.2007, Error 1.6 ppm.

**IR (KBr)**: 2957, 1639, 1520, 1307, 740, 695  $\text{cm}^{-1}$ .

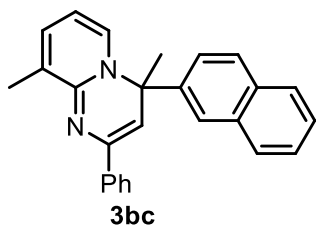

#### 4,9-dimethyl-4-(naphthalen-2-yl)-2-phenyl-4H-pyrido[1,2-a]pyrimidine (3bc)

Obtained as yellow solid (63.7 mg, 88% yield, m.p. = 121-123 °C);  $^1\text{H NMR}$  (600 MHz,  $\text{CDCl}_3$ )  $\delta$  7.92 (s, 1H), 7.88 (d,  $J = 7.4$  Hz, 2H), 7.86 – 7.83 (m, 1H), 7.83 – 7.75 (m, 3H), 7.53 – 7.46 (m, 2H), 7.32 (t,  $J = 7.6$  Hz, 2H), 7.25 (t,  $J = 7.3$  Hz, 1H), 6.81 (d,  $J = 6.4$  Hz, 1H), 6.71 (d,  $J = 7.0$  Hz, 1H), 5.82 (t,  $J = 6.8$  Hz, 1H), 5.16 (s, 1H), 2.30 (s, 3H), 2.12 (s, 3H);  $^{13}\text{C NMR}$  (150 MHz,  $\text{CDCl}_3$ )  $\delta$  150.6, 144.0, 140.0, 139.0, 132.7, 132.5, 132.1, 131.8, 128.7, 128.3, 128.0, 127.6, 127.5, 126.5, 126.2, 125.5, 124.2, 107.7, 103.4, 65.2, 28.9, 18.7.

**HRMS (ESI)** calcd for  $[\text{M}+\text{H}]^+$   $\text{C}_{26}\text{H}_{23}\text{N}_2$ ,  $m/z$ : 363.1856, found: 363.1856, Error 0 ppm.

**IR (KBr)**: 3056, 2974, 1638, 1518, 1178, 745  $\text{cm}^{-1}$ .

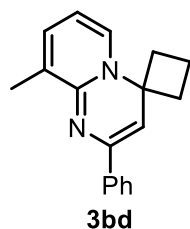

**9'-methyl-2'-phenylspiro[cyclobutane-1,4'-pyrido[1,2-a]pyrimidine] (3bd)**

Obtained as yellow liquid (33.6 mg, 64% yield);  $^1\text{H NMR}$  (600 MHz,  $\text{CDCl}_3$ )  $\delta$  7.89 (d,  $J = 7.7$  Hz, 2H), 7.41 (d,  $J = 7.1$  Hz, 1H), 7.35 (t,  $J = 7.6$  Hz, 2H), 7.27 (t,  $J = 7.3$  Hz, 1H), 6.82 (d,  $J = 6.4$  Hz, 1H), 6.05 (t,  $J = 6.8$  Hz, 1H), 5.60 (s, 1H), 2.96 (dd,  $J = 22.3, 10.7$  Hz, 2H), 2.33 – 2.25 (m, 2H), 2.18 (s, 3H), 1.97 – 1.90 (m, 1H), 1.89 – 1.80 (m, 1H);  $^{13}\text{C NMR}$  (150 MHz,  $\text{CDCl}_3$ )  $\delta$  151.1, 140.4, 139.2, 131.8, 131.5, 129.7, 128.0, 127.4, 125.4, 107.8, 102.6, 63.2, 41.7, 18.6, 12.1.

**HRMS (ESI)** calcd for  $[\text{M}+\text{H}]^+$   $\text{C}_{18}\text{H}_{19}\text{N}_2$ ,  $m/z$ : 263.1543, found: 263.1540, Error 1.1 ppm.

**IR (KBr)**: 2947, 1676, 1623, 1598, 1485, 1259, 738, 693  $\text{cm}^{-1}$ .

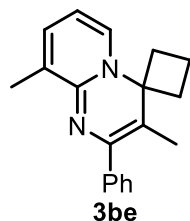

**3',9'-dimethyl-2'-phenylspiro[cyclobutane-1,4'-pyrido[1,2-a]pyrimidine] (3be)**

Obtained as yellow liquid (36.6 mg, 66% yield);  $^1\text{H NMR}$  (400 MHz,  $\text{CDCl}_3$ )  $\delta$  7.52 – 7.45 (m, 2H), 7.34 (dd,  $J = 14.3, 7.0$  Hz, 3H), 7.23 (dd,  $J = 10.3, 4.3$  Hz, 1H), 6.75 (d,  $J = 6.4$  Hz, 1H), 6.04 (t,  $J = 6.8$  Hz, 1H), 2.82 – 2.70 (m, 4H), 2.07 (s, 3H), 1.98 (s, 3H), 1.95 – 1.82 (m, 2H);  $^{13}\text{C NMR}$  (100 MHz,  $\text{CDCl}_3$ )  $\delta$  148.7, 141.6, 139.5, 131.0, 130.4, 129.5, 129.2, 127.5, 126.6, 107.4, 107.0, 66.7, 36.4, 18.4, 15.0, 13.1.

**HRMS (ESI)** calcd for  $[\text{M}+\text{H}]^+$   $\text{C}_{19}\text{H}_{21}\text{N}_2$ ,  $m/z$ : 277.1699, found: 277.1702, Error -1.0 ppm.

**IR (KBr)**: 2949, 1641, 1535, 1263, 737, 701  $\text{cm}^{-1}$ .

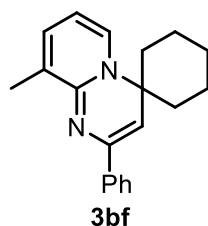

**9'-methyl-2'-phenylspiro[cyclohexane-1,4'-pyrido[1,2-a]pyrimidine] (3bf)**

Obtained as yellow liquid (27.8 mg, 48% yield);  $^1\text{H NMR}$  (400 MHz,  $\text{CDCl}_3$ )  $\delta$  7.94 – 7.85 (m, 2H), 7.39 – 7.31 (m, 2H), 7.29 – 7.25 (m, 2H), 6.90 (dd,  $J = 5.3, 1.2$  Hz, 1H), 6.11 (t,  $J = 6.8$  Hz, 1H), 5.50 (s, 1H), 2.27 (s, 3H), 2.22 (d,  $J = 7.2$  Hz, 2H), 1.77 – 1.70 (m, 5H), 1.71 – 1.64 (m, 2H), 1.29 – 1.14 (m, 1H);  $^{13}\text{C NMR}$  (100 MHz,  $\text{CDCl}_3$ )  $\delta$  151.7, 142.5, 139.6, 131.5, 128.2, 128.0, 127.5, 125.9, 108.0, 97.5, 61.4, 36.9, 25.4, 21.6, 18.7.

**HRMS (ESI)** calcd for  $[\text{M}+\text{H}]^+$   $\text{C}_{20}\text{H}_{23}\text{N}_2$ ,  $m/z$ : 291.1856, found: 291.1847, Error 3.1 ppm.

**IR (KBr)**: 2930, 1634, 1514, 1173, 739,  $\text{cm}^{-1}$ .



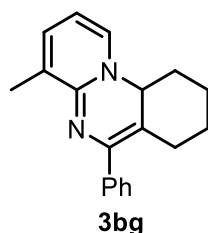

**4-methyl-6-phenyl-8,9,10,10a-tetrahydro-7H-pyrido[1,2-a]quinazoline (3bg)**

Obtained as yellow liquid (38.0 mg, 69% yield);  $^1\text{H NMR}$  (600 MHz,  $\text{CDCl}_3$ )  $\delta$  7.47 (d,  $J = 7.5$  Hz, 2H), 7.33 (t,  $J = 7.6$  Hz, 2H), 7.27 – 7.23 (m, 1H), 6.76 (d,  $J = 6.4$  Hz, 1H), 6.70 (d,  $J = 6.8$  Hz, 1H), 5.96 (t,  $J = 6.7$  Hz, 1H), 4.77 (dd,  $J = 10.4, 4.5$  Hz, 1H), 2.80 – 2.70 (m, 1H), 2.07 (s, 3H), 2.06 – 2.01 (m, 2H), 2.00 – 1.95 (m, 1H), 1.70 (td,  $J = 13.6, 4.1$  Hz, 2H), 1.63 – 1.52 (m, 1H), 1.43 – 1.34 (m, 1H);  $^{13}\text{C NMR}$  (150 MHz,  $\text{CDCl}_3$ )  $\delta$  149.0, 140.6, 136.8, 131.9, 131.5, 131.4, 128.9, 127.6, 126.8, 111.3, 107.1, 64.0, 35.8, 30.1, 27.1, 26.0, 18.3.

**HRMS (ESI)** calcd for  $[\text{M}+\text{H}]^+$   $\text{C}_{19}\text{H}_{21}\text{N}_2$ ,  $m/z$ : 277.1699, found: 277.1692, Error 2.5 ppm.

**IR (KBr)**: 2939, 1667, 1554, 1448, 734, 702  $\text{cm}^{-1}$ .

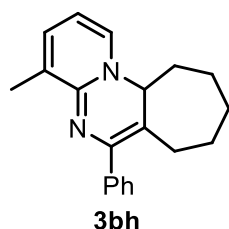

**4-methyl-6-phenyl-7,8,9,10,11,11a-hexahydrocyclohepta[e]pyrido[1,2-a]pyrimidine (3bh)**

Obtained as yellow liquid (55.2 mg, 95% yield);  $^1\text{H NMR}$  (600 MHz,  $\text{CDCl}_3$ )  $\delta$  7.49 (d,  $J = 7.8$  Hz, 2H), 7.33 (t,  $J = 7.6$  Hz, 2H), 7.25 (t,  $J = 7.3$  Hz, 1H), 6.82 (d,  $J = 6.4$  Hz, 1H), 6.79 (d,  $J = 6.7$  Hz, 1H), 6.03 (t,  $J = 6.7$  Hz, 1H), 4.37 (dd,  $J = 11.3, 4.1$  Hz, 1H), 2.76 – 2.65 (m, 1H), 2.17 (s, 3H), 2.06 – 1.99 (m, 1H), 1.99 – 1.92 (m, 1H), 1.90 – 1.83 (m, 1H), 1.82 – 1.75 (m, 1H), 1.73 – 1.63 (m, 3H), 1.60 – 1.54 (m, 1H), 1.45 – 1.35 (m, 1H);  $^{13}\text{C NMR}$  (150 MHz,  $\text{CDCl}_3$ )  $\delta$  148.6, 140.8, 140.6, 132.4, 131.0, 130.8, 129.0, 127.5, 126.8, 108.9, 107.6, 64.8, 35.2, 29.9, 28.9, 26.3, 25.8, 18.0.

**HRMS (ESI)** calcd for  $[\text{M}+\text{H}]^+$   $\text{C}_{20}\text{H}_{23}\text{N}_2$ ,  $m/z$ : 291.1856, found: 291.1865, Error -3.2 ppm.

**IR (KBr)**: 2925, 1635, 1525, 1445, 740, 701  $\text{cm}^{-1}$ .

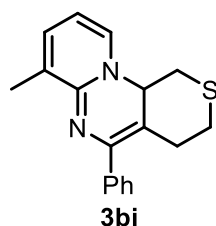

**7-methyl-5-phenyl-1,3,4,11a-tetrahydropyrido[1,2-a]thiopyrano[4,3-e]pyrimidine (3bi)**

Obtained as yellow liquid (24.7 mg, 42% yield);  $^1\text{H NMR}$  (600 MHz,  $\text{CDCl}_3$ )  $\delta$  7.42 (d,  $J = 7.8$  Hz, 2H), 7.34 (t,  $J = 7.4$  Hz, 2H), 7.30 – 7.25 (m, 1H), 6.82 (d,  $J = 6.3$  Hz, 1H), 6.74 (d,  $J = 6.8$  Hz, 1H), 6.07 (t,  $J = 6.7$  Hz, 1H), 5.20 (dd,  $J = 10.9, 2.5$  Hz, 1H), 3.34 (t,  $J = 11.7$  Hz, 1H), 3.05 (d,  $J = 13.8$  Hz, 1H), 2.81 (td,  $J = 12.7, 2.4$  Hz, 1H), 2.61 (d,  $J = 12.0$  Hz, 1H), 2.44 (d,  $J = 12.8$  Hz, 1H), 2.24 (td,  $J = 13.2, 3.5$  Hz, 1H), 2.08 (s, 3H);  $^{13}\text{C NMR}$  (150 MHz,  $\text{CDCl}_3$ )  $\delta$  148.8, 140.1, 139.3, 131.9, 131.8, 131.6, 128.7, 127.8, 127.2, 108.5, 108.1, 65.2, 34.2, 33.5, 29.0, 18.2.

**HRMS (ESI)** calcd for  $[\text{M}+\text{H}]^+$   $\text{C}_{18}\text{H}_{19}\text{N}_2\text{S}$ ,  $m/z$ : 295.1263, found: 295.1255, Error 2.7 ppm.

IR (KBr): 2927, 1643, 1553, 1377, 1061, 735, 701  $\text{cm}^{-1}$ .

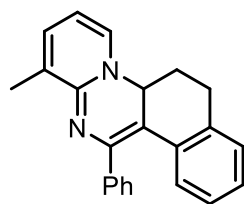

**3bj**

**1-methyl-12-phenyl-5a,6-dihydro-7H-benzo[f]pyrido[1,2-a]quinazoline (3bj)**

Obtained as yellow solid (54.5 mg, 84% yield)  $^1\text{H NMR}$  (600 MHz,  $\text{CDCl}_3$ )  $\delta$  7.54 – 7.45 (m, 2H), 7.25 – 7.19 (m, 3H), 7.04 (d,  $J = 7.6$  Hz, 1H), 6.98 – 6.91 (m, 3H), 6.77 – 6.68 (m, 2H), 6.15 (t,  $J = 6.7$  Hz, 1H), 4.73 (dd,  $J = 11.8, 4.1$  Hz, 1H), 3.05 – 2.96 (m, 2H), 2.54 – 2.46 (m, 1H), 2.41 – 2.32 (m, 1H), 2.23 (s, 3H);  $^{13}\text{C NMR}$  (100 MHz,  $\text{CDCl}_3$ )  $\delta$  150.4, 141.8, 141.0, 136.1, 134.7, 132.4, 131.4, 130.6, 130.0, 129.2, 128.0, 127.8, 127.4, 125.2, 124.9, 108.9, 104.1, 59.9, 30.6, 28.8, 18.3.

HRMS (ESI) calcd for  $[\text{M}+\text{H}]^+$   $\text{C}_{23}\text{H}_{21}\text{N}_2$ ,  $m/z$ : 325.1699, found: 325.1689, Error 4.7 ppm.

IR (KBr): 2926, 1640, 1518, 1449, 736, 701  $\text{cm}^{-1}$ .

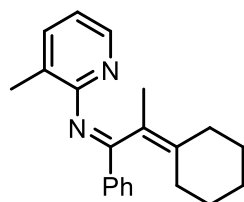

**3bk**

**2-cyclohexylidene-N-(3-methylpyridin-2-yl)-1-phenylpropan-1-imine (3bk)**

Obtained as yellow liquid (45.8 mg, 75% yield);  $^1\text{H NMR}$  (400 MHz,  $\text{CDCl}_3$ )  $\delta$  8.22 – 8.13 (m, 1H), 8.07 – 7.93 (m, 2H), 7.44 (dd,  $J = 16.3, 8.8$  Hz, 4H), 6.89 (dd,  $J = 7.4, 4.9$  Hz, 1H), 2.21 (s, 3H), 2.06 (d,  $J = 5.8$  Hz, 2H), 1.89 (t,  $J = 5.8$  Hz, 2H), 1.77 (s, 3H), 1.60 – 1.10 (m, 6H);  $^{13}\text{C NMR}$  (100 MHz,  $\text{CDCl}_3$ )  $\delta$  172.1, 162.0, 145.4, 137.7, 137.6, 136.9, 130.7, 128.6, 128.3, 124.5, 123.0, 119.1, 32.7, 29.2, 27.5, 27.2, 3.43, 17.7, 17.3.

HRMS (ESI) calcd for  $[\text{M}+\text{H}]^+$   $\text{C}_{21}\text{H}_{25}\text{N}_2$ ,  $m/z$ : 305.2012, found: 305.2026, Error -4.5 ppm.

IR (KBr): 2926, 2853, 1617, 1578, 1446, 1413, 700  $\text{cm}^{-1}$ .

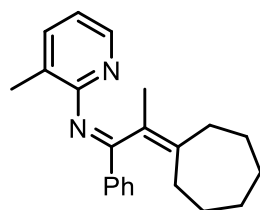

**3bl**

**2-cycloheptylidene-N-(3-methylpyridin-2-yl)-1-phenylpropan-1-imine (3bl)**

Obtained as yellow liquid (51.5 mg, 81% yield);  $^1\text{H NMR}$  (400 MHz,  $\text{CDCl}_3$ )  $\delta$  8.17 (dd,  $J = 4.8, 1.2$  Hz, 1H), 7.99 (dd,  $J = 7.8, 1.6$  Hz, 2H), 7.51 – 7.36 (m, 4H), 6.88 (dd,  $J = 7.4, 4.9$  Hz, 1H), 2.23 (s, 3H), 2.15 (s, 2H), 2.04 (s, 2H), 1.79 (s, 3H), 1.53 – 1.13 (m, 8H);  $^{13}\text{C NMR}$  (100 MHz,  $\text{CDCl}_3$ )  $\delta$  172.0, 161.8, 145.4, 138.8, 137.7, 137.6, 130.7, 128.6, 128.3, 126.3, 124.7, 119.1, 33.4, 30.5, 30.5, 28.2, 27.1, 27.0, 18.4, 17.4.

HRMS (ESI) calcd for  $[\text{M}+\text{H}]^+$   $\text{C}_{22}\text{H}_{27}\text{N}_2$ ,  $m/z$ : 319.2169, found: 319.2178, Error -3.0 ppm.

IR (KBr): 2922, 1616, 1577, 1446, 1413, 785, 701  $\text{cm}^{-1}$ .

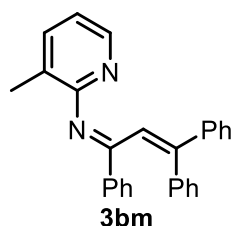

#### *N*-(3-methylpyridin-2-yl)-1,3,3-triphenylprop-2-en-1-imine (**3bm**)

Obtained as yellow solid (47.2 mg, 63% yield, m.p. = 162-164 °C) at 150 °C;  $^1\text{H NMR}$  (600 MHz,  $\text{CDCl}_3$ )  $\delta$  8.24 (d,  $J = 4.1$  Hz, 1H), 8.00 (d,  $J = 7.2$  Hz, 2H), 7.42 – 7.38 (m, 1H), 7.36 (t,  $J = 7.3$  Hz, 2H), 7.32 (t,  $J = 4.1$  Hz, 1H), 7.29 – 7.26 (m, 3H), 7.25 – 7.23 (m, 1H), 7.22 (d,  $J = 7.4$  Hz, 1H), 7.14 (t,  $J = 7.4$  Hz, 1H), 7.05 (t,  $J = 7.6$  Hz, 2H), 6.85 – 6.80 (m, 2H), 6.77 (d,  $J = 7.3$  Hz, 2H), 1.63 (s, 3H);  $^{13}\text{C NMR}$  (150 MHz,  $\text{CDCl}_3$ )  $\delta$  166.9, 161.2, 146.3, 145.2, 141.9, 139.3, 138.9, 137.7, 130.6, 129.5, 128.5, 128.4, 128.1, 128.1, 127.9, 127.8, 126.2, 124.5, 119.4, 16.6.

**HRMS (ESI)** calcd for  $[\text{M}+\text{H}]^+$   $\text{C}_{27}\text{H}_{23}\text{N}_2$ ,  $m/z$ : 375.1856, found: 375.1856, Error -0.1 ppm.

**IR (KBr)**: 2924, 1613, 1574, 1445, 1228, 737, 697  $\text{cm}^{-1}$ .

#### 3.2.1 General procedure for C-H vinylation/ $6\pi$ -electrocyclization of 2-pyridyl aldimines with vinyl triflates **4**

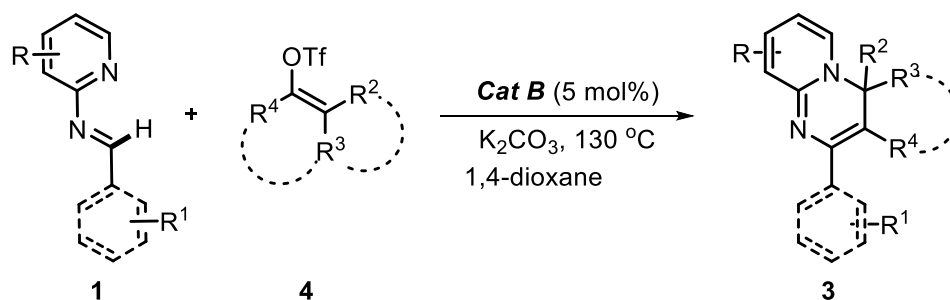

In glove box, to dry 1,4-dioxane (2 mL) were added substrate **1** (0.2 mmol, 1.0 equiv), substrate **4** (0.4 mmol, 2.0 equiv),  $\text{K}_2\text{CO}_3$  (0.3 mmol, 1.5 equiv) and **Cat B** (5 mol%) in a 10 mL oven-dried Schlenk tube. Then the tube was sealed and the mixture was stirred at 130 °C for 24 h. After the reaction was completed, the resulting mixture was concentrated in vacuo, and the residual was purified by silica gel column chromatography to give the product **3**.

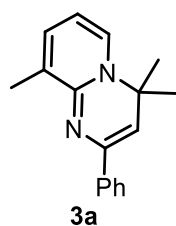

#### 4,4,9-trimethyl-2-phenyl-4H-pyrido[1,2-a]pyrimidine (**3a**)

Obtained as yellow liquid (49.3 mg, 98% yield);  $^1\text{H NMR}$  (400 MHz,  $\text{CDCl}_3$ )  $\delta$  7.87 (d,  $J = 8.1$  Hz, 2H), 7.34 (t,  $J = 7.7$  Hz, 2H), 7.26 (t,  $J = 7.3$  Hz, 1H), 7.16 (d,  $J = 7.1$  Hz, 1H), 6.90 – 6.81 (m, 1H), 6.03 (t,  $J = 6.8$  Hz, 1H), 5.09 (s, 1H), 2.24 (s, 3H), 1.60 (s, 6H);  $^{13}\text{C NMR}$  (100 MHz,  $\text{CDCl}_3$ )  $\delta$  151.0, 141.5, 139.1, 131.6, 131.6, 129.0, 127.9, 127.4, 125.5, 107.9, 102.9, 58.9, 31.1, 18.6.

**HRMS (ESI)** calcd for  $[\text{M}+\text{H}]^+$   $\text{C}_{17}\text{H}_{19}\text{N}_2$ ,  $m/z$ : 251.1543, found: 251.1554, Error -4.7 ppm.

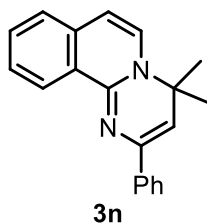

**4,4-dimethyl-2-phenyl-4H-pyrimido[2,1-a]isoquinoline (3n)**

Obtained as yellow solid (42.1 mg, 74% yield);  $^1\text{H NMR}$  (600 MHz,  $\text{CDCl}_3$ )  $\delta$  8.75 (d,  $J = 8.1$  Hz, 1H), 7.94 (d,  $J = 7.4$  Hz, 2H), 7.49 (t,  $J = 7.0$  Hz, 1H), 7.42 (d,  $J = 7.4$  Hz, 1H), 7.38 (t,  $J = 7.8$  Hz, 2H), 7.34 – 7.27 (m, 2H), 7.06 (d,  $J = 7.6$  Hz, 1H), 6.36 (d,  $J = 7.6$  Hz, 1H), 5.27 (s, 1H), 1.64 (s, 6H);  $^{13}\text{C NMR}$  (150 MHz,  $\text{CDCl}_3$ )  $\delta$  148.9, 140.6, 138.9, 134.1, 130.9, 128.0, 127.6, 127.5, 127.1, 127.0, 126.6, 125.5, 125.2, 107.8, 106.0, 58.4, 31.4.

**HRMS (ESI)** calcd for  $[\text{M}+\text{H}]^+$   $\text{C}_{20}\text{H}_{19}\text{N}_2$ ,  $m/z$ : 287.1543, found: 287.1549, Error -2.3 ppm.

**IR (KBr)**: 2971, 1636, 1561, 1537, 1344, 781, 677  $\text{cm}^{-1}$ .

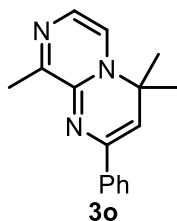

**4,4,9-trimethyl-2-phenyl-4H-pyrazino[1,2-a]pyrimidine (3o)**

Obtained as yellow liquid (38.4 mg, 76% yield);  $^1\text{H NMR}$  (600 MHz,  $\text{CDCl}_3$ )  $\delta$  7.86 – 7.76 (m, 2H), 7.36 (t,  $J = 7.6$  Hz, 2H), 7.32 – 7.27 (m, 1H), 7.06 (d,  $J = 4.8$  Hz, 1H), 6.88 (d,  $J = 4.8$  Hz, 1H), 5.17 (s, 1H), 2.52 (s, 3H), 1.60 (s, 6H);  $^{13}\text{C NMR}$  (150 MHz,  $\text{CDCl}_3$ )  $\delta$  159.6, 144.3, 141.3, 138.2, 128.1, 127.9, 125.4, 124.1, 120.7, 105.4, 58.6, 30.8, 21.8.

**IR (KBr)**: 2972, 1537, 1342, 1182, 745, 663  $\text{cm}^{-1}$ .

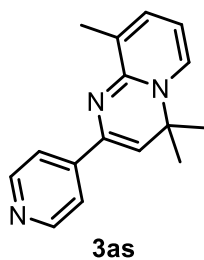

**4,4,9-trimethyl-2-(pyridin-4-yl)-4H-pyrido[1,2-a]pyrimidine (3as)**

Obtained as yellow liquid (47.9 mg, 95% yield) at 150 °C;  $^1\text{H NMR}$  (600 MHz,  $\text{CDCl}_3$ )  $\delta$  8.57 (d,  $J = 4.7$  Hz, 2H), 7.79 – 7.71 (m, 2H), 7.21 (d,  $J = 7.1$  Hz, 1H), 6.92 (d,  $J = 6.4$  Hz, 1H), 6.12 (t,  $J = 6.8$  Hz, 1H), 5.26 (s, 1H), 2.24 (s, 3H), 1.65 (s, 6H);  $^{13}\text{C NMR}$  (150 MHz,  $\text{CDCl}_3$ )  $\delta$  151.3, 149.7, 146.5, 139.6, 132.3, 131.7, 129.1, 119.9, 108.5, 105.2, 59.2, 31.1, 18.6.

**HRMS (ESI)** calcd for  $[\text{M}+\text{H}]^+$   $\text{C}_{16}\text{H}_{18}\text{N}_3$ ,  $m/z$ : 252.1495, found: 252.1497, Error -0.6 ppm.

**IR (KBr)**: 2972, 1637, 1595, 1517, 1086, 744  $\text{cm}^{-1}$ .

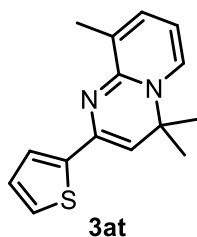

**4,4,9-trimethyl-2-(thiophen-2-yl)-4H-pyrido[1,2-a]pyrimidine (3at)**

Obtained as yellow liquid (35.2 mg, 69% yield);  $^1\text{H NMR}$  (600 MHz,  $\text{CDCl}_3$ )  $\delta$  7.36 – 7.32 (m, 1H), 7.21 – 7.14 (m, 2H), 7.02 – 6.97 (m, 1H), 6.87 (d,  $J = 6.2$  Hz, 1H), 6.06 (t,  $J = 6.6$  Hz, 1H), 5.04 (s, 1H), 2.21 (s, 3H), 1.61 (s, 6H);  $^{13}\text{C NMR}$  (150 MHz,  $\text{CDCl}_3$ )  $\delta$  151.1, 145.5, 137.6, 132.0, 131.5, 129.0, 127.2, 124.6, 122.1, 108.2, 100.7, 59.0, 31.2, 18.5.

**HRMS (ESI)** calcd for  $[\text{M}+\text{H}]^+$   $\text{C}_{15}\text{H}_{17}\text{N}_2\text{S}$ ,  $m/z$ : 257.1107, found: 257.1113, Error -2.3 ppm.

**IR (KBr)**: 2974, 1638, 1535, 1372, 744  $\text{cm}^{-1}$ .

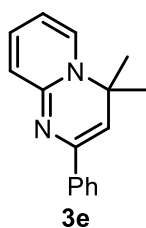

**4,4-dimethyl-2-phenyl-4H-pyrido[1,2-a]pyrimidine (3e)**

Obtained as yellow liquid (20.4 mg, 43% yield) at 150 °C;  $^1\text{H NMR}$  (600 MHz,  $\text{CDCl}_3$ )  $\delta$  7.80 – 7.70 (m, 2H), 7.36 – 7.31 (m, 2H), 7.28 – 7.25 (m, 1H), 7.24 (dd,  $J = 7.1, 0.8$  Hz, 1H), 6.96 – 6.89 (m, 1H), 6.73 (d,  $J = 9.1$  Hz, 1H), 6.17 – 6.05 (m, 1H), 5.01 (s, 1H), 1.65 (s, 6H);  $^{13}\text{C NMR}$  (150 MHz,  $\text{CDCl}_3$ )  $\delta$  151.5, 142.1, 139.0, 133.6, 131.4, 128.0, 127.5, 125.6, 124.3, 108.9, 103.3, 59.1, 31.3.

**HRMS (ESI)** calcd for  $[\text{M}+\text{H}]^+$   $\text{C}_{16}\text{H}_{17}\text{N}_2$ ,  $m/z$ : 237.1386, found: 237.1387, Error -0.4 ppm.

**IR (KBr)**: 2971, 1641, 1527, 1395, 754  $\text{cm}^{-1}$ .

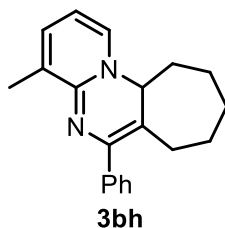

**4-methyl-6-phenyl-7,8,9,10,11,11a-hexahydrocyclohepta[e]pyrido[1,2-a]pyrimidine (3bh)**

Obtained as yellow liquid (38.5 mg, 66% yield);  $^1\text{H NMR}$  (600 MHz,  $\text{CDCl}_3$ )  $\delta$  7.49 (d,  $J = 7.7$  Hz, 2H), 7.33 (t,  $J = 7.5$  Hz, 2H), 7.25 (t,  $J = 7.4$  Hz, 1H), 6.86 (d,  $J = 6.6$  Hz, 2H), 6.08 (t,  $J = 6.7$  Hz, 1H), 4.42 (dd,  $J = 11.3, 4.1$  Hz, 1H), 2.74 – 2.66 (m, 1H), 2.18 (s, 3H), 2.08 – 1.99 (m, 1H), 1.99 – 1.92 (m, 1H), 1.89 – 1.83 (m, 1H), 1.82 – 1.76 (m, 1H), 1.74 – 1.64 (m, 3H), 1.61 – 1.53 (m, 1H), 1.47 – 1.37 (m, 1H);  $^{13}\text{C NMR}$  (150 MHz,  $\text{CDCl}_3$ )  $\delta$  148.6, 140.5, 140.3, 132.5, 131.5, 130.7, 129.0, 127.6, 126.9, 109.1, 108.0, 64.9, 35.3, 29.9, 28.9, 26.3, 25.9, 18.0.

**HRMS (ESI)** calcd for  $[\text{M}+\text{H}]^+$   $\text{C}_{20}\text{H}_{23}\text{N}_2$ ,  $m/z$ : 291.1856, found: 291.1842, Error 4.7 ppm.

**IR (KBr)**: 2925, 1635, 1525, 743, 701  $\text{cm}^{-1}$ .

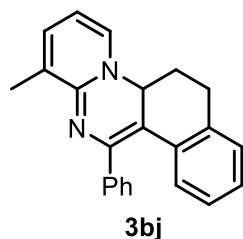

#### 1-methyl-12-phenyl-5a,6-dihydro-7H-benzo[f]pyrido[1,2-a]quinazoline (**3bj**)

Obtained as yellow solid (48.2 mg, 74% yield)  $^1\text{H NMR}$  (400 MHz,  $\text{CD}_2\text{Cl}_2$ )  $\delta$  7.43 – 7.36 (m, 2H), 7.28 – 7.20 (m, 3H), 7.05 (d,  $J = 7.5$  Hz, 1H), 7.00 (d,  $J = 6.9$  Hz, 1H), 6.98 – 6.90 (m, 2H), 6.69 (t,  $J = 7.5$  Hz, 1H), 6.62 (d,  $J = 7.7$  Hz, 1H), 6.17 (t,  $J = 6.8$  Hz, 1H), 4.78 (dd,  $J = 11.7, 4.0$  Hz, 1H), 3.09 – 2.98 (m, 2H), 2.56 – 2.48 (m, 1H), 2.45 – 2.33 (m, 1H), 2.15 (s, 3H);  $^{13}\text{C NMR}$  (100 MHz,  $\text{CD}_2\text{Cl}_2$ )  $\delta$  150.1, 141.7, 141.3, 136.2, 134.8, 132.6, 131.2, 131.1, 129.8, 128.9, 128.2, 127.8, 127.2, 125.2, 124.6, 108.7, 104.8, 60.1, 31.2, 28.7, 18.1.

**HRMS (ESI)** calcd for  $[\text{M}+\text{H}]^+$   $\text{C}_{23}\text{H}_{21}\text{N}_2$ ,  $m/z$ : 325.1699, found: 325.1711, Error -3.7 ppm.

## 4. Mechanistic studies

### 4.1 Cat E catalyzed C-H vinylation/ $6\pi$ -electrocyclization of **1a** with **2a**

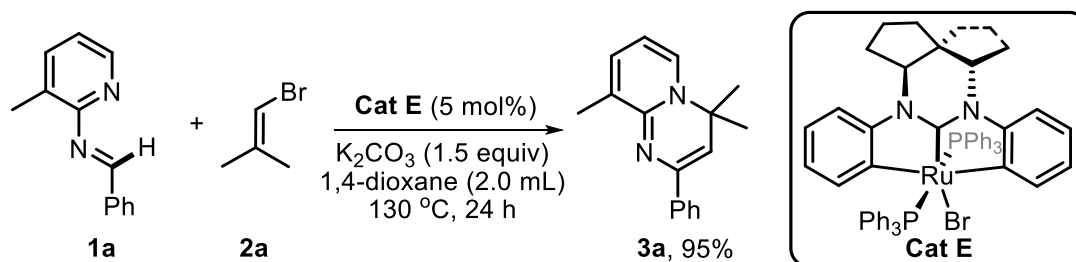

In glove box, to dry 1,4-dioxane (2 mL) were added substrate **1** (39.3mg, 0.2 mmol), substrate **2** (54.0 mg, 0.4 mmol),  $\text{K}_2\text{CO}_3$  (41.2 mg, 0.3 mmol) and **Cat E** (10.2 mg, 5 mol%) in a 10 mL oven-dried Schlenk tube. Then the tube was sealed and the mixture was stirred at 130 °C for 24 h. After the reaction was completed, the resulting solution was concentrated in vacuo, and the residual was purified by silica gel column chromatography to give the product **3a** (47.5 mg, 95% yield). (**Note:** The **Cat E** was prepared according to our reported methods <sup>[9]</sup>).

### 4.2 Radical inhibition experiment

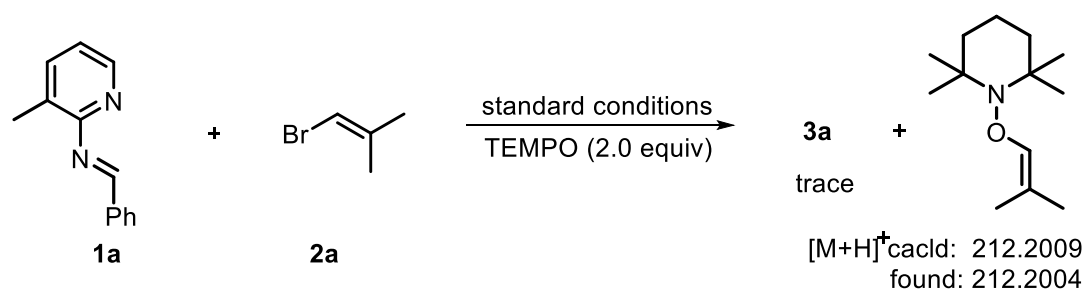

In glove box, to dry 1,4-dioxane (2 mL) were added substrate **1a** (39.3 mg, 0.2 mmol), substrate **2a** (54.0 mg, 0.4 mmol),  $\text{K}_2\text{CO}_3$  (41.5 mg, 0.3 mmol), **Cat B** (5 mol%) and TEMPO (62.5 mg, 0.4 mmol, 2.0

equiv) in a 10 mL oven-dried Schlenk tube. Then the tube was sealed and the mixture was stirred at 130 °C for 24 h. The reaction mixture was then analyzed by HRMS and the result is shown above.

#### 4.3 Synthesis of *N*-(3-methylpyridin-2-yl)-1-phenylmethanimine-*d* (**D-1a**)

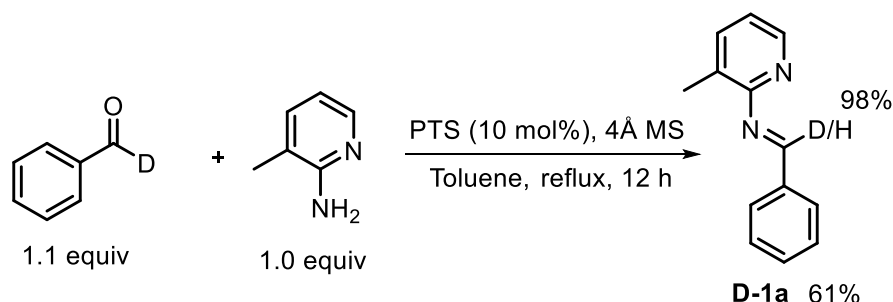

To a dry round-bottom flask equipped with a Dean-Stark apparatus were added anhydrous toluene (10 mL), 3-methylpyridin-2-amine (324.4 mg, 3.0 mmol, 1.0 equiv), D-benzaldehyde (353.5 mg, 3.3 mmol, 1.1 equiv), *p*-toluenesulfonic acid (PTS, 51.7 mg, 10 mol%) and 4Å MS (0.5 g). The reaction mixture was refluxed for 12 h under Dean-Stark conditions and then cooled to room temperature. The molecular sieve was removed by filtration. The solvent was evaporated in vacuo, and the residual was purified by silica gel column chromatography to give the product **D-1a** (98% D).

*N*-(3-methylpyridin-2-yl)-1-phenylmethanimine-*d* (**D-1a**)<sup>[2]</sup>

<sup>1</sup>H NMR (400 MHz, CDCl<sub>3</sub>) δ 8.35 – 8.23 (m, 1H), 8.05 – 7.94 (m, 2H), 7.54 – 7.51 (M, 1H), 7.49 – 7.43 (m, 3H), 7.07 (dd, *J* = 7.4, 4.8 Hz, 1H), 2.45 (s, 3H).

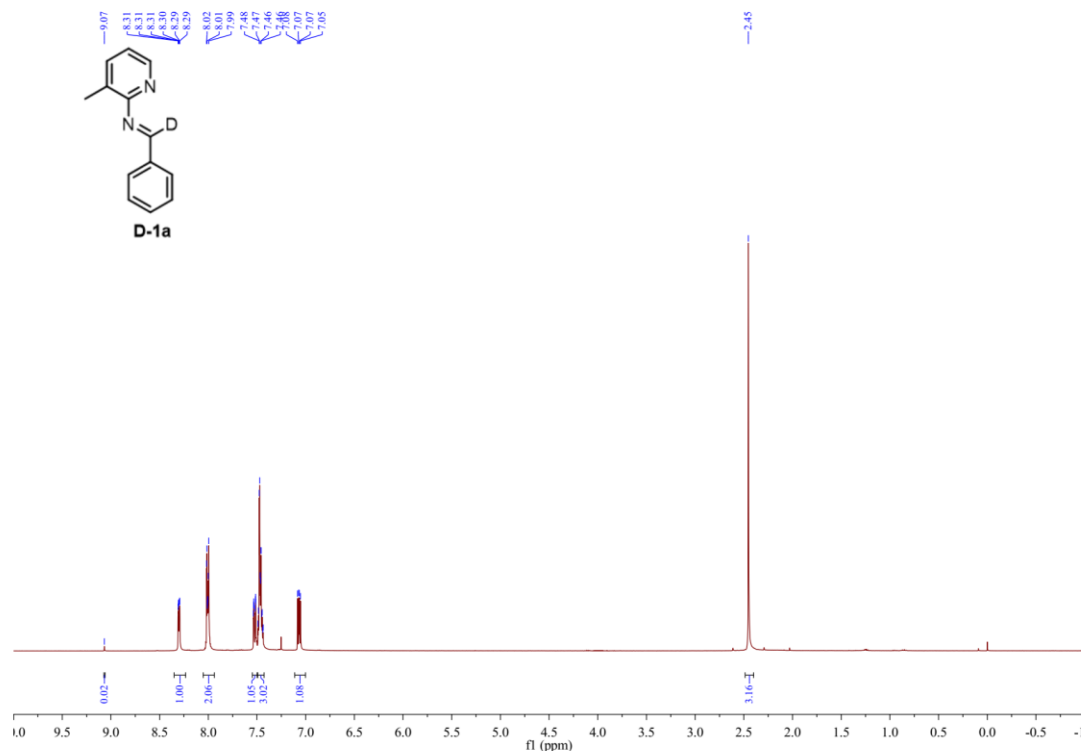

#### 4.4 KIE determined from parallel reactions

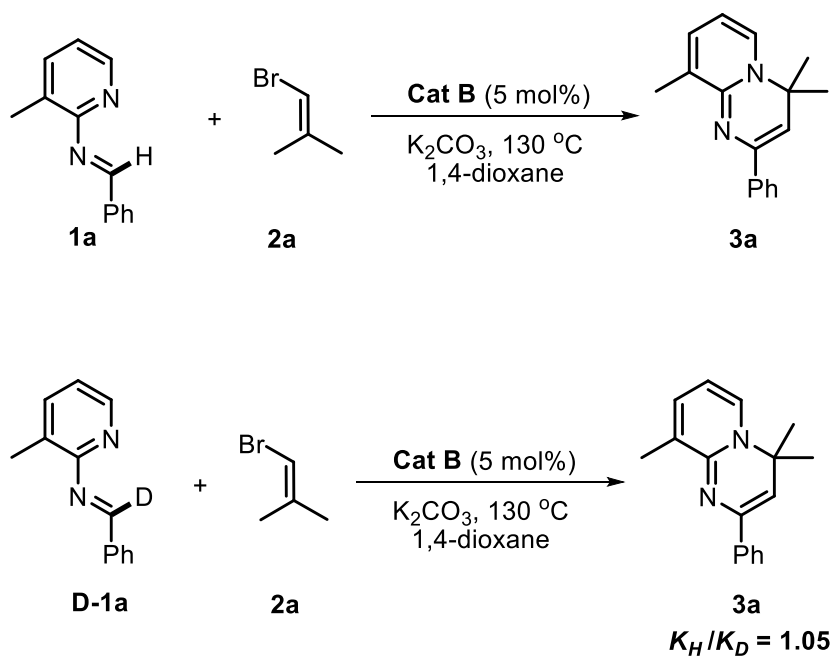

In glove box, to dry 1,4-dioxane (2 mL) were added  $\text{K}_2\text{CO}_3$  (41.5 mg, 0.3 mmol, 1.5 equiv), **Cat B** (9.8 mg, 5 mol%), substrate **1a** (39.3 mg, 0.2 mmol, 1.0 equiv) or **D-1a** (39.5 mg, 0.2 mmol, 1.0 equiv), and **2a** (54.0 mg, 0.4 mmol, 2.0 equiv) in a 10 mL oven-dried Schlenk tube. The reaction system was stirred at 130 °C and quenched after reacting for 0.5 h, 1 h, 1.5 h and 2 h respectively. Yield was determined by  $^1\text{H}$  NMR with 1,3,5-trimethoxybenzene as internal standard.

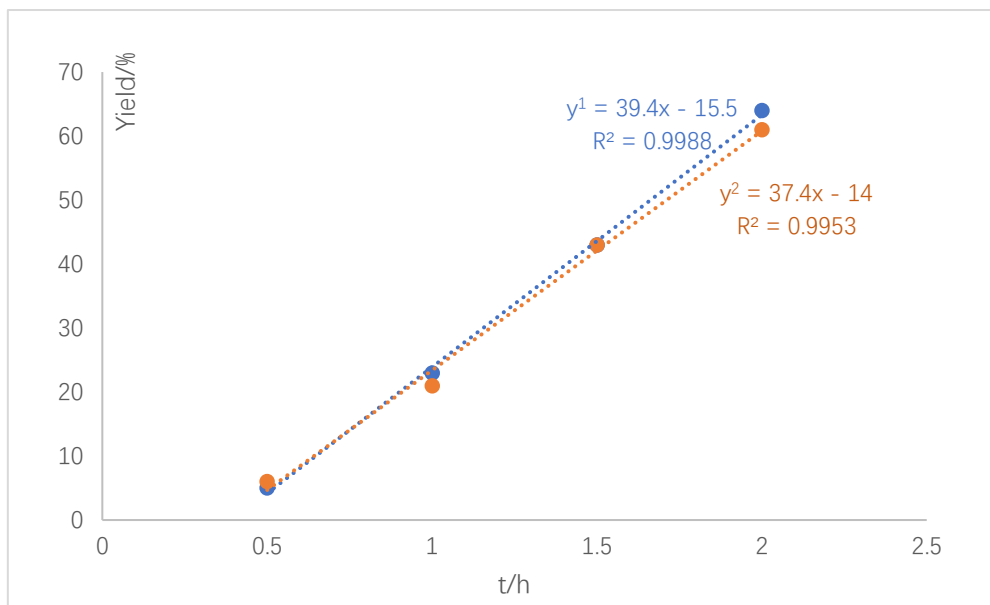

**Figure S1** KIE from parallel reactions of **1a/D-1a** was determined to  $k_H/k_D = 1.05$



## 4.5 Competition experiment

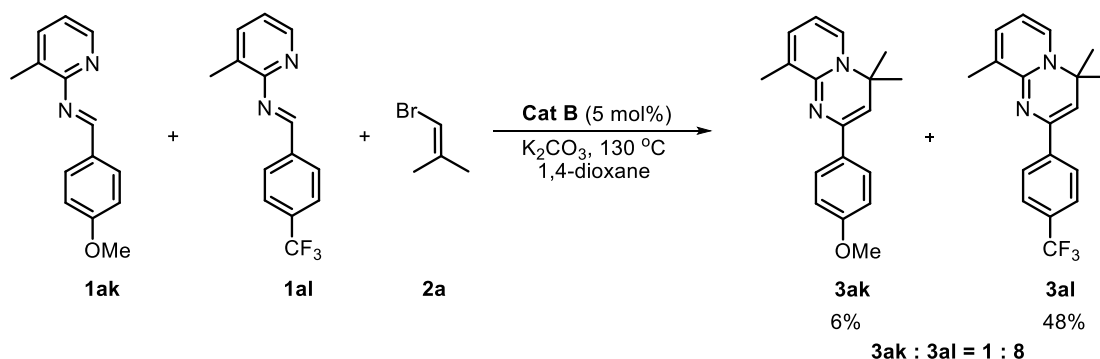

In glove box, to dry 1,4-dioxane (2 mL) were added **1ak** (45.3 mg, 0.2 mmol), **1al** (52.9 mg, 0.2 mmol), **2a** (54.0 mg, 0.4 mmol)  $\text{K}_2\text{CO}_3$  (41.5 mg, 0.3 mmol) and **Cat B** (9.8 mg, 5 mol%) in a 10 mL oven-dried Schlenk tube. The tube was taken out from the glove box, placed in a preheated oil bath (130 °C) and reacted for 3 h under stirring. After that, the mixture was cooled to room temperature. Analysis of the crude using  $^1\text{H}$  NMR with 1,3,5-trimethoxybenzene as internal standard, with reference to the spectra of pure compounds, showed the formation of **3ak** (6%) and **3al** (48%).

## 5. In Situ HRMS experiments

### 5.1 In situ HRMS analysis of the reaction system of **1a** with **2a** and **Cat B**

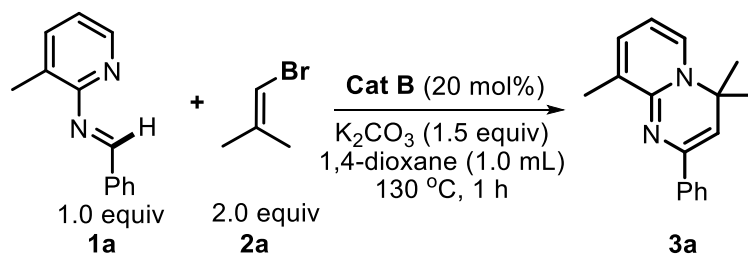

In glove box, to dry 1,4-dioxane (1.0 mL) were added *N*-(3-methylpyridin-2-yl)-1-phenylethanimine **1a** (19.6 mg, 0.1 mmol, 1.0 equiv), **2a** (27.0 mg, 0.2 mmol, 2.0 equiv),  $\text{K}_2\text{CO}_3$  (20.8 mg, 0.15 mmol, 1.5 equiv) and **Cat B** (19.5 mg, 0.02 mmol, 0.2 equiv) in a 10 mL oven-dried Schlenk tube. Then the tube was sealed and the mixture was stirred at 130 °C for 1 h. The reaction was cooled to room temperature and diluted with MeOH prior to the injection into the mass spectrometer.

The positive-ion mode of ESI-MS showed the peaks corresponding to the **Cat E** ( $m/z$  calcd: 1019.1833, found:1019.1825), **I** ( $m/z$  calcd: 757.0921, found:757.0916), **III** ( $m/z$  calcd: 611.1749, found: 611.1755), **IV** ( $m/z$  calcd: 873.2660, found:873.2666) and **VI** ( $m/z$  calcd: 667.2375, found: 667.2376).

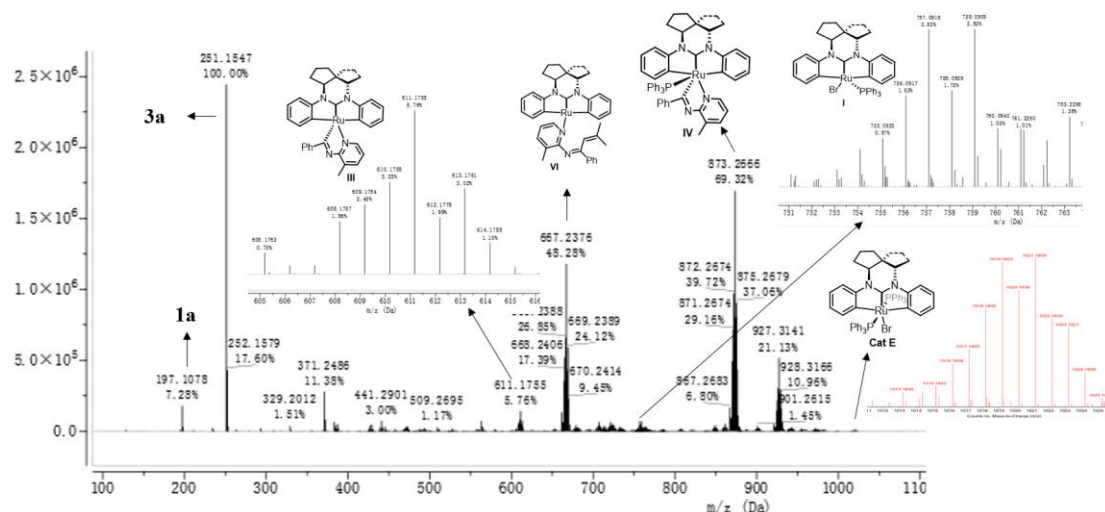

**Figure S2** In situ ESI-MS of the reaction system of **1a** with **2a** and **Cat B**

### 5.2 In situ HRMS analysis of the reaction system of **D-1a** with **2a** and **Cat B**

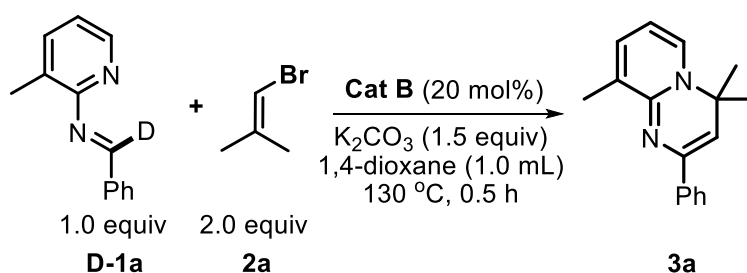

In glove box, to dry 1,4-dioxane (1.0 mL) were added *N*-(3-methylpyridin-2-yl)-1-phenylmethanimine-*d* **D-1a** (19.7 mg, 0.1 mmol, 1.0 equiv), **2a** (27.0 mg, 0.2 mmol, 2.0 equiv),  $\text{K}_2\text{CO}_3$  (20.8 mg, 0.15 mmol, 1.5 equiv) and **Cat B** (19.5 mg, 0.02 mmol, 0.2 equiv) in a 10 mL oven-dried Schlenk tube. Then the tube was sealed and the mixture was stirred at 130 °C for 0.5 h. The reaction was cooled to room temperature and diluted with MeOH prior to the injection into the mass spectrometer.

The positive-ion mode of ESI-MS showed the peaks corresponding to the **D-IV** ( $m/z$  calcd: 874.2723, found:875.2723) and **2D-IV** ( $m/z$  calcd: 875.2786, found:875.2771).

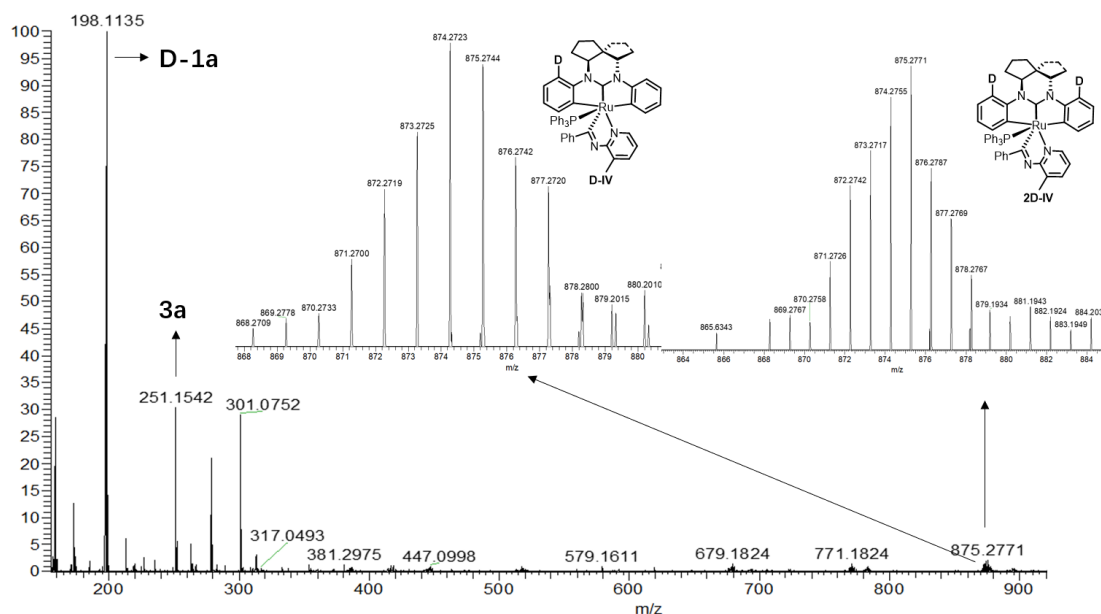

**Figure S3** In situ ESI-MS of the reaction system of **D-1a** with **2a** and **Cat B**

### 5.3 In situ HRMS analysis of the reaction system of **1a** with **2a** and **Cat E**

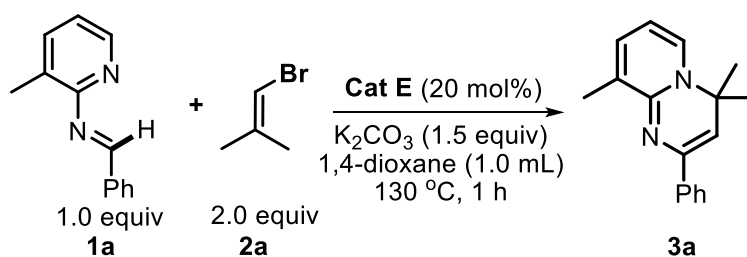

In glove box, to dry 1,4-dioxane (1.0 mL) were added *N*-(3-methylpyridin-2-yl)-1-phenylmethanimine **1a** (9.8 mg, 0.05 mmol, 1.0 equiv), **2a** (13.5 mg, 0.1 mmol, 2.0 equiv),  $K_2CO_3$  (10.4 mg, 0.075 mmol, 1.5 equiv) and **Cat E** (10.3 mg, 0.01 mmol, 0.2 equiv) in a 10 mL oven-dried Schlenk tube. Then the tube was sealed and the mixture was stirred at 130 °C for 1 h. The reaction was cooled to room temperature and diluted with MeOH prior to the injection into the mass spectrometer.

The positive-ion mode of ESI-MS showed the peaks corresponding to the, **I** (*m/z* calcd: 757.0921, found:757.0948), **III** (*m/z* calcd: 611.1749, found: 611.1792), **IV** (*m/z* calcd: 873.2660, found:873.2689) and **VI** (*m/z* calcd: 667.2375, found: 667.2393)

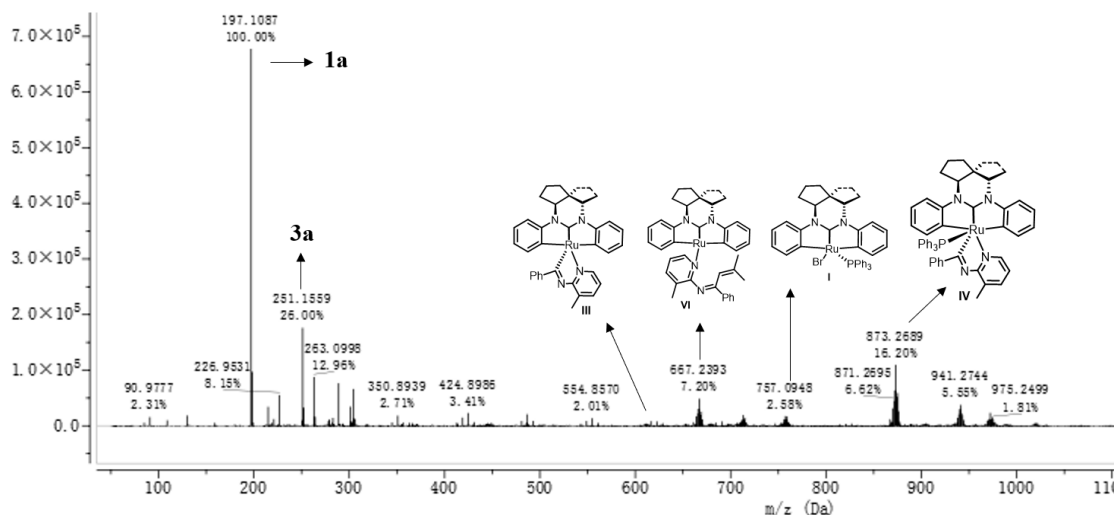

**Figure S4** In situ ESI-MS of the reaction system of **1a** with **2a** and **Cat E**

#### 5.4 In situ HRMS analysis of the reaction system of **D-1a** with **2a** and **Cat E**

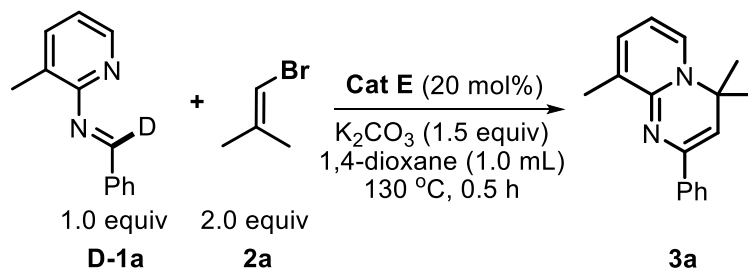

In glove box, to dry 1,4-dioxane (1.0 mL) were added *N*-(3-methylpyridin-2-yl)-1-phenylmethanimine-*d* **D-1a** (9.8 mg, 0.05 mmol, 1.0 equiv), **2a** (13.5 mg, 0.1 mmol, 2.0 equiv),  $\text{K}_2\text{CO}_3$  (10.4 mg, 0.075 mmol, 1.5 equiv) and **Cat E** (10.3 mg, 0.01 mmol, 0.2 equiv) in a 10 mL oven-dried Schlenk tube. Then the tube was sealed and the mixture was stirred at 130 °C for 0.5 h. The reaction was cooled to room temperature and diluted with MeOH prior to the injection into the mass spectrometer.

The positive-ion mode of ESI-MS showed the peaks corresponding to the **D-IV** ( $m/z$  calcd: 874.2723, found:875.2732) and **2D-IV** ( $m/z$  calcd: 875.2786, found:875.2773).

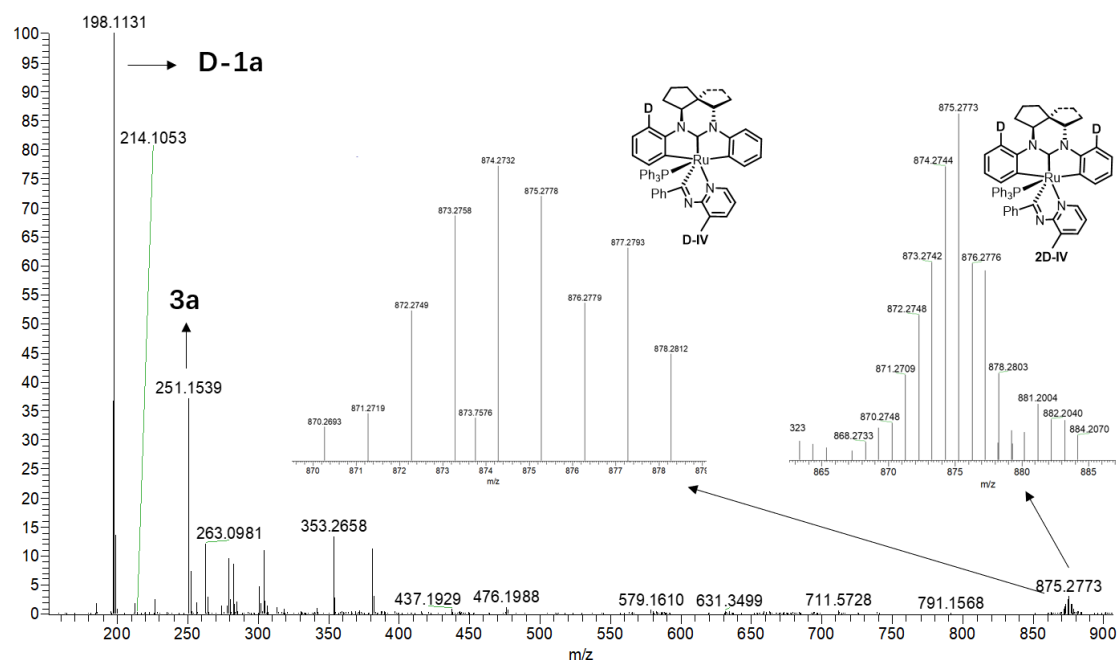

**Figure S5** In situ ESI-MS of the reaction system of **D-1a** with **2a** and **Cat E**

### 5.5 In situ HRMS analysis of the reaction system of **1a** with **Cat E**

In glove box, to dry 1,4-dioxane (0.5 mL) were added *N*-(3-methylpyridin-2-yl)-1-phenylmethanimine **1a** (3.9 mg, 0.02 mmol, 1.0 equiv),  $K_2CO_3$  (4.1 mg, 0.03 mmol, 1.5 equiv) and **Cat E** (20.4 mg, 0.02 mmol, 1.0 equiv) in a 10 mL oven-dried Schlenk tube. Then the tube was sealed and the mixture was stirred at 130 °C for 3 h. The reaction was cooled to room temperature and diluted with MeOH prior to the injection into the mass spectrometer.

The positive-ion mode of ESI-MS showed the peaks corresponding to the **IV** ( $m/z$  calcd: 873.2660, found:873.2660).

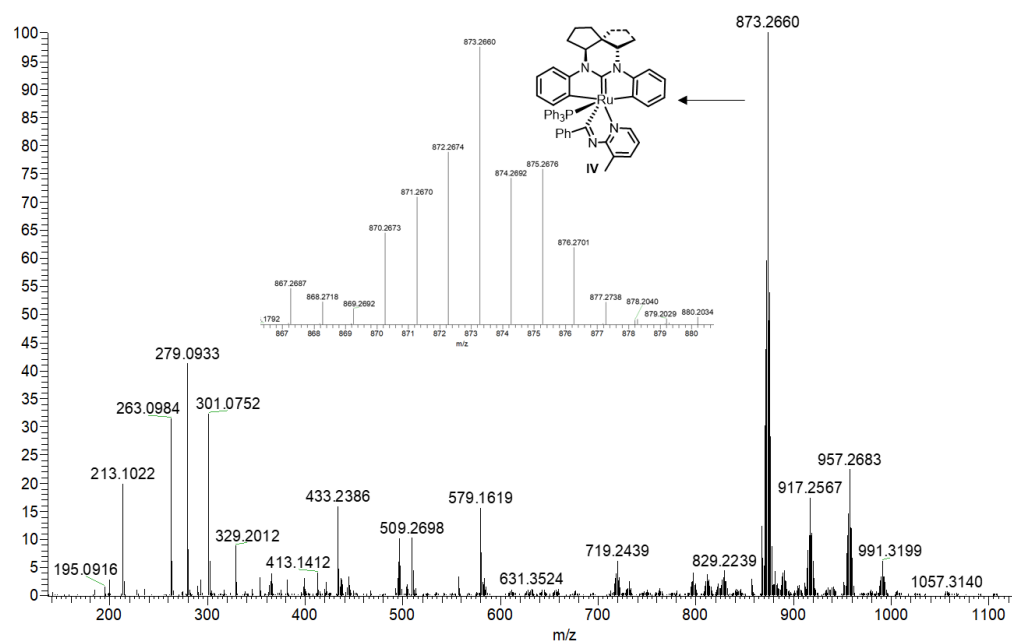

**Figure S6** In situ ESI-MS of the reaction system of **1a** with **Cat E**

## 5.6 In situ HRMS analysis of the reaction system of D-1a with Cat E

In glove box, to dry 1,4-dioxane (0.5 mL) were added *N*-(3-methylpyridin-2-yl)-1-phenylmethanimine-*d* **D-1a** (3.9 mg, 0.02 mmol, 1.0 equiv), K<sub>2</sub>CO<sub>3</sub> (4.1 mg, 0.03 mmol, 1.5 equiv) and **Cat E** (20.4 mg, 0.02 mmol, 1.0 equiv) in a 10 mL oven-dried Schlenk tube. Then the tube was sealed and the mixture was stirred at 130 °C for 3 h. The reaction was cooled to room temperature and diluted with MeOH prior to the injection into the mass spectrometer.

The positive-ion mode of ESI-MS showed the peaks corresponding to the **D-IV** (*m/z* calcd: 874.2723, found:874.2731).

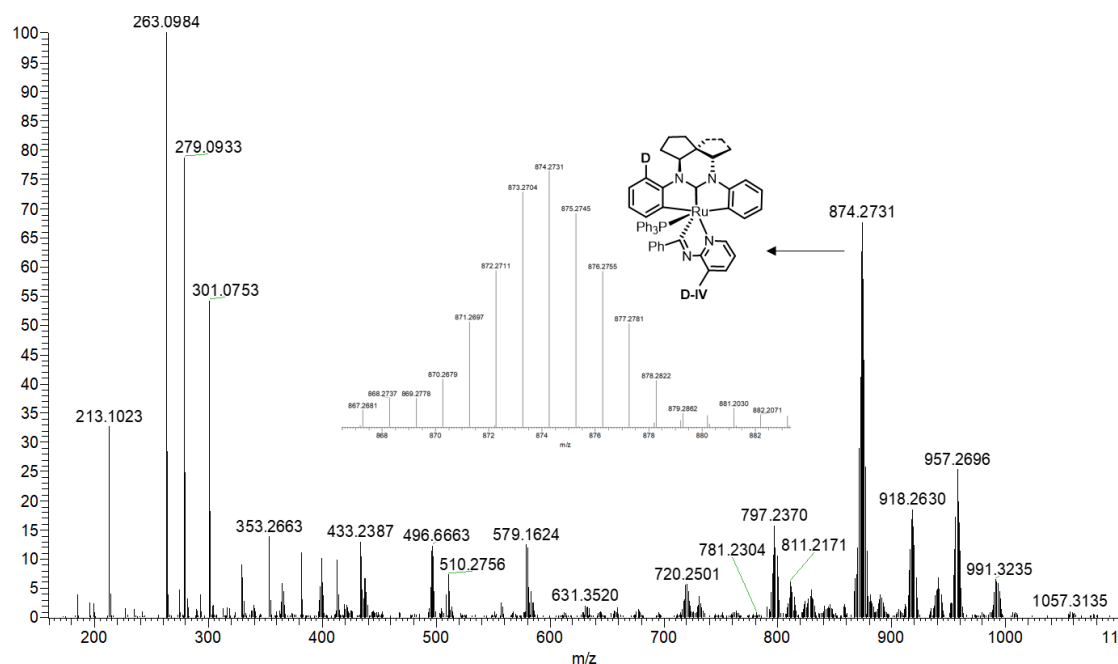

Figure S7 In situ ESI-MS of the reaction system of **D-1a** with **Cat E**

## 6. DFT calculations

### 6.1. Computational methods

All the DFT calculations were carried out by using Gaussian 09, Rev. D01.<sup>[11]</sup> The B3LYP functional<sup>[12]</sup> was applied to execute the structural optimizations and single point energy calculations, notably Grimme's D3 empirical dispersion term<sup>[13]</sup> was used during the single point energy calculations. C, H, N, O, K, P, Br and Ru atoms were described by Def2-SVP<sup>[14,15]</sup> basis set to obtain the optimized geometries and thermal correction of free energy data, while Def2-TZVP<sup>[16]</sup> basis set was used to get single point energy. The solvation effect of 1,4-Dioxane was stimulated by using SMD<sup>[17]</sup> continuum solvation model. In addition, the temperature was set to 403.15 K during the calculations according to the experimental condition. For all the geometry optimizations, analysis of vibrational frequency was done to ensure there were no imaginary frequencies for the intermediates and only one imaginary frequency for each transition state.

### 6.2. Cartesian Coordinates and energies

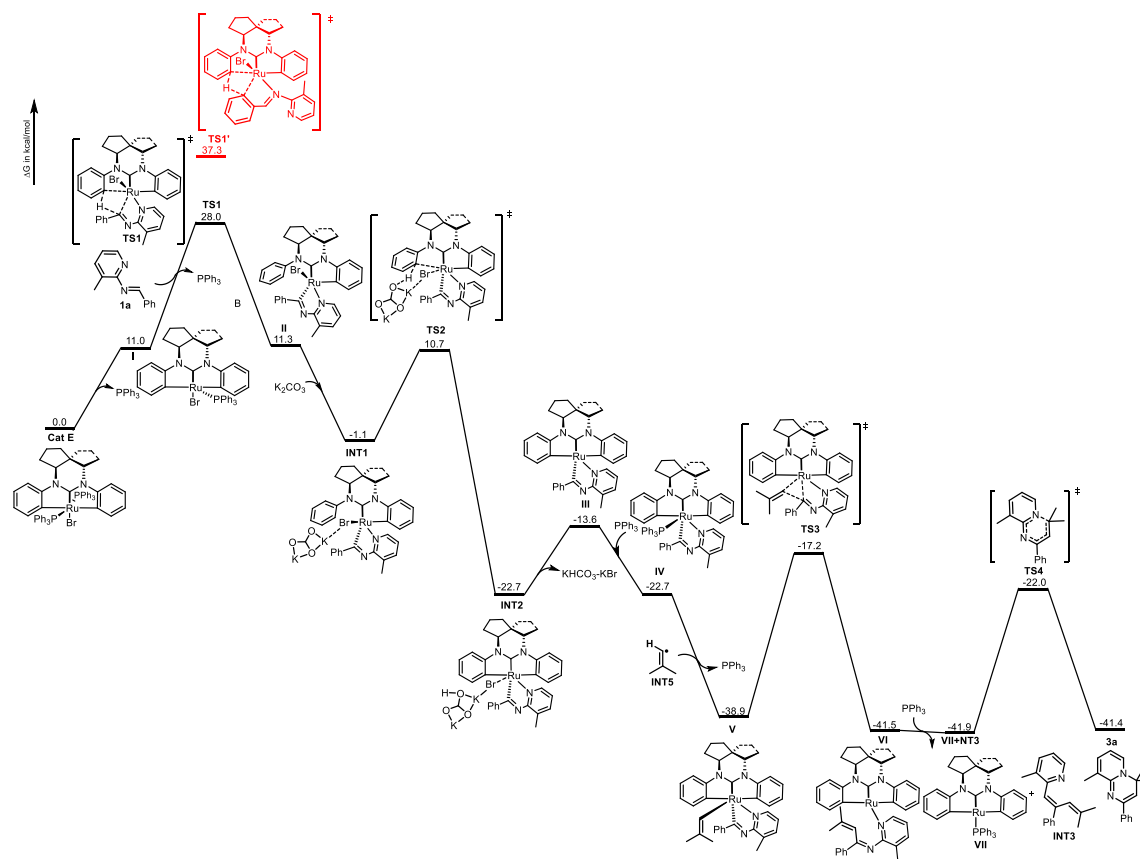

**Figure S8** Energy profile of the Ru-catalyzed C–H vinylation/6 $\pi$ -electrocyclization of **1a**

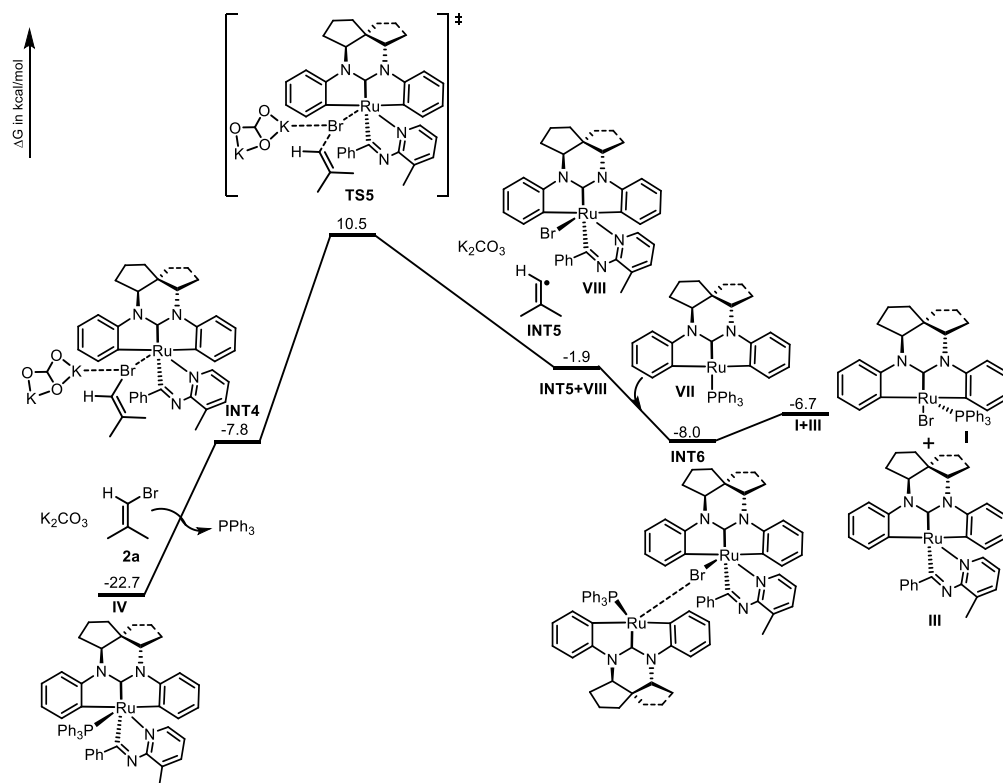

**Figure S9** Energy profile for generation of the vinyl radical

## Cartesian Coordinates

### Cat E

|    |             |             |             |
|----|-------------|-------------|-------------|
| Ru | 0.00475900  | -0.54369300 | -0.02867200 |
| P  | -2.42559500 | -0.81682000 | 0.03231800  |
| P  | 2.47273800  | -0.70006500 | -0.19342100 |
| N  | 0.11372700  | 2.03201600  | 1.43621100  |
| N  | -0.13204100 | 2.31679800  | -0.86846800 |
| C  | -0.35807800 | 4.34002300  | 0.62663900  |
| C  | 0.41545300  | 5.66983300  | 0.78532600  |
| H  | 0.00512800  | 6.20794500  | 1.65700400  |
| H  | 0.30743800  | 6.33829600  | -0.08270500 |
| C  | 1.87483700  | 5.26408100  | 1.05054200  |
| H  | 2.41952400  | 5.14988100  | 0.10095100  |
| H  | 2.41410200  | 6.02950300  | 1.62914000  |
| C  | 1.79754100  | 3.90339000  | 1.78282100  |
| H  | 2.11122600  | 3.97923100  | 2.83467500  |
| H  | 2.45096600  | 3.15671000  | 1.31256700  |
| C  | 0.31048000  | 3.45701600  | 1.68756000  |
| H  | -0.19329300 | 3.68305500  | 2.63766700  |
| C  | -1.87755100 | 4.50517500  | 0.80471600  |
| H  | -2.12658300 | 5.12894700  | 1.67822400  |
| H  | -2.34666300 | 3.51892100  | 0.95940500  |
| C  | -2.32757700 | 5.10056800  | -0.52855000 |
| H  | -2.12130800 | 6.18310200  | -0.54728700 |
| H  | -3.40389400 | 4.97406000  | -0.71618900 |
| C  | -1.46617300 | 4.36005100  | -1.57246200 |
| H  | -2.03330100 | 3.52925600  | -2.00823400 |
| H  | -1.17339900 | 5.01821300  | -2.40377400 |
| C  | -0.21270100 | 3.79730000  | -0.82260800 |
| H  | 0.71540700  | 4.17370200  | -1.28205100 |
| C  | -0.01625500 | 1.49364200  | 0.20282500  |
| C  | 0.19502300  | 1.08888900  | 2.49589500  |
| C  | 0.32817900  | 1.45833100  | 3.84154900  |
| H  | 0.40636200  | 2.50364400  | 4.14428400  |
| C  | 0.36424300  | 0.45757000  | 4.82144800  |
| H  | 0.46652900  | 0.73599700  | 5.87395100  |
| C  | 0.26938500  | -0.88243700 | 4.44467000  |
| H  | 0.29197900  | -1.66961800 | 5.20402500  |
| C  | 0.15319000  | -1.22924000 | 3.09019700  |
| H  | 0.09393000  | -2.28455700 | 2.81937500  |
| C  | 0.12185600  | -0.25608400 | 2.07927000  |
| C  | -0.09297800 | 1.63562200  | -2.11846700 |
| C  | -0.01737200 | 2.30160000  | -3.34927100 |
| H  | 0.01829700  | 3.38855300  | -3.40819600 |



|   |             |             |             |
|---|-------------|-------------|-------------|
| C | 0.02456700  | 1.55550900  | -4.53406200 |
| H | 0.07903500  | 2.07204300  | -5.49607100 |
| C | -0.00040000 | 0.16342400  | -4.47502100 |
| H | 0.02813200  | -0.42871100 | -5.39425200 |
| C | -0.04170100 | -0.48365200 | -3.22930900 |
| H | -0.03039100 | -1.57416500 | -3.22319800 |
| C | -0.07809100 | 0.22457500  | -2.01846100 |
| C | -3.52056800 | 0.65572200  | -0.33468400 |
| C | -3.51627800 | 1.12764700  | -1.66134900 |
| H | -2.84166900 | 0.68476500  | -2.39624100 |
| C | -4.39433600 | 2.13467100  | -2.06637000 |
| H | -4.38464700 | 2.46963000  | -3.10688100 |
| C | -5.28724400 | 2.70337500  | -1.15150200 |
| H | -5.98095700 | 3.48563400  | -1.47077900 |
| C | -5.29108200 | 2.25375000  | 0.17001800  |
| H | -5.98856500 | 2.68201100  | 0.89498400  |
| C | -4.41894900 | 1.23549900  | 0.57510900  |
| H | -4.47546600 | 0.87969000  | 1.60317200  |
| C | -3.23351600 | -1.97457100 | -1.19669200 |
| C | -4.64060600 | -2.03651600 | -1.24514200 |
| H | -5.24139800 | -1.43142400 | -0.56305200 |
| C | -5.28974500 | -2.86685100 | -2.15928600 |
| C | -4.54586100 | -3.64566300 | -3.05282900 |
| H | -5.05349000 | -4.29308300 | -3.77301200 |
| C | -3.15255200 | -3.58986100 | -3.01566700 |
| H | -2.55916100 | -4.19620000 | -3.70515500 |
| C | -2.50111500 | -2.76319200 | -2.09200800 |
| H | -1.41527800 | -2.75508400 | -2.05142100 |
| C | 3.17328300  | -1.52975500 | -1.71792600 |
| C | 2.47031100  | -2.55420100 | -2.37152300 |
| H | 1.49807300  | -2.86594200 | -1.99173400 |
| C | 3.02091400  | -3.20690200 | -3.47930900 |
| H | 2.45426500  | -4.00331800 | -3.96925500 |
| C | 4.28287200  | -2.84740900 | -3.95648300 |
| H | 4.71085500  | -3.35528100 | -4.82502700 |
| C | 4.99686300  | -1.83511000 | -3.30958300 |
| H | 5.98960000  | -1.54726300 | -3.66608300 |
| C | 4.44957300  | -1.18422300 | -2.20104900 |
| H | 5.03407400  | -0.40452100 | -1.71166200 |
| C | 3.30631700  | -1.65902500 | 1.16217700  |
| C | 3.92721700  | -2.89431200 | 0.91110500  |
| H | 3.93883700  | -3.31005300 | -0.09641500 |
| C | 4.53506400  | -3.61192100 | 1.94530300  |
| H | 5.00844900  | -4.57275000 | 1.72634300  |

|    |             |             |             |
|----|-------------|-------------|-------------|
| C  | 4.53821200  | -3.10716600 | 3.24752600  |
| C  | 3.91921700  | -1.88255000 | 3.51067200  |
| H  | 3.90307100  | -1.47962500 | 4.52650600  |
| C  | 3.30012400  | -1.16921200 | 2.48086500  |
| H  | 2.81061000  | -0.22441500 | 2.71610200  |
| C  | 3.45028500  | 0.88941500  | -0.25590100 |
| C  | 4.47990200  | 1.21966700  | 0.63997200  |
| H  | 4.73052300  | 0.55432800  | 1.46559600  |
| C  | 5.22191800  | 2.39610000  | 0.47609300  |
| H  | 6.02067000  | 2.62931200  | 1.18527000  |
| C  | 4.95720100  | 3.25662900  | -0.59069800 |
| H  | 5.54451700  | 4.16911600  | -0.72315200 |
| C  | 3.93986300  | 2.93321400  | -1.49518900 |
| H  | 3.73065700  | 3.58732200  | -2.34607300 |
| C  | 3.19232800  | 1.76564500  | -1.32732600 |
| H  | 2.42388900  | 1.51987700  | -2.06120000 |
| H  | -6.38236700 | -2.90205100 | -2.17575300 |
| H  | 5.01618900  | -3.66782500 | 4.05533500  |
| C  | -3.06749400 | -1.46963800 | 1.64551400  |
| C  | -3.52282500 | -2.79356100 | 1.76579700  |
| C  | -3.03041300 | -0.66826500 | 2.80109100  |
| C  | -3.96268700 | -3.28807300 | 2.99741100  |
| H  | -3.53263800 | -3.45224100 | 0.89732400  |
| C  | -3.48794800 | -1.15784800 | 4.02675900  |
| H  | -2.62837500 | 0.34453300  | 2.75747100  |
| C  | -3.95869400 | -2.46955600 | 4.12904300  |
| H  | -4.30978700 | -4.32237400 | 3.06749300  |
| H  | -3.45501900 | -0.51354900 | 4.90890100  |
| H  | -4.30889400 | -2.85560600 | 5.09010100  |
| Br | 0.06695100  | -3.14801000 | 0.16965000  |

## I

|    |             |             |             |
|----|-------------|-------------|-------------|
| Ru | -0.35755800 | -0.01478600 | -1.31870800 |
| P  | -1.45824600 | -0.03504300 | 0.68149700  |
| N  | 2.04732300  | 1.28781500  | -0.19192200 |
| N  | 2.22217700  | -1.03704300 | -0.28902900 |
| C  | 4.32427600  | 0.32962900  | 0.10676700  |
| C  | 5.31294500  | 0.36809800  | 1.29370200  |
| H  | 5.98942700  | 1.22879300  | 1.15537000  |
| H  | 5.94632200  | -0.53025300 | 1.35915900  |
| C  | 4.43644800  | 0.57902000  | 2.54082800  |
| H  | 4.09089800  | -0.39031900 | 2.93346400  |
| H  | 4.99317200  | 1.06483500  | 3.35641000  |
| C  | 3.22776900  | 1.41537900  | 2.05597600  |

|   |             |             |             |
|---|-------------|-------------|-------------|
| H | 3.24736500  | 2.44322300  | 2.44883400  |
| H | 2.27630200  | 0.97225200  | 2.37887400  |
| C | 3.32180200  | 1.42686400  | 0.50385600  |
| H | 3.76236700  | 2.37696200  | 0.17621400  |
| C | 4.99563800  | 0.57030800  | -1.25883700 |
| H | 5.74895500  | 1.37292500  | -1.21327100 |
| H | 4.23527300  | 0.87619900  | -1.99871100 |
| C | 5.56727300  | -0.79590300 | -1.63044400 |
| H | 6.49595400  | -0.98441200 | -1.06677300 |
| H | 5.81524700  | -0.89005000 | -2.69886500 |
| C | 4.45919200  | -1.77300600 | -1.20194700 |
| H | 3.76617000  | -1.94558900 | -2.03775400 |
| H | 4.85644800  | -2.75643900 | -0.91416100 |
| C | 3.68056000  | -1.08577800 | -0.02878800 |
| H | 3.81289900  | -1.65119100 | 0.90696100  |
| C | 1.48780100  | 0.08521800  | -0.45531800 |
| C | 1.30461600  | 2.40225300  | -0.67190700 |
| C | 1.70822700  | 3.73275800  | -0.51615500 |
| H | 2.60572000  | 4.00028600  | 0.04448900  |
| C | 0.93829200  | 4.74760900  | -1.10350300 |
| H | 1.24994100  | 5.78985100  | -0.99354700 |
| C | -0.20825300 | 4.42492000  | -1.82948400 |
| H | -0.80041400 | 5.21503600  | -2.30032500 |
| C | -0.61392400 | 3.08492500  | -1.94522900 |
| H | -1.52834400 | 2.85190900  | -2.49573100 |
| C | 0.11906900  | 2.04725100  | -1.35186300 |
| C | 1.51823900  | -2.23892200 | -0.60480800 |
| C | 2.03340500  | -3.51686400 | -0.36094800 |
| H | 3.00460600  | -3.65952900 | 0.11384000  |
| C | 1.28313600  | -4.63763900 | -0.74198700 |
| H | 1.68003600  | -5.63974500 | -0.55929900 |
| C | 0.04518800  | -4.46836100 | -1.36181200 |
| H | -0.53430600 | -5.34050200 | -1.67829200 |
| C | -0.46627600 | -3.17758800 | -1.57200900 |
| H | -1.44156600 | -3.07030500 | -2.05109500 |
| C | 0.24441500  | -2.03414100 | -1.17732600 |
| C | -2.67567800 | -1.43085800 | 0.88532800  |
| C | -3.38136500 | -1.92518000 | -0.22376200 |
| H | -3.18733100 | -1.51957000 | -1.21839300 |
| C | -4.34498800 | -2.92542800 | -0.06499600 |
| H | -4.88290700 | -3.29583500 | -0.94160000 |
| C | -4.61622900 | -3.45066000 | 1.20069900  |
| H | -5.36555200 | -4.23744000 | 1.32188600  |
| C | -3.92389400 | -2.96132200 | 2.31144500  |

|    |             |             |             |
|----|-------------|-------------|-------------|
| H  | -4.13074700 | -3.35975100 | 3.30827100  |
| C  | -2.96348000 | -1.95778400 | 2.15773000  |
| H  | -2.44550500 | -1.58616700 | 3.04245200  |
| C  | -2.53005600 | 1.46115500  | 0.92970400  |
| C  | -3.93162600 | 1.36094700  | 0.94985800  |
| H  | -4.41836900 | 0.39276900  | 0.83093300  |
| C  | -4.72434700 | 2.50029100  | 1.12006800  |
| H  | -5.81285000 | 2.40075100  | 1.12731500  |
| C  | -4.13165200 | 3.75413300  | 1.28066100  |
| C  | -2.73811500 | 3.86525700  | 1.26124200  |
| H  | -2.26096800 | 4.84168200  | 1.37582800  |
| C  | -1.94383200 | 2.73192400  | 1.07718600  |
| H  | -0.86034900 | 2.84639300  | 1.04496900  |
| C  | -0.49184300 | -0.17622100 | 2.26262100  |
| C  | -0.57214200 | 0.75881000  | 3.30693100  |
| H  | -1.19687200 | 1.64640600  | 3.20929400  |
| C  | 0.13271700  | 0.55613300  | 4.49955600  |
| H  | 0.05667200  | 1.29626300  | 5.30042900  |
| C  | 0.91625100  | -0.58645000 | 4.67123100  |
| H  | 1.45868200  | -0.74693000 | 5.60665600  |
| C  | 0.99330900  | -1.52990700 | 3.64059300  |
| H  | 1.59000800  | -2.43696500 | 3.76846200  |
| C  | 0.29946800  | -1.32600800 | 2.44635700  |
| H  | 0.35276200  | -2.08431800 | 1.66358600  |
| H  | -4.75247000 | 4.64380100  | 1.41543300  |
| Br | -2.12145600 | -0.05552500 | -3.11317800 |

**TS1**

|    |             |             |             |
|----|-------------|-------------|-------------|
| Ru | -0.80754900 | -0.51638300 | -0.17295300 |
| N  | 1.70188000  | 0.80262700  | -0.95742600 |
| N  | 1.96889400  | -0.72083200 | 0.79296800  |
| C  | 4.02778600  | 0.05057200  | -0.46909200 |
| C  | 5.27419400  | 0.83008300  | 0.00911800  |
| H  | 5.85572100  | 1.13904700  | -0.87634200 |
| H  | 5.94539300  | 0.22718000  | 0.64027100  |
| C  | 4.71430700  | 2.06636500  | 0.73049100  |
| H  | 4.47113000  | 1.81790500  | 1.77645800  |
| H  | 5.44215800  | 2.89103200  | 0.76708800  |
| C  | 3.42798400  | 2.43393000  | -0.04489500 |
| H  | 3.57056700  | 3.32560000  | -0.67356200 |
| H  | 2.58817200  | 2.65840700  | 0.62748800  |
| C  | 3.10787900  | 1.19586600  | -0.93457100 |
| H  | 3.39109300  | 1.41547100  | -1.97267200 |
| C  | 4.33178700  | -0.98327500 | -1.57111000 |

|   |             |             |             |
|---|-------------|-------------|-------------|
| H | 5.03826800  | -0.59037400 | -2.31968400 |
| H | 3.40017800  | -1.24657500 | -2.10080700 |
| C | 4.85378600  | -2.19566600 | -0.80315500 |
| H | 5.89973100  | -2.03063200 | -0.49503400 |
| H | 4.83357900  | -3.12546200 | -1.39185600 |
| C | 3.92695800  | -2.26554700 | 0.42247800  |
| H | 3.05063400  | -2.88880900 | 0.19314200  |
| H | 4.42188900  | -2.71350100 | 1.29591100  |
| C | 3.44436400  | -0.80260600 | 0.70315000  |
| H | 3.83965500  | -0.44091300 | 1.66511600  |
| C | 1.16733600  | -0.07300900 | -0.08790700 |
| C | 0.76083700  | 1.41108200  | -1.82755600 |
| C | 1.09601900  | 2.35779300  | -2.80194200 |
| H | 2.12467700  | 2.69306700  | -2.94366600 |
| C | 0.08285700  | 2.88845700  | -3.60951400 |
| H | 0.33777900  | 3.62724000  | -4.37388200 |
| C | -1.24178000 | 2.48450200  | -3.43440800 |
| H | -2.03104500 | 2.90075700  | -4.06670900 |
| C | -1.56313000 | 1.54978800  | -2.43806400 |
| H | -2.60772900 | 1.25588100  | -2.30479000 |
| C | -0.56898400 | 0.98649700  | -1.63265200 |
| C | 1.26996100  | -1.48252300 | 1.76088300  |
| C | 1.89524600  | -2.17105700 | 2.80838700  |
| H | 2.97673100  | -2.14329100 | 2.93725200  |
| C | 1.11947400  | -2.91501100 | 3.70559300  |
| H | 1.61331800  | -3.45144500 | 4.51990400  |
| C | -0.26721700 | -2.97411700 | 3.56538500  |
| H | -0.86900800 | -3.56404600 | 4.26154700  |
| C | -0.89034500 | -2.25744900 | 2.53417100  |
| H | -1.97961100 | -2.28565500 | 2.44487900  |
| C | -0.13609600 | -1.51627400 | 1.61756000  |
| C | -5.12437600 | -0.22054200 | 0.20763400  |
| C | -3.71142100 | -0.07977500 | 0.19815800  |
| C | -3.43538000 | -2.13474200 | -0.89277400 |
| C | -4.80660500 | -2.34470600 | -0.92085700 |
| C | -5.65282200 | -1.37623700 | -0.36363700 |
| H | -2.72489900 | -2.84580200 | -1.31991400 |
| H | -5.20718300 | -3.25351100 | -1.37359300 |
| H | -6.73633400 | -1.52384700 | -0.37507600 |
| N | -3.12615800 | 1.03222900  | 0.74427900  |
| N | -2.89820200 | -1.02853900 | -0.34431500 |
| C | -5.98610300 | 0.84789200  | 0.81922900  |
| H | -5.84883800 | 1.81393400  | 0.30694400  |
| H | -5.72114500 | 1.01979600  | 1.87465400  |

|    |             |             |             |
|----|-------------|-------------|-------------|
| H  | -7.05060800 | 0.57536600  | 0.76624800  |
| C  | -1.82289800 | 1.07763100  | 0.78266700  |
| H  | -1.04723400 | -0.15879400 | 1.39558800  |
| C  | -1.21824700 | 2.30041600  | 1.37484500  |
| C  | -0.00544000 | 2.26682900  | 2.08558000  |
| C  | -1.89447300 | 3.53195700  | 1.26010600  |
| C  | 0.50929400  | 3.42435000  | 2.67543100  |
| H  | 0.52749700  | 1.32273200  | 2.20354300  |
| C  | -1.36629400 | 4.69089100  | 1.82624900  |
| H  | -2.83853800 | 3.56149300  | 0.71442900  |
| C  | -0.16365900 | 4.64184700  | 2.54076200  |
| H  | 1.44158500  | 3.37369500  | 3.24405700  |
| H  | -1.89767600 | 5.63973200  | 1.71382000  |
| H  | 0.24593100  | 5.54946800  | 2.99201400  |
| Br | -0.09649600 | -2.39679900 | -1.78759600 |

**TS1'**

|    |             |             |             |
|----|-------------|-------------|-------------|
| Ru | -0.59360100 | 0.18826200  | 0.09391200  |
| N  | 2.13391500  | 0.90566500  | -0.66237900 |
| N  | 2.02128800  | -0.99848700 | 0.68584100  |
| C  | 4.13940300  | -0.55313100 | -0.61722700 |
| C  | 5.60143900  | -0.30940900 | -0.18158900 |
| H  | 6.17750500  | 0.00857900  | -1.06652300 |
| H  | 6.09067700  | -1.21532300 | 0.20792200  |
| C  | 5.54453300  | 0.83449600  | 0.85499200  |
| H  | 5.51296200  | 0.43271400  | 1.87954800  |
| H  | 6.44222300  | 1.46838900  | 0.80017500  |
| C  | 4.24432300  | 1.62017800  | 0.54509800  |
| H  | 4.42765700  | 2.67838000  | 0.30772400  |
| H  | 3.55809100  | 1.60452700  | 1.40542500  |
| C  | 3.59143400  | 0.88144200  | -0.65242200 |
| H  | 3.93543400  | 1.33071400  | -1.59436000 |
| C  | 4.00691800  | -1.31603100 | -1.94801400 |
| H  | 4.73138900  | -0.96485800 | -2.70006900 |
| H  | 2.99626800  | -1.16393500 | -2.36377400 |
| C  | 4.19056600  | -2.77990700 | -1.54879100 |
| H  | 5.26032600  | -3.00300900 | -1.40150500 |
| H  | 3.81539800  | -3.48507900 | -2.30600600 |
| C  | 3.42112400  | -2.89345100 | -0.21913100 |
| H  | 2.38612000  | -3.21055200 | -0.40896700 |
| H  | 3.86695600  | -3.63743700 | 0.45675600  |
| C  | 3.40282500  | -1.46194000 | 0.41571800  |
| H  | 3.93495000  | -1.45279900 | 1.37956100  |
| C  | 1.39986800  | 0.02009700  | 0.03771200  |

|   |             |             |             |
|---|-------------|-------------|-------------|
| C | 1.37989100  | 1.96208600  | -1.23614100 |
| C | 1.94210800  | 3.00441400  | -1.98103600 |
| H | 3.01472900  | 3.05212100  | -2.17743600 |
| C | 1.10549000  | 4.01136900  | -2.47796900 |
| H | 1.53672800  | 4.82852500  | -3.06228900 |
| C | -0.26566100 | 3.97786700  | -2.21714800 |
| H | -0.91594800 | 4.77024800  | -2.59884500 |
| C | -0.80874100 | 2.93143900  | -1.45568900 |
| H | -1.88182400 | 2.93347600  | -1.24667000 |
| C | -0.00618700 | 1.89180000  | -0.97206700 |
| C | 1.18662700  | -1.71663400 | 1.57618900  |
| C | 1.63287400  | -2.78480200 | 2.36545300  |
| H | 2.67312800  | -3.10832700 | 2.34642500  |
| C | 0.72386900  | -3.45831500 | 3.19073400  |
| H | 1.07806700  | -4.29137900 | 3.80366100  |
| C | -0.61899700 | -3.08211900 | 3.22851600  |
| H | -1.32763600 | -3.62469700 | 3.85962000  |
| C | -1.05512200 | -1.99441800 | 2.45907500  |
| H | -2.10652000 | -1.69671200 | 2.49250700  |
| C | -0.16533900 | -1.30336100 | 1.62948900  |
| C | -4.12923700 | -0.46508100 | -1.69645500 |
| C | -3.74880500 | -0.58087400 | -0.34013400 |
| C | -5.10392400 | -2.39956900 | 0.02452000  |
| C | -5.53580700 | -2.40611900 | -1.30009800 |
| C | -5.04492600 | -1.41801200 | -2.15629100 |
| H | -5.47168800 | -3.14395200 | 0.73972200  |
| H | -6.24358600 | -3.15986400 | -1.65204600 |
| H | -5.37518100 | -1.37978800 | -3.19821400 |
| N | -2.79199100 | 0.31361700  | 0.23463900  |
| N | -4.23368700 | -1.50067700 | 0.49230100  |
| C | -3.62062500 | 0.63740300  | -2.58122300 |
| H | -2.52287900 | 0.61264800  | -2.64988500 |
| H | -3.90847800 | 1.62902300  | -2.19380400 |
| H | -4.03141300 | 0.54344600  | -3.59733500 |
| C | -3.22320700 | 1.13124900  | 1.14816700  |
| H | -0.56002300 | 0.19781600  | 1.77006800  |
| C | -2.27064200 | 1.92306000  | 1.88542100  |
| C | -0.89608600 | 1.61293000  | 1.67340900  |
| C | -2.66185900 | 2.95350900  | 2.76272900  |
| C | 0.05482600  | 2.36565700  | 2.38809800  |
| C | -1.69664100 | 3.69477300  | 3.43543100  |
| H | -3.72506800 | 3.16847400  | 2.90416700  |
| C | -0.33780300 | 3.39702100  | 3.24265900  |
| H | 1.11871500  | 2.14587700  | 2.27119900  |

|          |             |             |             |
|----------|-------------|-------------|-------------|
| H        | -1.99181400 | 4.49997900  | 4.11243500  |
| H        | 0.42351900  | 3.97700200  | 3.77195800  |
| Br       | -0.59091300 | -1.41236500 | -1.90700700 |
| H        | -4.29612100 | 1.19846400  | 1.37725800  |
| <b>H</b> |             |             |             |
| Ru       | -0.81812000 | -0.49471500 | -0.24472400 |
| N        | 1.56308800  | 0.96516600  | -0.97555700 |
| N        | 2.04002700  | -0.56087700 | 0.72382700  |
| C        | 3.96116200  | 0.38542500  | -0.70038100 |
| C        | 5.15310600  | 1.19815500  | -0.14667500 |
| H        | 5.65845000  | 1.70269900  | -0.98838500 |
| H        | 5.90791100  | 0.57180400  | 0.35431600  |
| C        | 4.50996400  | 2.24066800  | 0.78002300  |
| H        | 4.30115000  | 1.79370400  | 1.76613300  |
| H        | 5.16733100  | 3.10496900  | 0.95963400  |
| C        | 3.18869400  | 2.62451400  | 0.07670200  |
| H        | 3.27166900  | 3.59223300  | -0.44089200 |
| H        | 2.35150500  | 2.71870000  | 0.78050900  |
| C        | 2.92520100  | 1.49221100  | -0.96152200 |
| H        | 3.12849400  | 1.87497500  | -1.96822800 |
| C        | 4.29804500  | -0.44033400 | -1.96001400 |
| H        | 5.01438300  | 0.08189700  | -2.61389800 |
| H        | 3.37891200  | -0.61241500 | -2.54613500 |
| C        | 4.80454000  | -1.77359600 | -1.41608700 |
| H        | 5.83698700  | -1.67042200 | -1.03966800 |
| H        | 4.81141400  | -2.57739300 | -2.16861400 |
| C        | 3.82796700  | -2.05947100 | -0.26950300 |
| H        | 2.90099700  | -2.49979200 | -0.66887000 |
| H        | 4.23575600  | -2.76806800 | 0.46448000  |
| C        | 3.48119500  | -0.66988400 | 0.35310100  |
| H        | 4.04392200  | -0.51095100 | 1.28296500  |
| C        | 1.11791800  | 0.03165300  | -0.09930600 |
| C        | 0.57312100  | 1.46810000  | -1.84917800 |
| C        | 0.80647200  | 2.43835200  | -2.83258200 |
| H        | 1.79055800  | 2.88859100  | -2.96858800 |
| C        | -0.24538700 | 2.84142000  | -3.66077500 |
| H        | -0.06172500 | 3.59614900  | -4.42980900 |
| C        | -1.52114600 | 2.28987100  | -3.50698200 |
| H        | -2.33844700 | 2.60634900  | -4.16060700 |
| C        | -1.75529700 | 1.34242100  | -2.50525000 |
| H        | -2.75829700 | 0.92807200  | -2.38467600 |
| C        | -0.71819700 | 0.91087700  | -1.66352100 |
| C        | 1.58728400  | -1.35086200 | 1.81742400  |



|    |             |             |             |
|----|-------------|-------------|-------------|
| C  | 2.47013500  | -2.15349600 | 2.56804700  |
| H  | 3.53113400  | -2.18668400 | 2.33797000  |
| C  | 2.00798800  | -2.94393200 | 3.62297900  |
| H  | 2.72727100  | -3.55642300 | 4.17298600  |
| C  | 0.65723000  | -2.96860400 | 3.97161100  |
| H  | 0.30121900  | -3.59831100 | 4.78990700  |
| C  | -0.22563100 | -2.15315900 | 3.26210700  |
| H  | -1.28484600 | -2.11691800 | 3.52827500  |
| C  | 0.23306500  | -1.34933600 | 2.21808600  |
| C  | -5.13633300 | -0.49923900 | 0.20607300  |
| C  | -3.73525000 | -0.27281800 | 0.17630600  |
| C  | -3.36910700 | -2.22462900 | -1.06338600 |
| C  | -4.72733000 | -2.51391000 | -1.08120900 |
| C  | -5.61304800 | -1.64003300 | -0.43799700 |
| H  | -2.62766500 | -2.87140200 | -1.53808400 |
| H  | -5.08498800 | -3.41110400 | -1.58977500 |
| H  | -6.68652300 | -1.84963200 | -0.43743100 |
| N  | -3.20354800 | 0.83441600  | 0.78706700  |
| N  | -2.88389100 | -1.12955000 | -0.45144600 |
| C  | -6.04405500 | 0.47120100  | 0.90876900  |
| H  | -5.97482600 | 1.47687700  | 0.46341800  |
| H  | -5.76379100 | 0.58650100  | 1.96789100  |
| H  | -7.09216900 | 0.14020000  | 0.85819800  |
| C  | -1.90305500 | 0.98026200  | 0.74529900  |
| H  | -0.49487000 | -0.62395800 | 1.81765000  |
| C  | -1.40936900 | 2.23537600  | 1.38852700  |
| C  | -0.16710800 | 2.32037900  | 2.04177300  |
| C  | -2.22796900 | 3.38527300  | 1.37552600  |
| C  | 0.23366200  | 3.49902100  | 2.67795400  |
| H  | 0.48647600  | 1.44932100  | 2.07888900  |
| C  | -1.81534300 | 4.57069100  | 1.98190400  |
| H  | -3.19516800 | 3.32738700  | 0.87450300  |
| C  | -0.58364700 | 4.63174900  | 2.64358600  |
| H  | 1.19257700  | 3.53193700  | 3.20211000  |
| H  | -2.46063700 | 5.45274000  | 1.94401600  |
| H  | -0.26324200 | 5.55740900  | 3.12924000  |
| Br | 0.04570800  | -2.66261600 | -1.38906800 |

**INT1**

|   |             |            |             |
|---|-------------|------------|-------------|
| C | -2.47739200 | 4.39883300 | 0.08112900  |
| C | -1.49399300 | 3.37657800 | -0.02680000 |
| C | -2.76207100 | 2.22289600 | -1.62360000 |
| C | -3.75360400 | 3.19545900 | -1.59852100 |
| C | -3.61007400 | 4.28281000 | -0.72073100 |

|   |             |             |             |
|---|-------------|-------------|-------------|
| H | -2.81381700 | 1.35240700  | -2.28374800 |
| H | -4.61711300 | 3.11505800  | -2.26248300 |
| H | -4.38407400 | 5.05393400  | -0.67492500 |
| N | -0.32433000 | 3.46598500  | 0.67688000  |
| N | -1.67004100 | 2.29760100  | -0.83899600 |
| C | -2.26419100 | 5.54886500  | 1.02314000  |
| H | -1.31891400 | 6.07029400  | 0.80517800  |
| H | -2.18722700 | 5.19795300  | 2.06521500  |
| H | -3.09036300 | 6.27249100  | 0.96096100  |
| C | 0.54706400  | 2.49528500  | 0.52099300  |
| C | 1.82223400  | 2.68705300  | 1.26814600  |
| C | 3.05700000  | 2.24518800  | 0.76119700  |
| C | 1.81189300  | 3.35828400  | 2.50892400  |
| C | 4.24316100  | 2.47438900  | 1.46388400  |
| H | 3.08949100  | 1.74971700  | -0.20795700 |
| C | 2.99183200  | 3.56015900  | 3.22411200  |
| H | 0.85804300  | 3.71094800  | 2.90400200  |
| C | 4.21472400  | 3.12185800  | 2.70288300  |
| H | 5.19639400  | 2.14764600  | 1.03953600  |
| H | 2.95991600  | 4.06777800  | 4.19209800  |
| H | 5.14160700  | 3.28857900  | 3.25837300  |
| C | 0.68098500  | -0.90735100 | 2.04701900  |
| C | 1.32396800  | -0.34017900 | 3.15797500  |
| C | 0.57714400  | 0.00150200  | 4.28680600  |
| C | -0.80706200 | -0.21556700 | 4.31232500  |
| C | -1.44976800 | -0.78313500 | 3.20989500  |
| C | -0.70066800 | -1.13546400 | 2.07813800  |
| H | 1.08014700  | 0.44795700  | 5.14872400  |
| H | -1.38292300 | 0.05139100  | 5.20281400  |
| H | -2.52748200 | -0.99620900 | 3.17536200  |
| H | -1.20961100 | -1.63022700 | 1.25085600  |
| N | 1.47504200  | -1.28268100 | 0.89483800  |
| C | 1.38312200  | -0.50410800 | -0.19432000 |
| N | 2.27216000  | -0.67088600 | -1.21204000 |
| C | 2.15360900  | 0.28383700  | -2.24221900 |
| C | 2.98080700  | 0.33061800  | -3.36960500 |
| C | 1.13800800  | 1.26018800  | -2.03869500 |
| C | 2.80617500  | 1.35836800  | -4.30427400 |
| H | 3.76069000  | -0.41507800 | -3.53121100 |
| C | 1.00279800  | 2.28983500  | -2.98274600 |
| C | 1.82492300  | 2.33611300  | -4.11460900 |
| H | 3.45298000  | 1.39503800  | -5.18466300 |
| H | 0.23882700  | 3.05718700  | -2.84075400 |
| H | 1.70267100  | 3.13955200  | -4.84564900 |

|    |             |             |             |
|----|-------------|-------------|-------------|
| C  | 3.34262000  | -1.66298200 | -1.18323200 |
| H  | 3.48505700  | -2.02356500 | -2.21343500 |
| C  | 2.38388000  | -2.45106100 | 1.05030000  |
| C  | 2.96893300  | -2.87977300 | -0.31941800 |
| C  | 4.34877900  | -3.55219100 | -0.14215600 |
| C  | 4.69096800  | -1.15476900 | -0.61822900 |
| H  | 4.49651300  | -0.39869600 | 0.15662300  |
| H  | 5.29841400  | -0.66528300 | -1.39358500 |
| C  | 5.37600300  | -2.40522200 | -0.00977400 |
| H  | 6.31548100  | -2.65533100 | -0.52501700 |
| H  | 5.64030300  | -2.22543500 | 1.04330600  |
| H  | 4.55769600  | -4.14438900 | -1.04802600 |
| H  | 4.37232400  | -4.25492100 | 0.70473300  |
| H  | 3.17163100  | -2.17682100 | 1.77064400  |
| C  | 1.60828000  | -3.69878900 | 1.50141000  |
| H  | 2.33934300  | -4.44176500 | 1.85858600  |
| H  | 0.91376900  | -3.50648700 | 2.33054400  |
| C  | 0.91687100  | -4.18928100 | 0.22026800  |
| H  | -0.03749300 | -3.65432600 | 0.10130300  |
| H  | 0.69117700  | -5.26601300 | 0.25879900  |
| C  | 1.88148700  | -3.81204900 | -0.93072900 |
| H  | 2.35763300  | -4.69993800 | -1.37502300 |
| H  | 1.34267300  | -3.30079100 | -1.74328700 |
| Ru | -0.07854400 | 0.85910300  | -0.52539300 |
| Br | -1.52983800 | -1.09714700 | -1.71801300 |
| H  | 2.39959200  | -0.15418400 | 3.13037400  |
| K  | -2.83749500 | -4.13568700 | -0.70698800 |
| C  | -4.03054100 | -2.50081200 | 1.29159200  |
| O  | -4.23412200 | -1.42535000 | 1.97346300  |
| O  | -4.66887300 | -2.64983600 | 0.14434400  |
| K  | -4.64873800 | -0.16260400 | -0.16549900 |
| O  | -3.18348700 | -3.39028600 | 1.65832800  |

**TS2**

|   |            |             |             |
|---|------------|-------------|-------------|
| C | 5.04910500 | 0.99639700  | -0.00417100 |
| C | 3.62416500 | 0.96730400  | 0.04280800  |
| C | 3.64168400 | -1.11594800 | 1.11384600  |
| C | 5.02768900 | -1.15317100 | 1.12170600  |
| C | 5.73294300 | -0.08685800 | 0.53492100  |
| H | 3.03392800 | -1.88859300 | 1.59441800  |
| H | 5.55226300 | -1.98462100 | 1.59741000  |
| H | 6.82656500 | -0.09472300 | 0.52443700  |
| N | 2.89519000 | 2.03557900  | -0.38402400 |
| N | 2.95021900 | -0.10197200 | 0.55466200  |

|   |             |             |             |
|---|-------------|-------------|-------------|
| C | 5.75034700  | 2.18571100  | -0.59551000 |
| H | 5.48061500  | 3.10895500  | -0.05801400 |
| H | 5.45177900  | 2.34716700  | -1.64388200 |
| H | 6.84316800  | 2.06288200  | -0.55866600 |
| C | 1.58637700  | 1.94729800  | -0.25144100 |
| C | 0.85272400  | 3.18468100  | -0.65138500 |
| C | -0.27736900 | 3.64423500  | 0.04656800  |
| C | 1.32346700  | 3.95397900  | -1.73531300 |
| C | -0.91199600 | 4.83431000  | -0.32021800 |
| H | -0.63512200 | 3.08267800  | 0.90794000  |
| C | 0.67235200  | 5.12615400  | -2.11984600 |
| H | 2.20847400  | 3.61158100  | -2.27322000 |
| C | -0.44763200 | 5.57464000  | -1.41118800 |
| H | -1.77284300 | 5.18775500  | 0.25411600  |
| H | 1.04467400  | 5.69809900  | -2.97441700 |
| H | -0.95236600 | 6.49908400  | -1.70509300 |
| C | -1.07998900 | 0.51039600  | -2.07341900 |
| C | -1.59360800 | 1.17146100  | -3.19987000 |
| C | -0.74812500 | 1.48204200  | -4.26475500 |
| C | 0.61082100  | 1.14301100  | -4.21695300 |
| C | 1.09753200  | 0.44962000  | -3.11380100 |
| C | 0.27345600  | 0.08831200  | -2.02171500 |
| H | -1.15324000 | 2.00754600  | -5.13380800 |
| H | 1.26966700  | 1.39125800  | -5.05316600 |
| H | 2.13679600  | 0.10963800  | -3.11400400 |
| H | 0.56003000  | -1.07719200 | -1.72571700 |
| N | -1.87021700 | 0.36227100  | -0.90142800 |
| C | -1.17536500 | 0.44937900  | 0.25476900  |
| N | -1.83644100 | 0.67776600  | 1.41498900  |
| C | -0.98304400 | 0.96569400  | 2.50722900  |
| C | -1.44135400 | 1.27775400  | 3.79108000  |
| C | 0.40033500  | 0.95546000  | 2.18702700  |
| C | -0.51072900 | 1.60585000  | 4.78512500  |
| H | -2.50606300 | 1.27363800  | 4.03146000  |
| C | 1.30078900  | 1.30558400  | 3.20195900  |
| C | 0.85466700  | 1.62425500  | 4.49286200  |
| H | -0.86295900 | 1.85558200  | 5.78956400  |
| H | 2.37349800  | 1.31763800  | 2.99577800  |
| H | 1.57750900  | 1.89059500  | 5.26917700  |
| C | -3.28533200 | 0.82933800  | 1.48731600  |
| H | -3.61592600 | 0.41760400  | 2.45405900  |
| C | -3.34387900 | 0.25309000  | -1.01296900 |
| C | -3.99983400 | 0.04263800  | 0.37754500  |
| C | -5.41952400 | 0.66009700  | 0.40712400  |

|    |             |             |             |
|----|-------------|-------------|-------------|
| C  | -3.79559400 | 2.27987000  | 1.33766900  |
| H  | -3.17244000 | 2.79845100  | 0.59363800  |
| H  | -3.71230100 | 2.84781300  | 2.27556500  |
| C  | -5.25069500 | 2.14214800  | 0.83282100  |
| H  | -5.97821000 | 2.40344800  | 1.61633900  |
| H  | -5.43977100 | 2.83035400  | -0.00461400 |
| H  | -6.02182100 | 0.11710700  | 1.15352600  |
| H  | -5.94207100 | 0.55366000  | -0.55533200 |
| H  | -3.71368000 | 1.18307200  | -1.47040400 |
| C  | -3.74278200 | -1.00140500 | -1.84777800 |
| H  | -4.40350000 | -0.73248400 | -2.68533800 |
| H  | -2.83744900 | -1.46918600 | -2.26187200 |
| C  | -4.42892000 | -1.97797200 | -0.86305400 |
| H  | -4.15092100 | -3.02407000 | -1.06982100 |
| H  | -5.52624100 | -1.92737800 | -0.95277500 |
| C  | -4.00412900 | -1.48944600 | 0.52872800  |
| H  | -4.66959900 | -1.82573300 | 1.34045000  |
| H  | -2.98216800 | -1.82611700 | 0.77629500  |
| Ru | 0.81246400  | 0.17999200  | 0.34580600  |
| Br | 0.32899600  | -2.32977500 | 1.52544600  |
| H  | -2.63858800 | 1.47930000  | -3.24371200 |
| K  | -1.70567900 | -4.46644400 | 0.00441400  |
| C  | 0.02233100  | -3.33599000 | -1.88236900 |
| O  | 0.98455400  | -2.44516100 | -2.00400800 |
| O  | 0.36405600  | -4.53869900 | -1.53724400 |
| K  | 2.57801000  | -3.76612900 | -0.54756300 |
| O  | -1.19433700 | -3.00844700 | -2.02849900 |

## INT2

|   |             |             |             |
|---|-------------|-------------|-------------|
| C | -4.17093000 | -3.47428500 | -0.00296600 |
| C | -3.30839100 | -2.34040900 | -0.00366800 |
| C | -1.61677100 | -3.55245800 | -1.09222900 |
| C | -2.40063800 | -4.69371300 | -1.13114200 |
| C | -3.69142500 | -4.64707400 | -0.57512700 |
| H | -0.60615800 | -3.52768200 | -1.50648100 |
| H | -2.01441400 | -5.60615700 | -1.58966800 |
| H | -4.32728100 | -5.53707900 | -0.59368500 |
| N | -3.70787700 | -1.15607100 | 0.53745300  |
| N | -2.05287700 | -2.40109400 | -0.53850600 |
| C | -5.54113400 | -3.36745300 | 0.60471800  |
| H | -6.13225000 | -2.57423400 | 0.11975800  |
| H | -5.48440100 | -3.09278200 | 1.67076500  |
| H | -6.08999700 | -4.31756200 | 0.51748900  |
| C | -2.84108000 | -0.16207700 | 0.45732800  |

|   |             |             |             |
|---|-------------|-------------|-------------|
| C | -3.31602200 | 1.09951200  | 1.10325800  |
| C | -3.16572900 | 2.35963600  | 0.50035000  |
| C | -3.97259000 | 1.03177100  | 2.34886900  |
| C | -3.66177900 | 3.51243200  | 1.11689100  |
| H | -2.68918200 | 2.42812000  | -0.47692500 |
| C | -4.44005000 | 2.18605900  | 2.97869200  |
| H | -4.10892200 | 0.05497000  | 2.81645800  |
| C | -4.29097700 | 3.43344900  | 2.36282600  |
| H | -3.55869900 | 4.47942700  | 0.61658000  |
| H | -4.93304600 | 2.11121800  | 3.95224900  |
| H | -4.66866900 | 4.33743000  | 2.84866700  |
| C | 0.52507000  | 0.56436000  | 1.96934400  |
| C | 1.10913400  | 0.70452900  | 3.23744400  |
| C | 0.81621600  | -0.23471800 | 4.23909400  |
| C | -0.06906700 | -1.28474000 | 3.98003800  |
| C | -0.66690000 | -1.39258500 | 2.70974900  |
| C | -0.37108500 | -0.49646800 | 1.66919900  |
| H | 1.27083000  | -0.12467800 | 5.22717100  |
| H | -0.31314600 | -2.00508900 | 4.76651900  |
| H | -1.37909000 | -2.20522800 | 2.53535000  |
| H | 5.37356100  | -0.40616800 | 2.04931600  |
| N | 0.75637500  | 1.46387700  | 0.89684200  |
| C | -0.03664000 | 1.21810300  | -0.18512500 |
| N | -0.05475600 | 2.10611100  | -1.20208300 |
| C | -0.90787100 | 1.73992600  | -2.27908000 |
| C | -1.08319600 | 2.52165200  | -3.42635700 |
| C | -1.58681800 | 0.51239300  | -2.08592900 |
| C | -1.95365900 | 2.07212700  | -4.42839900 |
| H | -0.56182800 | 3.47191300  | -3.55805900 |
| C | -2.45980500 | 0.10468900  | -3.10496000 |
| C | -2.63736000 | 0.86535700  | -4.27181000 |
| H | -2.09740100 | 2.67701000  | -5.32789900 |
| H | -3.01417300 | -0.83254400 | -3.00184600 |
| H | -3.31922900 | 0.51639400  | -5.05306900 |
| C | 0.63891200  | 3.38589200  | -1.13862700 |
| H | 0.89883200  | 3.67619000  | -2.16710100 |
| C | 1.79040600  | 2.51822300  | 0.99157600  |
| C | 1.95293400  | 3.28531900  | -0.35311000 |
| C | 2.28633700  | 4.77413700  | -0.09605100 |
| C | -0.15092500 | 4.52822400  | -0.46204000 |
| H | -0.73690100 | 4.11339700  | 0.37120600  |
| H | -0.86739900 | 4.99719400  | -1.15262200 |
| C | 0.92842600  | 5.50807000  | 0.05866200  |
| H | 0.93219100  | 6.45193600  | -0.50743800 |

|    |             |             |             |
|----|-------------|-------------|-------------|
| H  | 0.73245500  | 5.77948500  | 1.10702200  |
| H  | 2.83134000  | 5.16469300  | -0.97089500 |
| H  | 2.94593200  | 4.91579600  | 0.77366300  |
| H  | 1.48344800  | 3.20440400  | 1.79751900  |
| C  | 3.21449600  | 1.93252400  | 1.27446000  |
| H  | 3.64234600  | 2.35184200  | 2.19766800  |
| H  | 3.14620700  | 0.84809800  | 1.42760500  |
| C  | 4.09093900  | 2.23894100  | 0.03976400  |
| H  | 4.77640200  | 1.40885500  | -0.19011300 |
| H  | 4.71107400  | 3.13263400  | 0.21743600  |
| C  | 3.07724800  | 2.51866200  | -1.07169800 |
| H  | 3.49327100  | 3.08881500  | -1.91772100 |
| H  | 2.67733800  | 1.57148000  | -1.47291500 |
| Ru | -1.04107500 | -0.52404100 | -0.33673300 |
| Br | 1.36788500  | -1.57553900 | -1.33887400 |
| H  | 1.77788600  | 1.53346300  | 3.46991900  |
| K  | 4.39762700  | -2.23773900 | -2.04101300 |
| C  | 5.08570900  | -1.76866500 | 0.73548900  |
| O  | 4.87437400  | -1.23689100 | 2.00593400  |
| O  | 4.47118500  | -2.84373500 | 0.53294600  |
| K  | 2.20214500  | -2.26821500 | 1.77382800  |
| O  | 5.79303800  | -1.11544800 | -0.05326700 |

### III

|   |             |             |             |
|---|-------------|-------------|-------------|
| C | -5.14249400 | 0.00411000  | -0.27195900 |
| C | -3.72234000 | 0.01600100  | -0.18249600 |
| C | -3.51420300 | 0.18955900  | -2.51925500 |
| C | -4.88798700 | 0.17716000  | -2.68531700 |
| C | -5.70380400 | 0.08474600  | -1.54175000 |
| H | -2.83140000 | 0.26350800  | -3.37110800 |
| H | -5.32043900 | 0.24066100  | -3.68531500 |
| H | -6.79211400 | 0.07716500  | -1.65009500 |
| N | -3.08022600 | -0.06707700 | 1.01469400  |
| N | -2.94223200 | 0.11302100  | -1.29942100 |
| C | -5.96503500 | -0.09038800 | 0.98144000  |
| H | -5.74173500 | 0.74522800  | 1.66446000  |
| H | -5.73192200 | -1.01000200 | 1.54254300  |
| H | -7.04167900 | -0.08092400 | 0.75489200  |
| C | -1.76339300 | -0.01795300 | 0.96875300  |
| C | -1.07656400 | -0.15751900 | 2.28618900  |
| C | -0.09350800 | 0.74366100  | 2.72646000  |
| C | -1.45873600 | -1.20745600 | 3.14391600  |
| C | 0.48690900  | 0.60257600  | 3.99054800  |
| H | 0.19022600  | 1.57905800  | 2.08622900  |

|   |             |             |             |
|---|-------------|-------------|-------------|
| C | -0.85705900 | -1.36402500 | 4.39345200  |
| H | -2.23357800 | -1.90199800 | 2.81426000  |
| C | 0.11665000  | -0.45677400 | 4.82442200  |
| H | 1.23150000  | 1.32912900  | 4.32735400  |
| H | -1.15640200 | -2.19452400 | 5.03892800  |
| H | 0.58016600  | -0.57152500 | 5.80811500  |
| C | 0.97073200  | -2.22422000 | -0.43386000 |
| C | 1.45730000  | -3.52434500 | -0.26357700 |
| C | 0.55321400  | -4.59621100 | -0.26277600 |
| C | -0.81236300 | -4.36190700 | -0.42057600 |
| C | -1.28344700 | -3.04572200 | -0.55851200 |
| C | -0.40963000 | -1.94900200 | -0.57932000 |
| H | 0.92838200  | -5.61492200 | -0.13292900 |
| H | -1.51708300 | -5.19858700 | -0.42342700 |
| H | -2.36119400 | -2.88364300 | -0.65296700 |
| N | 1.81066000  | -1.06830500 | -0.43717400 |
| C | 1.11993000  | 0.09370800  | -0.41242600 |
| N | 1.78591900  | 1.26188000  | -0.28644100 |
| C | 0.95484300  | 2.41775100  | -0.33080300 |
| C | 1.43996100  | 3.72184400  | -0.19143400 |
| C | -0.42263700 | 2.13771300  | -0.51354400 |
| C | 0.53719200  | 4.79362600  | -0.24932500 |
| H | 2.50096900  | 3.92566000  | -0.03514400 |
| C | -1.29445900 | 3.23629300  | -0.54854800 |
| C | -0.82476100 | 4.55529900  | -0.43250700 |
| H | 0.91018600  | 5.81574900  | -0.14223100 |
| H | -2.36908100 | 3.07198000  | -0.67134800 |
| H | -1.52819700 | 5.39196700  | -0.47301900 |
| C | 3.21412400  | 1.31893100  | 0.00405900  |
| H | 3.59829100  | 2.26018000  | -0.41339400 |
| C | 3.27957200  | -1.20183800 | -0.55406400 |
| C | 3.98321700  | 0.18216400  | -0.68695300 |
| C | 5.31680800  | 0.19265500  | 0.09298400  |
| C | 3.58076700  | 1.23196900  | 1.50820300  |
| H | 2.80382500  | 0.66948700  | 2.04510100  |
| H | 3.62060200  | 2.23193200  | 1.96510100  |
| C | 4.94074600  | 0.48996500  | 1.56099100  |
| H | 5.72353800  | 1.07952300  | 2.06144900  |
| H | 4.84246000  | -0.44353200 | 2.13600500  |
| H | 5.94726700  | 1.00305300  | -0.30989400 |
| H | 5.88848500  | -0.74131600 | -0.01988900 |
| H | 3.62890500  | -1.72719500 | 0.34884300  |
| C | 3.69030500  | -1.98352700 | -1.84791900 |
| H | 4.22052600  | -2.91632100 | -1.60730100 |



|    |             |             |             |
|----|-------------|-------------|-------------|
| H  | 2.78432300  | -2.27237200 | -2.39863400 |
| C  | 4.55511000  | -1.02816100 | -2.69596600 |
| H  | 4.39576100  | -1.16960100 | -3.77599700 |
| H  | 5.62683200  | -1.20145200 | -2.50631200 |
| C  | 4.15709400  | 0.36425100  | -2.20549900 |
| H  | 4.89281600  | 1.14764700  | -2.44774900 |
| H  | 3.19649700  | 0.66942400  | -2.65628900 |
| Ru | -0.88996000 | 0.10010500  | -0.78626200 |
| H  | 2.52033700  | -3.72428100 | -0.12452000 |

#### IV

|   |             |             |             |
|---|-------------|-------------|-------------|
| C | -1.41621100 | 0.08806500  | 2.32925200  |
| C | -0.43330100 | 1.01557400  | 1.91338200  |
| C | 0.13425900  | 1.82695400  | 2.90825100  |
| C | -0.21832000 | 1.69139300  | 4.26035600  |
| C | -1.15511800 | 0.73120700  | 4.64443500  |
| C | -1.76155700 | -0.08038200 | 3.67614700  |
| H | 0.88824100  | 2.57114900  | 2.64095900  |
| H | 0.24889800  | 2.33469500  | 5.01184600  |
| H | -1.42813500 | 0.61110000  | 5.69639500  |
| H | -2.49350200 | -0.82628000 | 3.98746200  |
| N | -1.99134700 | -0.67048700 | 1.27340900  |
| C | -1.36546200 | -0.49777100 | 0.08263800  |
| N | -1.77826300 | -1.22198400 | -0.98390100 |
| C | -1.16118400 | -0.85862000 | -2.20815800 |
| C | -1.42743100 | -1.49250900 | -3.42754000 |
| C | -0.26070600 | 0.22775600  | -2.10150800 |
| C | -0.81703000 | -1.01285300 | -4.59431600 |
| H | -2.09899300 | -2.35044700 | -3.49051600 |
| C | 0.29822000  | 0.70364100  | -3.29669300 |
| C | 0.03665800  | 0.08924500  | -4.53317100 |
| H | -1.02260600 | -1.50230400 | -5.55015400 |
| H | 0.95820600  | 1.57570700  | -3.28167300 |
| H | 0.50039100  | 0.47731300  | -5.44478100 |
| C | -2.73540000 | -2.32061600 | -0.88024500 |
| H | -3.27050600 | -2.36969500 | -1.83835400 |
| C | -3.22244800 | -1.45892300 | 1.50984300  |
| C | -3.80101400 | -2.07012800 | 0.19965900  |
| C | -4.32885800 | -3.49932300 | 0.45873700  |
| C | -2.10876200 | -3.70891100 | -0.56871800 |
| H | -1.11740800 | -3.58309100 | -0.11559900 |
| H | -1.95795300 | -4.28369900 | -1.49381300 |
| C | -3.08830400 | -4.40749500 | 0.40507700  |
| H | -3.34409700 | -5.43102000 | 0.09150700  |

|    |             |             |             |
|----|-------------|-------------|-------------|
| H  | -2.63210700 | -4.49485000 | 1.40399400  |
| H  | -5.02856000 | -3.76333500 | -0.35254000 |
| H  | -4.88681500 | -3.58913000 | 1.40379600  |
| H  | -2.95528600 | -2.26023100 | 2.21755000  |
| C  | -4.38435900 | -0.58002000 | 2.08540100  |
| H  | -4.65390300 | -0.87881500 | 3.10879000  |
| H  | -4.05231900 | 0.46553700  | 2.13560100  |
| C  | -5.56974200 | -0.70940800 | 1.10957600  |
| H  | -6.15911100 | 0.21776200  | 1.04879900  |
| H  | -6.25684400 | -1.50965400 | 1.43113300  |
| C  | -4.90597700 | -1.08328700 | -0.21463600 |
| H  | -5.59782600 | -1.52299900 | -0.95109700 |
| H  | -4.45672200 | -0.18996900 | -0.67760200 |
| Ru | 0.13311700  | 0.87265900  | -0.11068900 |
| C  | 1.49978700  | 4.98526400  | -0.34588400 |
| C  | 2.83224800  | 5.01542500  | 0.04836400  |
| C  | 3.48226700  | 3.83109100  | 0.43244200  |
| C  | 2.78122800  | 2.63869700  | 0.37498000  |
| C  | 0.83919500  | 3.72386800  | -0.35073300 |
| H  | 3.36835800  | 5.96848700  | 0.07262000  |
| H  | 4.52103100  | 3.83455300  | 0.76731800  |
| H  | 3.25816900  | 1.70402600  | 0.66794300  |
| C  | 0.74031100  | 6.22366800  | -0.73092000 |
| H  | 1.39458200  | 7.10867700  | -0.72457800 |
| H  | 0.29115300  | 6.12328000  | -1.73168200 |
| H  | -0.09937300 | 6.40394000  | -0.04010400 |
| N  | 1.49453300  | 2.56609100  | -0.03373800 |
| N  | -0.49274700 | 3.65253800  | -0.63902600 |
| C  | -1.03568100 | 2.45886100  | -0.53811900 |
| C  | -2.51723400 | 2.46287800  | -0.76074000 |
| C  | -3.07859300 | 2.16298400  | -2.01357500 |
| C  | -3.37218700 | 2.86136500  | 0.28264800  |
| C  | -4.45762900 | 2.27211700  | -2.21922700 |
| H  | -2.42722700 | 1.86505900  | -2.83672400 |
| C  | -4.75113400 | 2.96326700  | 0.07578700  |
| H  | -2.94469100 | 3.10977000  | 1.25709300  |
| C  | -5.30024100 | 2.67243500  | -1.17763500 |
| H  | -4.87423400 | 2.04917900  | -3.20564900 |
| H  | -5.39866300 | 3.28522700  | 0.89647800  |
| H  | -6.37744700 | 2.76171600  | -1.34252600 |
| P  | 2.03961400  | -0.91760000 | 0.11465700  |
| C  | 3.45512700  | -0.73530800 | -1.08237000 |
| C  | 4.45343400  | -1.72522500 | -1.17691100 |
| C  | 3.53570600  | 0.37903600  | -1.92973200 |

|   |            |             |             |
|---|------------|-------------|-------------|
| C | 5.50751300 | -1.59130300 | -2.08163600 |
| H | 4.40777700 | -2.61209900 | -0.54114700 |
| C | 4.59128800 | 0.51174600  | -2.83981500 |
| H | 2.76473300 | 1.14689700  | -1.88955600 |
| C | 5.57981600 | -0.47012100 | -2.91651900 |
| H | 6.27401000 | -2.36887900 | -2.13818900 |
| H | 4.63217600 | 1.38683700  | -3.49351500 |
| H | 6.40273200 | -0.36840500 | -3.62907500 |
| C | 2.88249400 | -0.90904100 | 1.77173600  |
| C | 2.09091400 | -1.09090000 | 2.92179800  |
| C | 4.25765600 | -0.66771900 | 1.93966400  |
| C | 2.66356600 | -1.06850900 | 4.19577200  |
| H | 1.01399400 | -1.24008700 | 2.82925500  |
| C | 4.82556600 | -0.62907600 | 3.21755500  |
| H | 4.89983000 | -0.50670900 | 1.07310700  |
| C | 4.03349100 | -0.83684300 | 4.34880900  |
| H | 2.02775700 | -1.21562600 | 5.07218900  |
| H | 5.89660400 | -0.43684900 | 3.32414600  |
| H | 4.47940500 | -0.80902400 | 5.34647800  |
| C | 1.68150700 | -2.72465200 | -0.17188400 |
| C | 1.43270600 | -3.13467000 | -1.49579900 |
| C | 1.68392000 | -3.69472600 | 0.84285100  |
| C | 1.21908700 | -4.48118700 | -1.79612200 |
| H | 1.42420100 | -2.40133500 | -2.30465400 |
| C | 1.45850400 | -5.04296300 | 0.53924100  |
| H | 1.88480800 | -3.41332500 | 1.87743900  |
| C | 1.23334000 | -5.44223300 | -0.77990400 |
| H | 1.04050400 | -4.77836900 | -2.83289700 |
| H | 1.47450000 | -5.78461400 | 1.34253700  |
| H | 1.07014600 | -6.49706000 | -1.01614200 |

**INT5**

|   |             |             |             |
|---|-------------|-------------|-------------|
| C | -0.01756800 | 0.18682600  | -0.00000500 |
| C | -0.33305000 | 1.46982800  | -0.00003300 |
| H | -1.24231100 | 2.07452000  | -0.00002300 |
| C | 1.41633000  | -0.29222800 | 0.00002500  |
| H | 1.61719800  | -0.92018300 | -0.88612700 |
| H | 2.12837200  | 0.54553900  | 0.00009700  |
| H | 1.61712800  | -0.92027900 | 0.88612400  |
| C | -1.07961200 | -0.89818200 | -0.00000200 |
| H | -0.96884600 | -1.54602200 | -0.88749000 |
| H | -0.96909900 | -1.54575600 | 0.88771400  |
| H | -2.09904500 | -0.48528600 | -0.00020600 |

## V

|   |             |             |             |
|---|-------------|-------------|-------------|
| C | -1.08438700 | -0.82920600 | -2.28354200 |
| C | 0.29358900  | -0.93222900 | -1.95758800 |
| C | 1.13584800  | -1.54286400 | -2.89516600 |
| C | 0.64581400  | -2.01574700 | -4.12274300 |
| C | -0.70714000 | -1.86868400 | -4.43061400 |
| C | -1.58253200 | -1.26971200 | -3.51517400 |
| H | 2.20088300  | -1.65226400 | -2.67504000 |
| H | 1.32291000  | -2.49441500 | -4.83566500 |
| H | -1.09529500 | -2.22204400 | -5.38977100 |
| H | -2.63394300 | -1.15074000 | -3.77940700 |
| N | -1.89803100 | -0.22971700 | -1.27910000 |
| C | -1.17292700 | 0.30798300  | -0.26999700 |
| N | -1.79049200 | 0.87980500  | 0.78099100  |
| C | -0.91612900 | 1.17783300  | 1.85752600  |
| C | -1.34242000 | 1.63317000  | 3.11047500  |
| C | 0.44538500  | 0.91846800  | 1.58591200  |
| C | -0.40225200 | 1.79120000  | 4.13573000  |
| H | -2.39339800 | 1.85198800  | 3.30834100  |
| C | 1.35499300  | 1.05260300  | 2.63744300  |
| C | 0.94066900  | 1.48750800  | 3.90643400  |
| H | -0.73066400 | 2.14195200  | 5.11761700  |
| H | 2.41320200  | 0.83464500  | 2.47020900  |
| H | 1.67468900  | 1.60037200  | 4.70934800  |
| C | -3.20326000 | 1.24018600  | 0.77036200  |
| H | -3.56043200 | 1.18250300  | 1.80648900  |
| C | -3.37172500 | -0.32464500 | -1.32675500 |
| C | -4.06290600 | 0.24595200  | -0.04134200 |
| C | -5.26918300 | 1.12762000  | -0.44107600 |
| C | -3.49187500 | 2.66665600  | 0.20805800  |
| H | -2.59282800 | 3.08693700  | -0.26593600 |
| H | -3.76182300 | 3.34665800  | 1.03017200  |
| C | -4.65676100 | 2.49196000  | -0.79061100 |
| H | -5.39396900 | 3.30757900  | -0.73800900 |
| H | -4.27445500 | 2.48068600  | -1.82449100 |
| H | -5.94006500 | 1.22571700  | 0.42995700  |
| H | -5.86607600 | 0.69735800  | -1.26040200 |
| H | -3.69487700 | 0.25200900  | -2.20811500 |
| C | -3.87220600 | -1.80302000 | -1.43557100 |
| H | -4.28888000 | -2.02593500 | -2.42793800 |
| H | -3.01941300 | -2.48264400 | -1.29442800 |
| C | -4.90238000 | -2.00521300 | -0.31082400 |
| H | -4.93336000 | -3.04648000 | 0.04552000  |
| H | -5.91763900 | -1.75701400 | -0.66212600 |

|            |             |             |             |
|------------|-------------|-------------|-------------|
| C          | -4.45820300 | -1.01016800 | 0.75884700  |
| H          | -5.23105300 | -0.79128800 | 1.51281500  |
| H          | -3.57629300 | -1.39933000 | 1.29649200  |
| Ru         | 0.83365500  | 0.38144600  | -0.41376700 |
| C          | 4.97315400  | -0.91133700 | -0.20877000 |
| C          | 5.72113900  | -0.02225100 | -0.97363000 |
| C          | 5.09664800  | 1.05827000  | -1.61694800 |
| C          | 3.72878600  | 1.22419300  | -1.46754400 |
| C          | 3.57276000  | -0.67765600 | -0.11542300 |
| H          | 6.80016600  | -0.17022300 | -1.07360700 |
| H          | 5.66838100  | 1.76494700  | -2.22138000 |
| H          | 3.20223300  | 2.06030700  | -1.93119100 |
| C          | 5.58226000  | -2.08972100 | 0.49739500  |
| H          | 6.66812900  | -2.13790200 | 0.32578300  |
| H          | 5.40126500  | -2.04138300 | 1.58334300  |
| H          | 5.13047400  | -3.03501500 | 0.15612900  |
| N          | 2.97873800  | 0.37863900  | -0.73410400 |
| N          | 2.77361200  | -1.52686800 | 0.59661700  |
| C          | 1.48552700  | -1.29760500 | 0.57077700  |
| C          | 0.66643500  | -2.24145300 | 1.38920800  |
| C          | 1.16676900  | -2.69947400 | 2.62475500  |
| C          | -0.57432900 | -2.73330200 | 0.95287500  |
| C          | 0.44068400  | -3.59976500 | 3.40404200  |
| H          | 2.13686500  | -2.33335200 | 2.96435700  |
| C          | -1.29016400 | -3.65683200 | 1.72082900  |
| H          | -0.96069500 | -2.41368100 | -0.01386400 |
| C          | -0.79163700 | -4.08603300 | 2.95382900  |
| H          | 0.84056800  | -3.92934800 | 4.36707500  |
| H          | -2.24148300 | -4.04906500 | 1.35093800  |
| H          | -1.35738100 | -4.79952100 | 3.55918900  |
| C          | 1.20178500  | 3.66610500  | -0.31631100 |
| C          | 0.93700400  | 2.37717200  | -0.56345500 |
| H          | 0.53148500  | 2.12140000  | -1.59545600 |
| C          | 1.77595400  | 4.17569400  | 0.98358000  |
| H          | 1.08737100  | 4.89416400  | 1.46482300  |
| H          | 1.97702500  | 3.36877700  | 1.69749100  |
| H          | 2.71894600  | 4.72397300  | 0.80237100  |
| C          | 0.96263600  | 4.73831600  | -1.36093900 |
| H          | 0.26838200  | 5.51158700  | -0.98285600 |
| H          | 1.90134200  | 5.26481800  | -1.61509300 |
| H          | 0.53959900  | 4.33279900  | -2.29311200 |
| <b>TS3</b> |             |             |             |
| C          | 1.10558400  | -1.82413700 | -1.29158600 |

|   |             |             |             |
|---|-------------|-------------|-------------|
| C | -0.24647500 | -1.41833900 | -1.43211900 |
| C | -1.11075500 | -2.30249900 | -2.09012600 |
| C | -0.67258200 | -3.54567800 | -2.57346400 |
| C | 0.65157100  | -3.93500800 | -2.37744500 |
| C | 1.55059500  | -3.07389000 | -1.73308800 |
| H | -2.16401600 | -2.03484400 | -2.21226700 |
| H | -1.37311100 | -4.21499700 | -3.08111500 |
| H | 0.99899000  | -4.91194600 | -2.72436400 |
| H | 2.58263100  | -3.39484300 | -1.58863500 |
| N | 1.98073200  | -0.86741100 | -0.67411800 |
| C | 1.34112400  | 0.23926800  | -0.23743300 |
| N | 2.05452700  | 1.27658400  | 0.26459900  |
| C | 1.35296400  | 2.52440400  | 0.27347400  |
| C | 1.93452800  | 3.71845900  | 0.70908700  |
| C | 0.02579300  | 2.47600800  | -0.23911700 |
| C | 1.21065800  | 4.91639700  | 0.59644300  |
| H | 2.93933900  | 3.74834600  | 1.13438100  |
| C | -0.65756000 | 3.69409900  | -0.33278600 |
| C | -0.07555600 | 4.91239100  | 0.06238800  |
| H | 1.66828600  | 5.85108800  | 0.93216700  |
| H | -1.68345300 | 3.70906000  | -0.71456100 |
| H | -0.63509800 | 5.84741300  | -0.03372400 |
| C | 3.43060800  | 1.11411900  | 0.71868100  |
| H | 3.90635200  | 2.10082100  | 0.68014700  |
| C | 3.44608700  | -0.99975800 | -0.82649500 |
| C | 4.25529500  | 0.20078600  | -0.21767200 |
| C | 5.35307600  | -0.32099300 | 0.73683400  |
| C | 3.57541500  | 0.53776000  | 2.16220000  |
| H | 2.60790600  | 0.17904900  | 2.54223800  |
| H | 3.90860400  | 1.32978200  | 2.85033700  |
| C | 4.61881700  | -0.59555500 | 2.05682900  |
| H | 5.30188500  | -0.63369600 | 2.91895900  |
| H | 4.11451700  | -1.57487300 | 2.01073700  |
| H | 6.10454700  | 0.47427000  | 0.88224600  |
| H | 5.88602400  | -1.20100300 | 0.34383500  |
| H | 3.73243400  | -1.92966200 | -0.31073800 |
| C | 3.87898800  | -1.06624200 | -2.32741600 |
| H | 4.07436700  | -2.09255700 | -2.66614100 |
| H | 3.05771100  | -0.67738700 | -2.94901700 |
| C | 5.10499600  | -0.15407600 | -2.45898100 |
| H | 5.24370100  | 0.21689900  | -3.48640600 |
| H | 6.02675900  | -0.69363300 | -2.18255700 |
| C | 4.81165800  | 0.94944200  | -1.44657400 |
| H | 5.68499400  | 1.57009100  | -1.19002700 |

|           |             |             |             |
|-----------|-------------|-------------|-------------|
| H         | 4.03601800  | 1.62449300  | -1.84972000 |
| Ru        | -0.61891600 | 0.47875100  | -0.57723500 |
| C         | -4.89996500 | 0.00370800  | -0.87447800 |
| C         | -5.30644600 | 0.80707800  | -1.92928400 |
| C         | -4.37766600 | 1.60184800  | -2.63182100 |
| C         | -3.05306500 | 1.56897700  | -2.23238000 |
| C         | -3.50843200 | 0.00648100  | -0.52997000 |
| H         | -6.36150900 | 0.82048000  | -2.21824300 |
| H         | -4.68624300 | 2.23589400  | -3.46468100 |
| H         | -2.29059600 | 2.17496900  | -2.73119500 |
| C         | -5.85025200 | -0.86719000 | -0.10521400 |
| H         | -6.87820900 | -0.77271800 | -0.48698300 |
| H         | -5.55257500 | -1.92734700 | -0.16261400 |
| H         | -5.85232700 | -0.61083100 | 0.96788500  |
| N         | -2.62707900 | 0.80052400  | -1.20879200 |
| N         | -3.02670100 | -0.77292500 | 0.45108900  |
| C         | -1.70619500 | -0.75816200 | 0.71933400  |
| C         | -1.24729700 | -1.93946000 | 1.54989700  |
| C         | 0.09727400  | -2.18741000 | 1.88086600  |
| C         | -2.20764300 | -2.85930700 | 2.01654100  |
| C         | 0.46723900  | -3.29668800 | 2.64356500  |
| H         | 0.87437500  | -1.51061000 | 1.53228100  |
| C         | -1.84053800 | -3.96752600 | 2.78200400  |
| H         | -3.25225500 | -2.68425400 | 1.76263700  |
| C         | -0.49972500 | -4.19566100 | 3.10226500  |
| H         | 1.52290900  | -3.46079800 | 2.87771800  |
| H         | -2.61225100 | -4.66092900 | 3.12846100  |
| H         | -0.21062100 | -5.06503500 | 3.69889000  |
| C         | -1.78019900 | 1.48456200  | 2.24684500  |
| C         | -0.95885200 | 0.67503300  | 1.49867600  |
| H         | -0.06335400 | 0.36718700  | 2.03996800  |
| C         | -3.11360300 | 1.99397900  | 1.81615600  |
| H         | -3.46676800 | 2.81093600  | 2.46317200  |
| H         | -3.12622100 | 2.33066700  | 0.77173600  |
| H         | -3.84485600 | 1.16441000  | 1.89001200  |
| C         | -1.39090300 | 1.81758800  | 3.66181200  |
| H         | -1.24520200 | 2.90797000  | 3.77179700  |
| H         | -2.19763100 | 1.54198100  | 4.36604800  |
| H         | -0.46547600 | 1.31483700  | 3.97753700  |
| <b>VI</b> |             |             |             |
| C         | 1.02924000  | -1.87846900 | -1.20307900 |
| C         | -0.20076800 | -1.31190200 | -1.62650100 |
| C         | -1.02723700 | -2.09168700 | -2.44946600 |

|    |             |             |             |
|----|-------------|-------------|-------------|
| C  | -0.68576600 | -3.41327100 | -2.76767000 |
| C  | 0.48442500  | -3.98162100 | -2.25379200 |
| C  | 1.35058400  | -3.21444300 | -1.46648000 |
| H  | -1.96659600 | -1.67965300 | -2.82698200 |
| H  | -1.34936600 | -4.00773400 | -3.40246000 |
| H  | 0.73421400  | -5.02311500 | -2.47328500 |
| H  | 2.26742300  | -3.65933300 | -1.07663000 |
| N  | 1.88294100  | -0.95897400 | -0.53435100 |
| C  | 1.23988800  | 0.21026500  | -0.30837900 |
| N  | 1.97139300  | 1.33727500  | -0.06324200 |
| C  | 1.30005100  | 2.48857400  | -0.53090300 |
| C  | 1.76770700  | 3.79992700  | -0.38954300 |
| C  | 0.08249400  | 2.19362400  | -1.21309000 |
| C  | 1.05279600  | 4.84273800  | -0.99500100 |
| H  | 2.67522100  | 4.02312000  | 0.17552700  |
| C  | -0.60176700 | 3.26589600  | -1.80158700 |
| C  | -0.11883600 | 4.58155200  | -1.70945100 |
| H  | 1.42134300  | 5.86816400  | -0.90236100 |
| H  | -1.53579200 | 3.08259600  | -2.34042100 |
| H  | -0.66525500 | 5.40084000  | -2.18498600 |
| C  | 3.33027600  | 1.31257300  | 0.45514300  |
| H  | 3.80907800  | 2.24662900  | 0.13399400  |
| C  | 3.35243000  | -1.13937100 | -0.54450700 |
| C  | 4.17074300  | 0.14997300  | -0.14381400 |
| C  | 5.14204200  | -0.18440000 | 1.01357000  |
| C  | 3.42932200  | 1.19611500  | 2.00909300  |
| H  | 2.43285400  | 1.13306600  | 2.46745900  |
| H  | 3.91808200  | 2.09641700  | 2.41488600  |
| C  | 4.28492500  | -0.05468400 | 2.27702200  |
| H  | 4.88620000  | 0.02128500  | 3.19643000  |
| H  | 3.63699000  | -0.93952300 | 2.39064800  |
| H  | 5.95087900  | 0.56707300  | 1.03225400  |
| H  | 5.61955200  | -1.17097500 | 0.90439200  |
| H  | 3.57206700  | -1.93698900 | 0.18310600  |
| C  | 3.90039400  | -1.54324700 | -1.95023600 |
| H  | 4.03437500  | -2.62781000 | -2.05738100 |
| H  | 3.17365400  | -1.23298100 | -2.71637700 |
| C  | 5.20422900  | -0.76110900 | -2.13899500 |
| H  | 5.47556100  | -0.64946100 | -3.20045700 |
| H  | 6.04639300  | -1.27038300 | -1.64007300 |
| C  | 4.89259100  | 0.56045900  | -1.44528300 |
| H  | 5.77696300  | 1.18561500  | -1.24314000 |
| H  | 4.20779100  | 1.15326000  | -2.07693600 |
| Ru | -0.69322600 | 0.38464300  | -0.65648500 |



|   |             |             |             |
|---|-------------|-------------|-------------|
| C | -4.44876300 | -1.27969600 | -0.50857800 |
| C | -5.32942600 | -0.76608400 | -1.46015700 |
| C | -4.98691300 | 0.35183300  | -2.23724300 |
| C | -3.72776800 | 0.91336900  | -2.06287900 |
| C | -3.21041300 | -0.59745900 | -0.34996900 |
| H | -6.29878600 | -1.25197600 | -1.60661200 |
| H | -5.67360800 | 0.75512700  | -2.98359100 |
| H | -3.38145800 | 1.74766100  | -2.67973300 |
| C | -4.75647500 | -2.50415300 | 0.30535300  |
| H | -5.69106100 | -2.97860900 | -0.02964900 |
| H | -3.93954900 | -3.23957400 | 0.22883000  |
| H | -4.86080200 | -2.27008500 | 1.37773700  |
| N | -2.86789300 | 0.43710300  | -1.15348300 |
| N | -2.23975100 | -1.04227800 | 0.51845600  |
| C | -1.47492400 | -0.21004100 | 1.28945400  |
| C | -0.54468300 | -0.91104900 | 2.24549700  |
| C | -0.00164200 | -0.24506700 | 3.35934800  |
| C | -0.23124600 | -2.27245700 | 2.06907900  |
| C | 0.83340600  | -0.91284900 | 4.26095600  |
| H | -0.24699100 | 0.80339100  | 3.53724500  |
| C | 0.59974800  | -2.93818700 | 2.96981600  |
| H | -0.65788300 | -2.80110300 | 1.21632300  |
| C | 1.13953200  | -2.26281700 | 4.07161000  |
| H | 1.23780700  | -0.37400500 | 5.12229300  |
| H | 0.82440100  | -3.99706000 | 2.81368300  |
| H | 1.78597600  | -2.78751000 | 4.78030700  |
| C | -3.12124400 | 1.51974300  | 2.24439200  |
| C | -1.93848900 | 1.16611300  | 1.69687500  |
| H | -1.19891200 | 1.96566200  | 1.56507500  |
| C | -4.20610300 | 0.54898800  | 2.62195100  |
| H | -4.51452000 | 0.71910900  | 3.66864500  |
| H | -5.10987800 | 0.70322000  | 2.00633200  |
| H | -3.89366600 | -0.49804700 | 2.52479800  |
| C | -3.42035400 | 2.96423100  | 2.55171400  |
| H | -4.33183900 | 3.29368400  | 2.02070500  |
| H | -3.62247600 | 3.10904700  | 3.62822700  |
| H | -2.59731000 | 3.63331700  | 2.26025600  |

## VII

|   |             |             |             |
|---|-------------|-------------|-------------|
| C | -2.00068700 | -2.19025900 | -0.01069200 |
| C | -0.68510600 | -1.82779200 | 0.42244300  |
| C | 0.14002700  | -2.88058000 | 0.86166900  |
| C | -0.28058100 | -4.21867900 | 0.81579200  |
| C | -1.54650300 | -4.53973800 | 0.31879700  |

|    |             |             |             |
|----|-------------|-------------|-------------|
| C  | -2.41420600 | -3.52320300 | -0.09940200 |
| H  | 1.13967500  | -2.65830300 | 1.24266600  |
| H  | 0.39037400  | -5.01132900 | 1.15962500  |
| H  | -1.86891000 | -5.58294300 | 0.26088800  |
| H  | -3.40456300 | -3.77784200 | -0.48240900 |
| N  | -2.84541100 | -1.08418000 | -0.31200200 |
| C  | -2.12070200 | 0.06015700  | -0.32500000 |
| N  | -2.75452000 | 1.25734000  | -0.22505800 |
| C  | -1.89832600 | 2.24233600  | 0.32238900  |
| C  | -2.26221400 | 3.57937900  | 0.51166400  |
| C  | -0.62272800 | 1.73393800  | 0.73338700  |
| C  | -1.38270200 | 4.43763100  | 1.18589200  |
| H  | -3.22166200 | 3.95982100  | 0.15378600  |
| C  | 0.21413600  | 2.62749400  | 1.42135500  |
| C  | -0.15594500 | 3.96229800  | 1.65256500  |
| H  | -1.66652700 | 5.48170900  | 1.34471800  |
| H  | 1.19183200  | 2.29029200  | 1.77486500  |
| H  | 0.52722700  | 4.63226000  | 2.18227600  |
| C  | -4.14690000 | 1.44239900  | -0.59219200 |
| H  | -4.51263800 | 2.32398800  | -0.04926600 |
| C  | -4.31043600 | -1.16206200 | -0.14478900 |
| C  | -5.03415300 | 0.24279300  | -0.15349500 |
| C  | -6.14758300 | 0.25602800  | -1.22704900 |
| C  | -4.38292100 | 1.64681900  | -2.12412000 |
| H  | -3.43872600 | 1.56643700  | -2.68181900 |
| H  | -4.77769900 | 2.65863300  | -2.30738400 |
| C  | -5.41124000 | 0.57519600  | -2.53331700 |
| H  | -6.08818300 | 0.90857000  | -3.33513900 |
| H  | -4.89584900 | -0.32623900 | -2.90535100 |
| H  | -6.86183100 | 1.06535700  | -0.99389500 |
| H  | -6.72312800 | -0.68231800 | -1.26499800 |
| H  | -4.69542900 | -1.76052400 | -0.98655600 |
| C  | -4.72804600 | -1.82821100 | 1.20293300  |
| H  | -4.94592900 | -2.89978400 | 1.09623400  |
| H  | -3.89235000 | -1.73994400 | 1.91426000  |
| C  | -5.92410100 | -1.02037900 | 1.71794900  |
| H  | -6.06784600 | -1.12728900 | 2.80455200  |
| H  | -6.85960600 | -1.34780900 | 1.23261700  |
| C  | -5.56839200 | 0.39934200  | 1.28618200  |
| H  | -6.40761300 | 1.11121900  | 1.33731100  |
| H  | -4.76553100 | 0.78920000  | 1.93630100  |
| Ru | -0.16535100 | 0.00811500  | -0.21603900 |
| P  | 2.34559500  | -0.02493500 | -0.13410300 |
| C  | 3.14204400  | 1.63299200  | -0.37878100 |

|   |            |             |             |
|---|------------|-------------|-------------|
| C | 4.15915300 | 2.14277700  | 0.44271600  |
| C | 2.65964200 | 2.43136400  | -1.43211100 |
| C | 4.68603300 | 3.41896800  | 0.21094000  |
| H | 4.54604000 | 1.54735300  | 1.27194700  |
| C | 3.19298400 | 3.69914000  | -1.66885900 |
| H | 1.85478700 | 2.05927000  | -2.07347800 |
| C | 4.20826000 | 4.19798000  | -0.84512100 |
| H | 5.47563700 | 3.80295400  | 0.86253600  |
| H | 2.80707900 | 4.30453700  | -2.49317700 |
| H | 4.62068500 | 5.19450500  | -1.02375600 |
| C | 3.15271900 | -1.03173500 | -1.47559300 |
| C | 4.33178800 | -0.63503900 | -2.13061000 |
| C | 2.54116600 | -2.23817800 | -1.86192000 |
| C | 4.88776000 | -1.42885700 | -3.13880300 |
| H | 4.82232800 | 0.30139800  | -1.85768200 |
| C | 3.10095900 | -3.03224400 | -2.86660800 |
| H | 1.62108200 | -2.56515600 | -1.37204700 |
| C | 4.27539400 | -2.62953700 | -3.50890000 |
| H | 5.80481500 | -1.10403800 | -3.63780300 |
| H | 2.61087300 | -3.96714000 | -3.15085500 |
| H | 4.71015900 | -3.24753400 | -4.29900200 |
| C | 3.13764100 | -0.65956100 | 1.41704800  |
| C | 2.44308000 | -0.48791300 | 2.62760800  |
| C | 4.38683100 | -1.30282300 | 1.43539600  |
| C | 2.99623200 | -0.93140800 | 3.83215600  |
| H | 1.45404800 | -0.02264600 | 2.62010000  |
| C | 4.93381400 | -1.75318300 | 2.64088700  |
| H | 4.93798300 | -1.45962800 | 0.50568600  |
| C | 4.24235900 | -1.56513900 | 3.84152700  |
| H | 2.44362000 | -0.79105300 | 4.76483000  |
| H | 5.90465600 | -2.25603200 | 2.63987300  |
| H | 4.67084000 | -1.92018800 | 4.78262500  |

**INT3**

|   |             |             |             |
|---|-------------|-------------|-------------|
| C | -2.43399100 | -1.40155800 | 0.59111800  |
| C | -3.79976100 | -1.33987300 | 0.30549700  |
| C | -4.25508600 | -0.65186600 | -0.82340500 |
| C | -3.30524900 | -0.04150600 | -1.64349000 |
| C | -1.56059500 | -0.72269900 | -0.30418300 |
| H | -4.51070500 | -1.84462100 | 0.96654500  |
| H | -5.31849900 | -0.60173100 | -1.06784800 |
| H | -3.61604100 | 0.49240400  | -2.55004200 |
| C | -1.89285600 | -2.14824800 | 1.77810400  |
| H | -2.67800600 | -2.74461200 | 2.26697600  |

|   |             |             |             |
|---|-------------|-------------|-------------|
| H | -1.07101100 | -2.81843700 | 1.47850900  |
| H | -1.47094000 | -1.46462300 | 2.53467500  |
| N | -1.99676700 | -0.06939500 | -1.38965600 |
| N | -0.18932700 | -0.83686400 | -0.08977900 |
| C | 0.66680800  | 0.11347500  | -0.23798900 |
| C | 2.11623200  | -0.25161300 | -0.20152400 |
| C | 3.11639800  | 0.73124800  | -0.09110700 |
| C | 2.50608600  | -1.60324700 | -0.27740300 |
| C | 4.46691500  | 0.37432200  | -0.05630200 |
| H | 2.83527600  | 1.78374200  | -0.01991500 |
| C | 3.85277700  | -1.95806200 | -0.24377100 |
| H | 1.72859700  | -2.36385100 | -0.36643600 |
| C | 4.83946400  | -0.96992400 | -0.13350700 |
| H | 5.23097400  | 1.15102900  | 0.03297400  |
| H | 4.13884000  | -3.01135500 | -0.30758000 |
| H | 5.89623200  | -1.24917100 | -0.10954800 |
| C | -0.29291100 | 2.37210500  | 0.40812000  |
| C | 0.33520700  | 1.55095200  | -0.45513500 |
| H | 0.69195900  | 1.96609900  | -1.40508400 |
| C | -0.78277500 | 1.94999200  | 1.76743500  |
| H | -1.88557100 | 1.99612900  | 1.81382800  |
| H | -0.47383900 | 0.93232800  | 2.04184000  |
| H | -0.41137900 | 2.64174800  | 2.54385500  |
| C | -0.55551200 | 3.81140100  | 0.05070900  |
| H | -1.63986500 | 4.02340900  | 0.06801400  |
| H | -0.09509900 | 4.49644100  | 0.78501300  |
| H | -0.17517800 | 4.06950600  | -0.94873600 |

**TS4**

|   |             |             |             |
|---|-------------|-------------|-------------|
| C | -2.02698500 | -1.96635800 | 0.07965400  |
| C | -3.36327500 | -2.01734300 | -0.29497400 |
| C | -4.08730800 | -0.83954200 | -0.55218900 |
| C | -3.43248300 | 0.36914900  | -0.38495200 |
| C | -1.40542200 | -0.67445100 | 0.20804300  |
| H | -3.85241600 | -2.98989200 | -0.40218400 |
| H | -5.14119800 | -0.86721400 | -0.83621300 |
| H | -3.95145900 | 1.32295300  | -0.53100000 |
| C | -1.22137400 | -3.21407900 | 0.30465500  |
| H | -1.86672400 | -4.10572700 | 0.30341800  |
| H | -0.45850400 | -3.34374300 | -0.48107400 |
| H | -0.67623300 | -3.16971700 | 1.25984000  |
| N | -2.15746400 | 0.43772000  | 0.02004700  |
| N | -0.06225800 | -0.65538500 | 0.46116700  |
| C | 0.73552300  | 0.32989900  | 0.05116200  |

|   |             |             |             |
|---|-------------|-------------|-------------|
| C | 2.19393900  | 0.01668800  | -0.03647500 |
| C | 3.14885300  | 1.04483700  | -0.14667700 |
| C | 2.64900000  | -1.31449000 | 0.00225700  |
| C | 4.51190300  | 0.75204700  | -0.22960800 |
| H | 2.81815900  | 2.08593400  | -0.14303500 |
| C | 4.01058900  | -1.60765100 | -0.07284800 |
| H | 1.90964800  | -2.11125600 | 0.09003800  |
| C | 4.94853200  | -0.57570800 | -0.19296800 |
| H | 5.23818300  | 1.56539100  | -0.31115900 |
| H | 4.34452900  | -2.64853600 | -0.04218500 |
| H | 6.01580500  | -0.80581900 | -0.25278200 |
| C | -0.93392800 | 2.14338800  | 0.10238300  |
| C | 0.25260100  | 1.58659500  | -0.40270200 |
| H | 0.71963000  | 2.04424900  | -1.28099300 |
| C | -1.13224700 | 2.26054000  | 1.59758300  |
| H | -2.19510200 | 2.33183500  | 1.87289400  |
| H | -0.67443300 | 1.42613700  | 2.14468300  |
| H | -0.63385900 | 3.18865800  | 1.93305200  |
| C | -1.62484200 | 3.21657100  | -0.69976000 |
| H | -2.68309800 | 3.31720300  | -0.41401600 |
| H | -1.15038500 | 4.19203800  | -0.49169300 |
| H | -1.56294700 | 3.03060700  | -1.78160100 |

**3a**

|   |             |             |             |
|---|-------------|-------------|-------------|
| C | -2.08433500 | 1.96804100  | -0.07107800 |
| C | -3.45157900 | 1.88044200  | -0.06699500 |
| C | -4.10351000 | 0.61562400  | -0.02483600 |
| C | -3.33446300 | -0.50954500 | 0.01323600  |
| C | -1.27436400 | 0.75480700  | -0.03590400 |
| H | -4.04982100 | 2.79543800  | -0.09551300 |
| H | -5.19061000 | 0.53212700  | -0.02207400 |
| H | -3.78144200 | -1.50175500 | 0.04785000  |
| C | -1.35863500 | 3.28013500  | -0.10881100 |
| H | -2.06596400 | 4.12102900  | -0.16072500 |
| H | -0.72364300 | 3.40573100  | 0.78391400  |
| H | -0.67585000 | 3.33200600  | -0.97229500 |
| N | -1.96342300 | -0.46729900 | 0.00984200  |
| N | 0.02694300  | 0.86338900  | -0.04625600 |
| C | 0.80205600  | -0.28422000 | -0.00269200 |
| C | 2.27856100  | -0.05540600 | -0.00898200 |
| C | 3.20370300  | -1.08913400 | -0.25208100 |
| C | 2.78202400  | 1.23569300  | 0.23309000  |
| C | 4.57717700  | -0.84388200 | -0.23625300 |
| H | 2.85165200  | -2.09834100 | -0.47577600 |

|   |             |             |             |
|---|-------------|-------------|-------------|
| C | 4.15702400  | 1.48152600  | 0.25081900  |
| H | 2.06981100  | 2.04205300  | 0.40857400  |
| C | 5.06295800  | 0.44354900  | 0.01828000  |
| H | 5.27420300  | -1.66325600 | -0.43256800 |
| H | 4.52239600  | 2.49365700  | 0.44641400  |
| H | 6.13929100  | 0.63530900  | 0.02807300  |
| C | -1.23030500 | -1.78826700 | 0.06050900  |
| C | 0.25612800  | -1.52187200 | 0.06351800  |
| H | 0.87901000  | -2.41409600 | 0.13599700  |
| C | -1.59675000 | -2.63139900 | -1.18065100 |
| H | -2.65486000 | -2.93821800 | -1.19083100 |
| H | -1.38311400 | -2.07428900 | -2.10526100 |
| H | -0.98950600 | -3.55017000 | -1.19025700 |
| C | -1.61466700 | -2.54475200 | 1.35080700  |
| H | -2.67093500 | -2.85688400 | 1.36581000  |
| H | -1.00319200 | -3.45685900 | 1.43363600  |
| H | -1.41820600 | -1.92415900 | 2.23806600  |

#### INT4

|    |             |             |             |
|----|-------------|-------------|-------------|
| Ru | 1.53967300  | 0.10279900  | -0.40852700 |
| N  | -0.98913800 | -0.98920100 | 0.68375500  |
| N  | 0.25471800  | 0.19576400  | 2.26304800  |
| C  | -2.13517600 | -0.47236200 | 2.88323100  |
| C  | -2.61289000 | -1.47193100 | 3.96333300  |
| H  | -3.69623200 | -1.63732000 | 3.83179800  |
| H  | -2.46873800 | -1.08202200 | 4.98462000  |
| C  | -1.85277500 | -2.76671200 | 3.67339300  |
| H  | -0.81342600 | -2.69041200 | 4.03480400  |
| H  | -2.29690200 | -3.64693300 | 4.16445700  |
| C  | -1.87917200 | -2.85812100 | 2.13769500  |
| H  | -2.74349900 | -3.45435600 | 1.80554600  |
| H  | -0.97955700 | -3.33769700 | 1.72618400  |
| C  | -2.03831800 | -1.38934500 | 1.62839400  |
| H  | -2.98354200 | -1.26549300 | 1.08330800  |
| C  | -3.12495500 | 0.72532000  | 2.70438300  |
| H  | -3.85448200 | 0.70331000  | 3.53186500  |
| H  | -3.68681300 | 0.65599200  | 1.75846700  |
| C  | -2.28343200 | 1.99817000  | 2.81020900  |
| H  | -2.85752600 | 2.87066500  | 3.16126700  |
| H  | -1.85684500 | 2.26762200  | 1.83016300  |
| C  | -1.16146700 | 1.60154600  | 3.76752000  |
| H  | -0.31403900 | 2.29940900  | 3.77261100  |
| H  | -1.54793300 | 1.54748600  | 4.80014500  |
| C  | -0.77164300 | 0.16935400  | 3.32525200  |

|   |             |             |             |
|---|-------------|-------------|-------------|
| H | -0.33646500 | -0.39749800 | 4.16370700  |
| C | 0.11280000  | -0.28789000 | 1.00791300  |
| C | -1.01770300 | -1.44131400 | -0.66164500 |
| C | -2.05272000 | -2.22581700 | -1.18603900 |
| H | -2.89743700 | -2.53706700 | -0.57282100 |
| C | -2.01564500 | -2.58790400 | -2.54128200 |
| H | -2.82462700 | -3.19541000 | -2.95495100 |
| C | -0.95636800 | -2.17173900 | -3.35243600 |
| H | -0.92817300 | -2.45386200 | -4.40919600 |
| C | 0.09024100  | -1.41087000 | -2.79766600 |
| H | 0.92544900  | -1.12137000 | -3.44295300 |
| C | 0.08676900  | -1.02881000 | -1.44646500 |
| C | 1.55107700  | 0.73504100  | 2.51665600  |
| C | 2.40156400  | 0.77557000  | 1.38539600  |
| C | 3.70633000  | 1.25242300  | 1.57670000  |
| H | 4.40134500  | 1.28839800  | 0.73254900  |
| C | 4.15405000  | 1.68793700  | 2.83518400  |
| H | 5.17403200  | 2.06539700  | 2.95320900  |
| C | 3.30171200  | 1.61199000  | 3.93646900  |
| H | 3.64760500  | 1.92105500  | 4.92658500  |
| C | 1.99403300  | 1.12705100  | 3.78636100  |
| C | 4.94829900  | -0.67418100 | -2.92102600 |
| C | 3.85945800  | -0.64547200 | -2.00363500 |
| C | 3.30145600  | 1.54224600  | -2.64607900 |
| C | 4.34430100  | 1.58987900  | -3.55472300 |
| C | 5.17301700  | 0.46161000  | -3.68981100 |
| H | 2.63312400  | 2.39467100  | -2.50756200 |
| H | 4.51087600  | 2.49035500  | -4.14869100 |
| H | 6.00195400  | 0.47537300  | -4.40323300 |
| N | 3.59621600  | -1.71154300 | -1.19987100 |
| N | 3.05469500  | 0.45417300  | -1.88452100 |
| C | 5.79824700  | -1.90881400 | -3.02176700 |
| H | 5.19161400  | -2.78565800 | -3.30077900 |
| H | 6.25658800  | -2.15489100 | -2.05043400 |
| H | 6.59816300  | -1.78385600 | -3.76709100 |
| C | 2.59481300  | -1.56499800 | -0.35560400 |
| H | 1.35134700  | 1.05771900  | 4.66415900  |
| C | 2.31631100  | -2.76674600 | 0.48766000  |
| C | 2.18193000  | -4.02123600 | -0.13871000 |
| C | 2.23134500  | -2.70533700 | 1.88877800  |
| C | 1.94938700  | -5.17449500 | 0.61255600  |
| H | 2.25880400  | -4.07835700 | -1.22622800 |
| C | 2.02939900  | -3.86598900 | 2.64171900  |
| H | 2.36144600  | -1.74753200 | 2.39274200  |

|    |             |             |             |
|----|-------------|-------------|-------------|
| C  | 1.87737000  | -5.10302300 | 2.00789200  |
| H  | 1.83337700  | -6.13696300 | 0.10627100  |
| H  | 1.99525100  | -3.80261800 | 3.73296000  |
| H  | 1.70852500  | -6.00790600 | 2.59805800  |
| C  | 0.23851400  | 4.72136300  | 0.58557100  |
| C  | -0.56638600 | 3.91799400  | -0.12070600 |
| H  | -1.65549100 | 3.95501500  | -0.09443300 |
| C  | 1.73817400  | 4.68697000  | 0.58131700  |
| H  | 2.15236800  | 3.97556300  | -0.14375300 |
| H  | 2.11328100  | 4.40582300  | 1.58000700  |
| H  | 2.14162200  | 5.69015500  | 0.36097500  |
| C  | -0.39645200 | 5.75225800  | 1.48642900  |
| H  | -0.07717100 | 6.76816000  | 1.19521800  |
| H  | -0.06688800 | 5.60258100  | 2.52909200  |
| H  | -1.49514900 | 5.71513300  | 1.46363100  |
| Br | 0.03942300  | 2.54121200  | -1.32353700 |
| K  | -2.78190100 | 0.57005400  | -2.45859700 |
| C  | -5.24402200 | 0.09081400  | -0.92043100 |
| O  | -6.29096000 | -0.25367700 | -0.27133800 |
| O  | -5.28821800 | 0.14758500  | -2.24627100 |
| K  | -7.68741000 | -0.54724600 | -2.27995400 |
| O  | -4.13690100 | 0.38077700  | -0.33235000 |

**TS5**

|    |             |             |             |
|----|-------------|-------------|-------------|
| Ru | 1.48325700  | 0.18271500  | -0.32563200 |
| N  | -1.00371900 | -1.06672200 | 0.66786200  |
| N  | 0.23356000  | -0.00016700 | 2.32683100  |
| C  | -2.18232300 | -0.61370500 | 2.85744400  |
| C  | -2.70938300 | -1.62822100 | 3.89752100  |
| H  | -3.78440200 | -1.79147200 | 3.71001600  |
| H  | -2.61454200 | -1.25436100 | 4.93042700  |
| C  | -1.93293800 | -2.91898900 | 3.62639200  |
| H  | -0.92031800 | -2.85259900 | 4.06010800  |
| H  | -2.40998000 | -3.80688000 | 4.06993500  |
| C  | -1.85812200 | -2.98276900 | 2.08864600  |
| H  | -2.66653400 | -3.61272600 | 1.68721800  |
| H  | -0.91173100 | -3.41188900 | 1.72895900  |
| C  | -2.05480900 | -1.51514200 | 1.59328000  |
| H  | -3.00160300 | -1.41442100 | 1.04140000  |
| C  | -3.14539300 | 0.60160800  | 2.66445300  |
| H  | -3.86751600 | 0.60998700  | 3.49897000  |
| H  | -3.72560000 | 0.50913300  | 1.73341000  |
| C  | -2.27573800 | 1.85865600  | 2.74425900  |
| H  | -2.83591100 | 2.75433100  | 3.05613500  |



|   |             |             |             |
|---|-------------|-------------|-------------|
| H | -1.81822300 | 2.09183900  | 1.76828400  |
| C | -1.19107400 | 1.46108600  | 3.74667200  |
| H | -0.32170600 | 2.13322900  | 3.75384100  |
| H | -1.60691000 | 1.44873500  | 4.76906200  |
| C | -0.82653900 | 0.00906600  | 3.35297900  |
| H | -0.43430100 | -0.55294900 | 4.21489100  |
| C | 0.08443800  | -0.37670100 | 1.03513900  |
| C | -0.93075600 | -1.52300600 | -0.66516500 |
| C | -1.91804800 | -2.29344300 | -1.29315700 |
| H | -2.83544700 | -2.56129000 | -0.77029700 |
| C | -1.73002400 | -2.67061200 | -2.62860200 |
| H | -2.49724000 | -3.26740700 | -3.12849500 |
| C | -0.57013600 | -2.29425500 | -3.31559700 |
| H | -0.42713200 | -2.59337000 | -4.35773300 |
| C | 0.42097700  | -1.54256000 | -2.66520100 |
| H | 1.32878700  | -1.27197200 | -3.20976100 |
| C | 0.24477900  | -1.12630400 | -1.34010800 |
| C | 1.55889300  | 0.39520300  | 2.61144900  |
| C | 2.43277500  | 0.32790700  | 1.49622600  |
| C | 3.78882500  | 0.61156300  | 1.69353200  |
| H | 4.49332200  | 0.52826800  | 0.86307300  |
| C | 4.26279700  | 1.00703400  | 2.95386500  |
| H | 5.32158400  | 1.24396800  | 3.08782800  |
| C | 3.38408000  | 1.07728100  | 4.03601200  |
| H | 3.75255000  | 1.36643000  | 5.02385000  |
| C | 2.02668900  | 0.76898000  | 3.87698600  |
| C | 5.03656800  | 0.23011500  | -2.80973800 |
| C | 3.91855800  | -0.02998100 | -1.97162700 |
| C | 3.12272800  | 2.15656200  | -2.23571200 |
| C | 4.18993100  | 2.49017900  | -3.05520800 |
| C | 5.15209600  | 1.51071300  | -3.34373300 |
| H | 2.33826600  | 2.87618900  | -1.99590900 |
| H | 4.26641700  | 3.49886300  | -3.46507100 |
| H | 6.00166200  | 1.75087200  | -3.98925000 |
| N | 3.75811100  | -1.25529000 | -1.38868800 |
| N | 2.98504300  | 0.92586400  | -1.70320000 |
| C | 6.04203500  | -0.85421800 | -3.07750200 |
| H | 5.57153900  | -1.72552600 | -3.56150600 |
| H | 6.48361800  | -1.22810700 | -2.13993000 |
| H | 6.85296400  | -0.49151700 | -3.72675500 |
| C | 2.75123900  | -1.40157900 | -0.56462300 |
| H | 1.35943700  | 0.81708400  | 4.73792100  |
| C | 2.60818900  | -2.77333600 | 0.00724100  |
| C | 3.02490200  | -3.88308000 | -0.75875700 |

|    |             |             |             |
|----|-------------|-------------|-------------|
| C  | 2.10392800  | -3.01414600 | 1.29671400  |
| C  | 2.92488100  | -5.18057100 | -0.25916000 |
| H  | 3.42693900  | -3.70532800 | -1.75714200 |
| C  | 2.02794900  | -4.31274100 | 1.80823600  |
| H  | 1.79746900  | -2.17555200 | 1.91850100  |
| C  | 2.42894000  | -5.40212300 | 1.03057500  |
| H  | 3.23943100  | -6.02580700 | -0.87755400 |
| H  | 1.65269500  | -4.47255200 | 2.82260400  |
| H  | 2.35708200  | -6.41856200 | 1.42692400  |
| C  | -0.13308400 | 5.21014900  | 0.66354800  |
| C  | -0.87112600 | 4.38460300  | -0.06511400 |
| H  | -1.90271000 | 4.45312900  | -0.41675400 |
| C  | 1.29421300  | 4.94290300  | 1.07242000  |
| H  | 1.64511500  | 3.95920300  | 0.73461200  |
| H  | 1.39852600  | 4.98756700  | 2.17070300  |
| H  | 1.96767800  | 5.71623900  | 0.66157800  |
| C  | -0.71249700 | 6.52849500  | 1.14751300  |
| H  | -0.09968400 | 7.37539200  | 0.79055000  |
| H  | -0.70549800 | 6.57120300  | 2.25126600  |
| H  | -1.74614800 | 6.68334400  | 0.80496000  |
| Br | -0.10653400 | 2.16953900  | -0.99316200 |
| K  | -2.88893100 | 0.62465500  | -2.11083300 |
| C  | -5.42118200 | -0.35763500 | -0.92957700 |
| O  | -6.50810000 | -0.84923000 | -0.47254900 |
| O  | -5.40377800 | 0.16735700  | -2.14775600 |
| K  | -7.83514100 | -0.30464900 | -2.47520000 |
| O  | -4.32731600 | -0.35336200 | -0.24876000 |

### VIII

|    |             |             |             |
|----|-------------|-------------|-------------|
| Ru | -0.73596400 | -0.56275900 | -0.18125600 |
| N  | 1.85626900  | 0.42768400  | -1.13704200 |
| N  | 1.94989900  | -0.50426700 | 1.00052300  |
| C  | 4.08865300  | -0.25900900 | -0.29519800 |
| C  | 5.40425200  | 0.52326800  | -0.09048800 |
| H  | 5.99770100  | 0.44125500  | -1.01623000 |
| H  | 6.02338600  | 0.10687400  | 0.71979100  |
| C  | 4.99164100  | 1.98997400  | 0.14613700  |
| H  | 4.88881400  | 2.19841900  | 1.22243700  |
| H  | 5.75266000  | 2.68864100  | -0.23237000 |
| C  | 3.62548700  | 2.15780100  | -0.56877900 |
| H  | 3.65621100  | 2.90648100  | -1.37376800 |
| H  | 2.84280700  | 2.48703200  | 0.12947100  |
| C  | 3.27879000  | 0.75357900  | -1.12929300 |
| H  | 3.63633100  | 0.67558400  | -2.16640000 |

|   |             |             |             |
|---|-------------|-------------|-------------|
| C | 4.27700300  | -1.64589000 | -0.98600100 |
| H | 5.32571000  | -1.75560300 | -1.30508100 |
| H | 3.65977800  | -1.72439100 | -1.89396900 |
| C | 3.88713800  | -2.72383900 | 0.04414400  |
| H | 4.55542400  | -3.59815600 | 0.02264700  |
| H | 2.86786200  | -3.08743700 | -0.15632800 |
| C | 3.92289900  | -1.99995400 | 1.39331200  |
| H | 3.33898900  | -2.50832700 | 2.17149100  |
| H | 4.95818800  | -1.91657900 | 1.76503000  |
| C | 3.42343000  | -0.57253000 | 1.08250200  |
| H | 3.74118400  | 0.14316200  | 1.85789400  |
| C | 1.23846200  | -0.16360100 | -0.09961700 |
| C | 0.94832200  | 0.90823200  | -2.09819300 |
| C | 1.30469600  | 1.52615700  | -3.30099900 |
| H | 2.35174200  | 1.67513700  | -3.57088900 |
| C | 0.29190800  | 1.95652200  | -4.16430000 |
| H | 0.55971400  | 2.44106500  | -5.10671700 |
| C | -1.05183800 | 1.77914000  | -3.82437600 |
| H | -1.83888800 | 2.11980300  | -4.50225600 |
| C | -1.39882600 | 1.17800700  | -2.60593900 |
| H | -2.45359300 | 1.07008200  | -2.34574000 |
| C | -0.40403600 | 0.71066600  | -1.74006000 |
| C | 1.10477500  | -0.72266300 | 2.10881500  |
| C | -0.27294700 | -0.57759400 | 1.80924800  |
| C | -1.20147300 | -0.70213300 | 2.84807000  |
| H | -2.26684100 | -0.56471400 | 2.65423300  |
| C | -0.77715700 | -1.00424300 | 4.15007500  |
| H | -1.51589500 | -1.11953200 | 4.94746200  |
| C | 0.58480900  | -1.13088100 | 4.42945800  |
| H | 0.91862200  | -1.33591500 | 5.44993400  |
| C | 1.53738400  | -0.98565400 | 3.41422900  |
| C | -5.07225400 | -0.37545000 | 0.12199000  |
| C | -3.66523000 | -0.19038900 | 0.08631900  |
| C | -3.32195300 | -2.37720600 | -0.67806100 |
| C | -4.68545100 | -2.63526300 | -0.67236400 |
| C | -5.56255400 | -1.62080400 | -0.26670200 |
| H | -2.58919000 | -3.12647600 | -0.98510900 |
| H | -5.05421700 | -3.61515500 | -0.98061100 |
| H | -6.64099800 | -1.80250600 | -0.25274700 |
| N | -3.11377600 | 1.00764800  | 0.45137600  |
| N | -2.82179200 | -1.18407700 | -0.30620400 |
| C | -5.96995500 | 0.74567000  | 0.56458500  |
| H | -5.85642100 | 1.62780100  | -0.08617900 |
| H | -5.71731900 | 1.08180400  | 1.58292000  |

|    |             |             |             |
|----|-------------|-------------|-------------|
| H  | -7.02591400 | 0.43693400  | 0.55030800  |
| C  | -1.80974200 | 1.10668500  | 0.42791700  |
| H  | 2.59750400  | -1.06645700 | 3.65504000  |
| C  | -1.28570100 | 2.46031700  | 0.78186700  |
| C  | -2.13469400 | 3.58266300  | 0.66375400  |
| C  | 0.02326100  | 2.67694600  | 1.24631600  |
| C  | -1.68814500 | 4.86309800  | 0.98427300  |
| H  | -3.15363000 | 3.42417800  | 0.30940300  |
| C  | 0.46629600  | 3.95713200  | 1.58899000  |
| H  | 0.69588200  | 1.83091300  | 1.36508100  |
| C  | -0.38390300 | 5.05734700  | 1.45328900  |
| H  | -2.36199300 | 5.71679100  | 0.87052200  |
| H  | 1.48304800  | 4.09516800  | 1.96652400  |
| H  | -0.03397800 | 6.06039900  | 1.71188300  |
| Br | 0.04758500  | -2.82715500 | -1.14321500 |

#### INT6

|   |            |             |             |
|---|------------|-------------|-------------|
| C | 2.65121800 | 2.33309200  | 0.93389200  |
| C | 1.86472100 | 1.22040500  | 1.35676700  |
| C | 1.13081500 | 1.42012600  | 2.53896200  |
| C | 1.16347600 | 2.62135200  | 3.26829500  |
| C | 1.93945600 | 3.68618000  | 2.81332700  |
| C | 2.68721300 | 3.54721000  | 1.63372200  |
| H | 0.49752500 | 0.60990900  | 2.91859700  |
| H | 0.58009500 | 2.72151100  | 4.18936400  |
| H | 1.97180100 | 4.63011700  | 3.36510900  |
| H | 3.28170900 | 4.39378100  | 1.28707900  |
| N | 3.37429700 | 2.14298200  | -0.29155800 |
| C | 3.08515100 | 0.96487700  | -0.92353600 |
| N | 3.44020200 | 0.78442400  | -2.22598600 |
| C | 3.02805700 | -0.45729300 | -2.81035200 |
| C | 3.30079200 | -0.77654600 | -4.14670600 |
| C | 2.34400500 | -1.34060400 | -1.92623500 |
| C | 2.91234100 | -2.02860000 | -4.64632700 |
| H | 3.80551000 | -0.07571000 | -4.81542300 |
| C | 1.98021600 | -2.58098800 | -2.47867200 |
| C | 2.25681400 | -2.93338800 | -3.81074100 |
| H | 3.12338600 | -2.28312500 | -5.68895800 |
| H | 1.45647200 | -3.31027900 | -1.84987400 |
| H | 1.95428000 | -3.91318100 | -4.19510100 |
| C | 4.00795900 | 1.86597200  | -3.01583900 |
| H | 4.65400700 | 1.41421500  | -3.78306600 |
| C | 4.24568300 | 3.20379200  | -0.82849900 |
| C | 4.90205900 | 2.78770100  | -2.17497100 |

|    |             |             |             |
|----|-------------|-------------|-------------|
| C  | 5.05045800  | 4.01128700  | -3.10707600 |
| C  | 2.97753600  | 2.79808400  | -3.70060400 |
| H  | 2.07561200  | 2.86553000  | -3.07359400 |
| H  | 2.65324300  | 2.39644100  | -4.67169400 |
| C  | 3.68343200  | 4.17352000  | -3.81538900 |
| H  | 3.81670300  | 4.48786700  | -4.86177200 |
| H  | 3.07979900  | 4.95833400  | -3.33396800 |
| H  | 5.83786800  | 3.79083500  | -3.84705900 |
| H  | 5.36344000  | 4.92181600  | -2.57292600 |
| H  | 3.62014300  | 4.10166100  | -0.96647100 |
| C  | 5.45478600  | 3.52391600  | 0.11216800  |
| H  | 5.48260000  | 4.59326700  | 0.37051100  |
| H  | 5.33490600  | 2.98196500  | 1.05921600  |
| C  | 6.73917900  | 3.08551900  | -0.62970200 |
| H  | 7.46242400  | 2.59349100  | 0.03880500  |
| H  | 7.25164300  | 3.96017200  | -1.06228100 |
| C  | 6.24209200  | 2.16516300  | -1.74785100 |
| H  | 6.94653100  | 2.07460400  | -2.59030400 |
| H  | 6.06802600  | 1.14738100  | -1.35982600 |
| Ru | 2.02126900  | -0.36078400 | -0.06042300 |
| P  | 3.59793700  | -1.45305300 | 1.13114900  |
| C  | 5.20541500  | -2.14188300 | 0.48397900  |
| C  | 6.16072800  | -2.68788600 | 1.36269000  |
| C  | 5.48102000  | -2.13993400 | -0.89172000 |
| C  | 7.35575600  | -3.22067000 | 0.87446900  |
| H  | 5.97488900  | -2.69904500 | 2.43846400  |
| C  | 6.68217000  | -2.66866300 | -1.37871000 |
| H  | 4.74717400  | -1.73493400 | -1.58704900 |
| C  | 7.62174400  | -3.20999800 | -0.49908500 |
| H  | 8.08442800  | -3.64266700 | 1.57200100  |
| H  | 6.87672000  | -2.65629200 | -2.45436700 |
| H  | 8.55997700  | -3.62260300 | -0.88011300 |
| C  | 2.60442300  | -2.95644300 | 1.55992700  |
| C  | 2.94784100  | -4.24610800 | 1.11749600  |
| C  | 1.39171900  | -2.77935300 | 2.25622900  |
| C  | 2.10728800  | -5.33204400 | 1.37598000  |
| H  | 3.87519800  | -4.40626400 | 0.56481700  |
| C  | 0.55436500  | -3.86933500 | 2.51256000  |
| H  | 1.10269300  | -1.78610900 | 2.60801100  |
| C  | 0.91025400  | -5.14857600 | 2.07556900  |
| H  | 2.39182700  | -6.32873300 | 1.02787700  |
| H  | -0.37776200 | -3.71050500 | 3.06040600  |
| H  | 0.25831100  | -6.00211900 | 2.28064600  |
| C  | 4.18751900  | -0.79716600 | 2.77015700  |

|    |             |             |             |
|----|-------------|-------------|-------------|
| C  | 4.93612800  | 0.39211500  | 2.76540400  |
| C  | 3.93071500  | -1.42354000 | 3.99928200  |
| C  | 5.41434800  | 0.94174800  | 3.95525400  |
| H  | 5.14631300  | 0.89451600  | 1.81893900  |
| C  | 4.40689200  | -0.86969900 | 5.19400700  |
| H  | 3.36090100  | -2.35341600 | 4.03655300  |
| C  | 5.14800600  | 0.31302700  | 5.17651700  |
| H  | 5.99112400  | 1.87014700  | 3.93073000  |
| H  | 4.19596300  | -1.37176800 | 6.14230400  |
| H  | 5.51736200  | 0.74568500  | 6.11012600  |
| Ru | -2.88807100 | 0.86936900  | -0.06999000 |
| N  | -3.49443700 | -1.95236100 | 0.53978200  |
| N  | -3.92655400 | -1.37286300 | -1.67819400 |
| C  | -3.70899000 | -3.80784400 | -1.09778900 |
| C  | -4.64398100 | -5.03614400 | -1.15109000 |
| H  | -4.13778500 | -5.87298500 | -0.64178600 |
| H  | -4.84853400 | -5.37002500 | -2.18046300 |
| C  | -5.91216500 | -4.63365100 | -0.37471700 |
| H  | -6.66441000 | -4.20284300 | -1.05392900 |
| H  | -6.38878600 | -5.50350000 | 0.10165600  |
| C  | -5.44674100 | -3.57320100 | 0.65654600  |
| H  | -5.58483700 | -3.90583800 | 1.69568300  |
| H  | -6.01098400 | -2.63543200 | 0.55494500  |
| C  | -3.94502500 | -3.32831400 | 0.34844900  |
| H  | -3.32828300 | -3.96319200 | 1.00129600  |
| C  | -2.21824700 | -4.13307200 | -1.42341500 |
| H  | -2.08787400 | -5.22514100 | -1.48511400 |
| H  | -1.55034400 | -3.78233000 | -0.62202500 |
| C  | -1.88387200 | -3.44550400 | -2.76198500 |
| H  | -1.27915100 | -4.07708200 | -3.42950700 |
| H  | -1.30521200 | -2.52740400 | -2.58406700 |
| C  | -3.24388300 | -3.09488700 | -3.37259700 |
| H  | -3.18387600 | -2.29178500 | -4.11819300 |
| H  | -3.68719400 | -3.97145100 | -3.87464300 |
| C  | -4.14137200 | -2.75268000 | -2.16365700 |
| H  | -5.21037300 | -2.84456300 | -2.41614300 |
| C  | -3.50650400 | -1.03129800 | -0.43860200 |
| C  | -3.22962500 | -1.38915200 | 1.80113800  |
| C  | -3.12459000 | -2.10698300 | 2.99668200  |
| H  | -3.25305300 | -3.19052300 | 3.01714900  |
| C  | -2.85945200 | -1.40924500 | 4.18045300  |
| H  | -2.77756900 | -1.95952700 | 5.12127100  |
| C  | -2.71103400 | -0.01979100 | 4.16708300  |
| H  | -2.50316100 | 0.51925900  | 5.09490200  |

|    |             |             |             |
|----|-------------|-------------|-------------|
| C  | -2.84695700 | 0.69427200  | 2.96754800  |
| H  | -2.75211800 | 1.78165400  | 2.97959600  |
| C  | -3.08198000 | 0.01426500  | 1.76776100  |
| C  | -4.25783500 | -0.23097500 | -2.43918600 |
| C  | -4.03559200 | 0.98909200  | -1.75526900 |
| C  | -4.39847400 | 2.18692000  | -2.37976400 |
| H  | -4.27074100 | 3.14030300  | -1.86446900 |
| C  | -4.93101400 | 2.17814300  | -3.67712600 |
| H  | -5.18689900 | 3.12279200  | -4.16379600 |
| C  | -5.15751200 | 0.96600800  | -4.33091500 |
| H  | -5.60262900 | 0.95594500  | -5.32909600 |
| C  | -4.83109600 | -0.24833900 | -3.71598500 |
| C  | -2.80319800 | 5.09141700  | 0.90189600  |
| C  | -3.06506500 | 3.71475500  | 0.69413800  |
| C  | -0.88006000 | 3.32987200  | -0.06068500 |
| C  | -0.54729500 | 4.66686100  | 0.11399600  |
| C  | -1.52065400 | 5.54811000  | 0.59676400  |
| H  | -0.15656500 | 2.59699500  | -0.41805300 |
| H  | 0.46406500  | 5.00500900  | -0.11209200 |
| H  | -1.27833300 | 6.60447500  | 0.74360100  |
| N  | -4.30232700 | 3.19068100  | 0.96400800  |
| N  | -2.11273400 | 2.86676100  | 0.21529000  |
| C  | -3.87890400 | 5.99796400  | 1.43168000  |
| H  | -4.21467800 | 5.67832600  | 2.43162800  |
| H  | -4.77287100 | 5.98132200  | 0.78821200  |
| H  | -3.52018500 | 7.03565400  | 1.50385300  |
| C  | -4.49267000 | 1.92778700  | 0.69819400  |
| H  | -5.03615600 | -1.18529800 | -4.23295100 |
| C  | -5.84144800 | 1.40812700  | 1.07272000  |
| C  | -6.55283200 | 2.04072800  | 2.11556300  |
| C  | -6.45688600 | 0.32550400  | 0.42112600  |
| C  | -7.81887400 | 1.59960200  | 2.49576400  |
| H  | -6.08611000 | 2.88566600  | 2.62319600  |
| C  | -7.73709700 | -0.10149400 | 0.78443800  |
| H  | -5.94308000 | -0.16957800 | -0.39936000 |
| C  | -8.42096000 | 0.52728600  | 1.82787100  |
| H  | -8.34274600 | 2.09756300  | 3.31630200  |
| H  | -8.20422400 | -0.93062100 | 0.24616200  |
| H  | -9.41772200 | 0.18531900  | 2.11931700  |
| Br | -0.57002100 | -0.06571500 | -0.98689300 |

**1a**

|   |             |            |            |
|---|-------------|------------|------------|
| C | -2.63967100 | 0.94734100 | 0.07084900 |
| C | -3.98637500 | 0.56844800 | 0.07476700 |

|   |             |             |             |
|---|-------------|-------------|-------------|
| C | -4.34029600 | -0.77758500 | -0.03636800 |
| C | -3.31419100 | -1.71900100 | -0.15192300 |
| C | -1.68219800 | -0.09475100 | -0.04495400 |
| H | -4.76095100 | 1.33605400  | 0.16114600  |
| H | -5.38654800 | -1.09135700 | -0.04019200 |
| H | -3.54762600 | -2.78632900 | -0.24898400 |
| C | -2.21663600 | 2.38574100  | 0.18298400  |
| H | -3.09016000 | 3.05500300  | 0.19347500  |
| H | -1.63600200 | 2.56591500  | 1.10225300  |
| H | -1.56300800 | 2.67470400  | -0.65490300 |
| N | -2.02681200 | -1.38385400 | -0.15565700 |
| N | -0.32839200 | 0.27529200  | -0.05826800 |
| C | 0.58380100  | -0.61566900 | 0.07957800  |
| C | 2.01543000  | -0.29785200 | 0.03538800  |
| C | 2.95508000  | -1.33178500 | 0.20310300  |
| C | 2.47656600  | 1.01751400  | -0.17403000 |
| C | 4.32424700  | -1.06106900 | 0.16259400  |
| H | 2.60264100  | -2.35449800 | 0.36533700  |
| C | 3.84227700  | 1.28532800  | -0.21395000 |
| H | 1.74138900  | 1.81416600  | -0.30339400 |
| C | 4.76994900  | 0.24744800  | -0.04609300 |
| H | 5.04554400  | -1.87179500 | 0.29342900  |
| H | 4.19235500  | 2.30803100  | -0.37746500 |
| H | 5.84152900  | 0.46182900  | -0.07862500 |
| H | 0.31937800  | -1.67643700 | 0.23373700  |

**2a**

|    |             |             |             |
|----|-------------|-------------|-------------|
| C  | -1.44949500 | -0.02921300 | 0.00007500  |
| C  | -0.31452100 | -0.74209300 | 0.00000000  |
| H  | -0.29916900 | -1.83353600 | -0.00000900 |
| C  | -1.53238400 | 1.47002200  | 0.00011900  |
| H  | -2.09024200 | 1.82426600  | 0.88482200  |
| H  | -0.54454200 | 1.94910700  | -0.00027600 |
| H  | -2.09096400 | 1.82428900  | -0.88411400 |
| C  | -2.76896800 | -0.76150000 | 0.00016100  |
| H  | -3.36868000 | -0.48471800 | 0.88545600  |
| H  | -3.36875100 | -0.48480500 | -0.88511100 |
| H  | -2.64361000 | -1.85438600 | 0.00021200  |
| Br | 1.45137600  | -0.01610000 | -0.00008900 |

**K<sub>2</sub>CO<sub>3</sub>**

|   |             |             |             |
|---|-------------|-------------|-------------|
| K | 2.49260700  | -0.61429800 | 0.00422200  |
| C | -0.00006600 | 0.80879900  | -0.00024600 |
| O | -1.12223600 | 1.42133900  | 0.02201300  |



|   |             |             |             |
|---|-------------|-------------|-------------|
| O | -0.00018700 | -0.53083300 | -0.00023900 |
| K | -2.49256700 | -0.61434400 | -0.00410000 |
| O | 1.12237600  | 1.42091800  | -0.02187900 |

**PPh<sub>3</sub>**

|   |             |             |             |
|---|-------------|-------------|-------------|
| P | -0.00110400 | 0.00013400  | -1.19873100 |
| C | 0.96332200  | -1.36722900 | -0.39804200 |
| C | 0.88416900  | -2.63684200 | -1.00042300 |
| H | 0.26459500  | -2.77517600 | -1.89173200 |
| C | 1.58951500  | -3.72287200 | -0.47716300 |
| H | 1.51154700  | -4.70279000 | -0.95582400 |
| C | 2.40406500  | -3.55324800 | 0.64726900  |
| H | 2.96468100  | -4.39990400 | 1.05227200  |
| C | 2.50324500  | -2.29390800 | 1.24516800  |
| H | 3.14129600  | -2.15252900 | 2.12190100  |
| C | 1.78697800  | -1.20865700 | 0.72899900  |
| H | 1.87348700  | -0.23195700 | 1.21001300  |
| C | -1.66733700 | -0.14994000 | -0.39745000 |
| C | -1.94343400 | -0.94551400 | 0.72700600  |
| H | -1.14164900 | -1.51050400 | 1.20735300  |
| C | -3.24187400 | -1.02328500 | 1.24203700  |
| C | -4.28173400 | -0.30492200 | 0.64561600  |
| H | -5.29552600 | -0.36743600 | 1.04985200  |
| C | -4.01953200 | 0.48895900  | -0.47584600 |
| H | -4.82808900 | 1.04893600  | -0.95344100 |
| C | -2.72590600 | 0.55718700  | -0.99777400 |
| H | -2.53437700 | 1.16637600  | -1.88644100 |
| H | -3.43939600 | -1.64870800 | 2.11698800  |
| C | 0.70203400  | 1.51844600  | -0.39851300 |
| C | 0.15055700  | 2.15724400  | 0.72455400  |
| C | 1.84626600  | 2.07801900  | -0.99719700 |
| C | 0.73482000  | 3.31917200  | 1.24015500  |
| H | -0.74133300 | 1.74729500  | 1.20348000  |
| C | 2.43653400  | 3.23083700  | -0.47456400 |
| H | 2.27772200  | 1.60556900  | -1.88496600 |
| C | 1.87975000  | 3.85675900  | 0.64567700  |
| H | 0.29215500  | 3.80487900  | 2.11412300  |
| H | 3.32808400  | 3.64814500  | -0.95041700 |
| H | 2.33472800  | 4.76456000  | 1.05075200  |

**KHCO<sub>3</sub>-KBr**

|    |             |             |             |
|----|-------------|-------------|-------------|
| H  | 2.83562500  | -0.86641200 | 1.61885000  |
| Br | -2.07282600 | 0.00722900  | 0.27085100  |
| K  | 0.15272900  | 2.10305700  | -0.39563800 |

|   |            |             |             |
|---|------------|-------------|-------------|
| C | 2.16399200 | 0.09909900  | 0.10796000  |
| O | 2.45739900 | -1.10511000 | 0.75771100  |
| O | 1.62191000 | -0.05767400 | -1.01336900 |
| K | 0.10248600 | -2.09704500 | -0.41846500 |
| O | 2.40572200 | 1.15085800  | 0.72085600  |

## 7. X-ray structural characterization of 3ar, 3au, 3bb, 3bc, 3bf, and 3bm

### 7.1 X-ray ellipsoid plots of 3ar (CCDC 2340956)

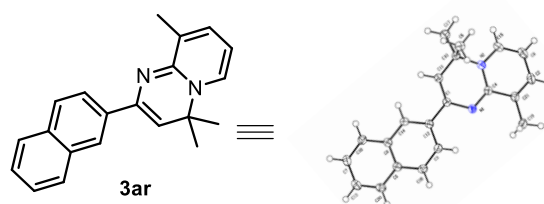

**Table S6 Crystal data and structure refinement for 3ar.**

| Identification code                   | <b>3ar</b>                                     |
|---------------------------------------|------------------------------------------------|
| Empirical formula                     | C <sub>21</sub> H <sub>20</sub> N <sub>2</sub> |
| Formula weight                        | 300.39                                         |
| Temperature/K                         | 150.00(11)                                     |
| Crystal system                        | orthorhombic                                   |
| Space group                           | P2 <sub>1</sub> 2 <sub>1</sub> 2 <sub>1</sub>  |
| a/Å                                   | 5.9659(2)                                      |
| b/Å                                   | 12.6239(5)                                     |
| c/Å                                   | 21.0785(8)                                     |
| α/°                                   | 90                                             |
| β/°                                   | 90                                             |
| γ/°                                   | 90                                             |
| Volume/Å <sup>3</sup>                 | 1587.48(10)                                    |
| Z                                     | 4                                              |
| ρ <sub>calc</sub> /mg/mm <sup>3</sup> | 1.257                                          |
| μ/mm <sup>-1</sup>                    | 0.074                                          |
| F(000)                                | 640.0                                          |
| Crystal size/mm <sup>3</sup>          | 0.15 × 0.13 × 0.12                             |
| 2θ range for data collection          | 3.76 to 61.18°                                 |
| Index ranges                          | -7 ≤ h ≤ 7, -15 ≤ k ≤ 15, -29 ≤ l ≤ 27         |
| Reflections collected                 | 12585                                          |
| Independent reflections               | 3833[R(int) = 0.0341]                          |

|                                                |                                  |
|------------------------------------------------|----------------------------------|
| Data/restraints/parameters                     | 3833/0/211                       |
| Goodness-of-fit on $F^2$                       | 1.045                            |
| Final R indexes [ $I \geq 2\sigma(I)$ ]        | $R_1 = 0.0376$ , $wR_2 = 0.0901$ |
| Final R indexes [all data]                     | $R_1 = 0.0459$ , $wR_2 = 0.0943$ |
| Largest diff. peak/hole / $e \text{ \AA}^{-3}$ | 0.19/-0.21                       |
| Flack parameter                                | -0.2(10)                         |

## 7.2 X-ray ellipsoid plots of 3au (CCDC 2340957)

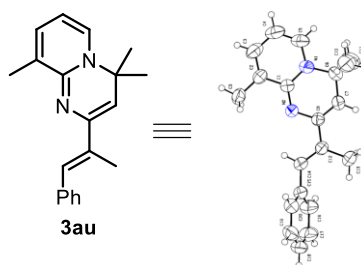

**Table S7 Crystal data and structure refinement for 3au.**

| Identification code                           | <b>3au</b>                                                        |
|-----------------------------------------------|-------------------------------------------------------------------|
| Empirical formula                             | $C_{20}H_{22}N_2$                                                 |
| Formula weight                                | 290.39                                                            |
| Temperature/K                                 | 303.64(10)                                                        |
| Crystal system                                | orthorhombic                                                      |
| Space group                                   | $P2_12_12_1$                                                      |
| $a/\text{\AA}$                                | 10.02211(19)                                                      |
| $b/\text{\AA}$                                | 10.3152(2)                                                        |
| $c/\text{\AA}$                                | 16.3908(3)                                                        |
| $\alpha/^\circ$                               | 90                                                                |
| $\beta/^\circ$                                | 90                                                                |
| $\gamma/^\circ$                               | 90                                                                |
| Volume/ $\text{\AA}^3$                        | 1694.48(6)                                                        |
| $Z$                                           | 4                                                                 |
| $\rho_{\text{calc}}/\text{cm}^3$              | 1.138                                                             |
| $\mu/\text{mm}^{-1}$                          | 0.510                                                             |
| $F(000)$                                      | 624.0                                                             |
| Crystal size/ $\text{mm}^3$                   | $0.21 \times 0.17 \times 0.15$                                    |
| Radiation                                     | $\text{Cu } K\alpha$ ( $\lambda = 1.54184$ )                      |
| $2\Theta$ range for data collection/ $^\circ$ | 10.132 to 151.466                                                 |
| Index ranges                                  | $-11 \leq h \leq 12$ , $-12 \leq k \leq 9$ , $-20 \leq l \leq 20$ |
| Reflections collected                         | 10954                                                             |
| Independent reflections                       | 3369 [ $R_{\text{int}} = 0.0281$ , $R_{\text{sigma}} = 0.0252$ ]  |
| Data/restraints/parameters                    | 3369/0/203                                                        |
| Goodness-of-fit on $F^2$                      | 1.059                                                             |

|                                                |                                  |
|------------------------------------------------|----------------------------------|
| Final R indexes [ $I \geq 2\sigma(I)$ ]        | $R_1 = 0.0427$ , $wR_2 = 0.1116$ |
| Final R indexes [all data]                     | $R_1 = 0.0444$ , $wR_2 = 0.1138$ |
| Largest diff. peak/hole / $e \text{ \AA}^{-3}$ | 0.14/-0.14                       |
| Flack parameter                                | 0.01(19)                         |

### 7.3 X-ray ellipsoid plots of 3bb (CCDC 2340961)

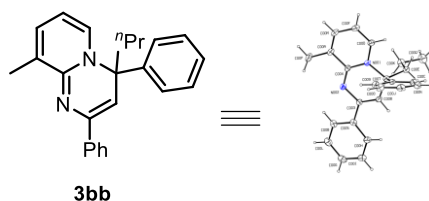

**Table S8 Crystal data and structure refinement for 3bb.**

| Identification code                            | <b>3bb</b>                                                        |
|------------------------------------------------|-------------------------------------------------------------------|
| Empirical formula                              | $C_{24}H_{24}N_2$                                                 |
| Formula weight                                 | 340.45                                                            |
| Temperature/K                                  | 300.77(10)                                                        |
| Crystal system                                 | orthorhombic                                                      |
| Space group                                    | $Pna2_1$                                                          |
| a/ $\text{\AA}$                                | 9.3172(3)                                                         |
| b/ $\text{\AA}$                                | 13.2929(4)                                                        |
| c/ $\text{\AA}$                                | 15.5466(6)                                                        |
| $\alpha/^\circ$                                | 90                                                                |
| $\beta/^\circ$                                 | 90                                                                |
| $\gamma/^\circ$                                | 90                                                                |
| Volume/ $\text{\AA}^3$                         | 1925.49(11)                                                       |
| Z                                              | 4                                                                 |
| $\rho_{\text{calc}}/\text{cm}^3$               | 1.174                                                             |
| $\mu/\text{mm}^{-1}$                           | 0.523                                                             |
| F(000)                                         | 728.0                                                             |
| Crystal size/ $\text{mm}^3$                    | $0.15 \times 0.14 \times 0.12$                                    |
| Radiation                                      | $\text{Cu K}\alpha$ ( $\lambda = 1.54184$ )                       |
| $2\Theta$ range for data collection/ $^\circ$  | 8.752 to 154.752                                                  |
| Index ranges                                   | $-9 \leq h \leq 11$ , $-16 \leq k \leq 13$ , $-17 \leq l \leq 19$ |
| Reflections collected                          | 7964                                                              |
| Independent reflections                        | 3184 [ $R_{\text{int}} = 0.0315$ , $R_{\text{sigma}} = 0.0352$ ]  |
| Data/restraints/parameters                     | 3184/1/237                                                        |
| Goodness-of-fit on $F^2$                       | 1.032                                                             |
| Final R indexes [ $I \geq 2\sigma(I)$ ]        | $R_1 = 0.0440$ , $wR_2 = 0.1208$                                  |
| Final R indexes [all data]                     | $R_1 = 0.0477$ , $wR_2 = 0.1241$                                  |
| Largest diff. peak/hole / $e \text{ \AA}^{-3}$ | 0.13/-0.13                                                        |
| Flack parameter                                | -0.2(6)                                                           |

#### 7.4 X-ray ellipsoid plots of 3bc (CCDC 2340961)

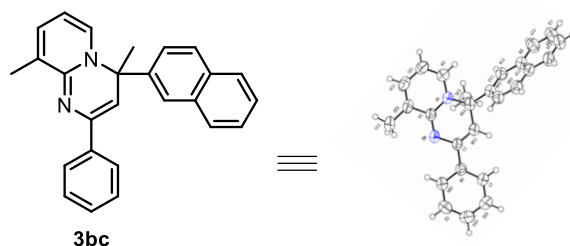

**Table S9 Crystal data and structure refinement for 3bc.**

|                                                              |                                                                              |
|--------------------------------------------------------------|------------------------------------------------------------------------------|
| Identification code                                          | <b>3bc</b>                                                                   |
| Empirical formula                                            | C <sub>26</sub> H <sub>22</sub> N <sub>2</sub>                               |
| Formula weight                                               | 362.45                                                                       |
| Temperature/K                                                | 302.03(10)                                                                   |
| Crystal system                                               | monoclinic                                                                   |
| Space group                                                  | <i>P</i> 2 <sub>1</sub> / <i>c</i>                                           |
| <i>a</i> /Å                                                  | 10.8920(3)                                                                   |
| <i>b</i> /Å                                                  | 20.1165(7)                                                                   |
| <i>c</i> /Å                                                  | 9.3605(3)                                                                    |
| $\alpha$ /°                                                  | 90                                                                           |
| $\beta$ /°                                                   | 104.195(3)                                                                   |
| $\gamma$ /°                                                  | 90                                                                           |
| Volume/Å <sup>3</sup>                                        | 1988.35(11)                                                                  |
| <i>Z</i>                                                     | 4                                                                            |
| $\rho_{\text{calc}}$ /cm <sup>3</sup>                        | 1.211                                                                        |
| $\mu$ /mm <sup>-1</sup>                                      | 0.543                                                                        |
| <i>F</i> (000)                                               | 768.0                                                                        |
| Crystal size/mm <sup>3</sup>                                 | 0.18 × 0.15 × 0.12                                                           |
| Radiation                                                    | Cu <i>K</i> $\alpha$ ( $\lambda$ = 1.54184)                                  |
| 2 $\theta$ range for data collection/°                       | 8.374 to 154.156                                                             |
| Index ranges                                                 | -13 ≤ <i>h</i> ≤ 13, -24 ≤ <i>k</i> ≤ 19, -11 ≤ <i>l</i> ≤ 11                |
| Reflections collected                                        | 13973                                                                        |
| Independent reflections                                      | 3970 [ <i>R</i> <sub>int</sub> = 0.0459, <i>R</i> <sub>sigma</sub> = 0.0459] |
| Data/restraints/parameters                                   | 3970/0/255                                                                   |
| Goodness-of-fit on <i>F</i> <sup>2</sup>                     | 1.072                                                                        |
| Final <i>R</i> indexes [ <i>I</i> ≥ 2 $\sigma$ ( <i>I</i> )] | <i>R</i> <sub>1</sub> = 0.0497, <i>wR</i> <sub>2</sub> = 0.1327              |
| Final <i>R</i> indexes [all data]                            | <i>R</i> <sub>1</sub> = 0.0687, <i>wR</i> <sub>2</sub> = 0.1529              |
| Largest diff. peak/hole / e Å <sup>-3</sup>                  | 0.17/-0.20                                                                   |

## 7.5 X-ray ellipsoid plots of 3bf (CCDC 2340955)

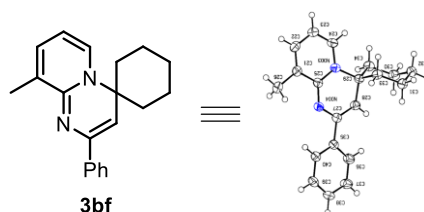

**Table S10 Crystal data and structure refinement for 3bf.**

|                                                     |                                                                         |
|-----------------------------------------------------|-------------------------------------------------------------------------|
| Identification code                                 | <b>3bf</b>                                                              |
| Empirical formula                                   | C <sub>20</sub> H <sub>22</sub> N <sub>2</sub>                          |
| Formula weight                                      | 290.39                                                                  |
| Temperature/K                                       | 149.99(10)                                                              |
| Crystal system                                      | monoclinic                                                              |
| Space group                                         | <i>P</i> 2 <sub>1</sub> / <i>c</i>                                      |
| <i>a</i> /Å                                         | 9.1803(2)                                                               |
| <i>b</i> /Å                                         | 12.0750(2)                                                              |
| <i>c</i> /Å                                         | 28.1968(4)                                                              |
| $\alpha$ /°                                         | 90                                                                      |
| $\beta$ /°                                          | 96.3230(10)                                                             |
| $\gamma$ /°                                         | 90                                                                      |
| Volume/Å <sup>3</sup>                               | 3106.66(10)                                                             |
| <i>Z</i>                                            | 8                                                                       |
| $\rho_{\text{calc}}$ /cm <sup>3</sup>               | 1.242                                                                   |
| $\mu$ /mm <sup>-1</sup>                             | 0.556                                                                   |
| <i>F</i> (000)                                      | 1248.0                                                                  |
| Crystal size/mm <sup>3</sup>                        | 0.15 × 0.13 × 0.07                                                      |
| Radiation                                           | Cu <i>K</i> α ( $\lambda$ = 1.54184)                                    |
| 2 $\theta$ range for data collection/°              | 6.308 to 153.226                                                        |
| Index ranges                                        | -9 ≤ <i>h</i> ≤ 11, -15 ≤ <i>k</i> ≤ 15, -35 ≤ <i>l</i> ≤ 35            |
| Reflections collected                               | 6789                                                                    |
| Independent reflections                             | 6789 [ <i>R</i> <sub>int</sub> = ?, <i>R</i> <sub>sigma</sub> = 0.0191] |
| Data/restraints/parameters                          | 6789/0/400                                                              |
| Goodness-of-fit on <i>F</i> <sup>2</sup>            | 1.079                                                                   |
| Final <i>R</i> indexes [ <i>I</i> ≥ 2σ( <i>I</i> )] | <i>R</i> <sub>1</sub> = 0.0647, <i>wR</i> <sub>2</sub> = 0.1855         |
| Final <i>R</i> indexes [all data]                   | <i>R</i> <sub>1</sub> = 0.0696, <i>wR</i> <sub>2</sub> = 0.1892         |
| Largest diff. peak/hole / e Å <sup>-3</sup>         | 0.34/-0.28                                                              |

## 7.6 X-ray ellipsoid plots of 3bm (CCDC 2340960)

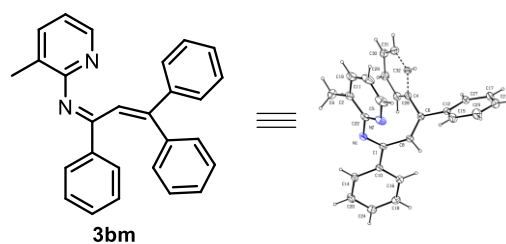

**Table S11 Crystal data and structure refinement for 3bm.**

|                                                      |                                                                              |
|------------------------------------------------------|------------------------------------------------------------------------------|
| Identification code                                  | <b>3bm</b>                                                                   |
| Empirical formula                                    | C <sub>27</sub> H <sub>22</sub> N <sub>2</sub>                               |
| Formula weight                                       | 374.46                                                                       |
| Temperature/K                                        | 301.84(10)                                                                   |
| Crystal system                                       | triclinic                                                                    |
| Space group                                          | <i>P</i> -1                                                                  |
| <i>a</i> /Å                                          | 9.0020(2)                                                                    |
| <i>b</i> /Å                                          | 10.8545(2)                                                                   |
| <i>c</i> /Å                                          | 12.0854(2)                                                                   |
| $\alpha$ /°                                          | 109.707(2)                                                                   |
| $\beta$ /°                                           | 101.745(2)                                                                   |
| $\gamma$ /°                                          | 98.816(2)                                                                    |
| Volume/Å <sup>3</sup>                                | 1056.43(4)                                                                   |
| <i>Z</i>                                             | 2                                                                            |
| $\rho_{\text{calc}}$ /cm <sup>3</sup>                | 1.177                                                                        |
| $\mu$ /mm <sup>-1</sup>                              | 0.528                                                                        |
| <i>F</i> (000)                                       | 396.0                                                                        |
| Crystal size/mm <sup>3</sup>                         | 0.17 × 0.14 × 0.12                                                           |
| Radiation                                            | Cu <i>K</i> α ( $\lambda$ = 1.54184)                                         |
| 2 $\theta$ range for data collection/°               | 8.082 to 152.07                                                              |
| Index ranges                                         | -11 ≤ <i>h</i> ≤ 11, -13 ≤ <i>k</i> ≤ 13, -15 ≤ <i>l</i> ≤ 14                |
| Reflections collected                                | 11830                                                                        |
| Independent reflections                              | 4181 [ <i>R</i> <sub>int</sub> = 0.0256, <i>R</i> <sub>sigma</sub> = 0.0271] |
| Data/restraints/parameters                           | 4181/60/308                                                                  |
| Goodness-of-fit on <i>F</i> <sup>2</sup>             | 1.072                                                                        |
| Final <i>R</i> indexes [ <i>I</i> ≥ 2σ ( <i>I</i> )] | <i>R</i> <sub>1</sub> = 0.0461, <i>wR</i> <sub>2</sub> = 0.1288              |
| Final <i>R</i> indexes [all data]                    | <i>R</i> <sub>1</sub> = 0.0543, <i>wR</i> <sub>2</sub> = 0.1368              |
| Largest diff. peak/hole / e Å <sup>-3</sup>          | 0.11/-0.14                                                                   |

## 8. References

- (1) H. Wu, X. Qin, A. M. P. Moeljadi, H. Hirao and J. S. Zhou, *Angew. Chem. Int. Ed.*, 2019, **58**, 2705–2709.
- (2) J. Yang, Y. W. Seto and N. Yoshikai, *ACS Catal.*, 2015, **5**, 3054–3057.
- (3) M. C. Willis and S. Sapmaz, *Chem. Commun.*, 2001, **24**, 2558–2559.
- (4) I. Iovel, L. Golomba, J. Popelis, S. Grinberga, S. Belyakov and E. Lukevics, *Chem. Heterocycl. Comp.*, 2002, **38**, 1210–1229.
- (5) C. Wang, C. Wu and S. Ge, *ACS Catal.*, 2016, **6**, 7585–7589.
- (6) J. J. Molloy, J. B. Metternich, C. G. Daniliuc, A. J. B. Watson and R. Gilmour, *Angew. Chem. Int. Ed.*, 2018, **57**, 3168–3172.
- (7) R. Iakovenko and J. Hlaváč, *Green Chem.*, 2021, **23**, 440–446.
- (8) M.-Y. Chen, S. Charvet, P.-A. Payard, M.-E. L. Perrin and J. C. Vantourout, *Angew. Chem. Int. Ed.*, 2024, **63**, e202311165.
- (9) H. Cai, Y.-Q. Tu, K. Lu, Q.-L. Chen, F.-M. Zhang, X.-M. Zhang, Y.-J. Pan and Z.-B. Yan, *Sci. China Chem.*, 2023, **66**, 2791–2796.
- (10) Y.-J. Ping, Y.-M. Zhou, L.-L. Wu, Z.-R. Li, X. Gu, X.-L. Wan, Z.-J. Xu and C.-M. Che, *Org. Chem. Front.*, 2021, **8**, 1910–1917.
- (11) Frisch, M. J.; Trucks, G. W.; Schlegel, H. B.; Scuseria, G. E.; Robb, M. A.; Cheeseman, J. R.; Scalmani, G.; Barone, V.; Mennucci, B.; Petersson, G. A.; Nakatsuji, H.; Caricato, M.; Li, X.; Hratchian, H. P.; Izmaylov, A. F.; Bloino, J.; Zheng, G.; Sonnenberg, J. L.; Hada, M.; Ehara, M.; Toyota, K.; Fukuda, R.; Hasegawa, J.; Ishida, M.; T. Nakajima; Honda, Y.; Kitao, O.; Nakai, H.; Vreven, T.; J. A. Montgomery, J.; Peralta, J. E.; Ogliaro, F.; Bearpark, M.; Heyd, J. J.; Brothers, E.; Kudin, K. N.; Staroverov, V. N.; Keith, T.; Kobayashi, R.; Normand, J.; Raghavachari, K.; Rendell, A.; Burant, J. C.; Iyengar, S. S.; Tomasi, J.; Cossi, M.; Rega, N.; Millam, J. M.; Klene, M.; Knox, J. E.; Cross, J. B.; Bakken, V.; Adamo, C.; Jaramillo, J.; Gomperts, R.; Stratmann, R. E.; Yazyev, O.; Austin, A. J.; Cammi, R.; Pomelli, C.; Ochterski, J. W.; Martin, R. L.; Morokuma, K.; Zakrzewski, V. G.; Voth, G. A.; Salvador, P.; Dannenberg, J. J.; Dapprich, S.; Daniels, A. D.; Farkas, O.; Foresman, J. B.; Ortiz, J. V.; Cioslowski, J.; Fox, D. J. *Gaussian 09*, Revision D.01; Gaussian, Inc.: Wallingford, CT, 2013.
- (12) (a) C. Lee, W. Yang and R. G. Parr, *Matter Mater.* 1988, **37**, 785–789. (b) B. Miehlich, A. Savin, H. Stoll and H. Preuss, *Chem. Phys. Lett.* 1989, **157**, 200–206. (c) A. D. Becke, *J. Chem. Phys.* 1993, **98**, 5648–5652.
- (13) (a) S. Grimme, J. Antony, S. Ehrlich, H. Krieg, *J. Chem. Phys.*, 2010, **132**, 154104. (b) S. Grimme, S. Ehrlich and L. Goerigk, *J. Comput. Chem.*, 2011, **32**, 1456–1465.
- (14) O. Treutler, R. Ahlrichs, *J Chem Phys.*, 1995, **102**, 346–354.
- (15) F. Weigend and R. Ahlrichs, *Physical Chemistry Chemical Physics.*, 2005, **7**, 3297–3305.
- (16) A. Armstrong, R. A. Boto, P. Dingwall, J. Contreras-Garcia, M. J. Harvey, N. J. Mason and H. S. Rzepa, *Chem. Sci.*, 2014, **5**, 2057–2071.
- (17) A. V. Marenich, C. J. Cramer and D. G. Truhlar, *J. Phys. Chem. B*, 2009, **113**, 4538–4543.

## 9. Copies of NMR spectra



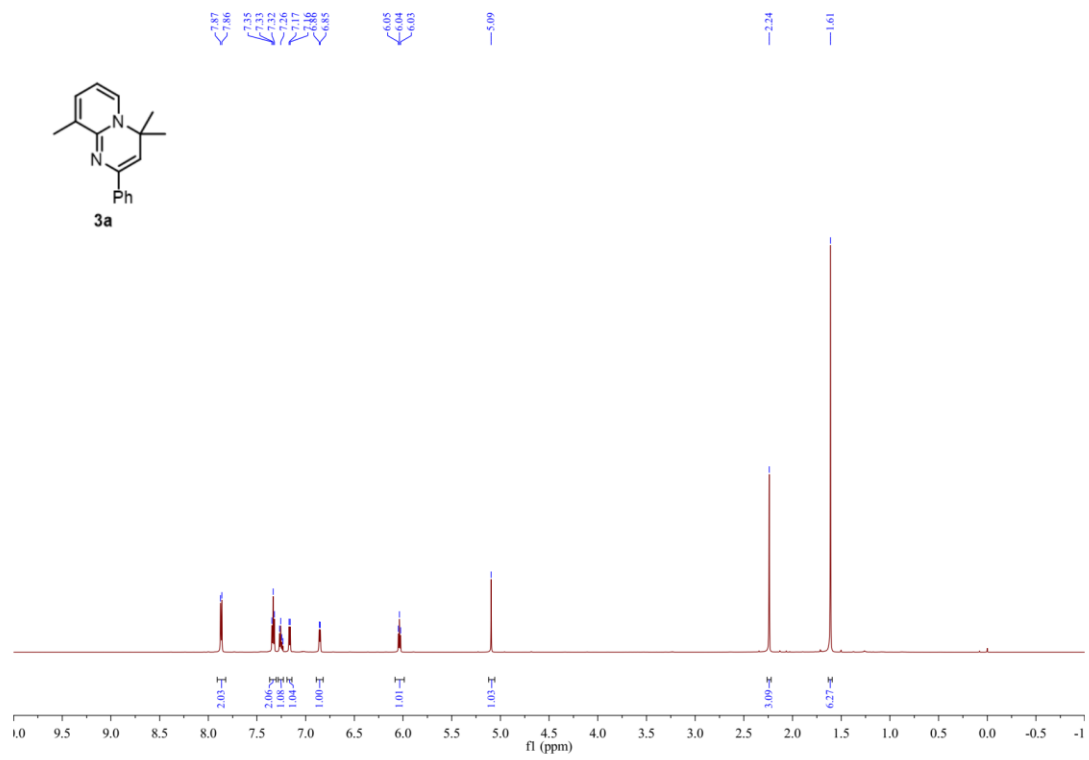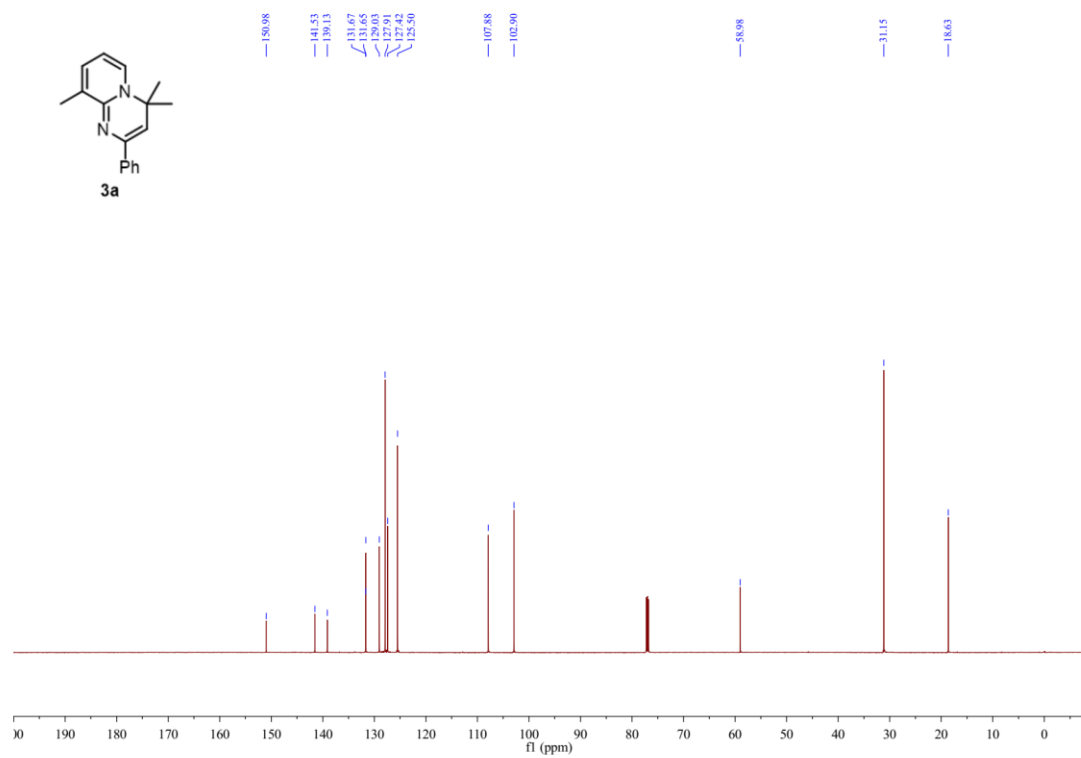

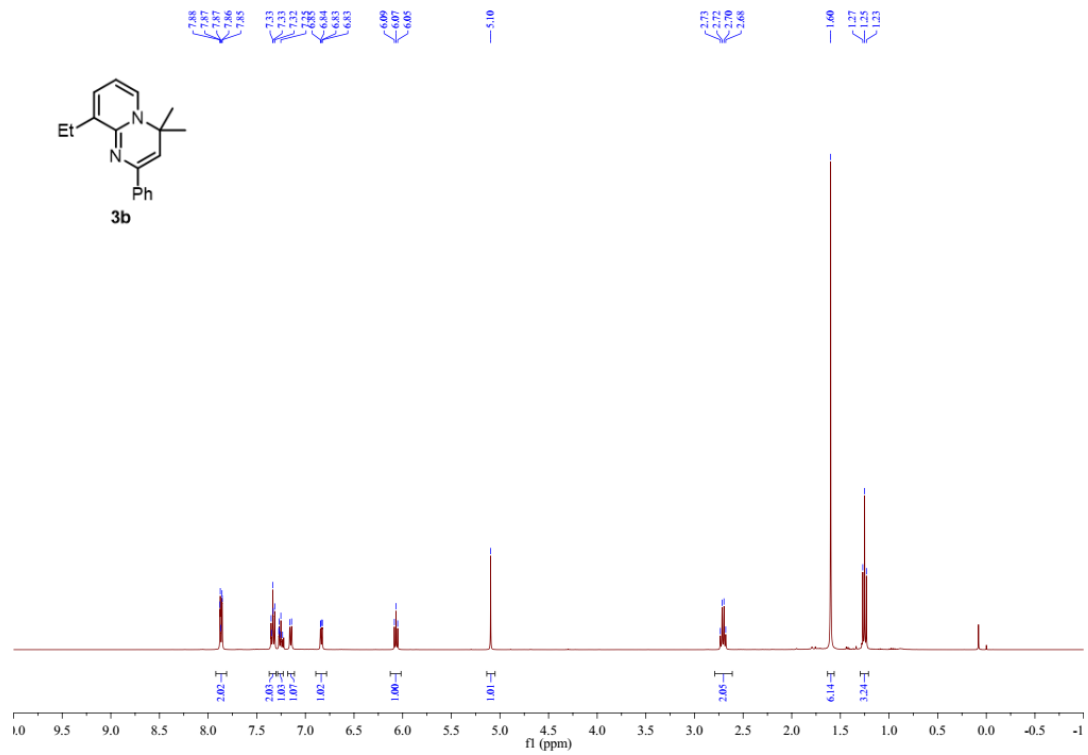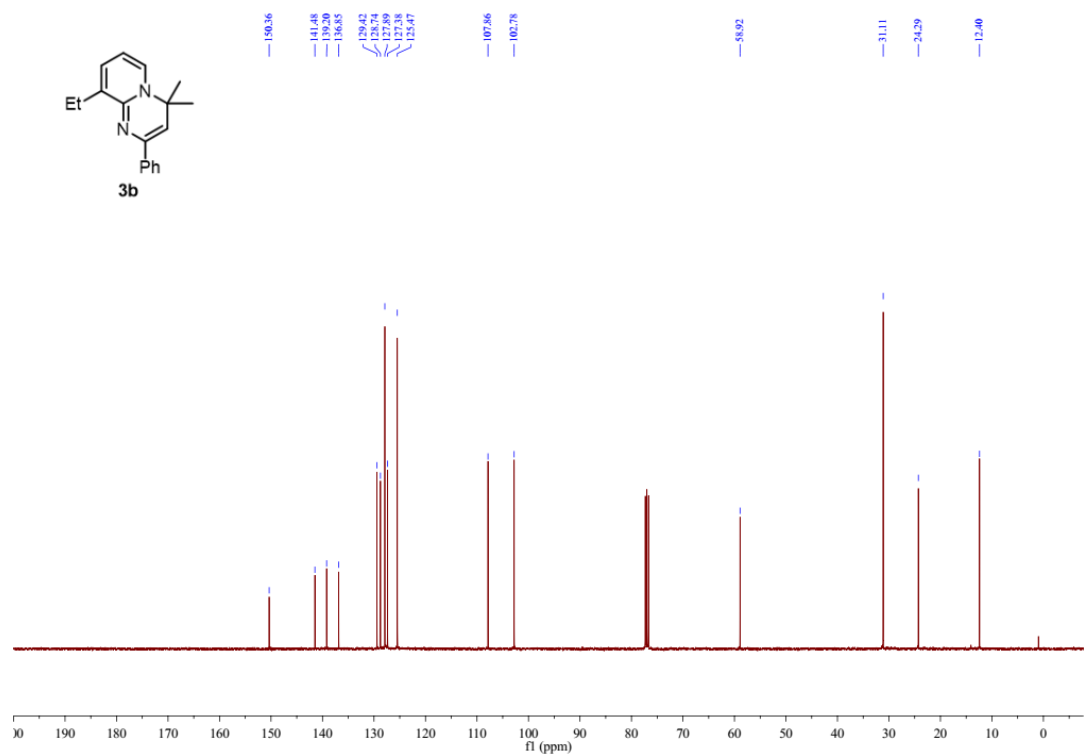

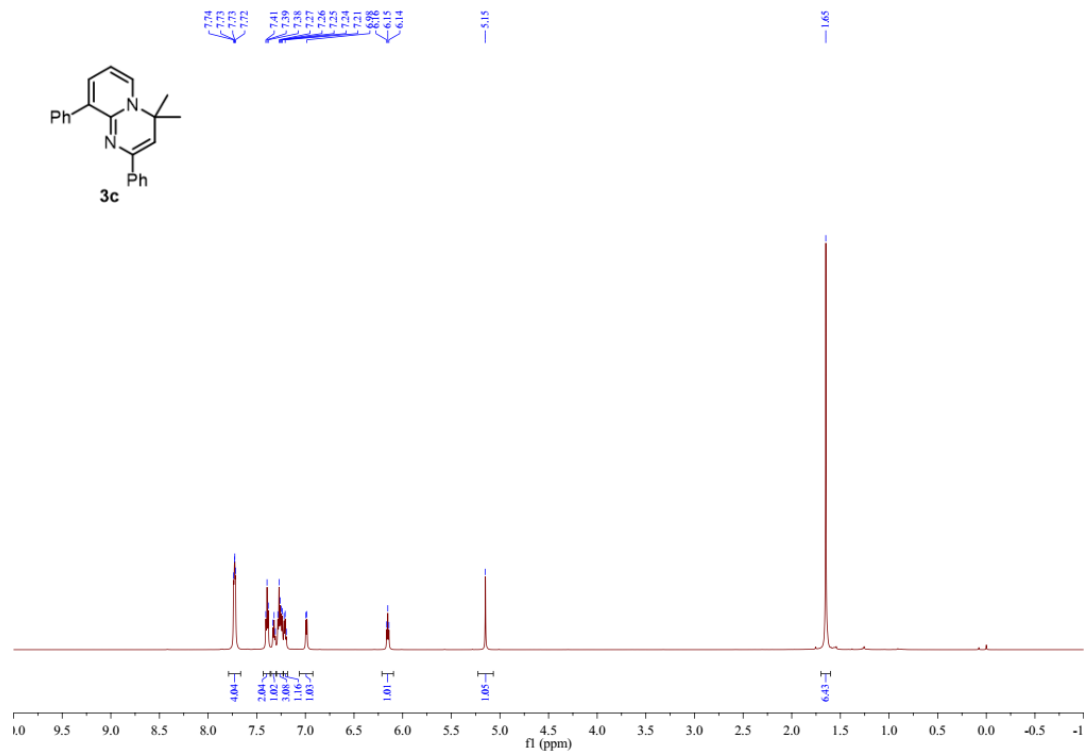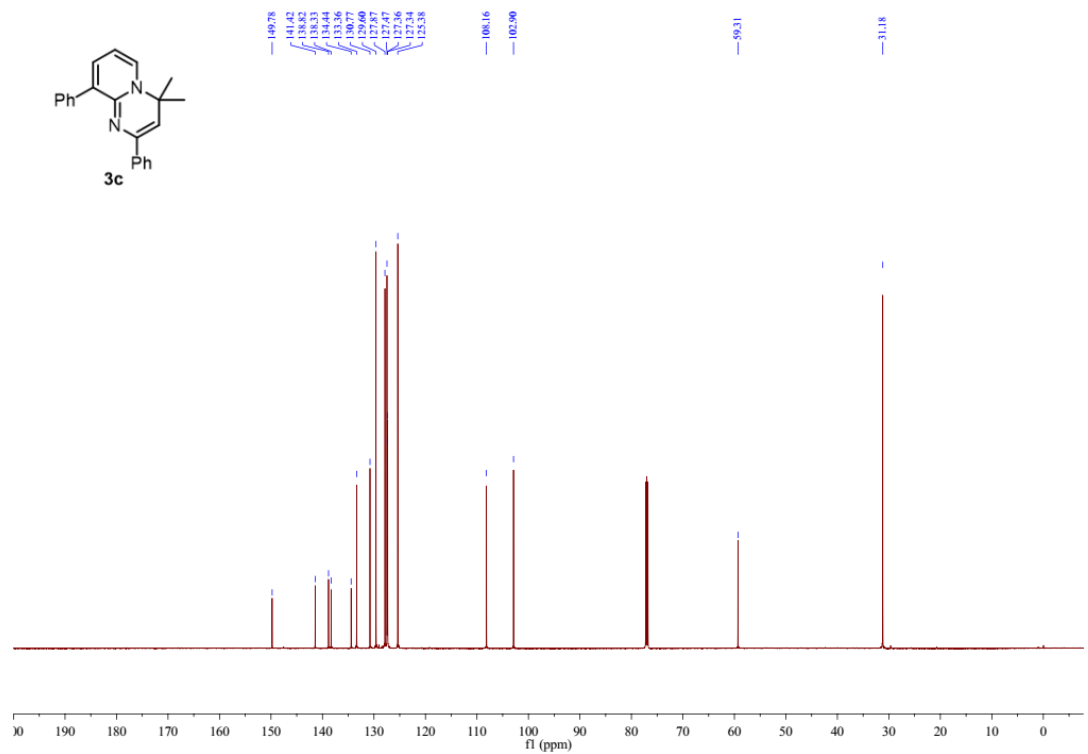

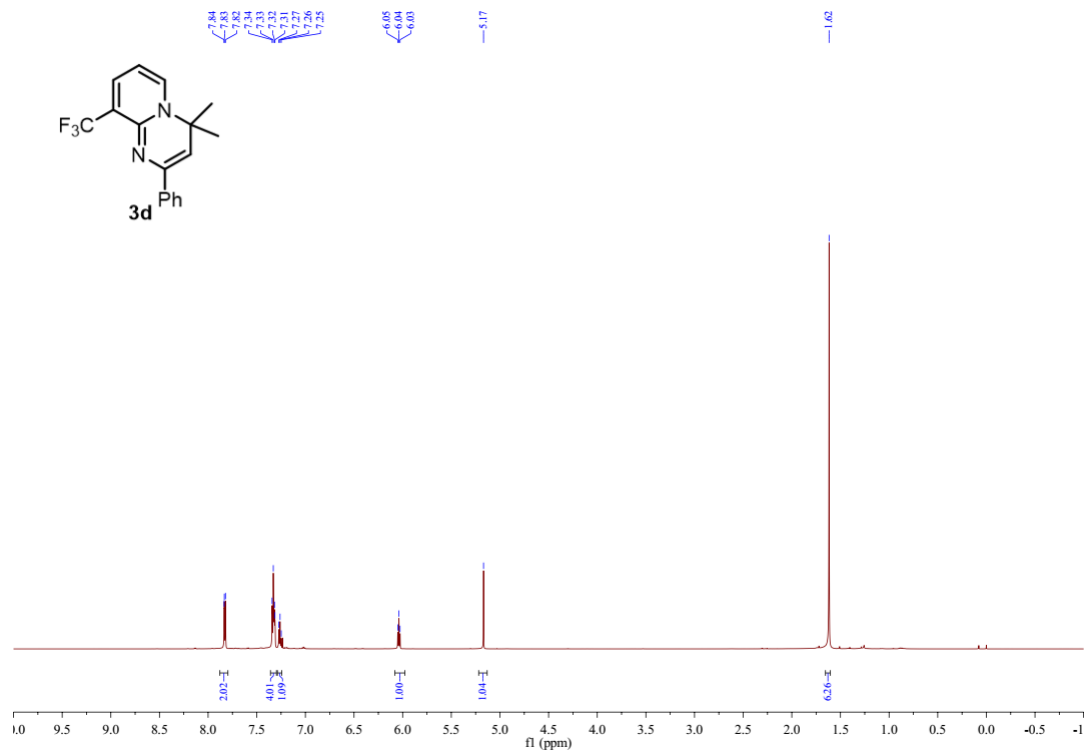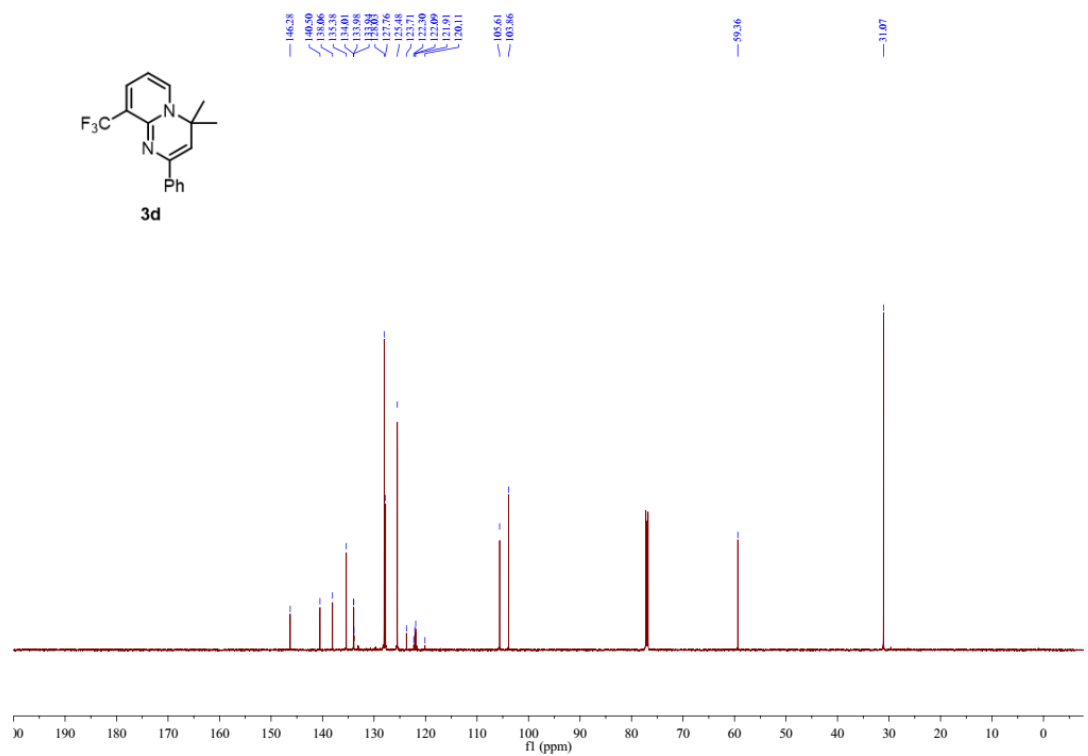

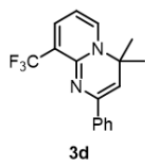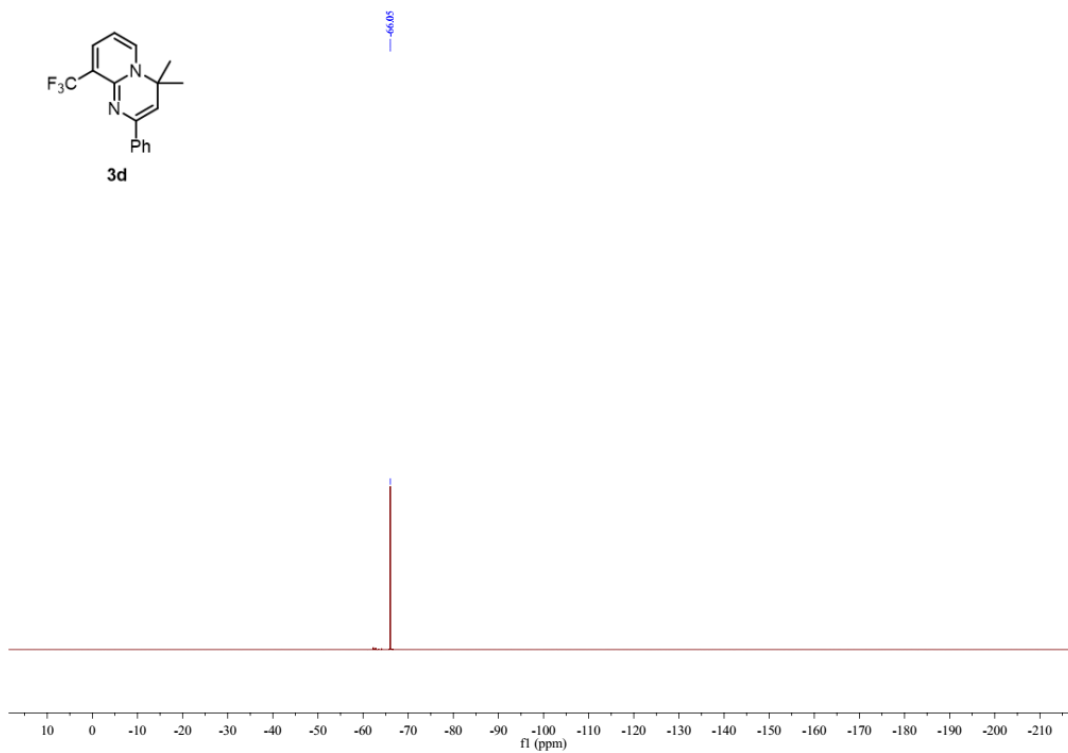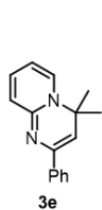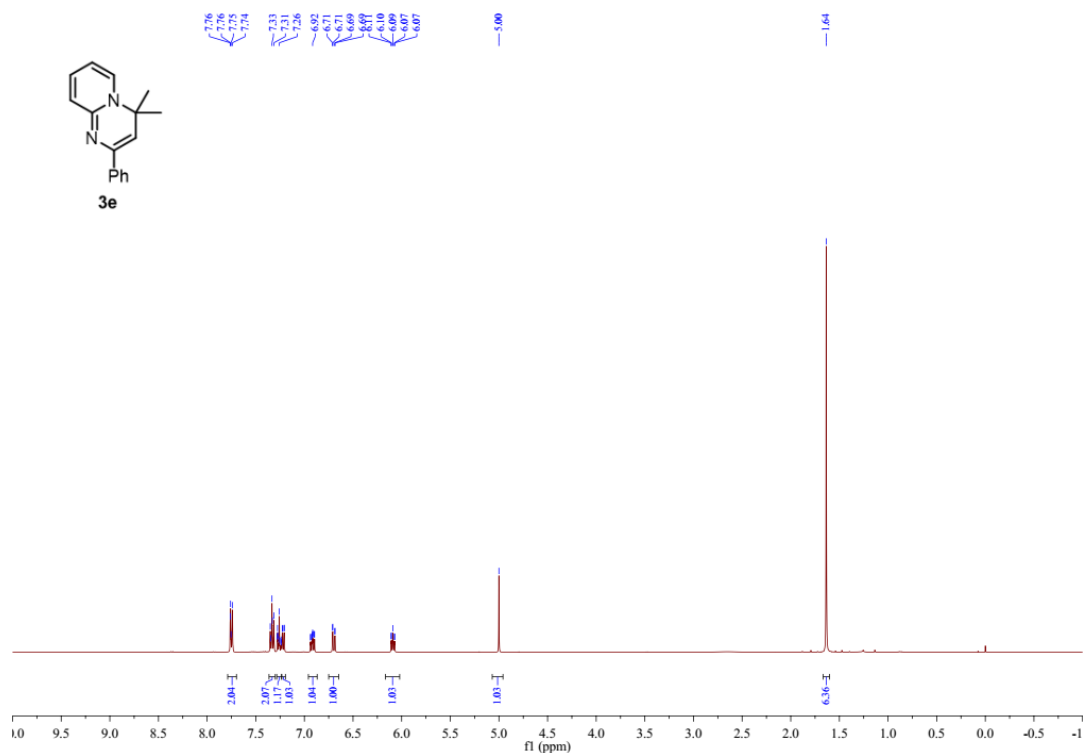

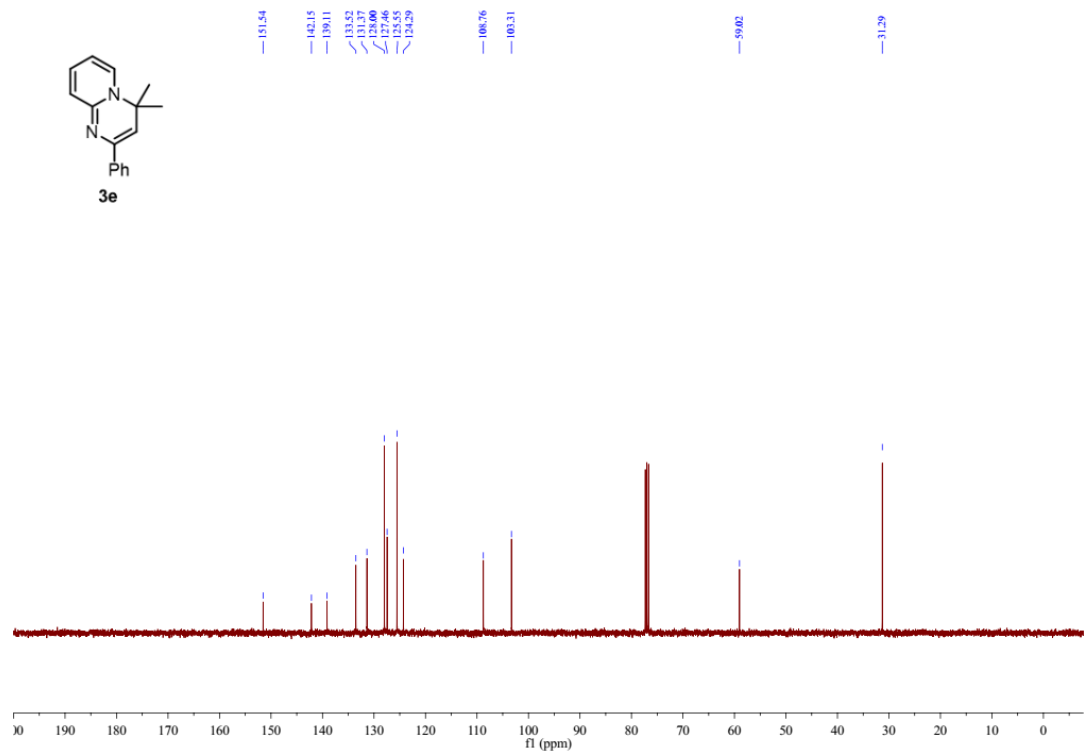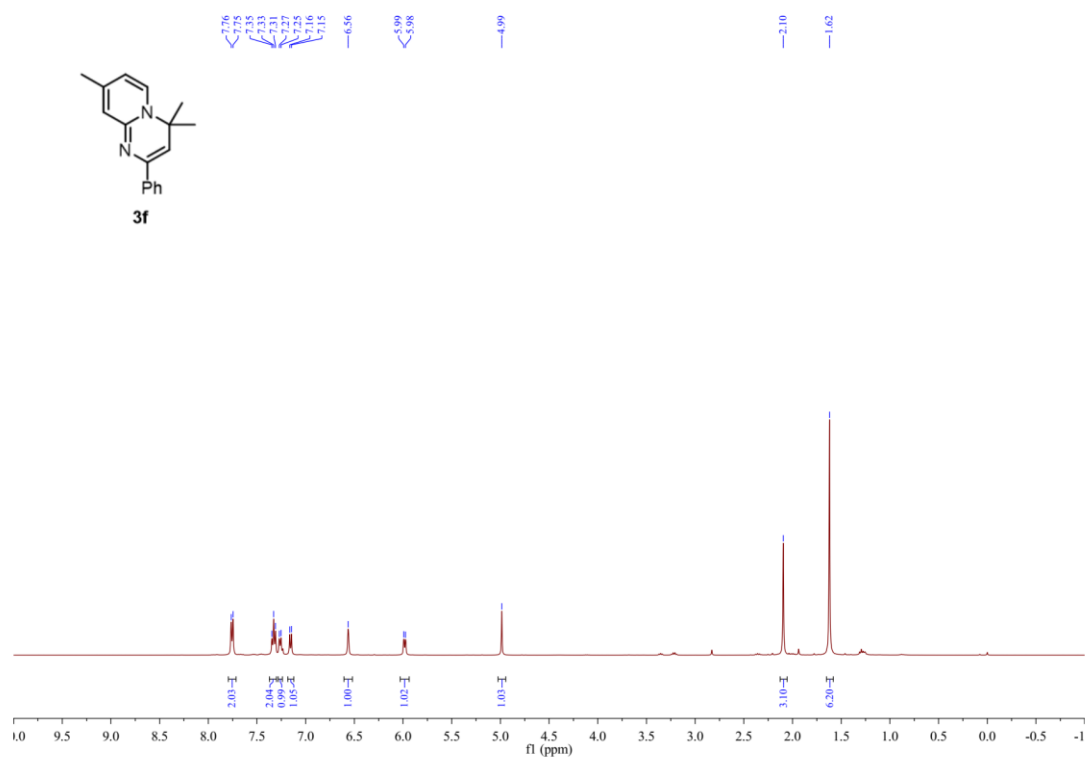

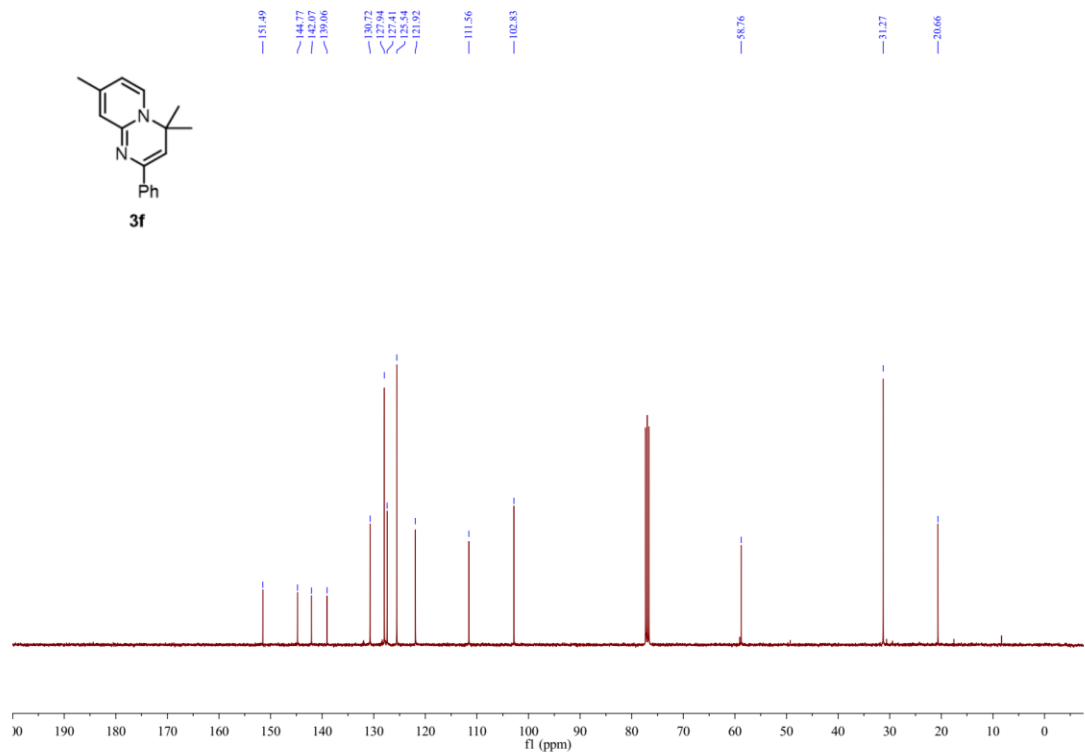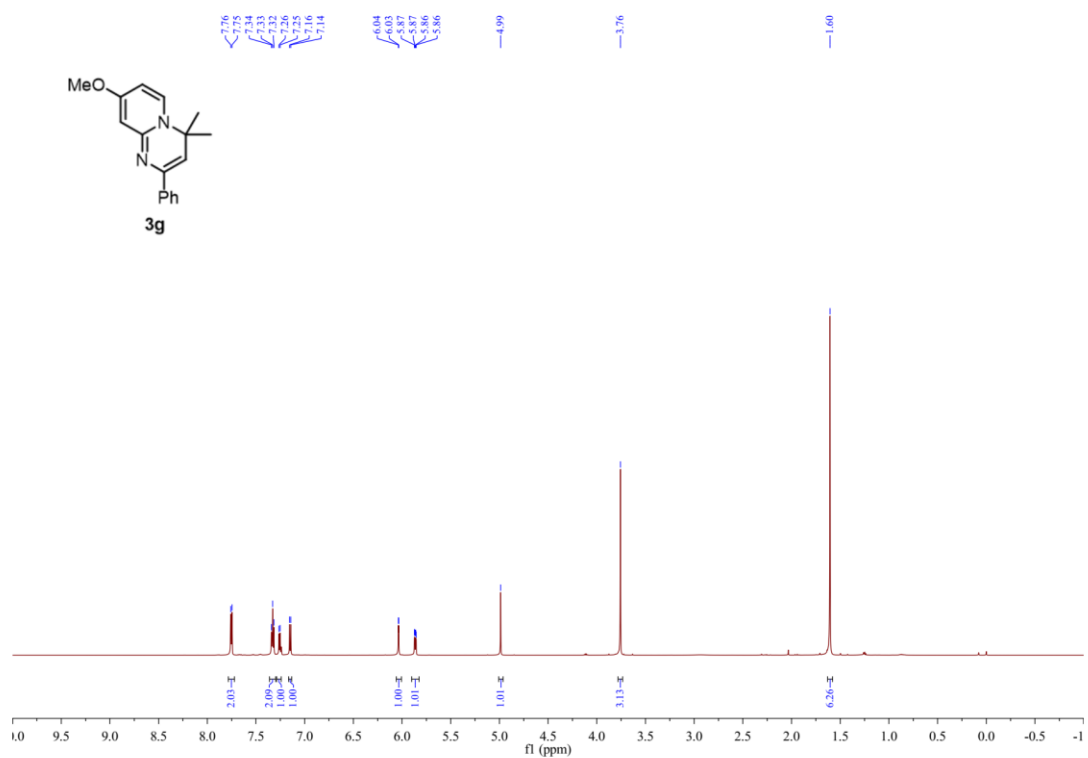

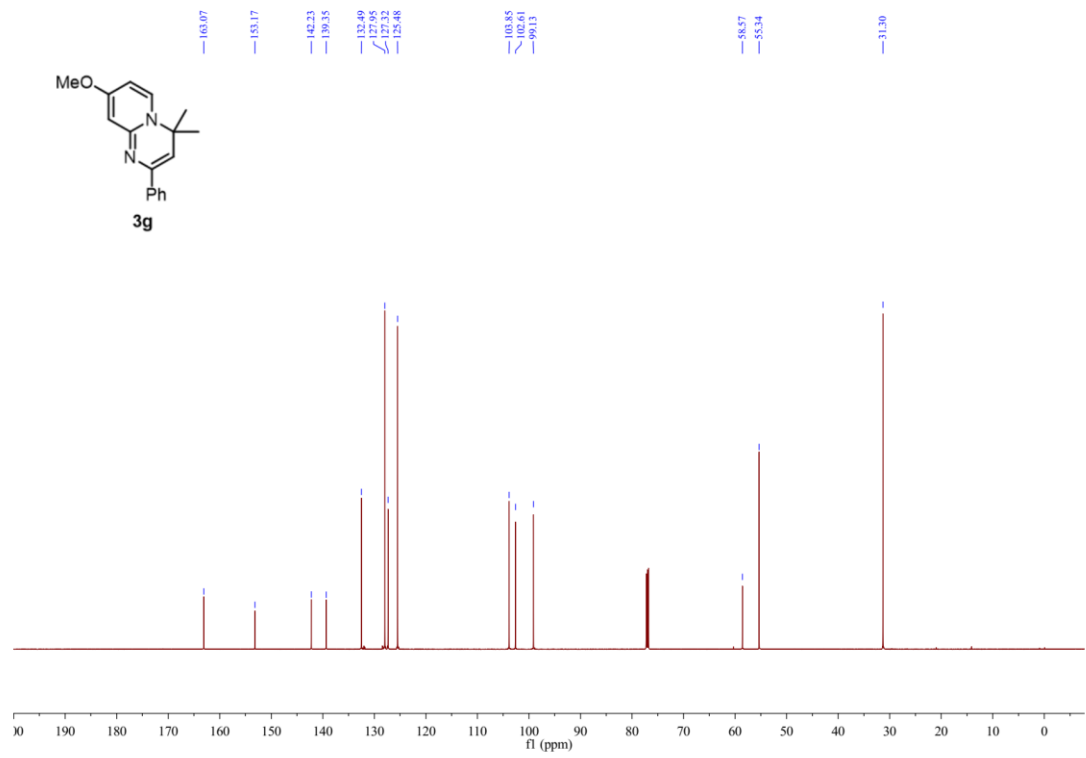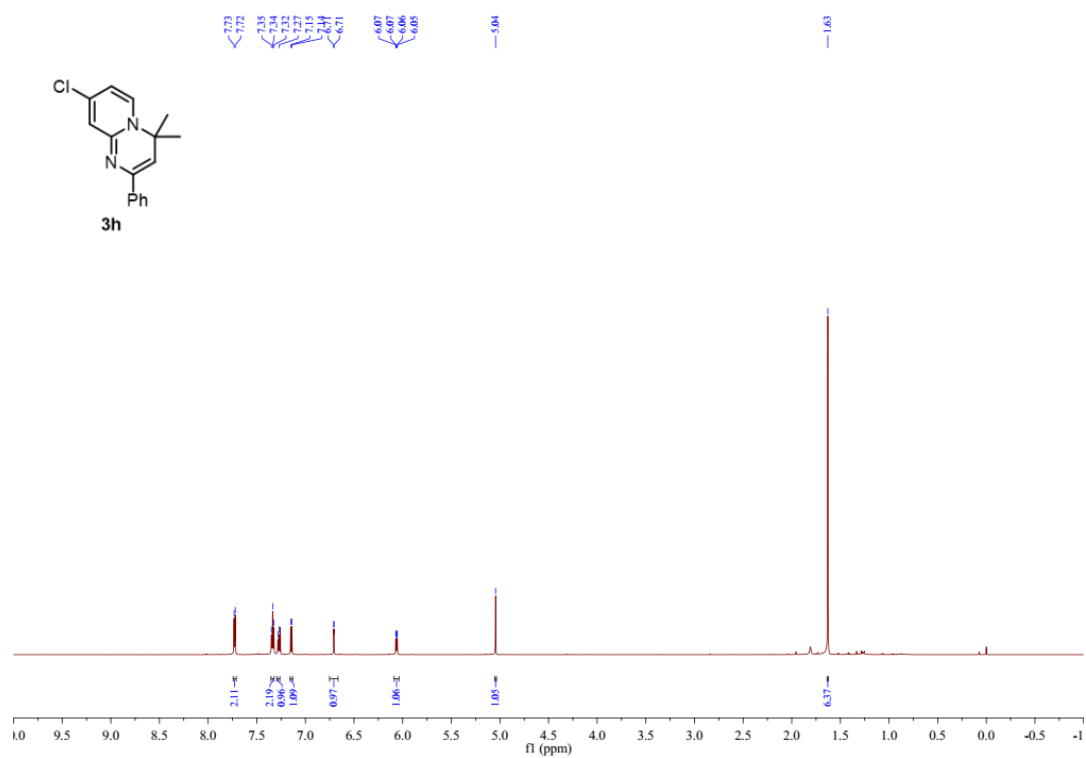



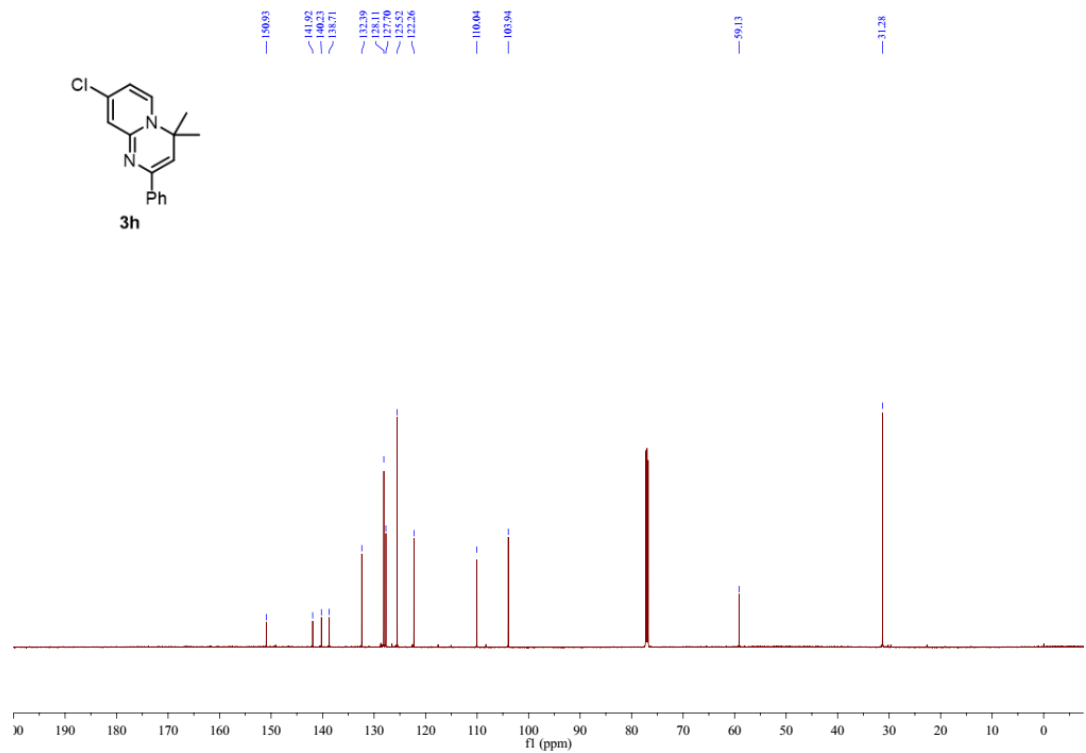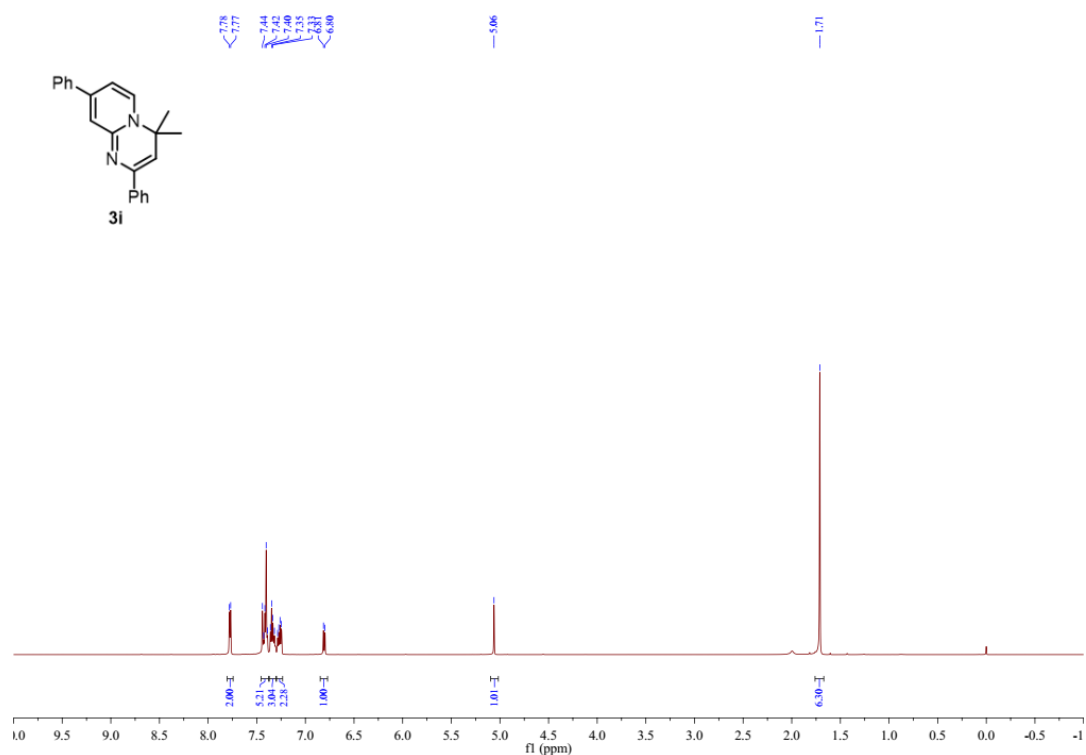

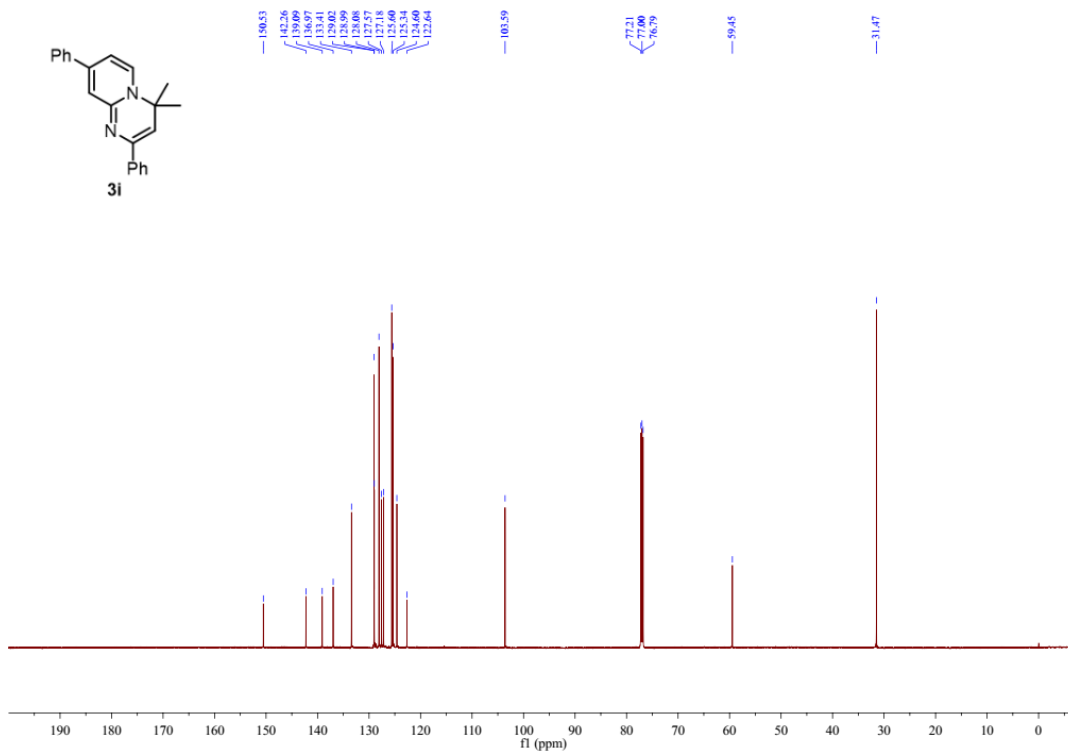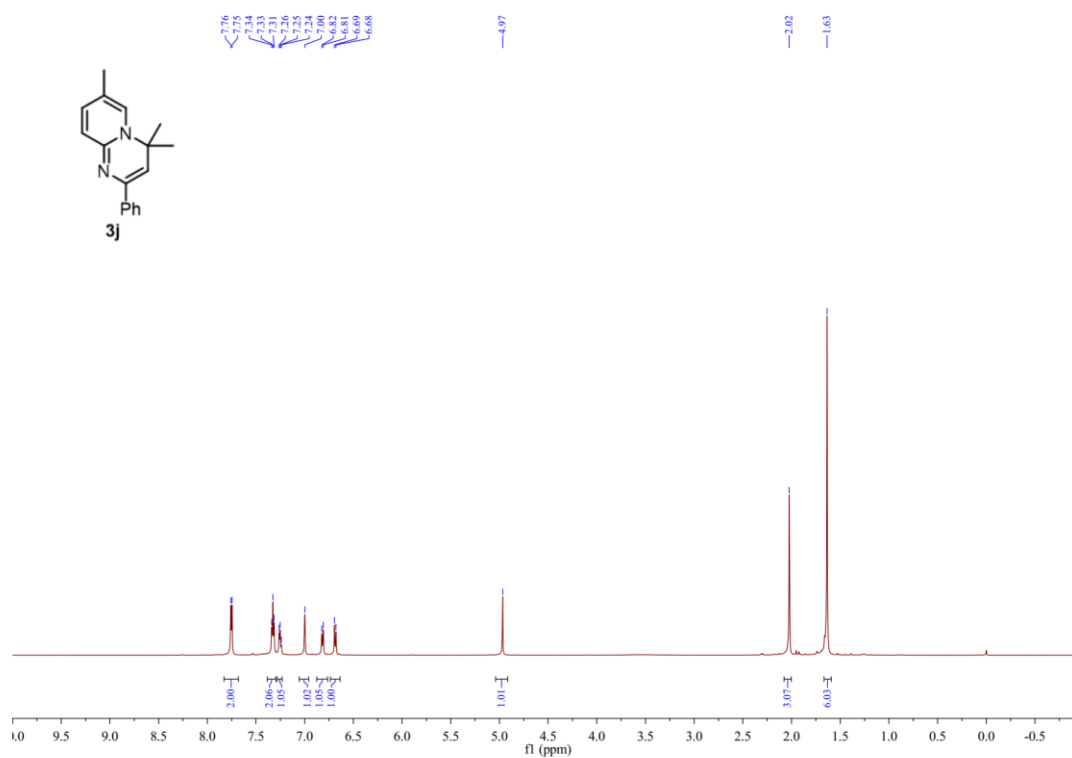

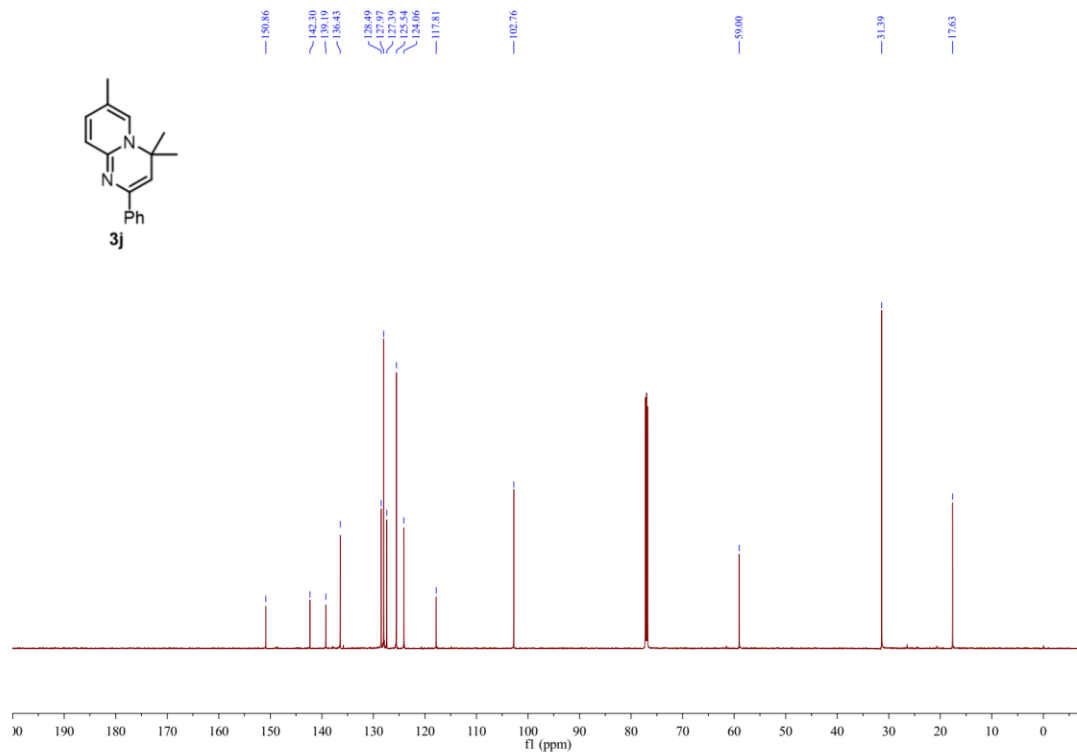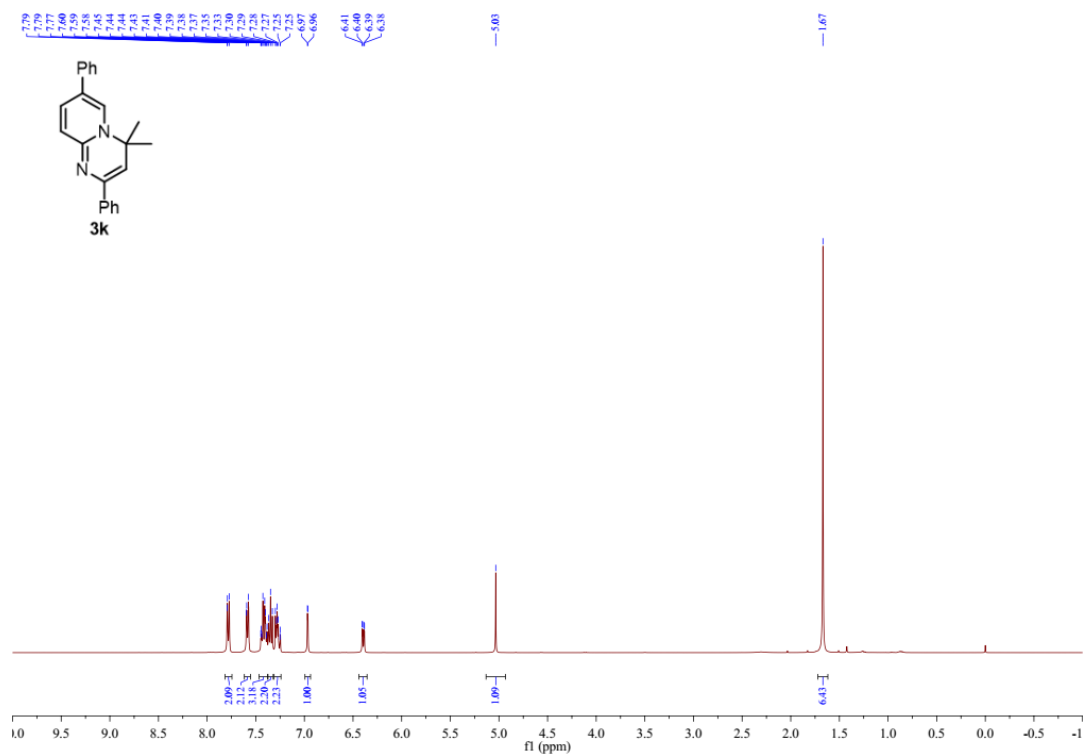

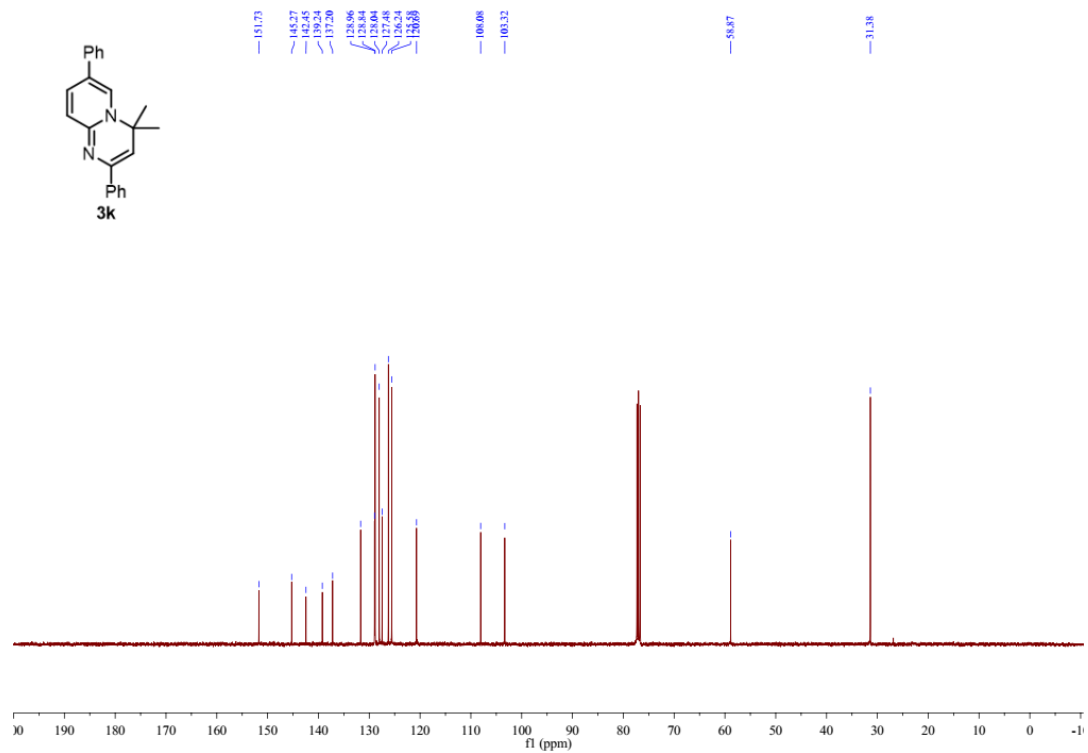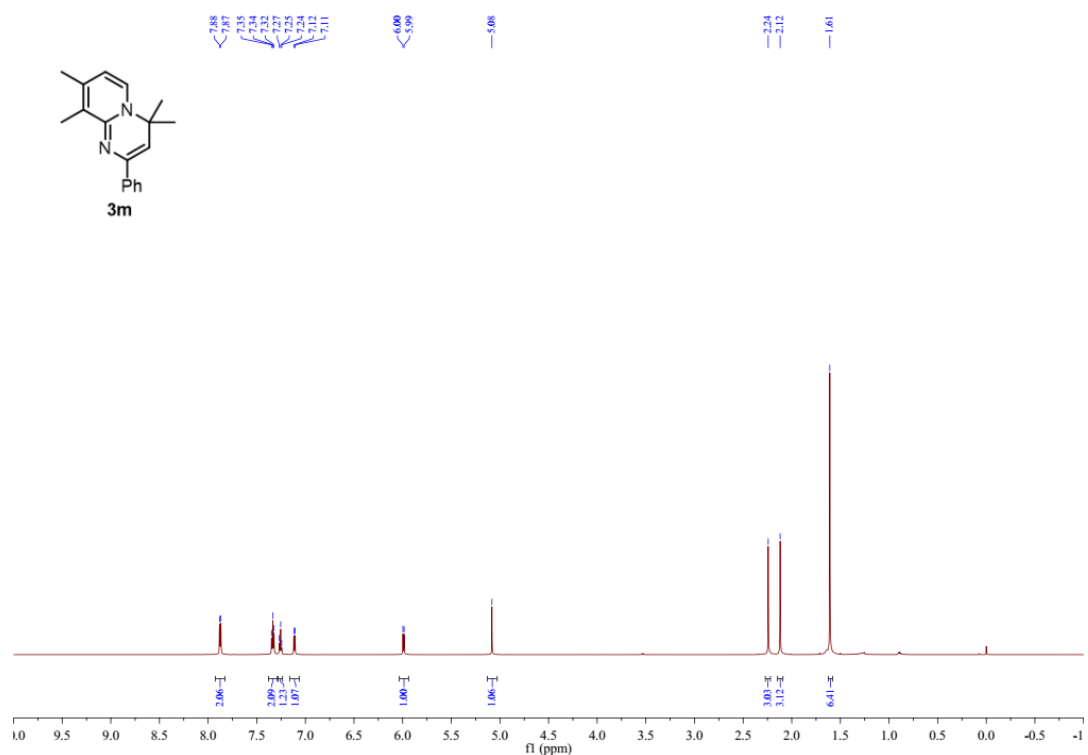

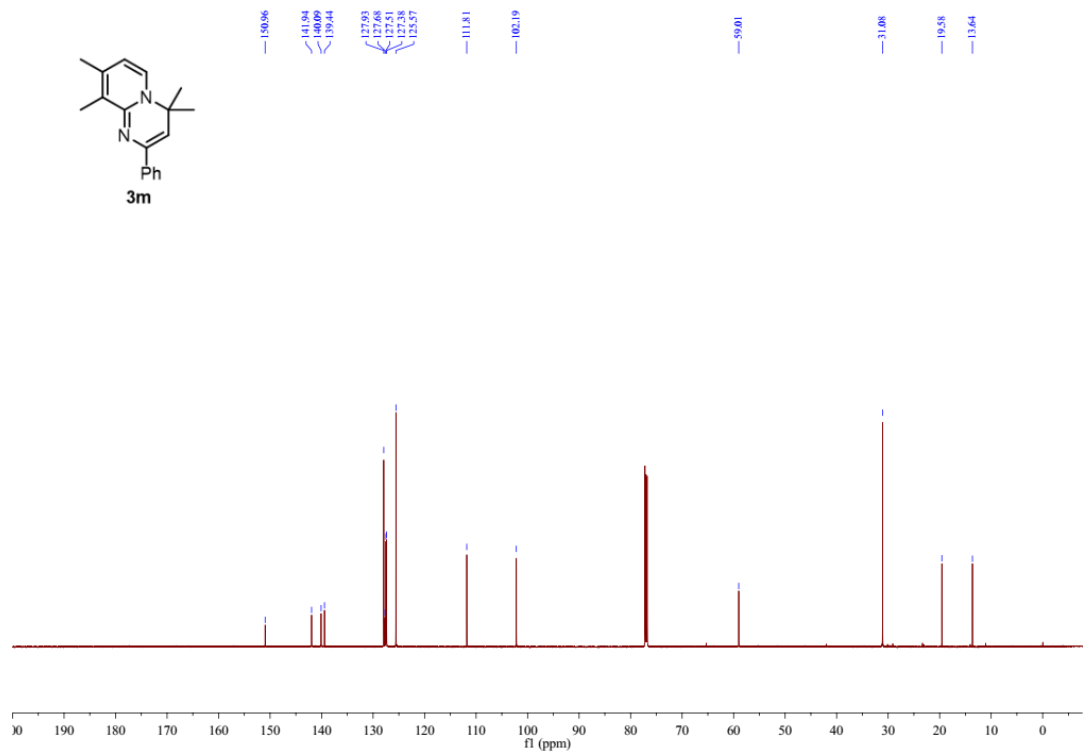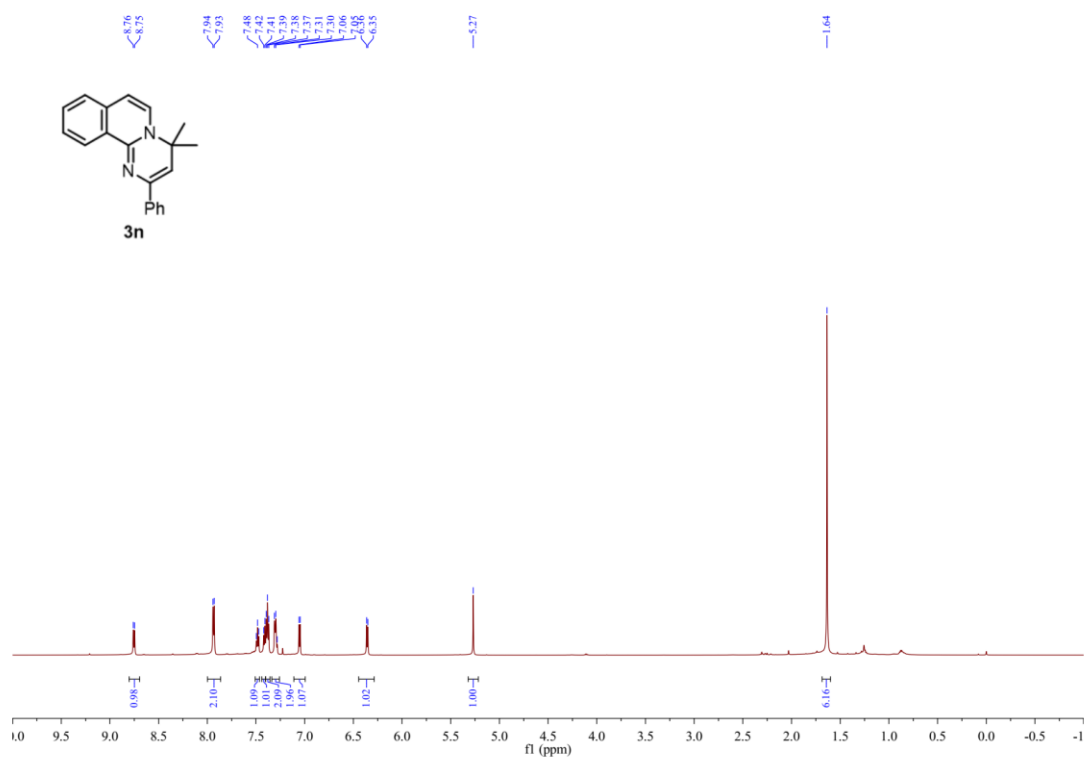



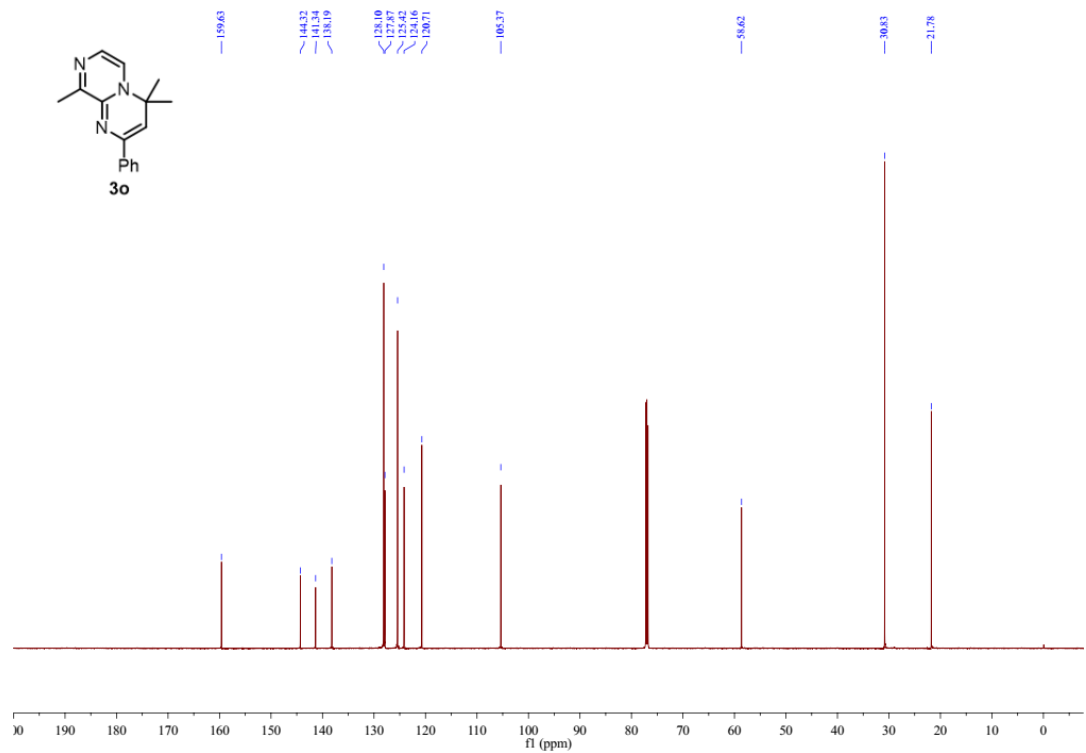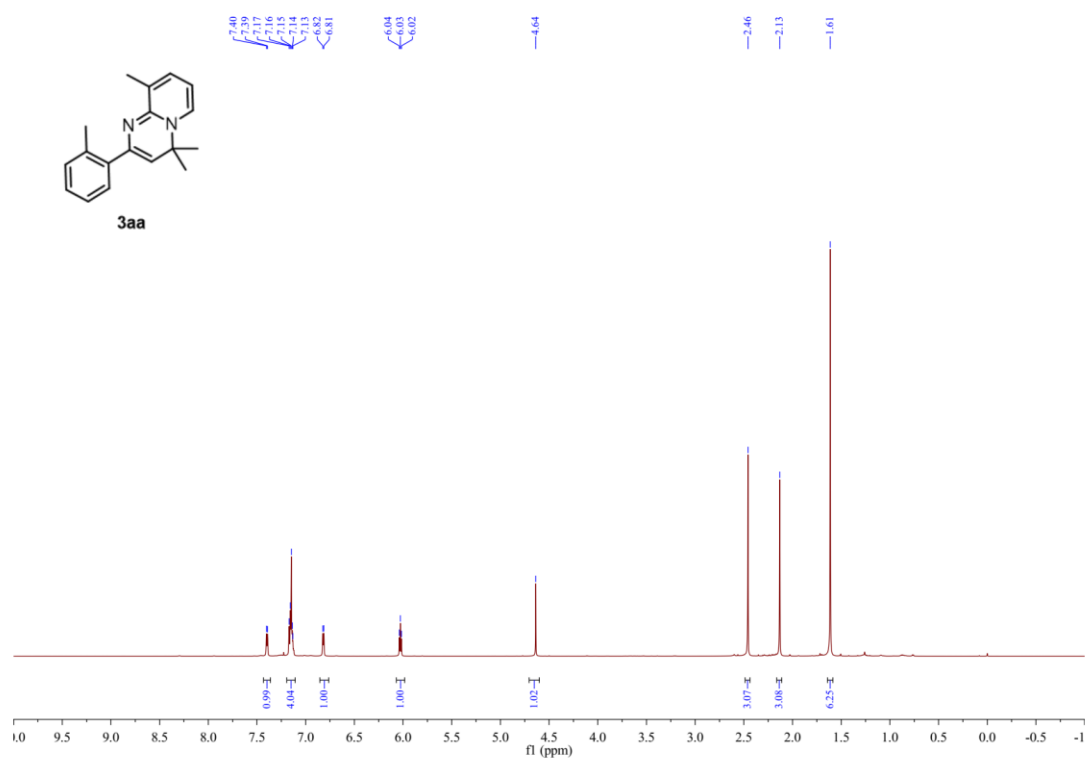

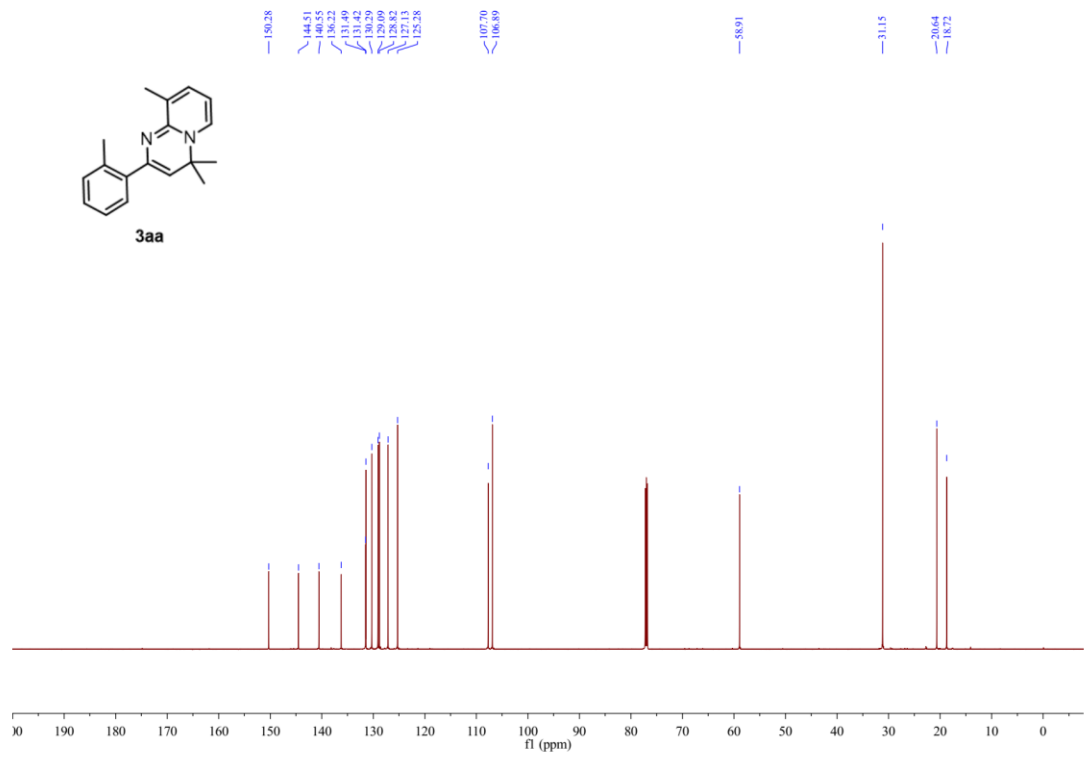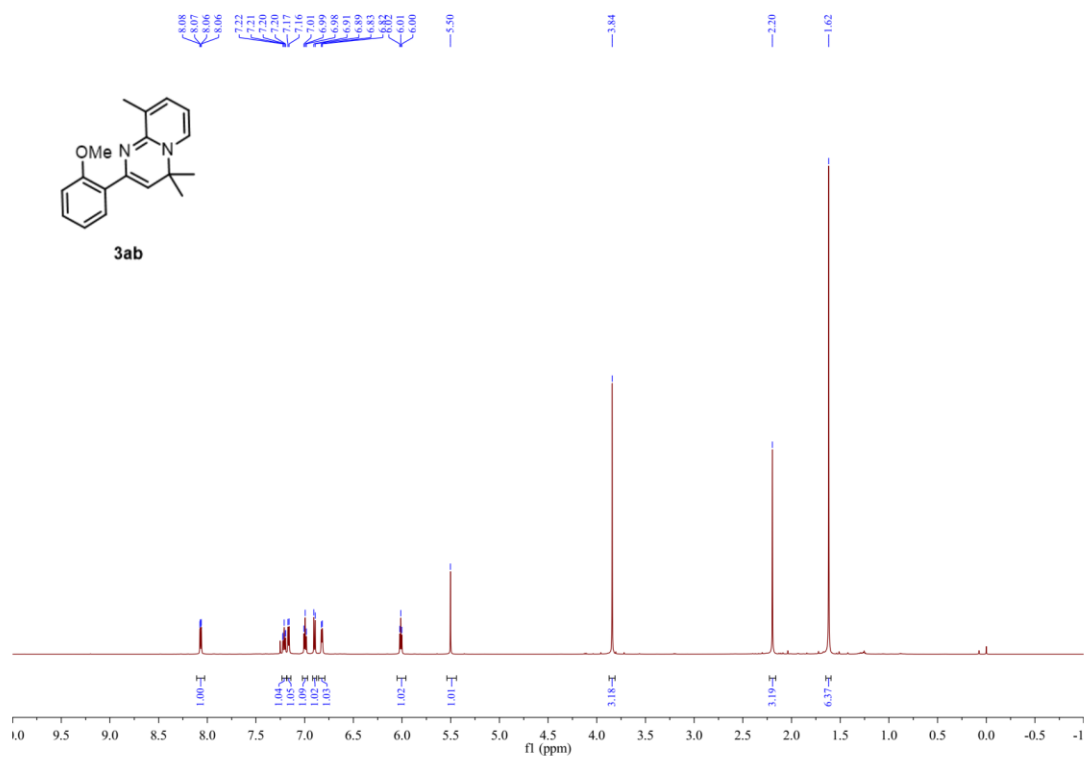



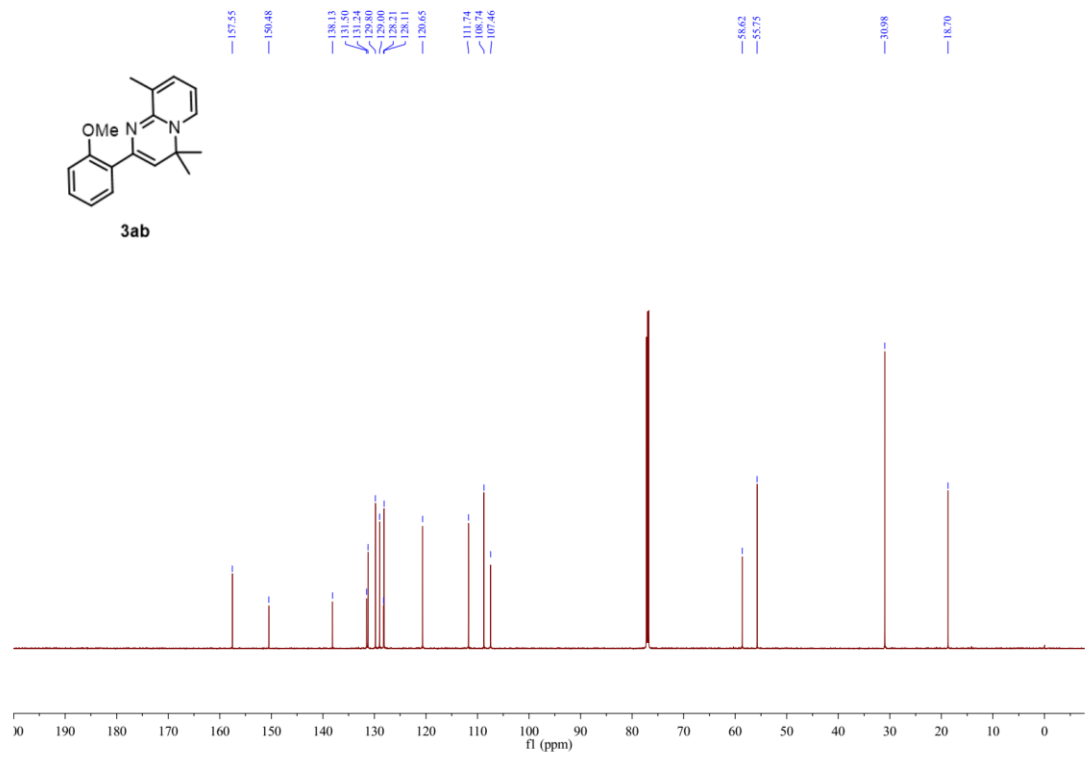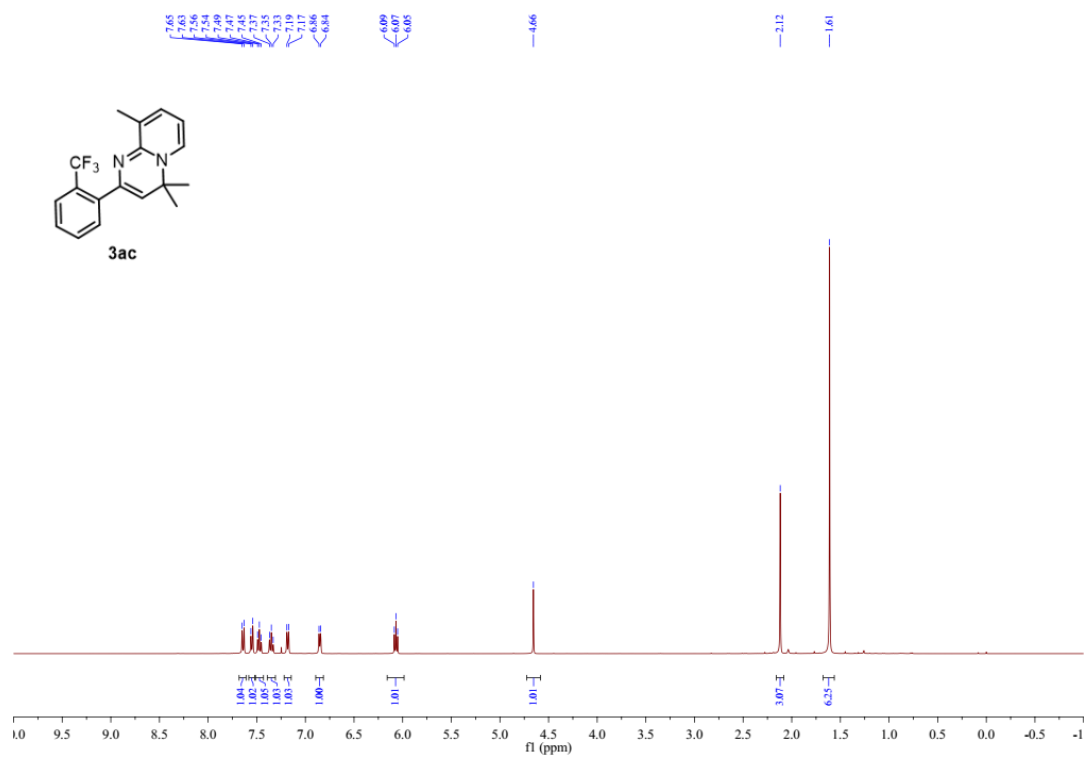

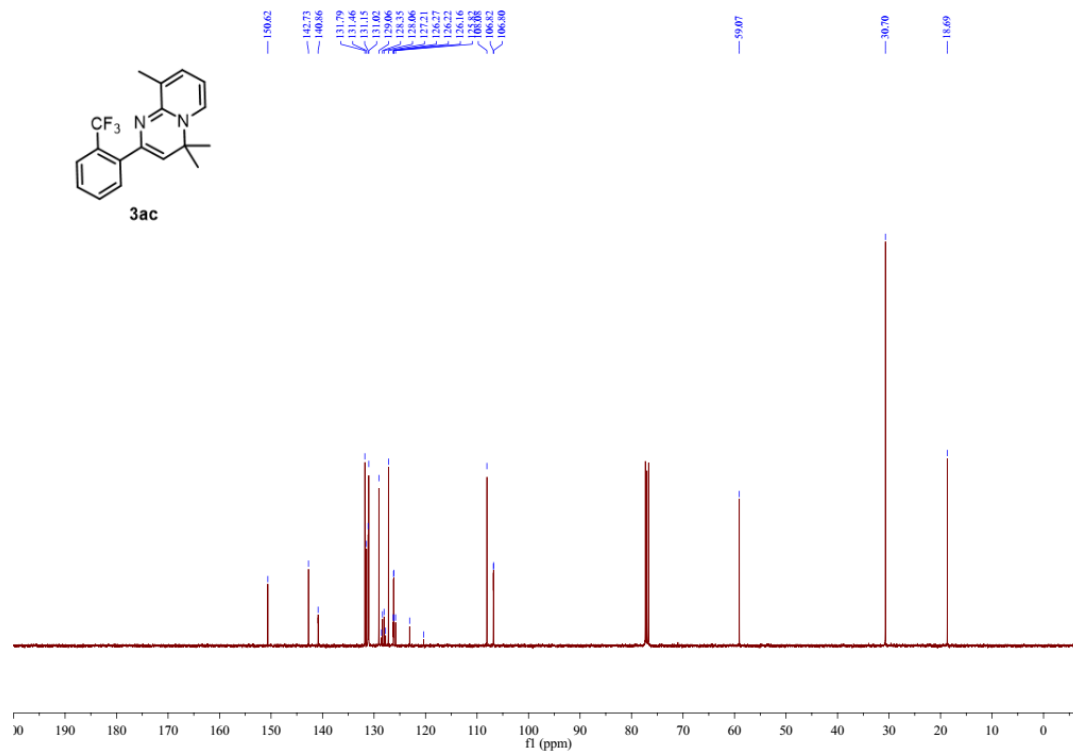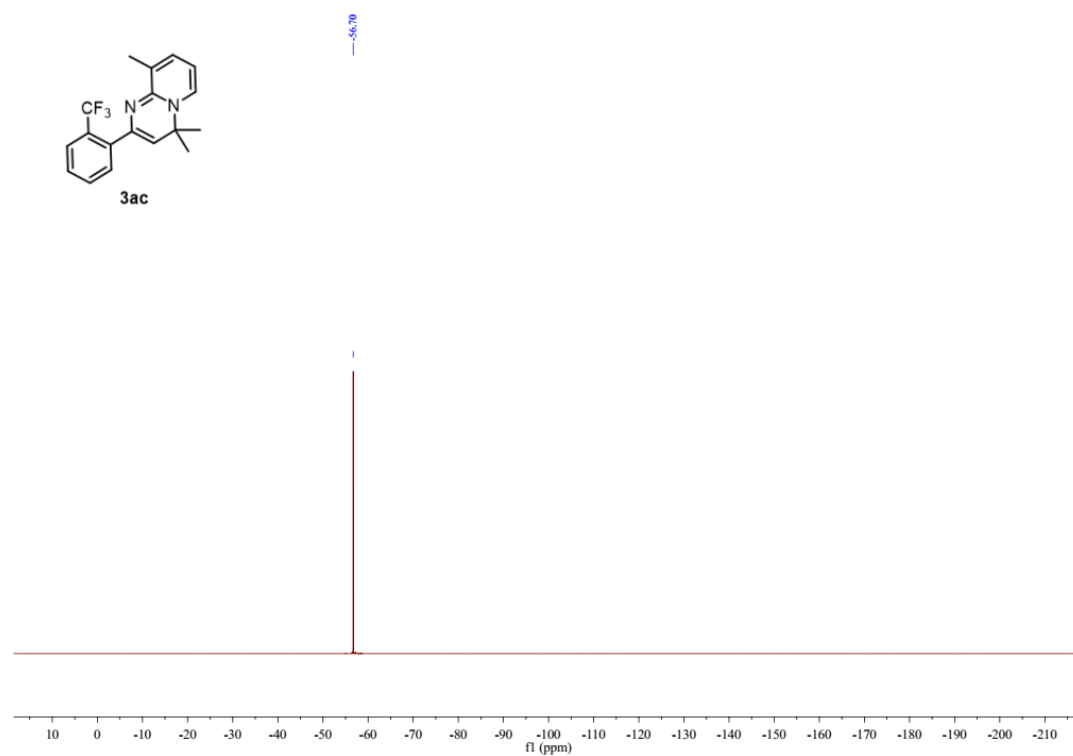

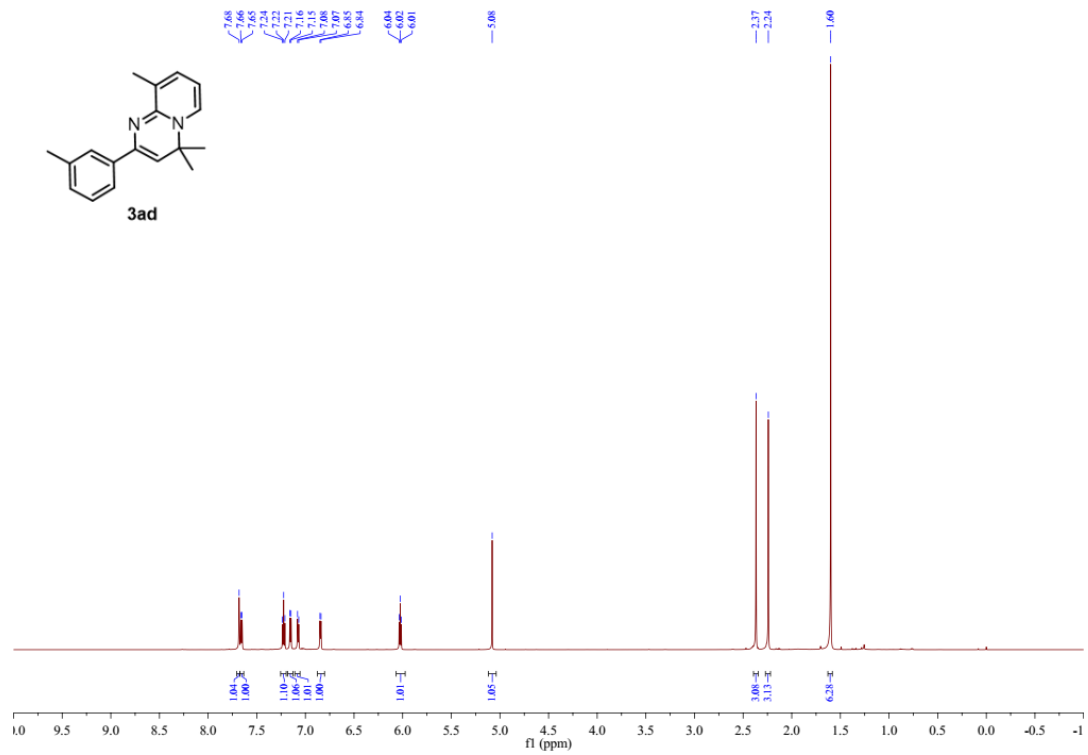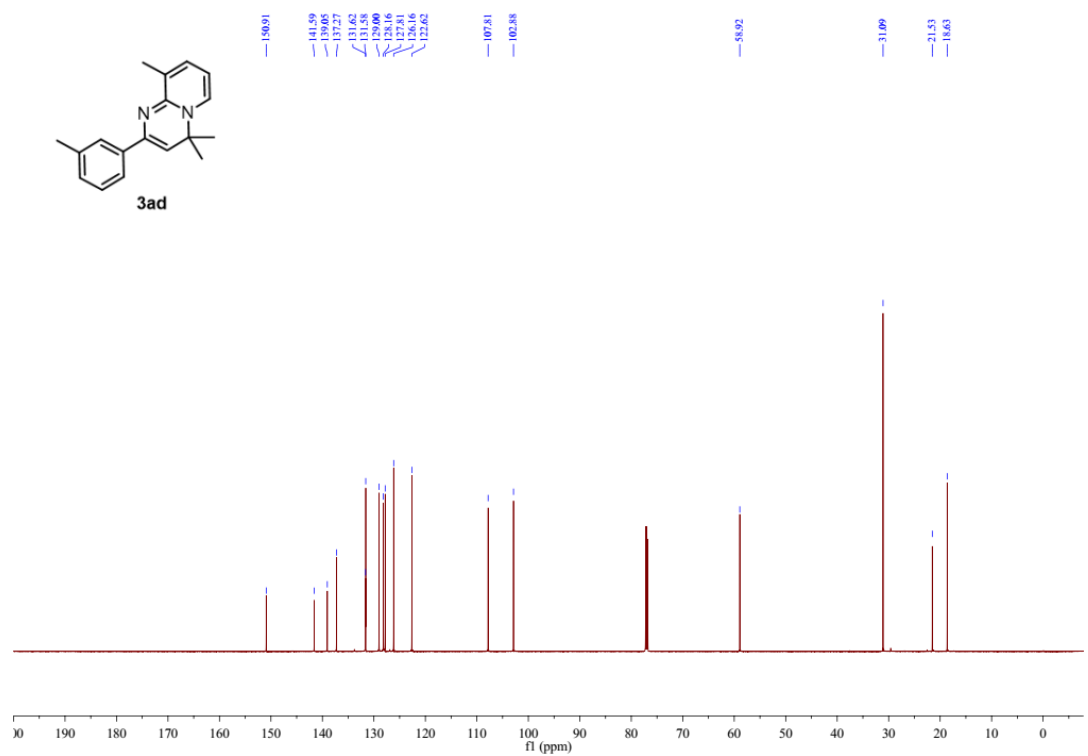

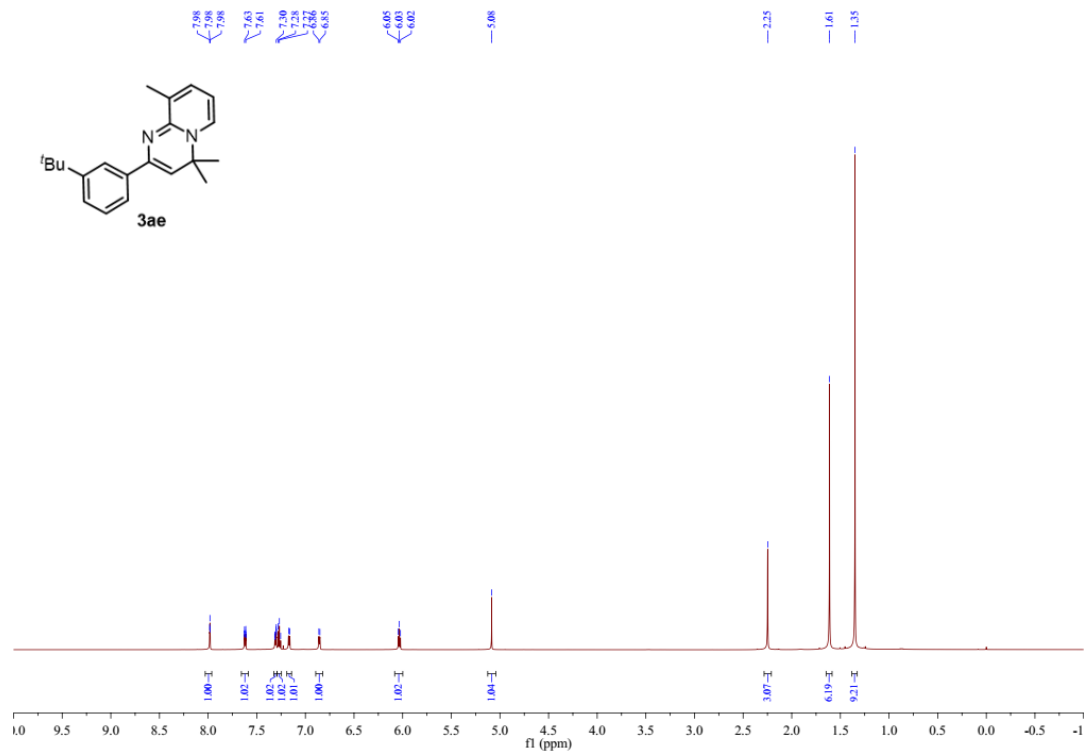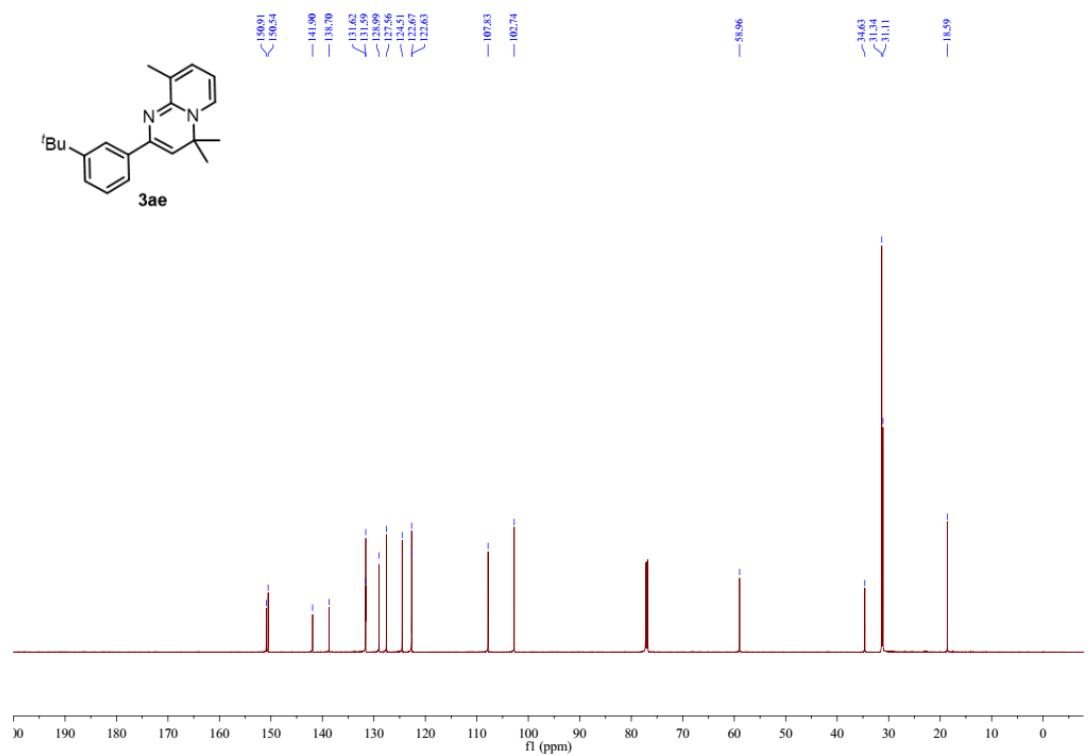

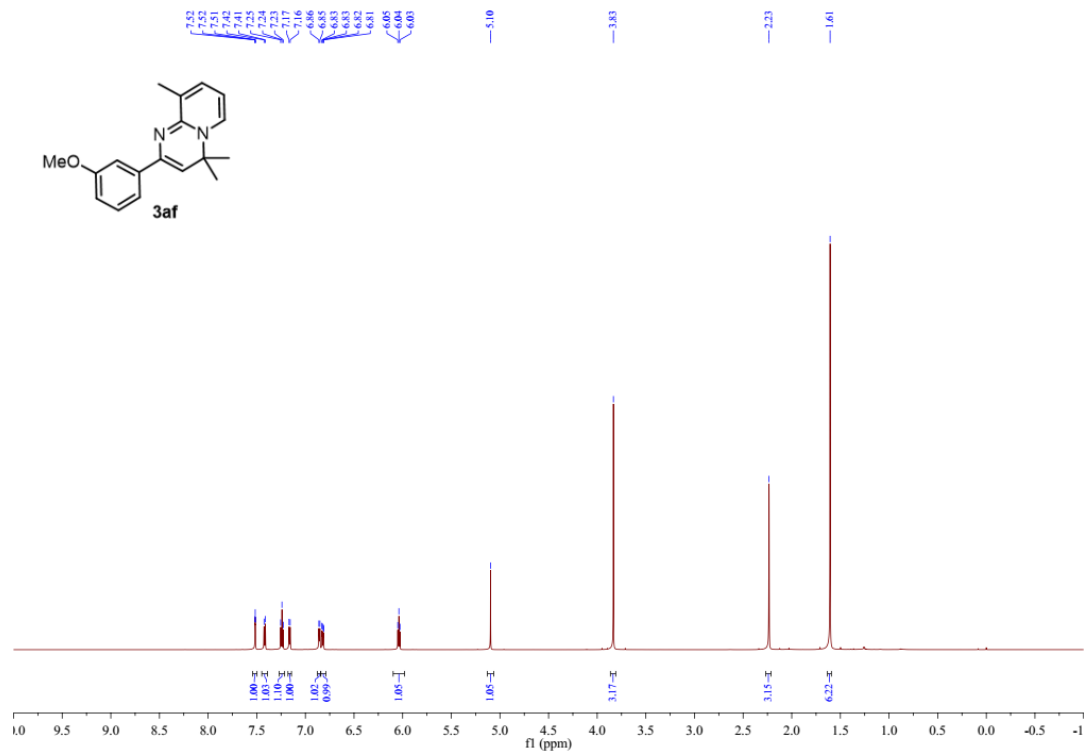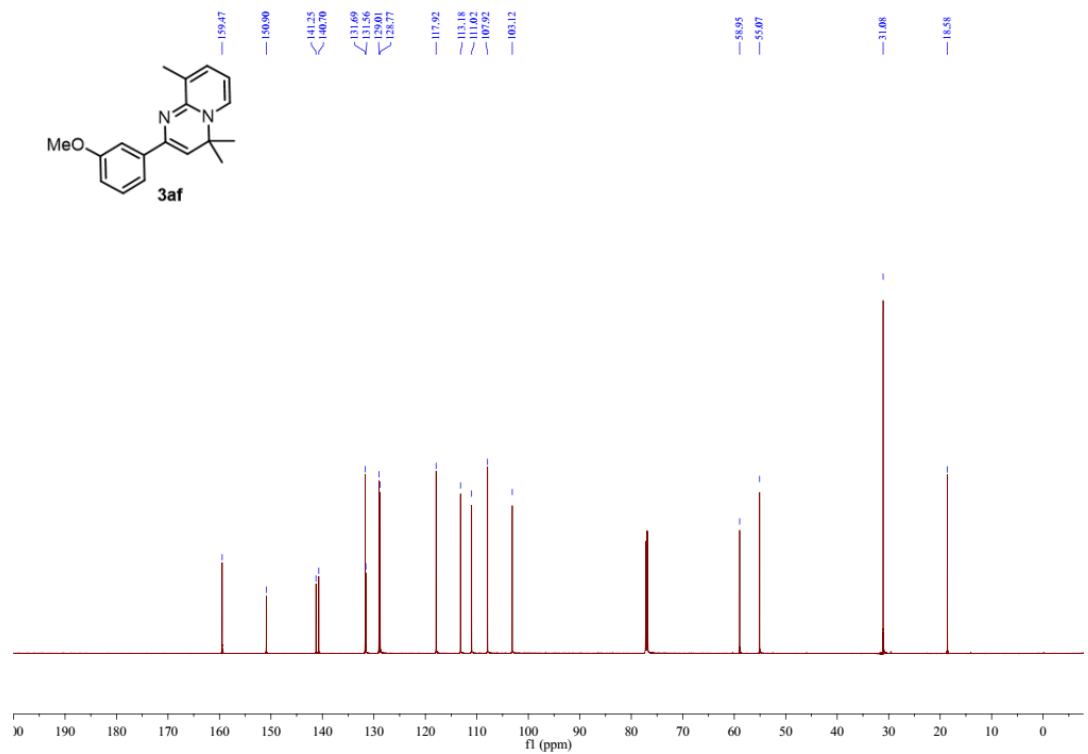

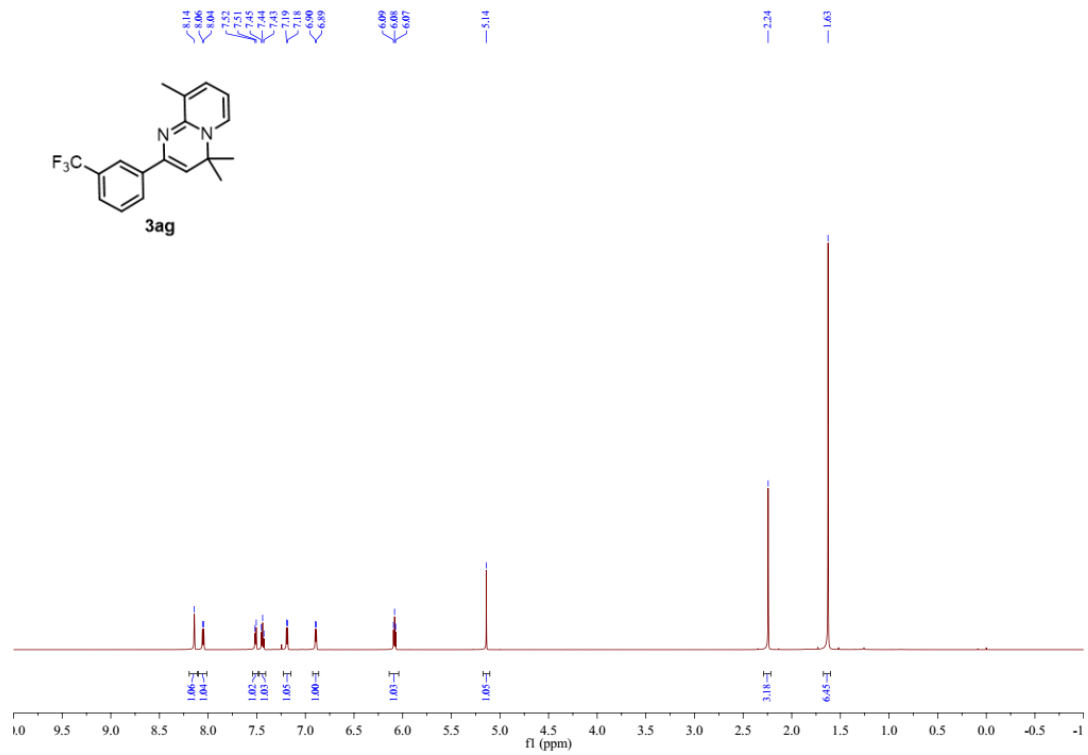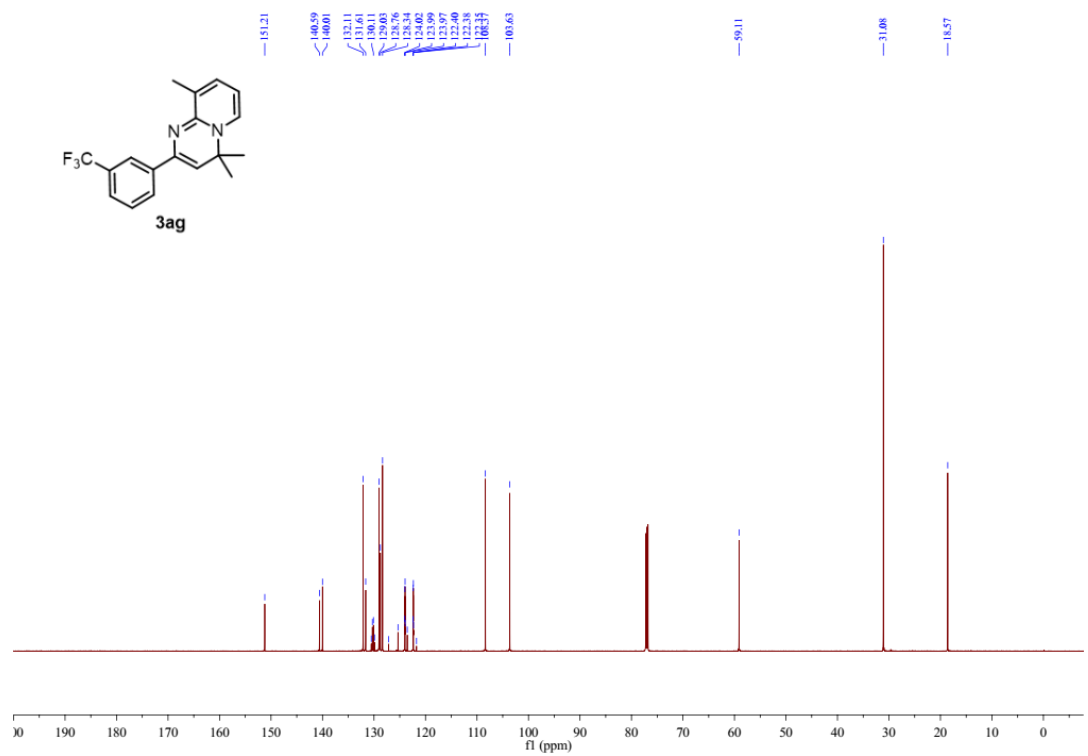

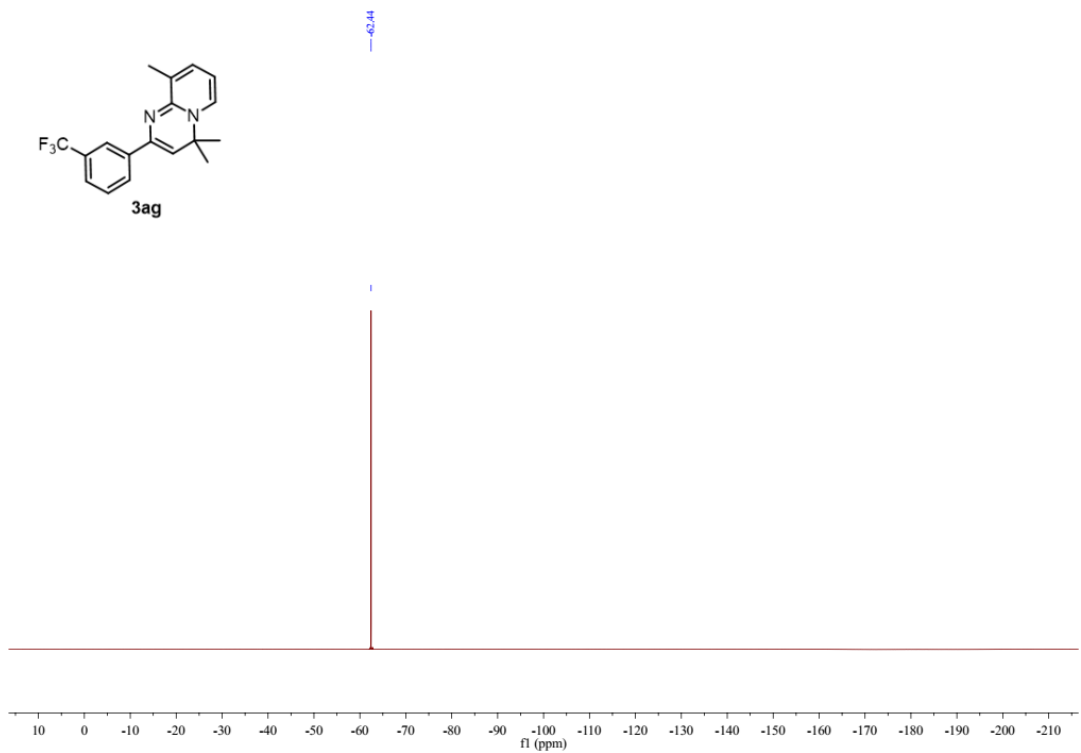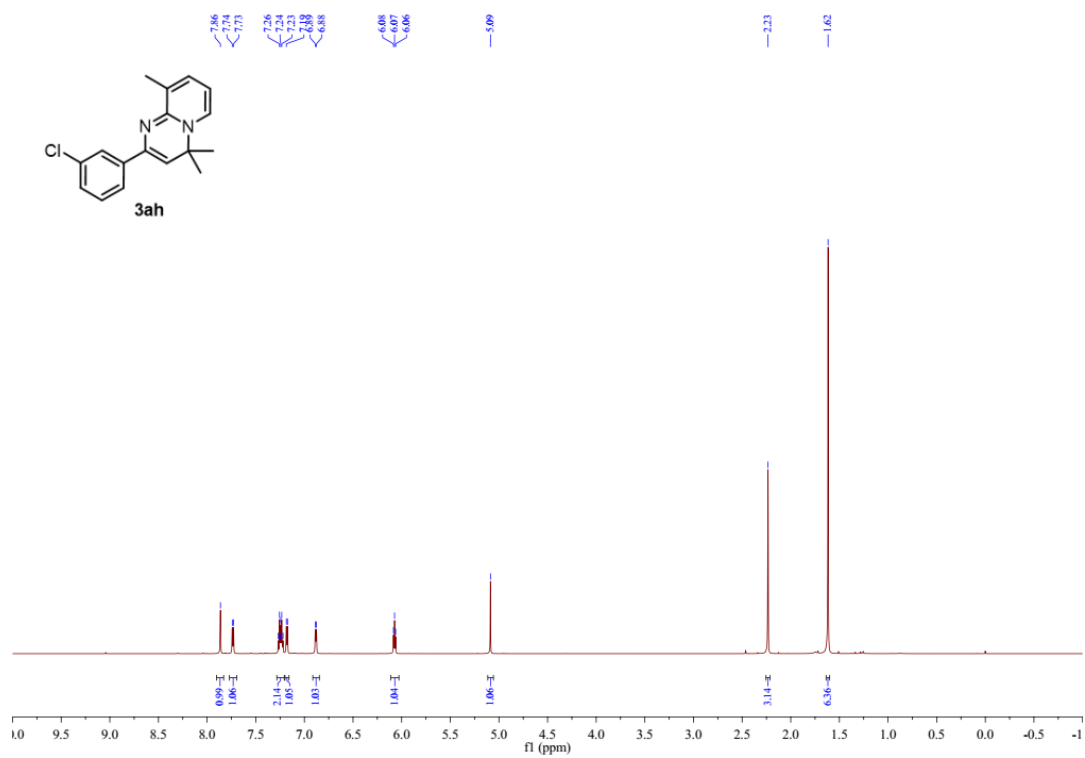

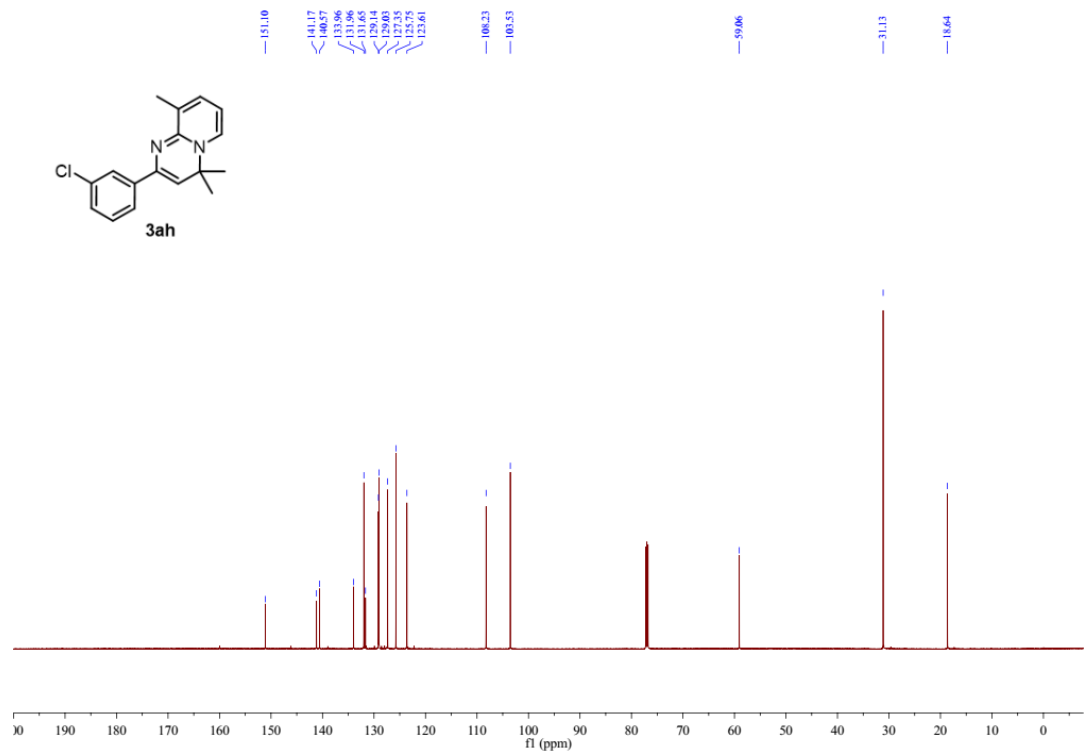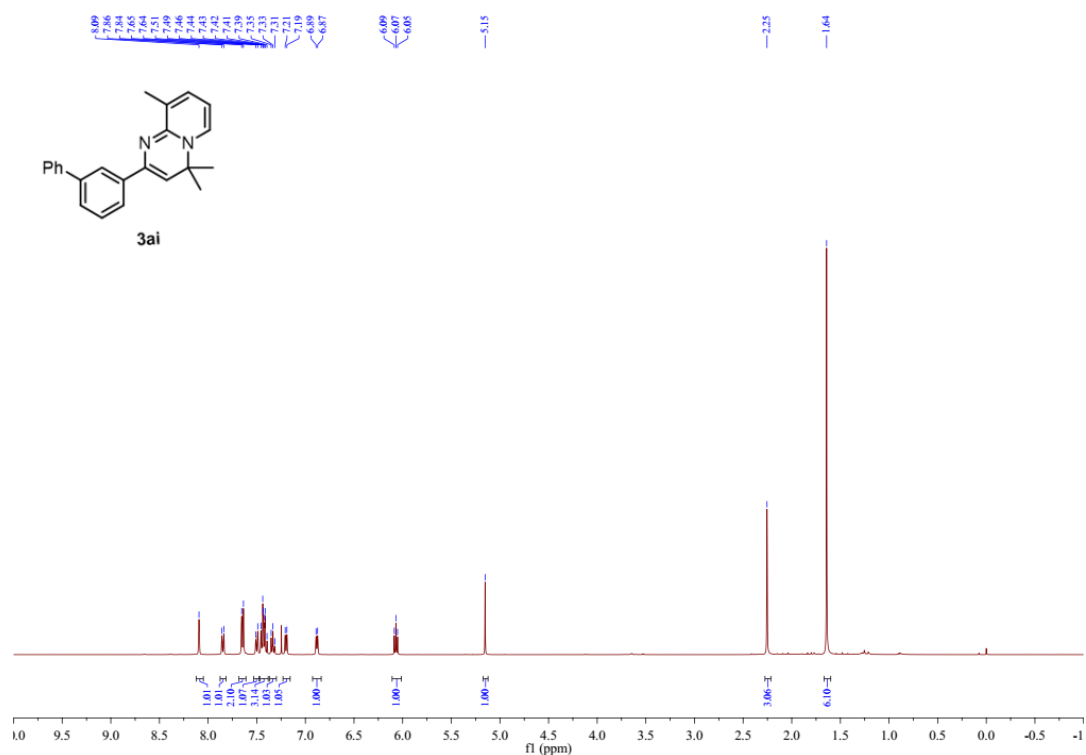



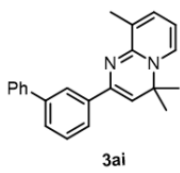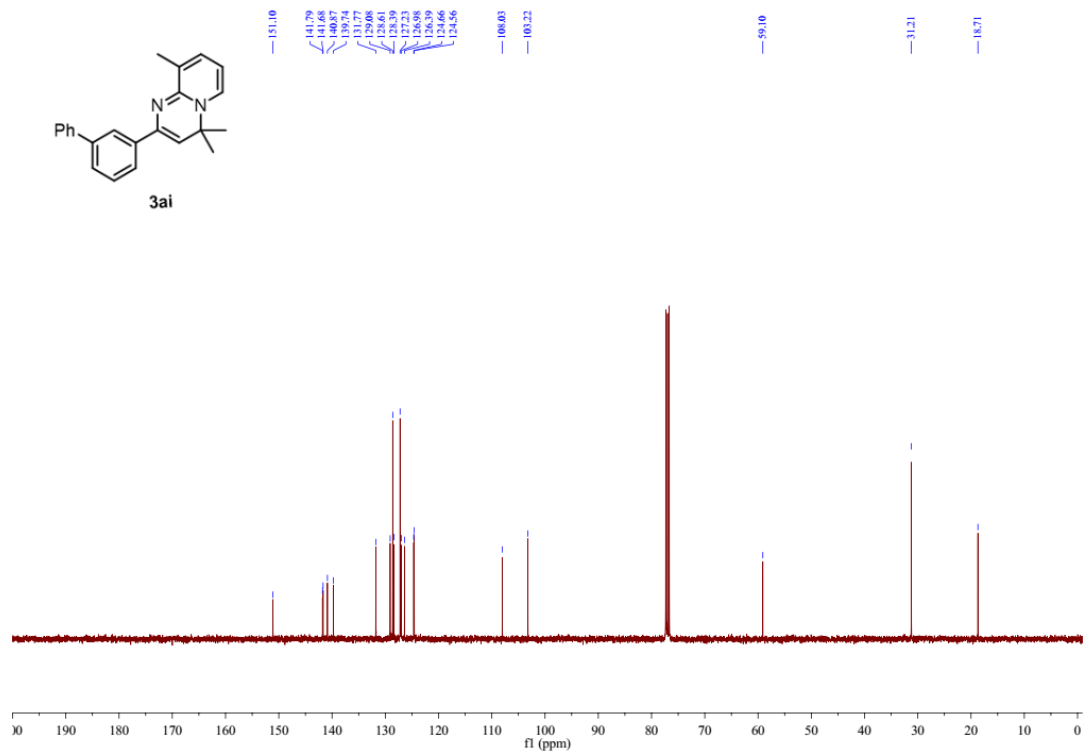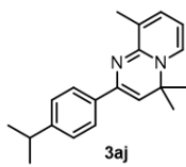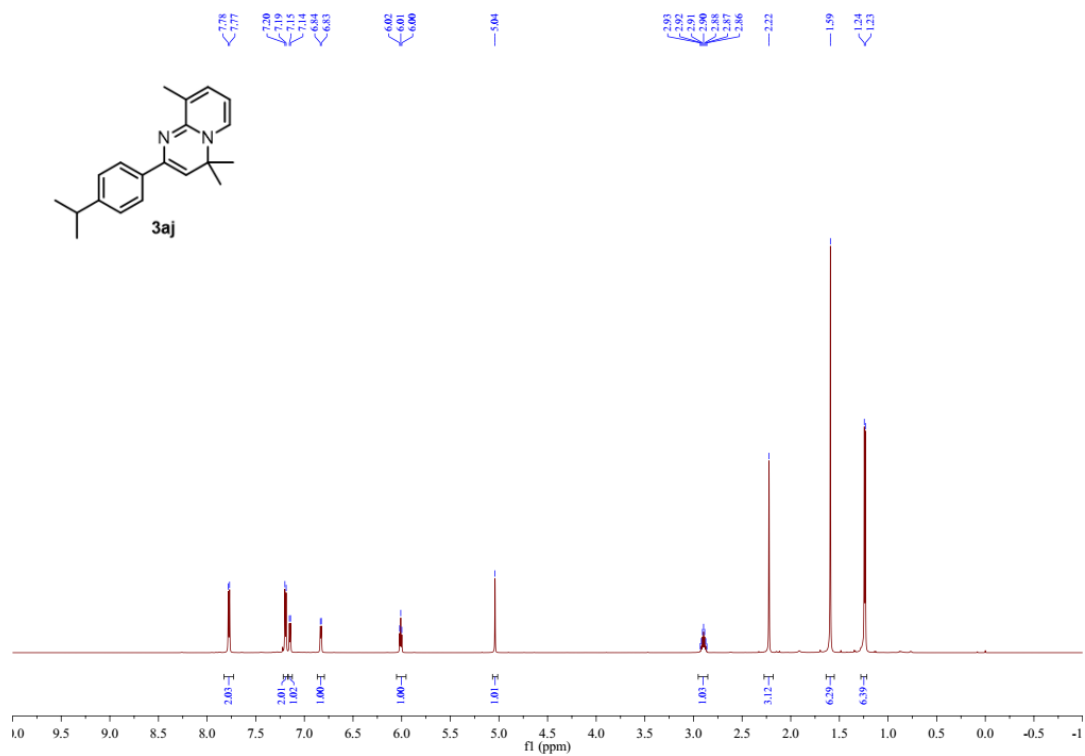

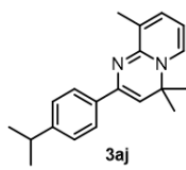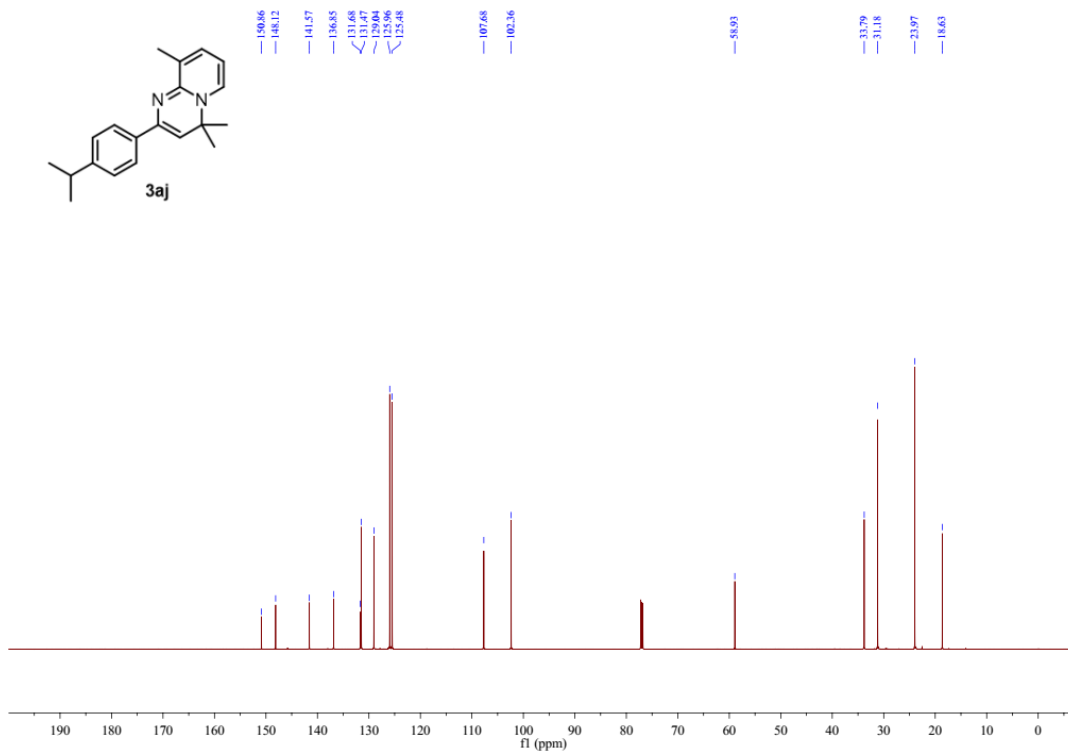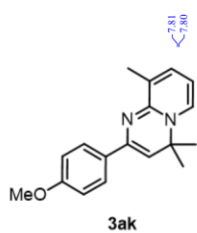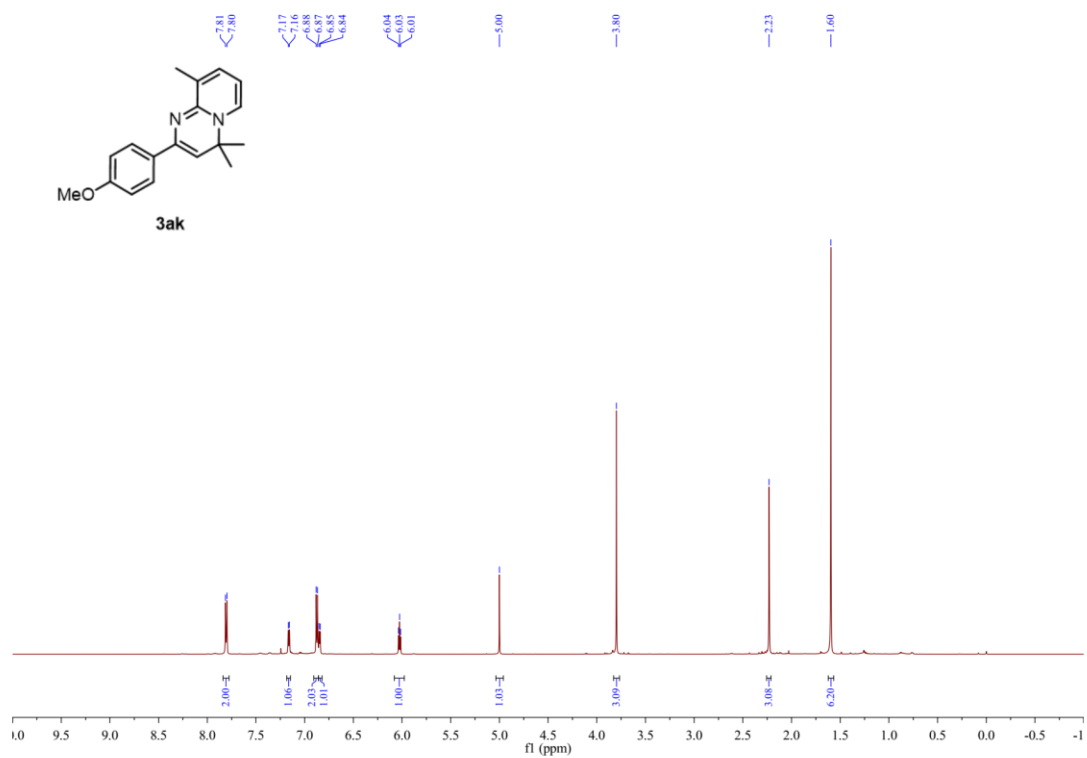

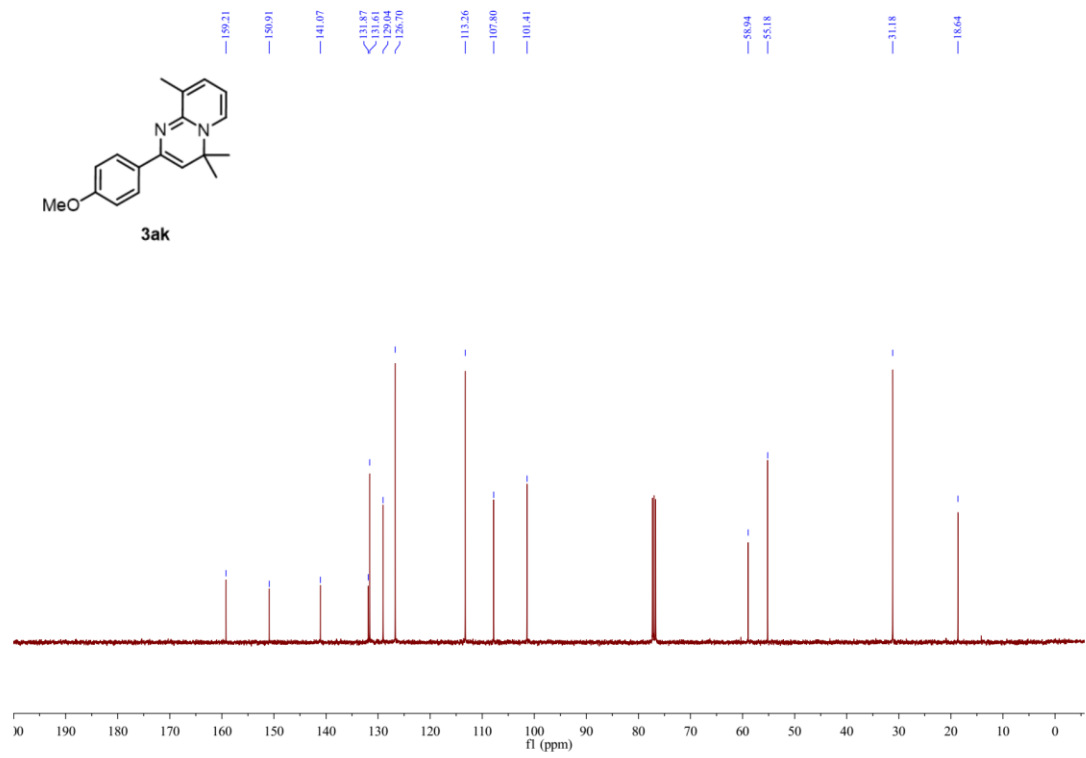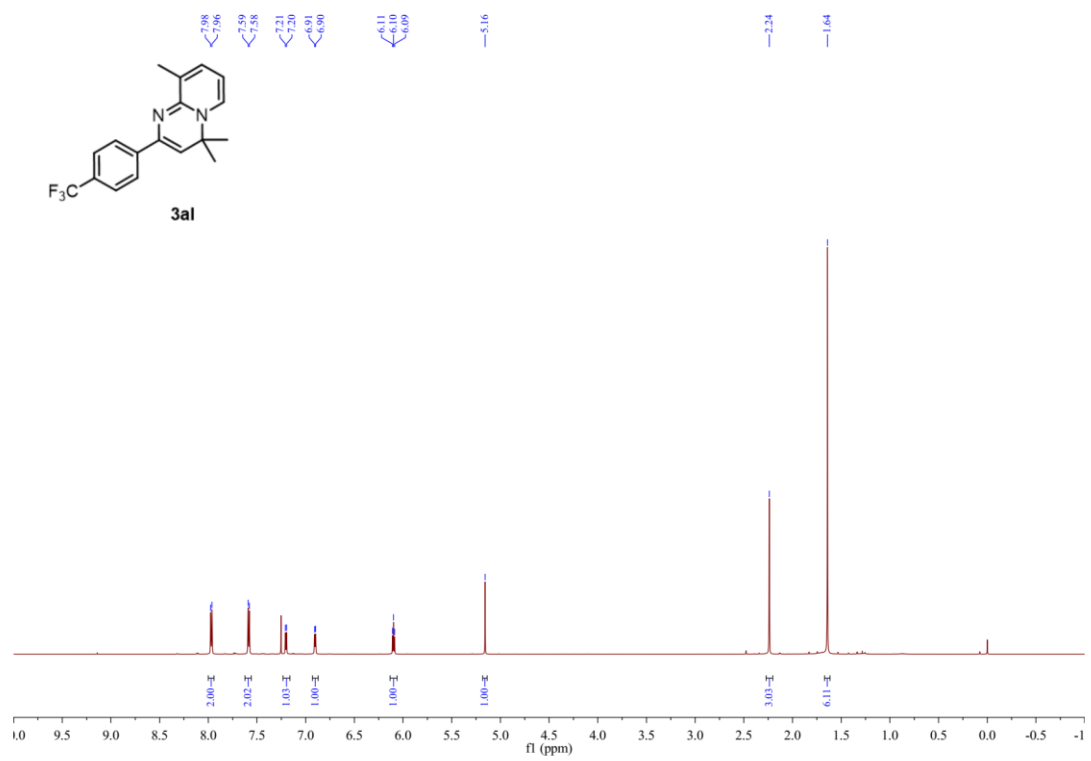

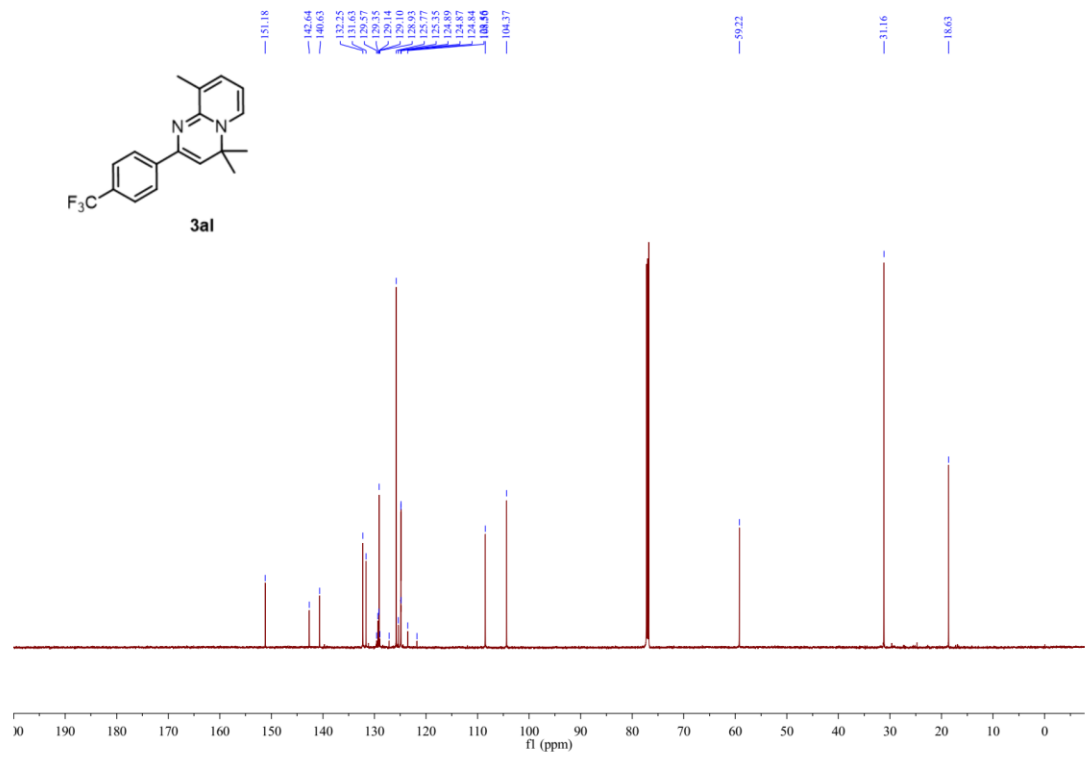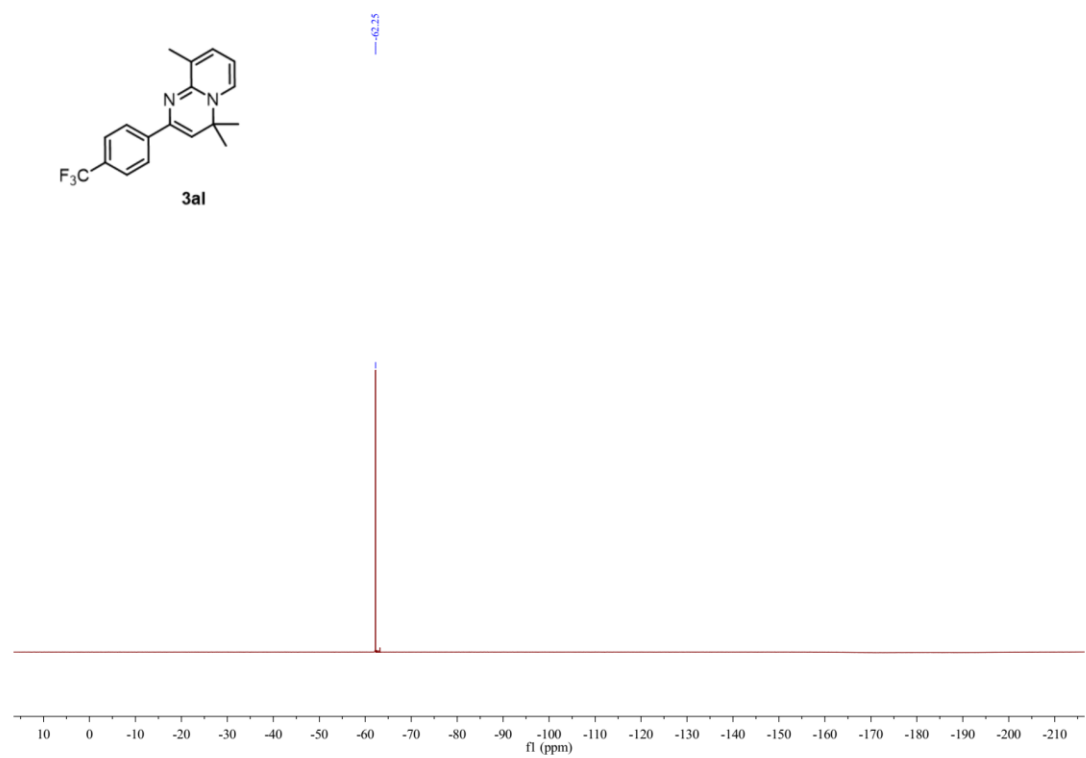

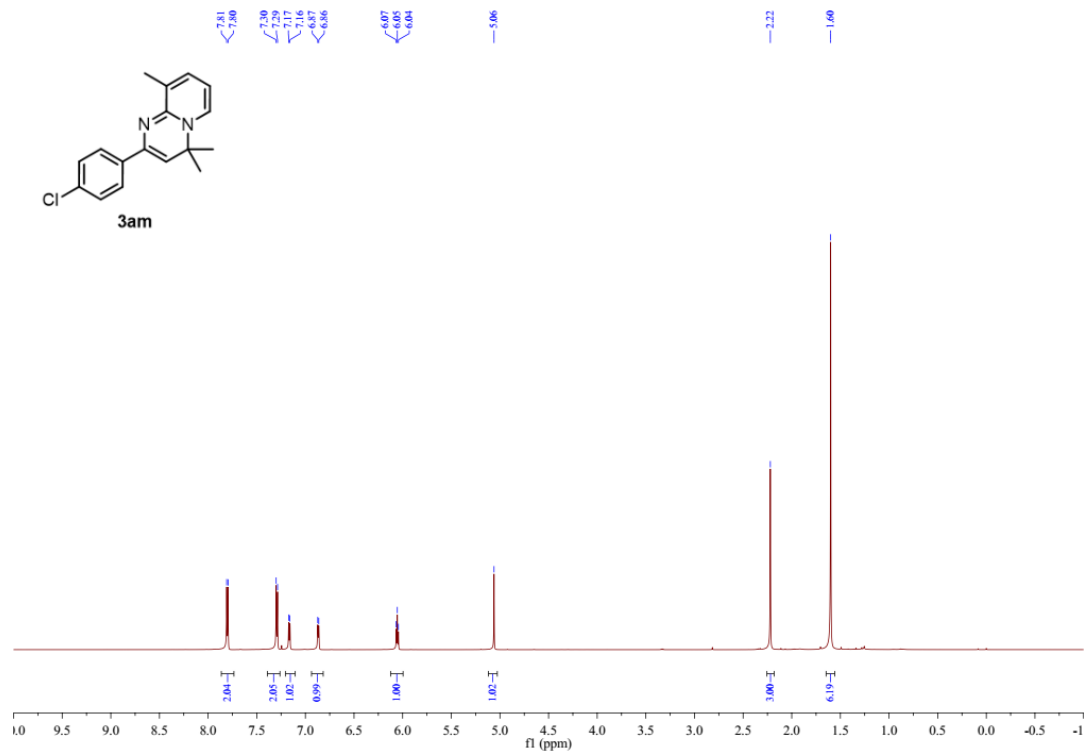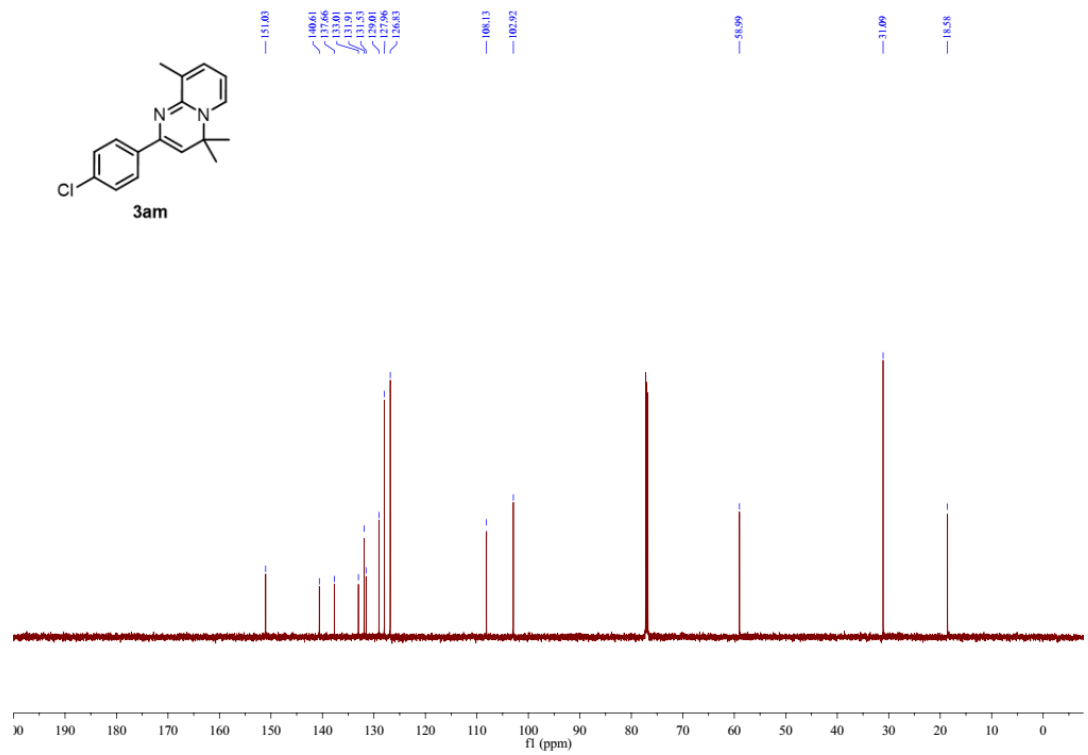

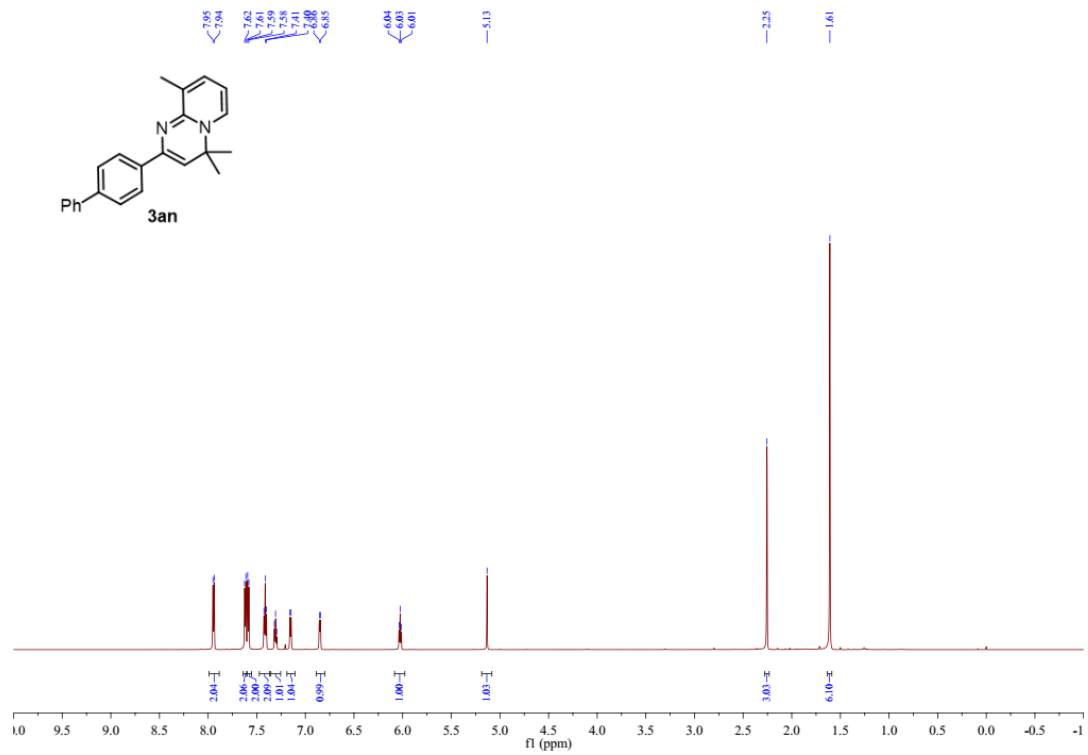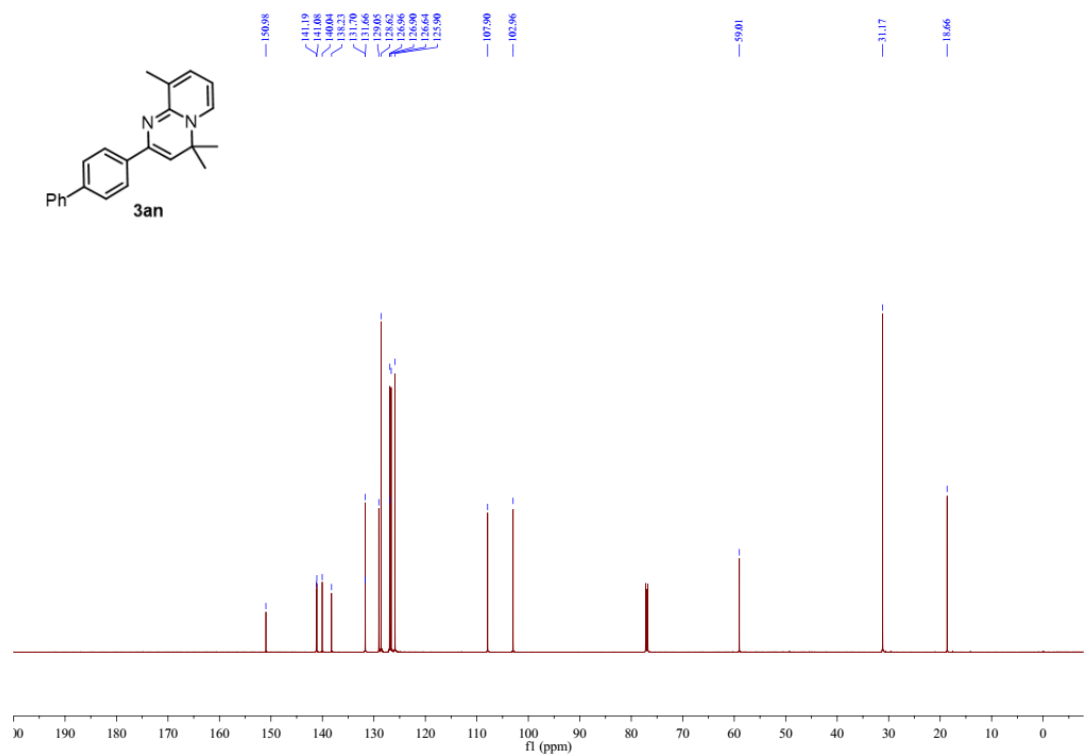

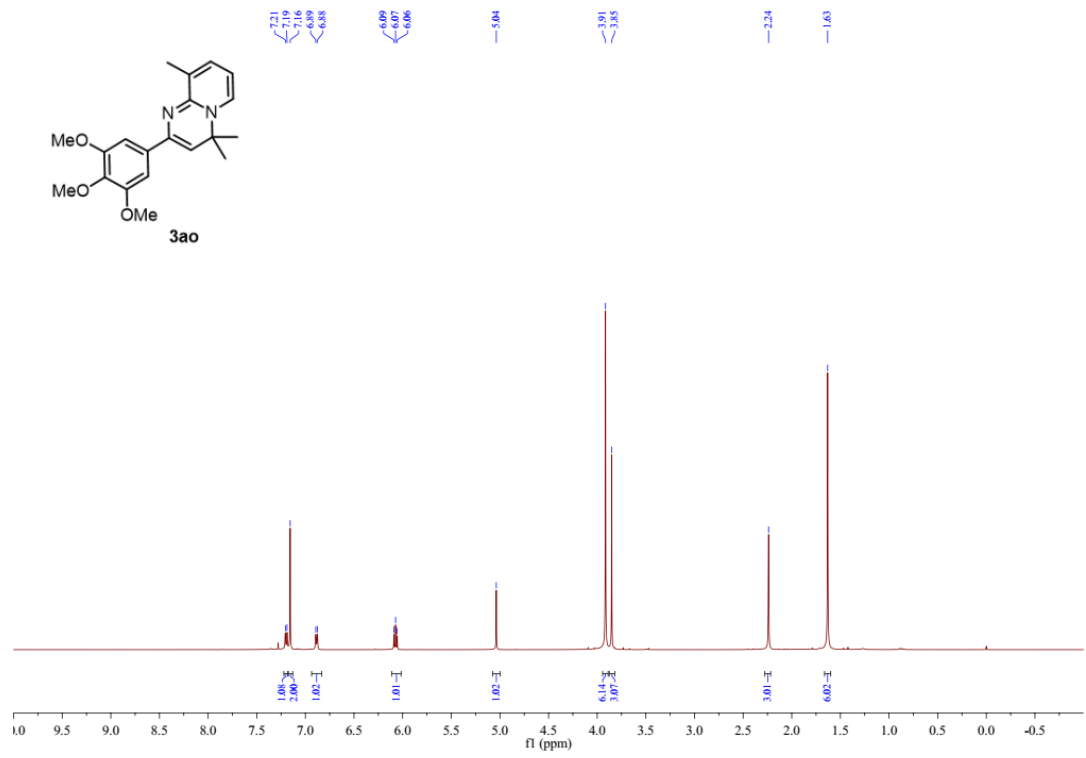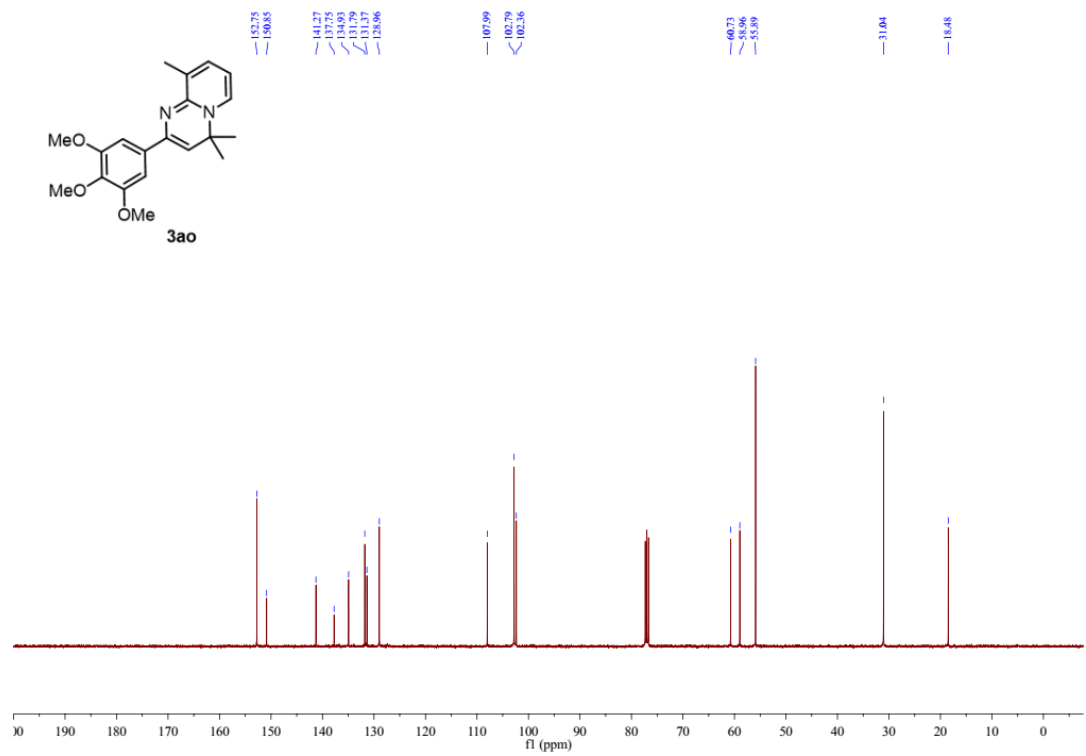

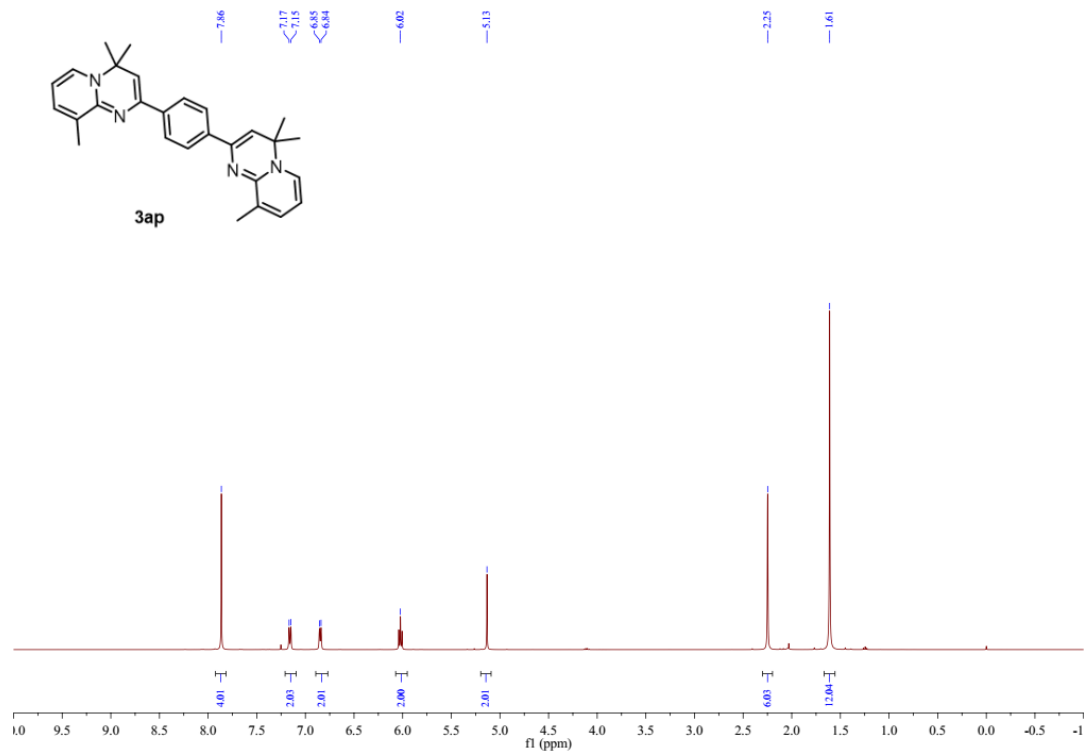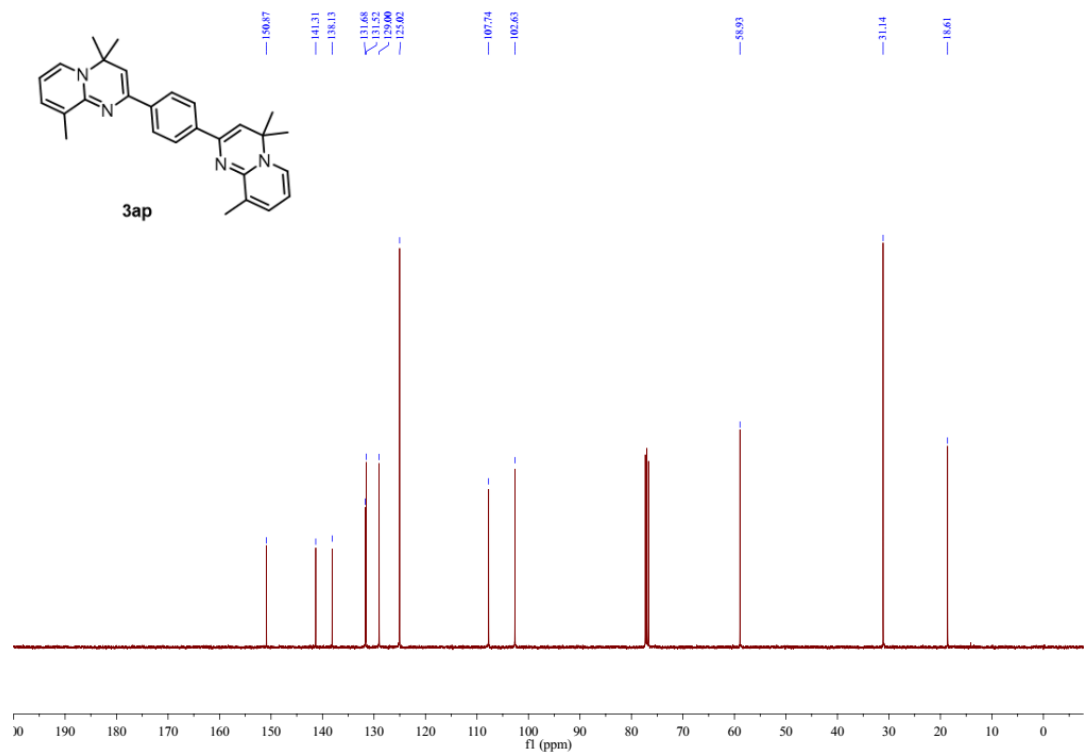



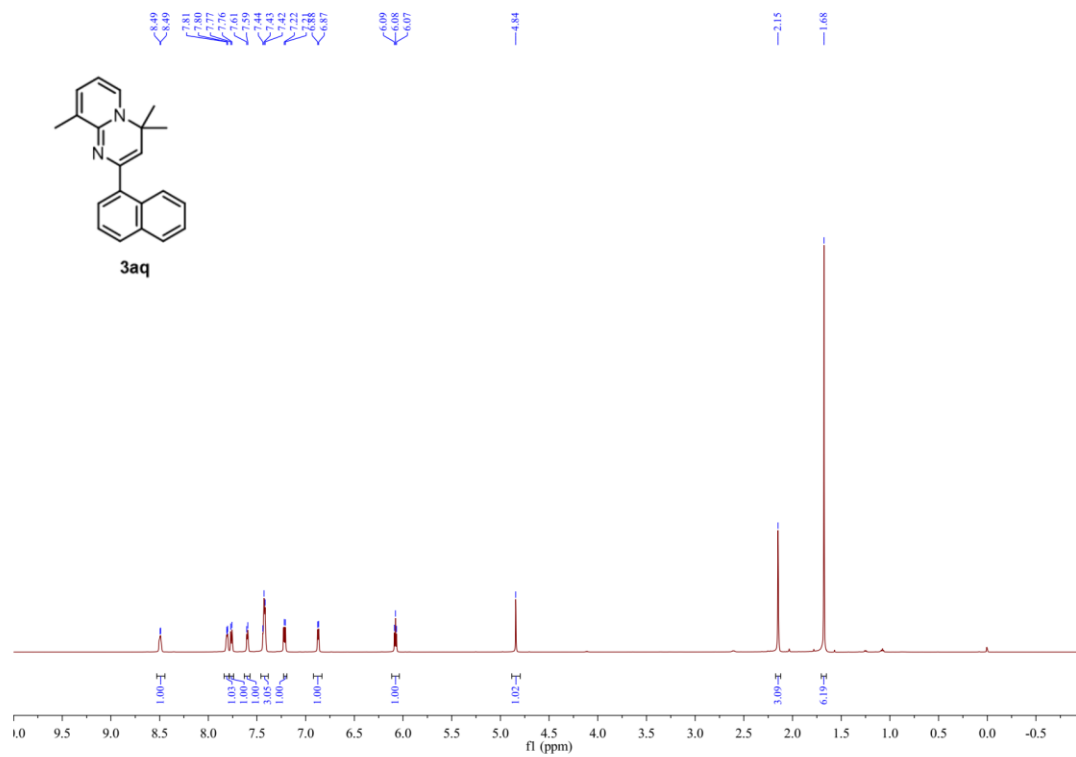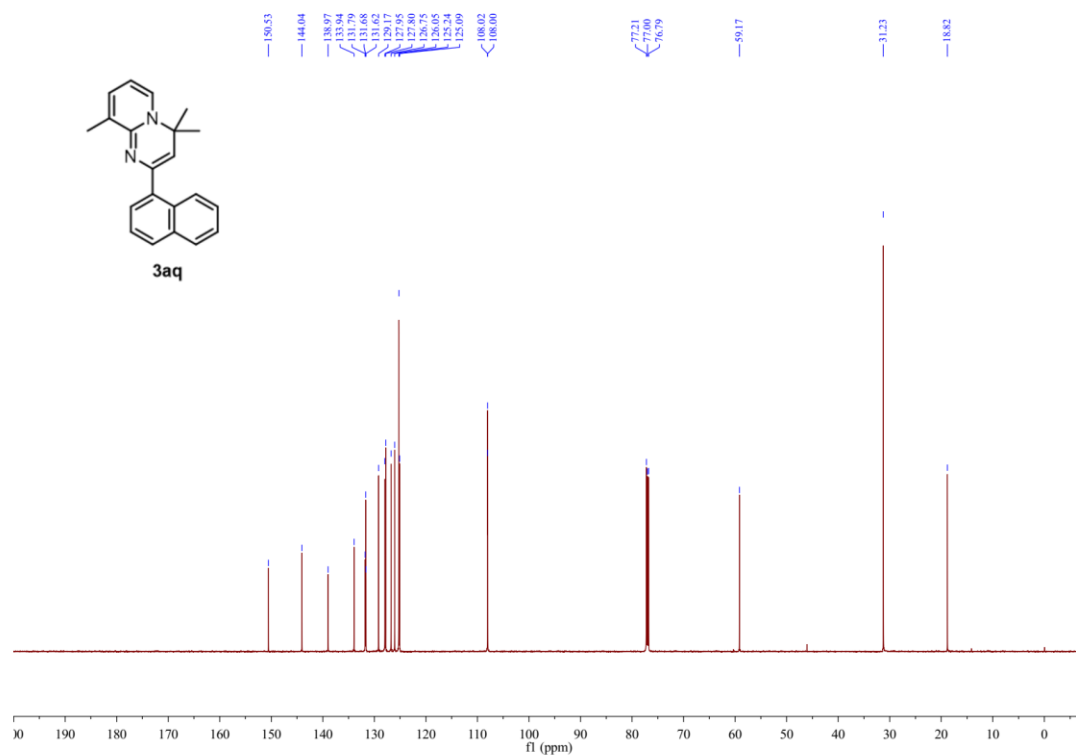

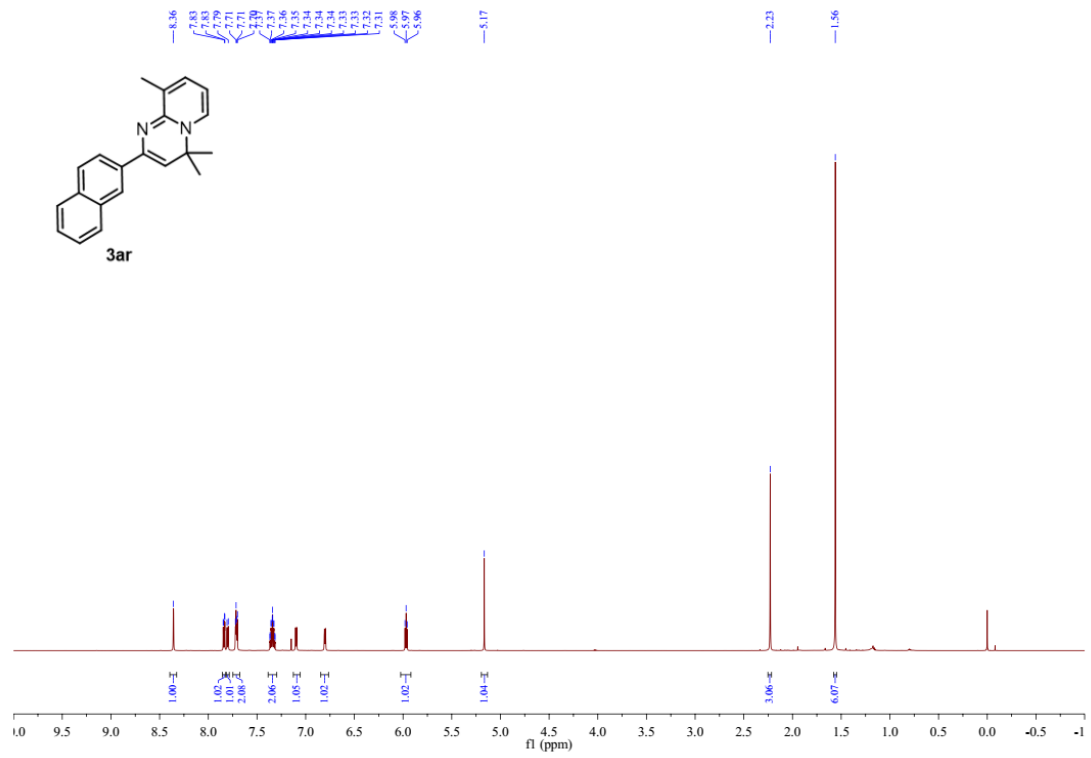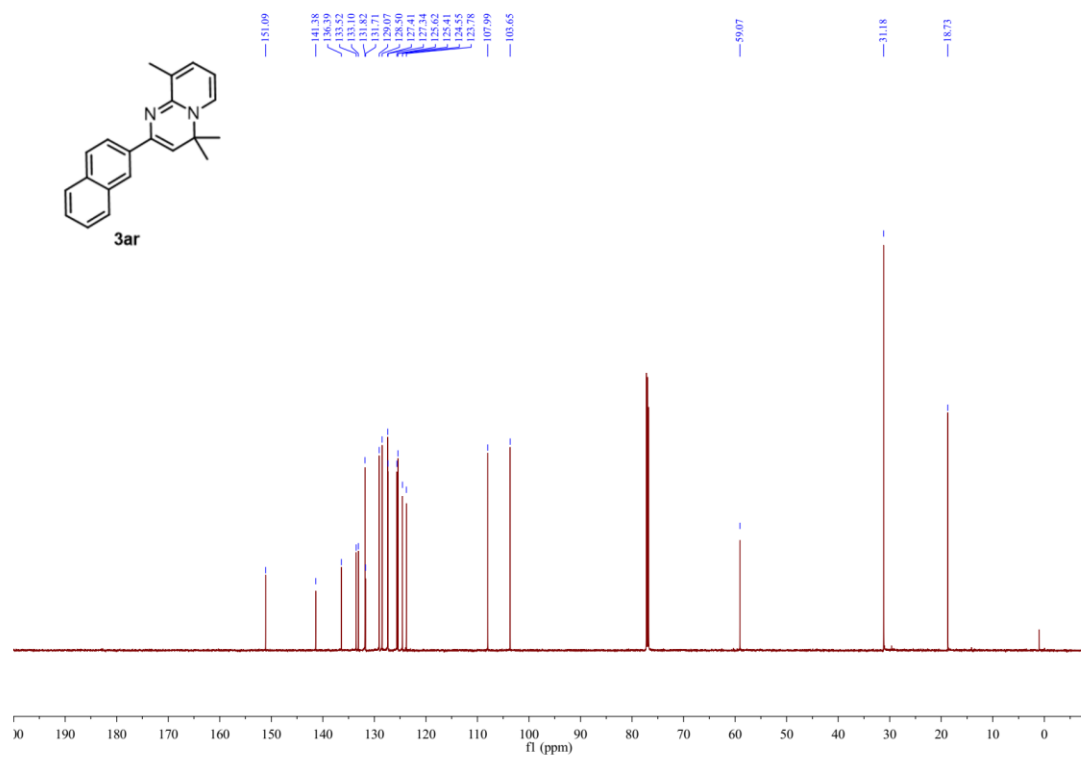

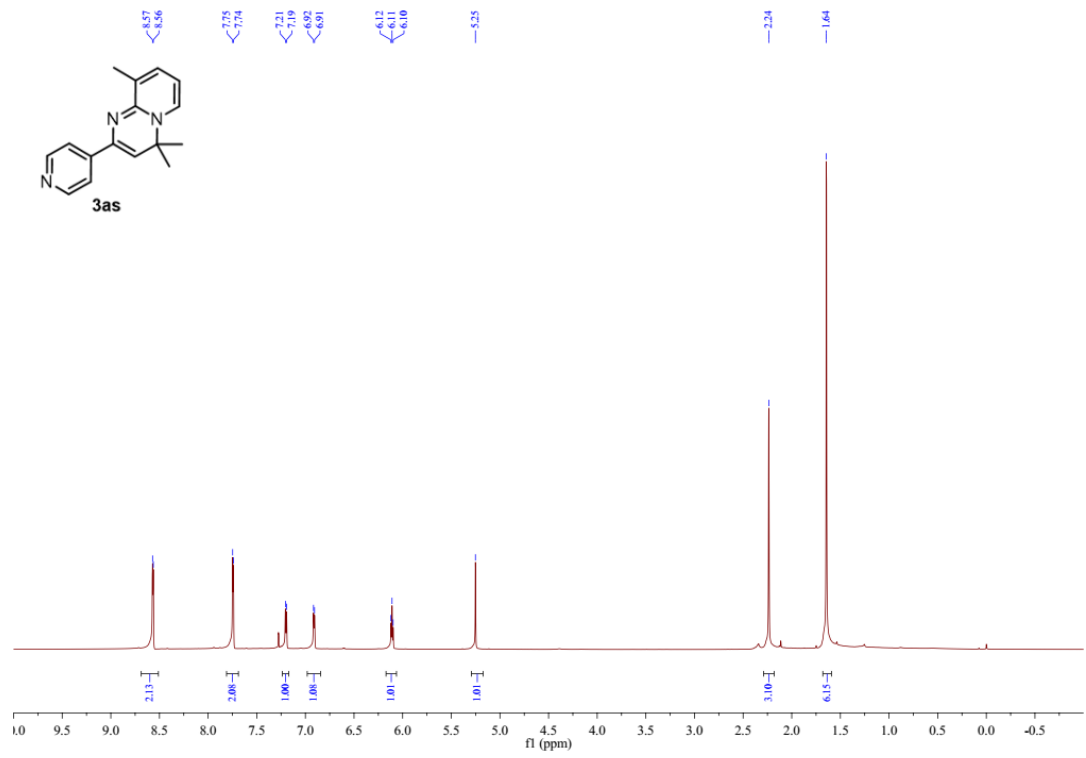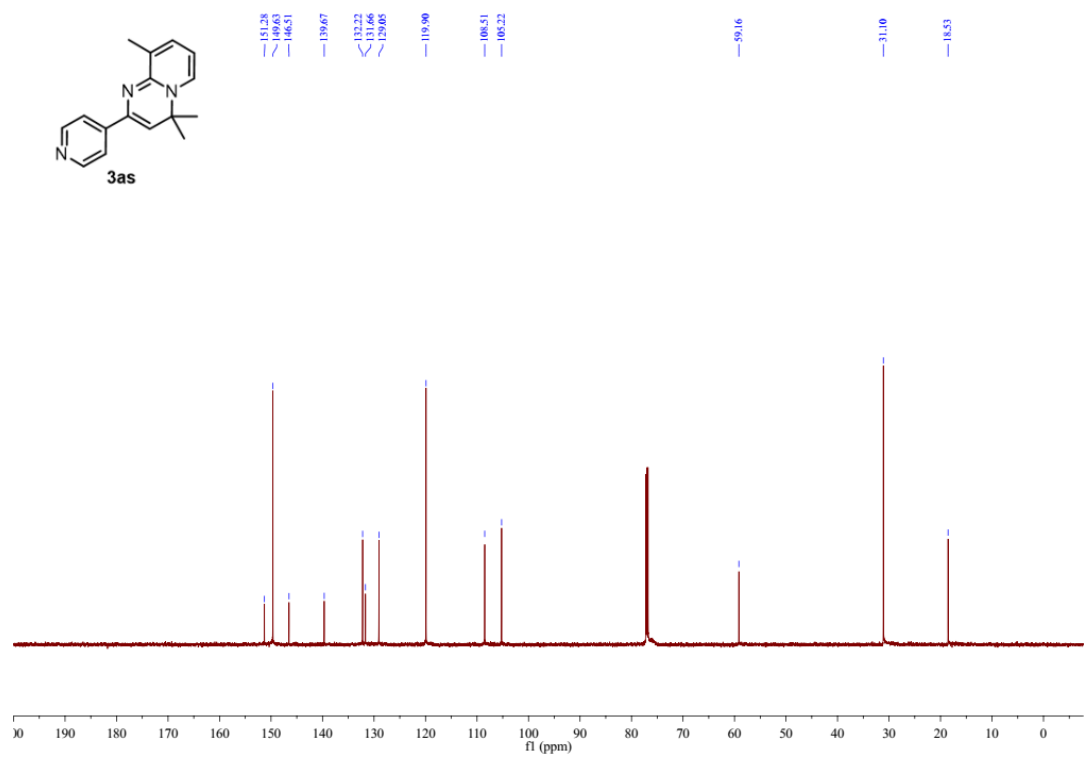

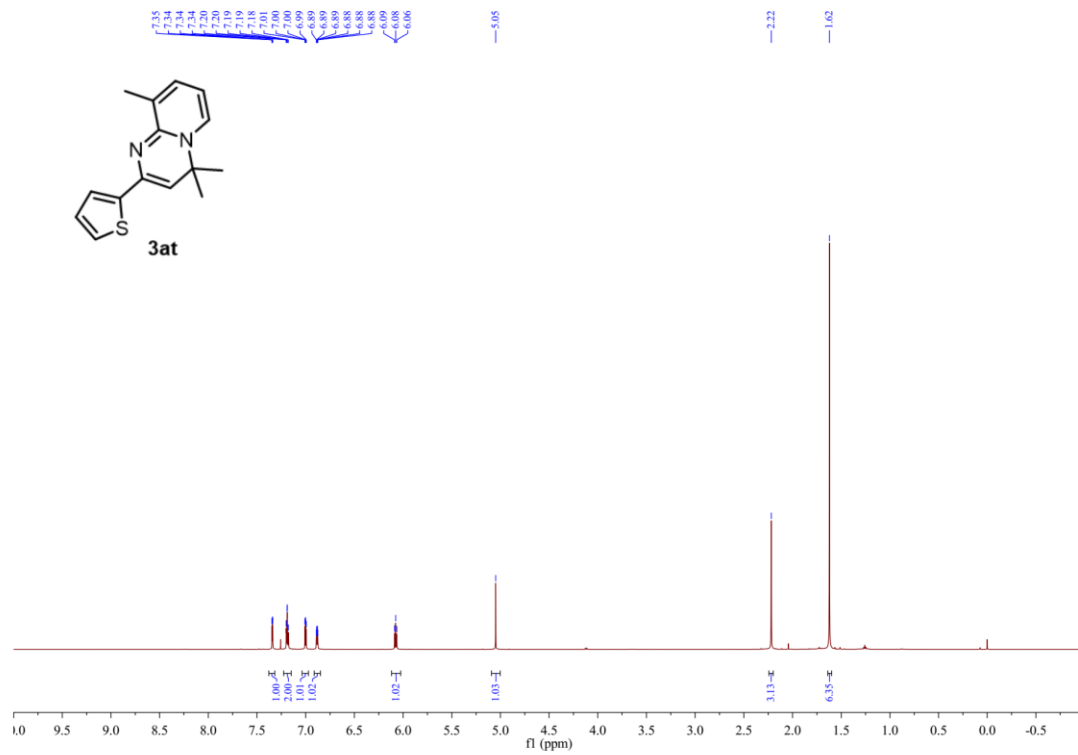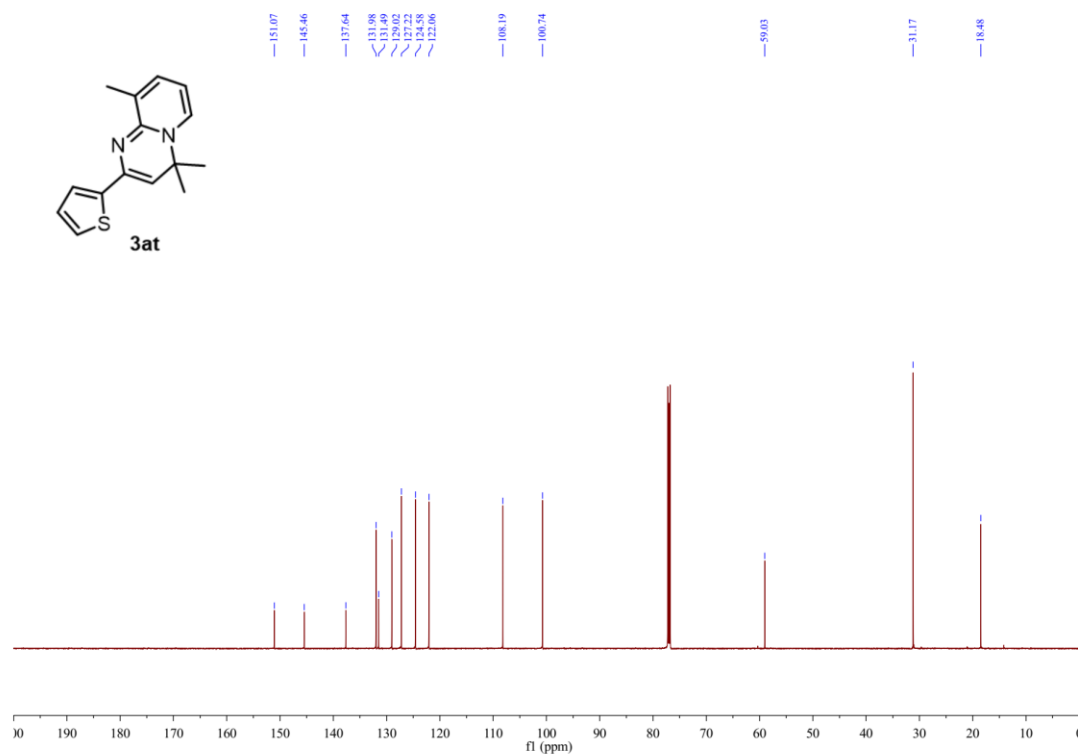

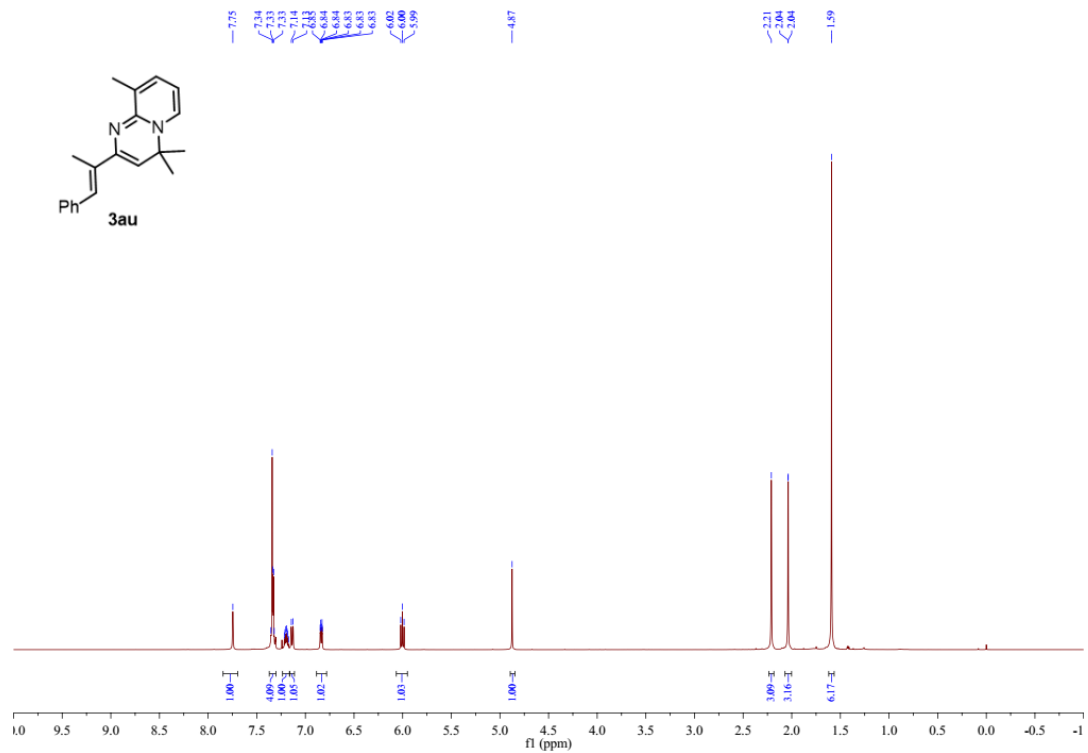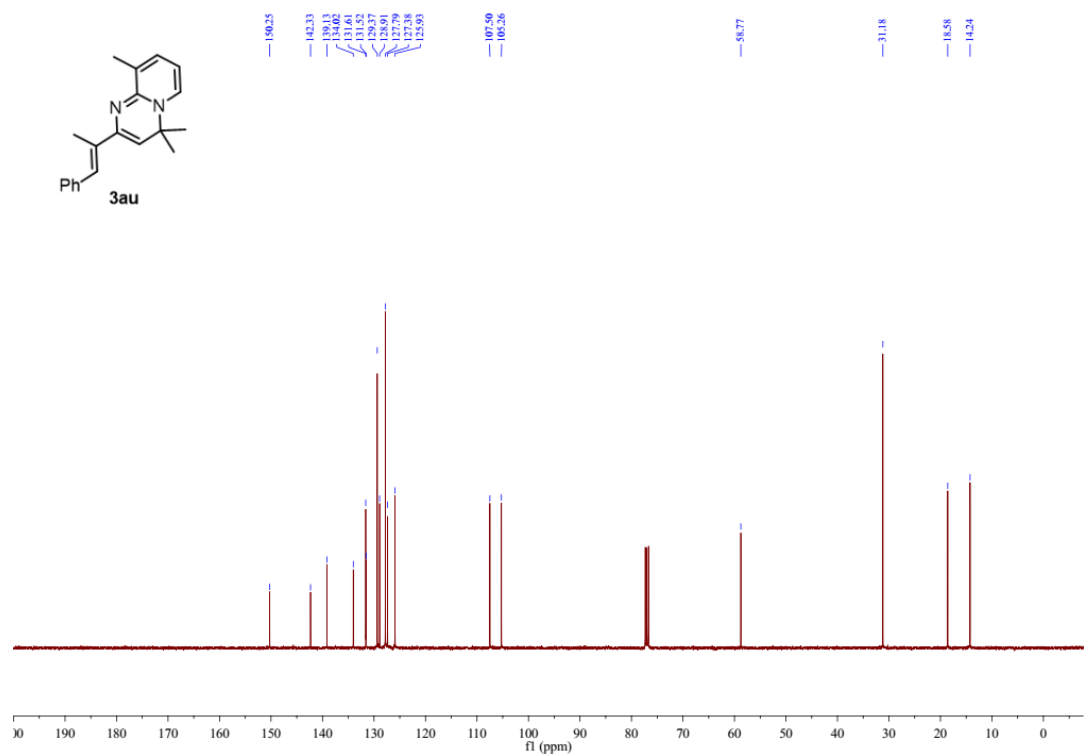

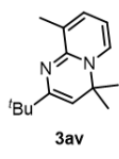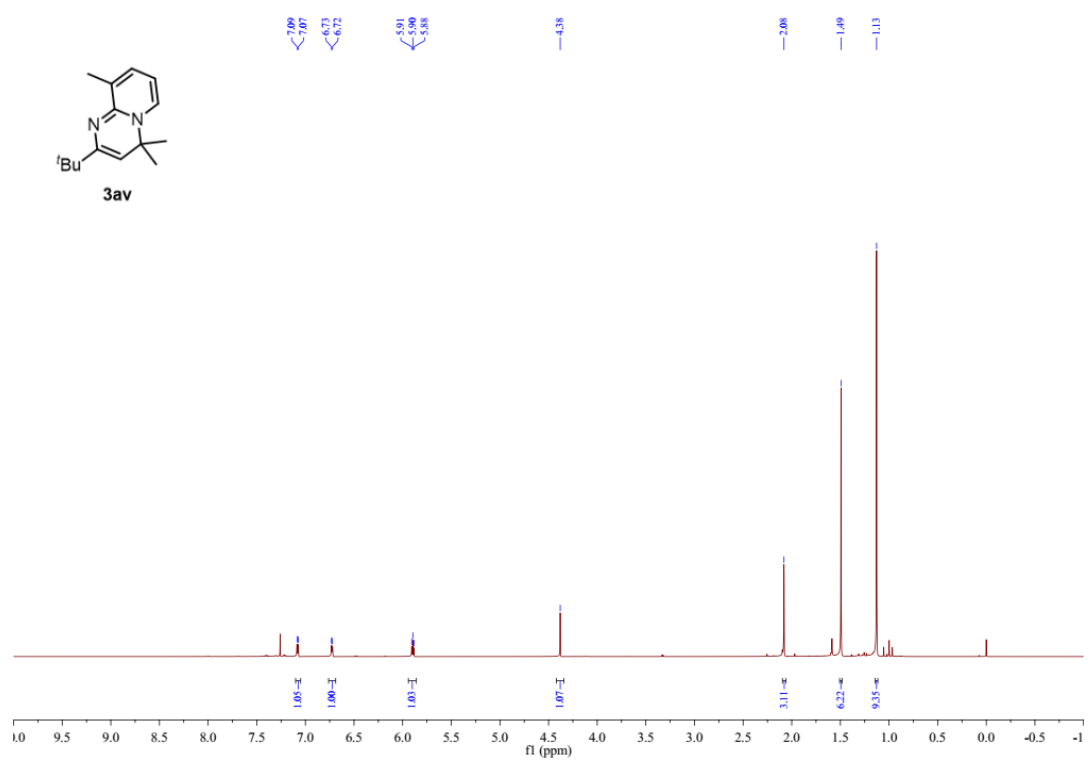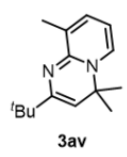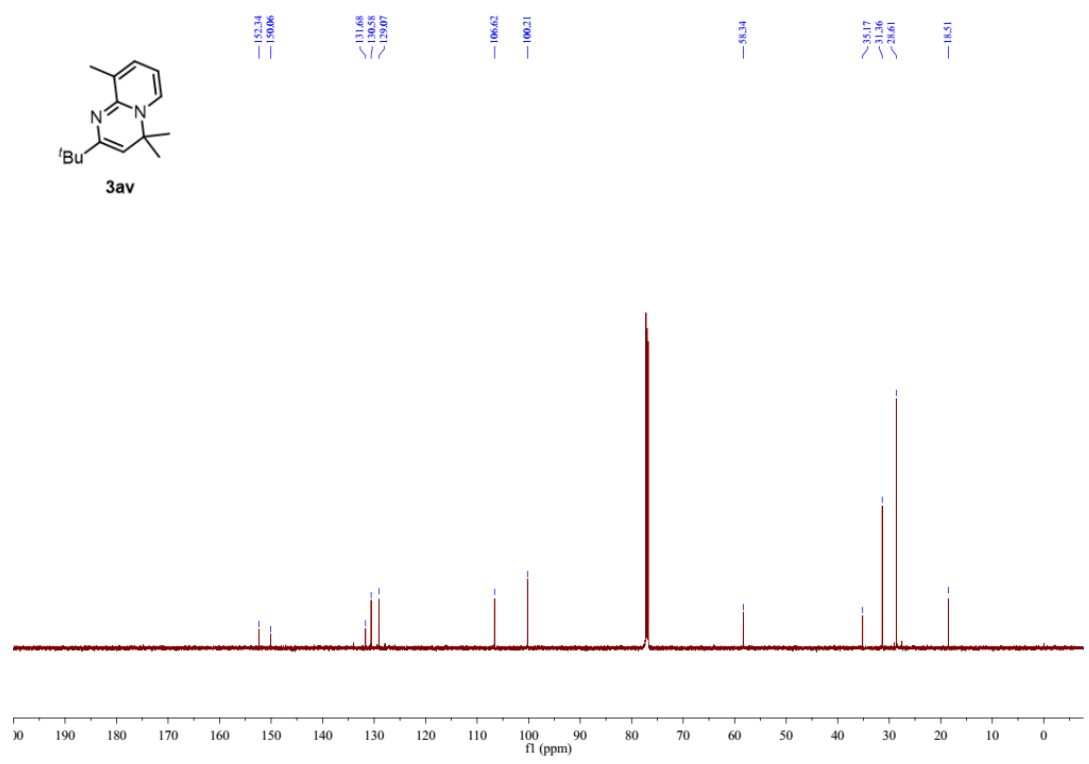

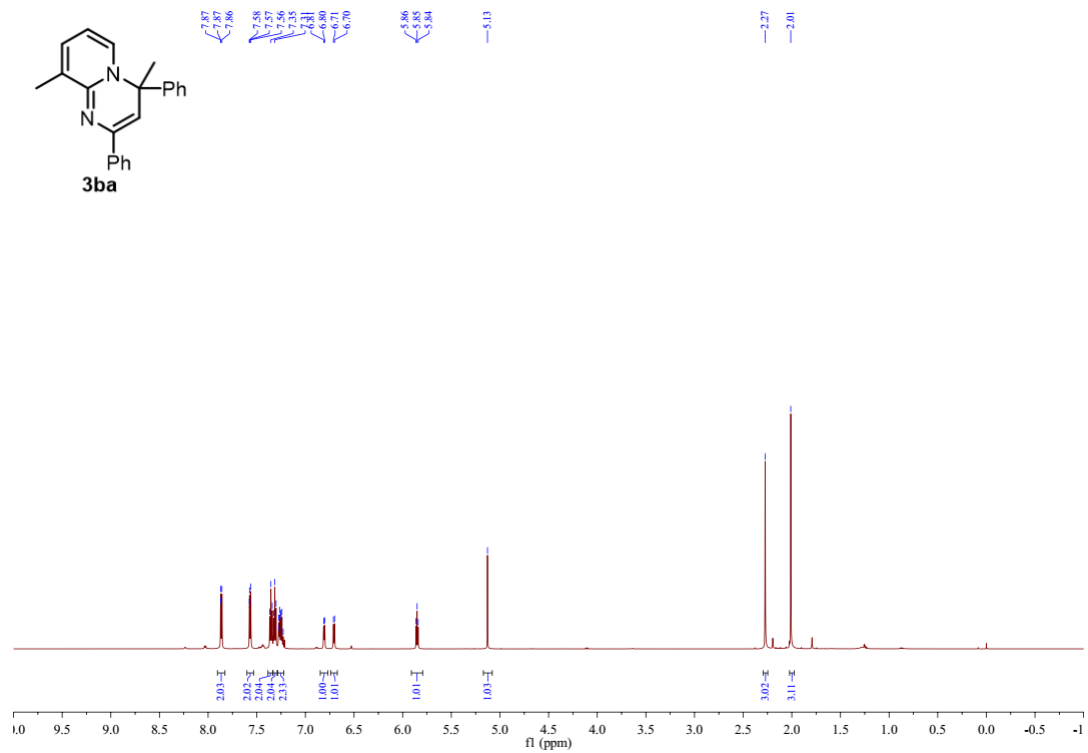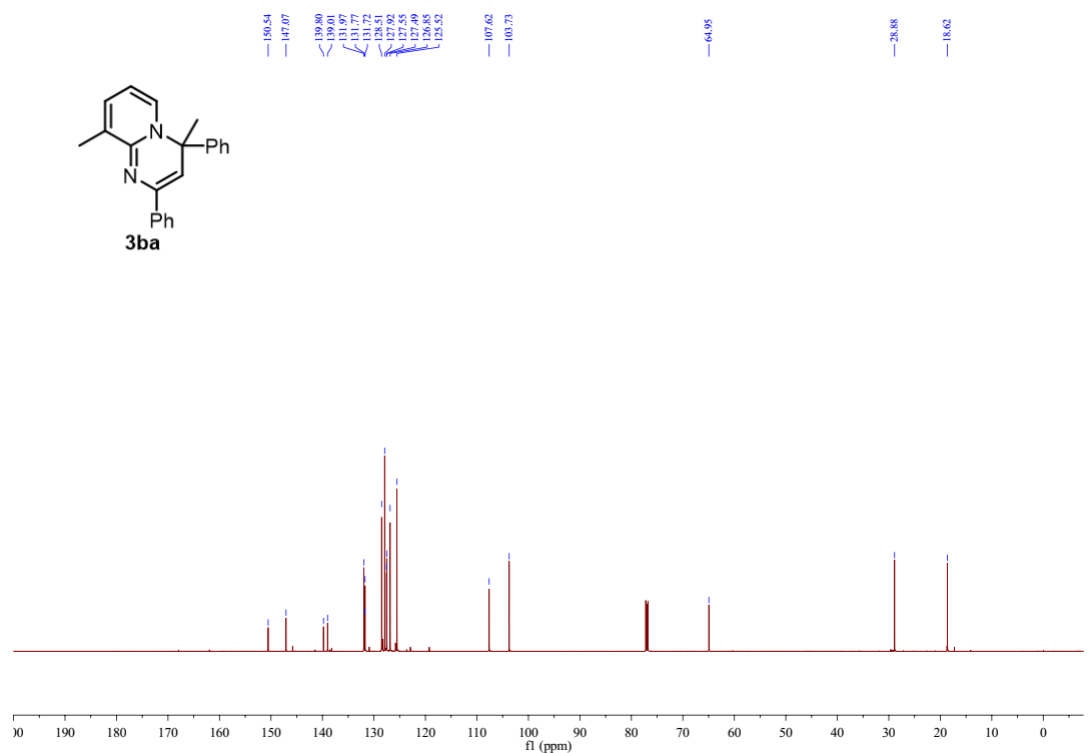

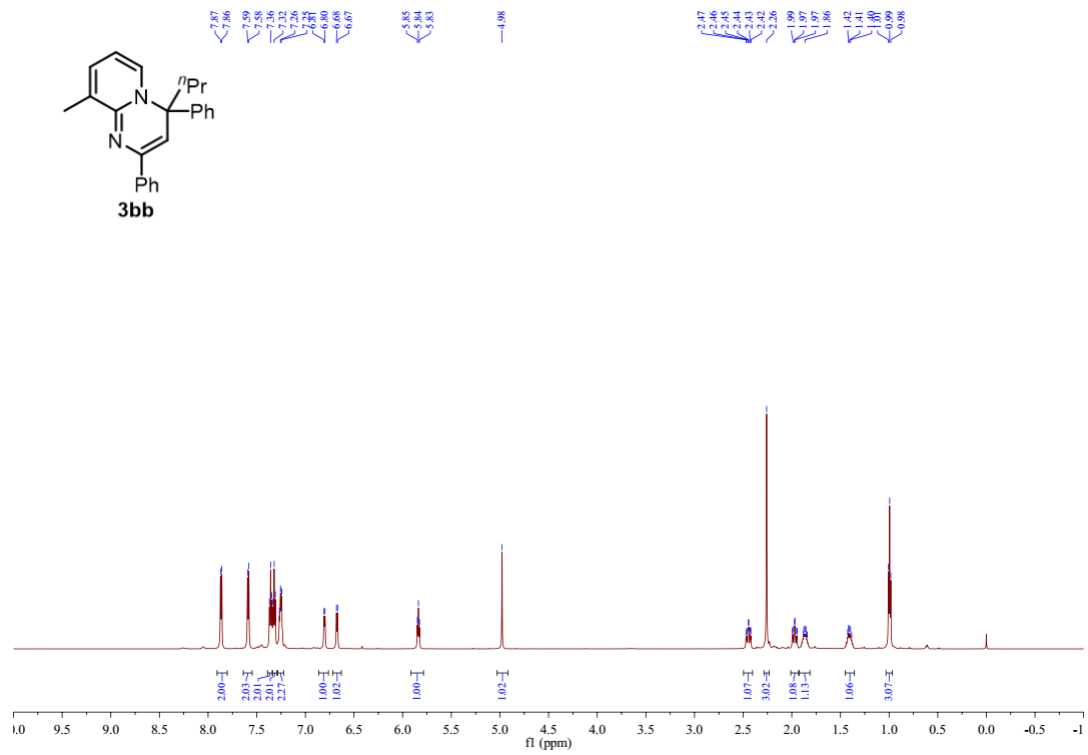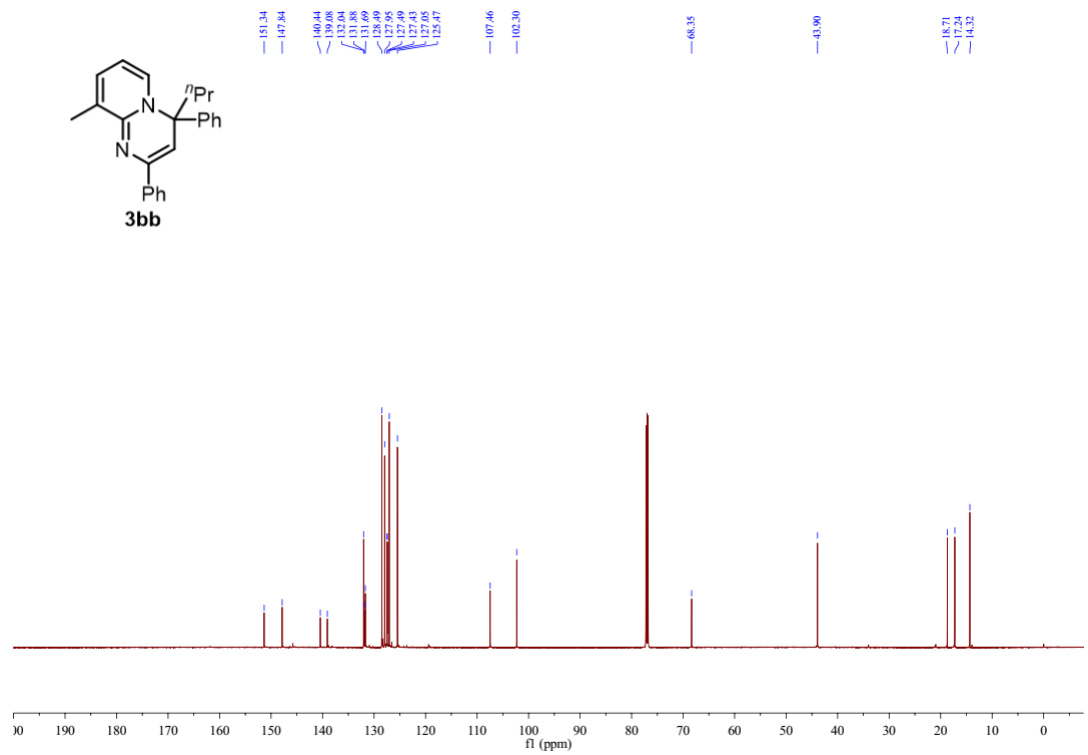



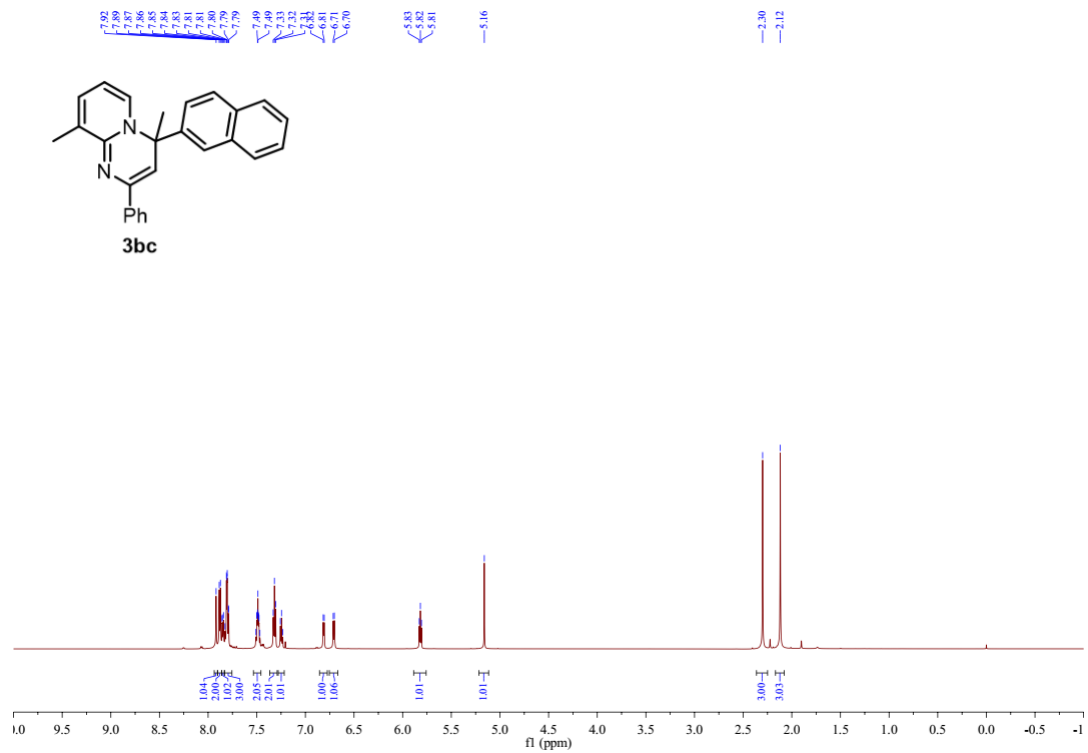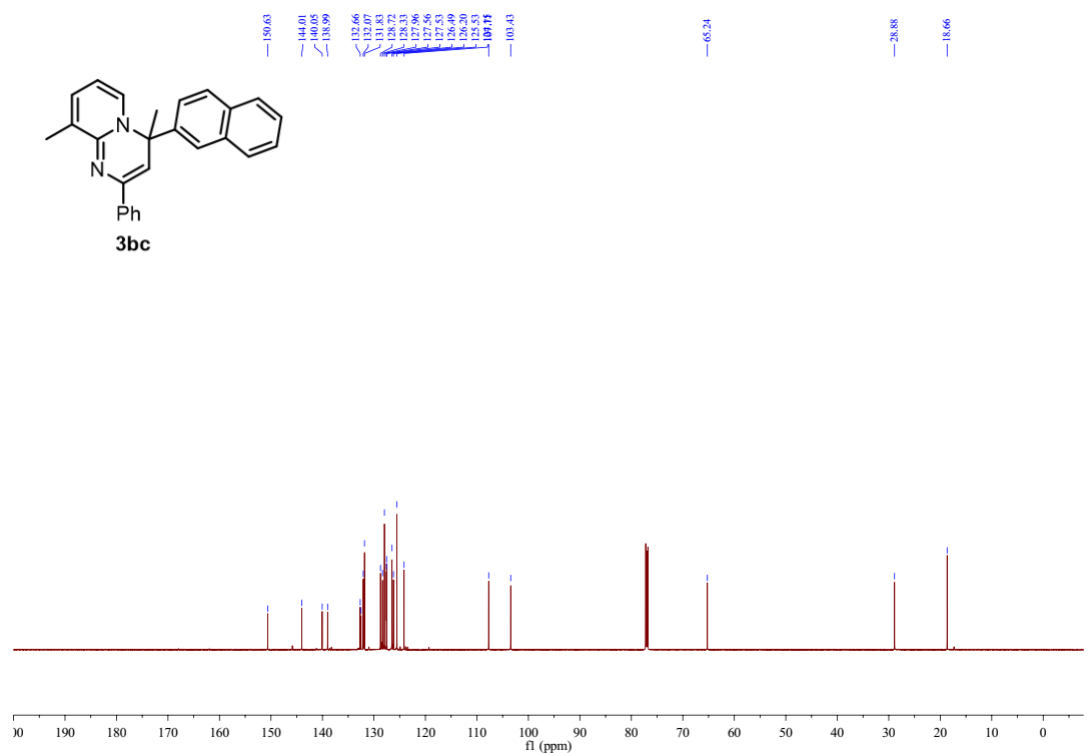

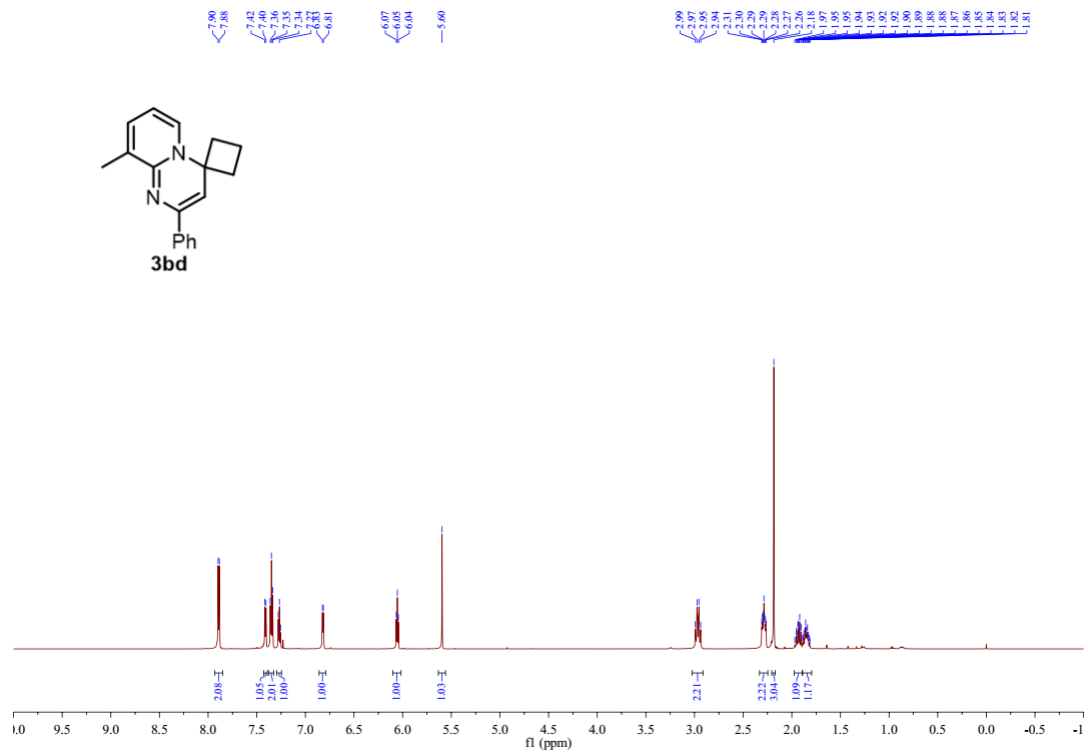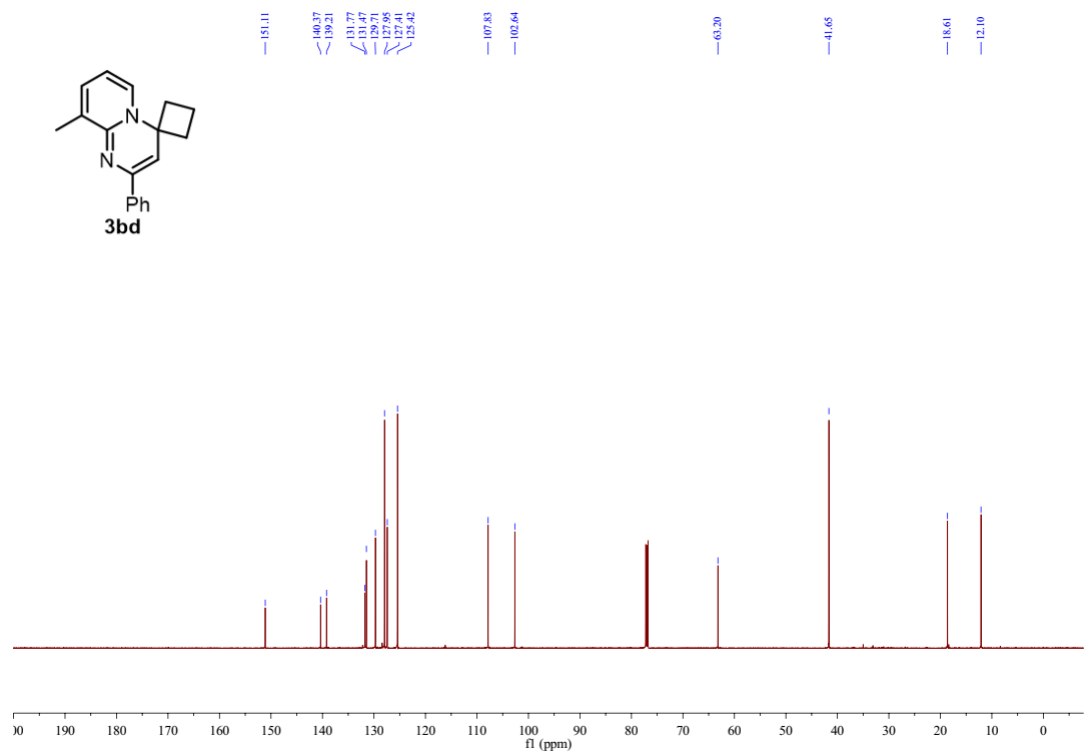

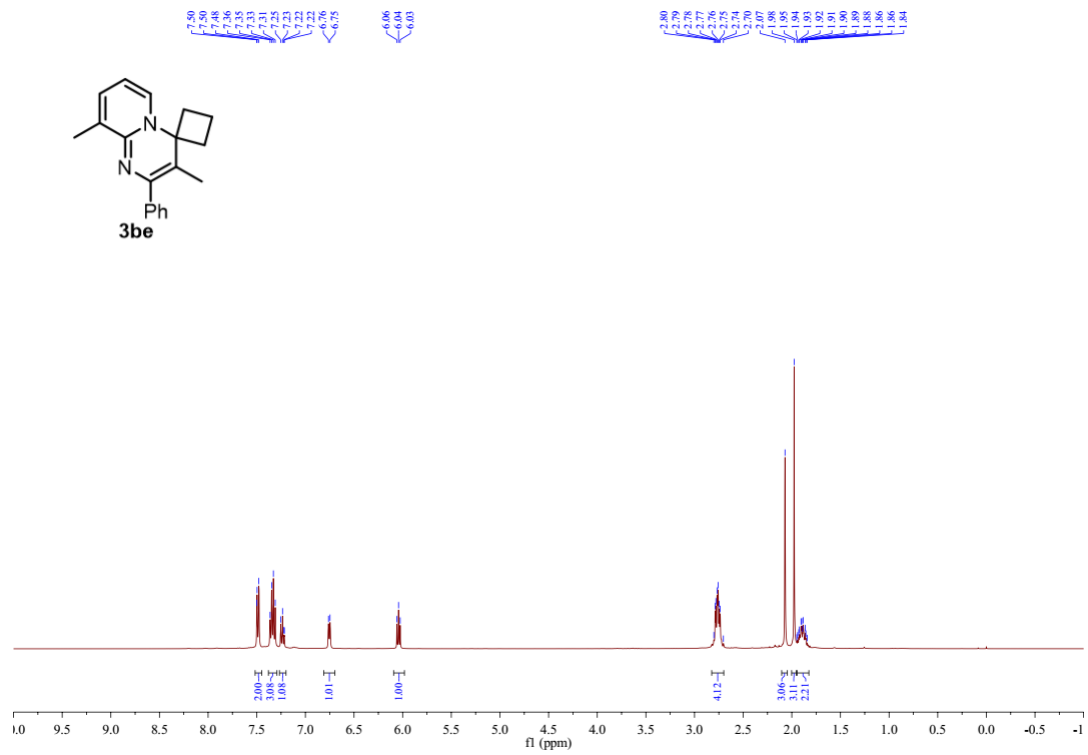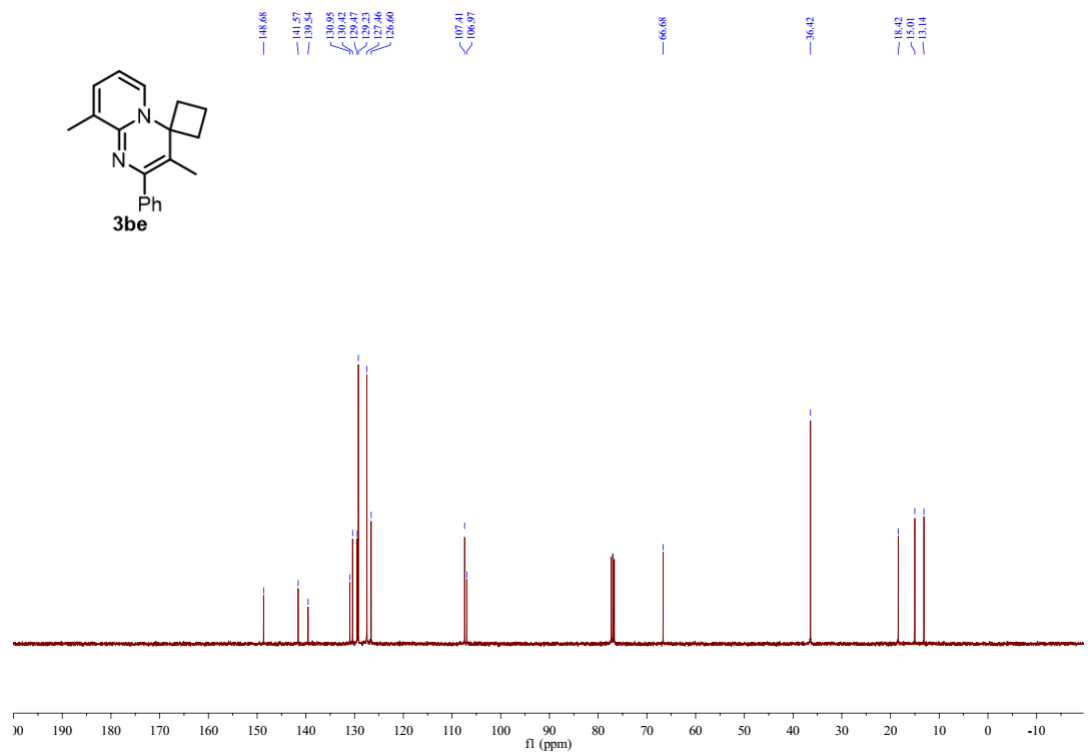

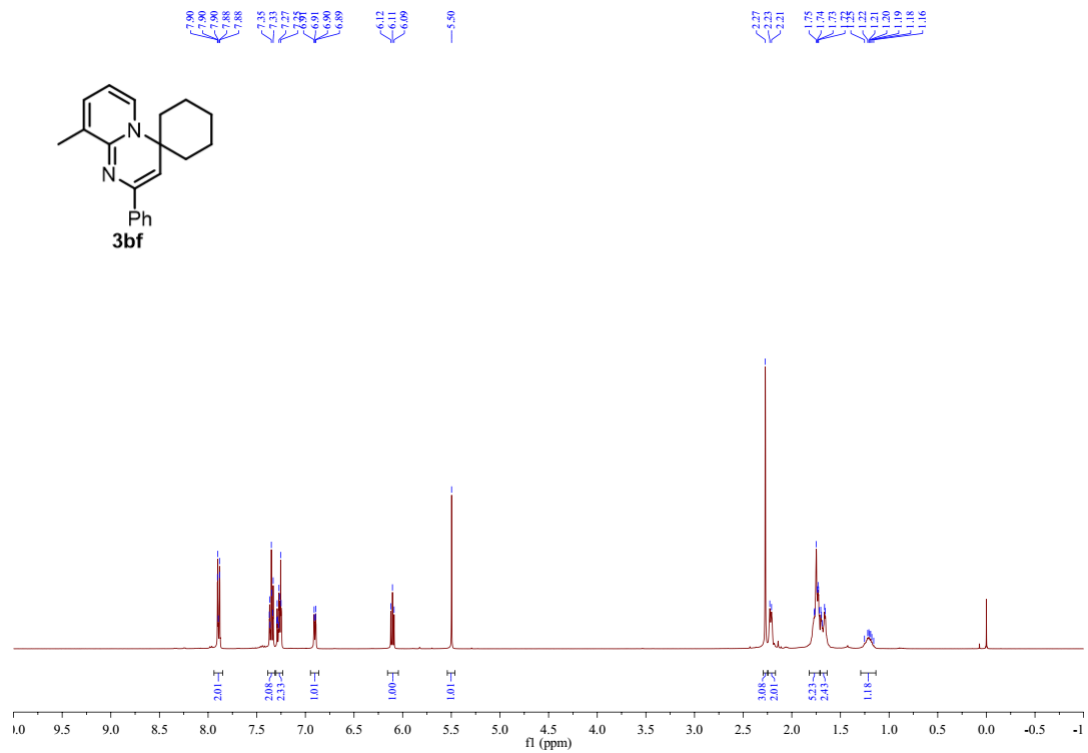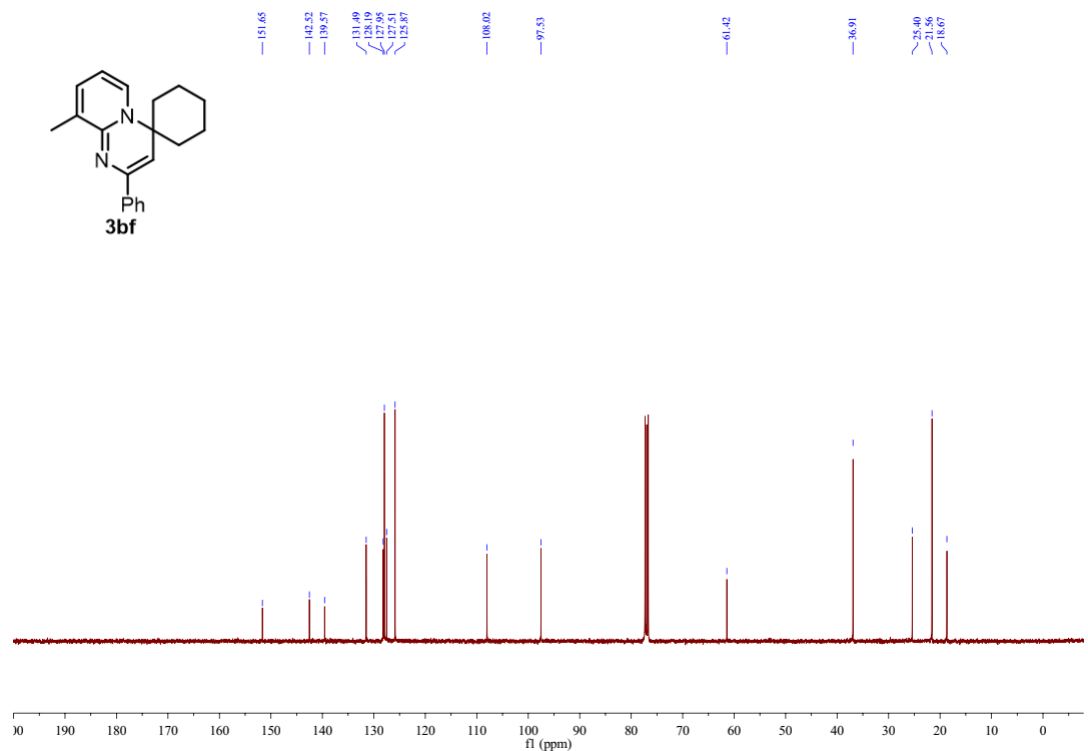

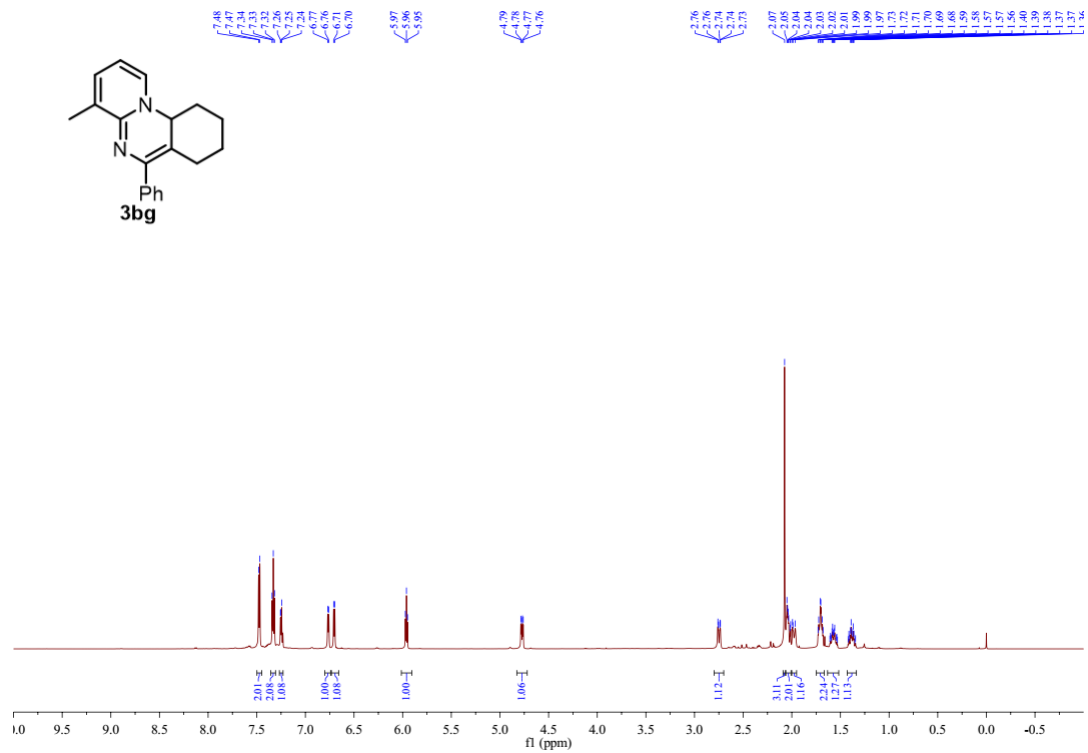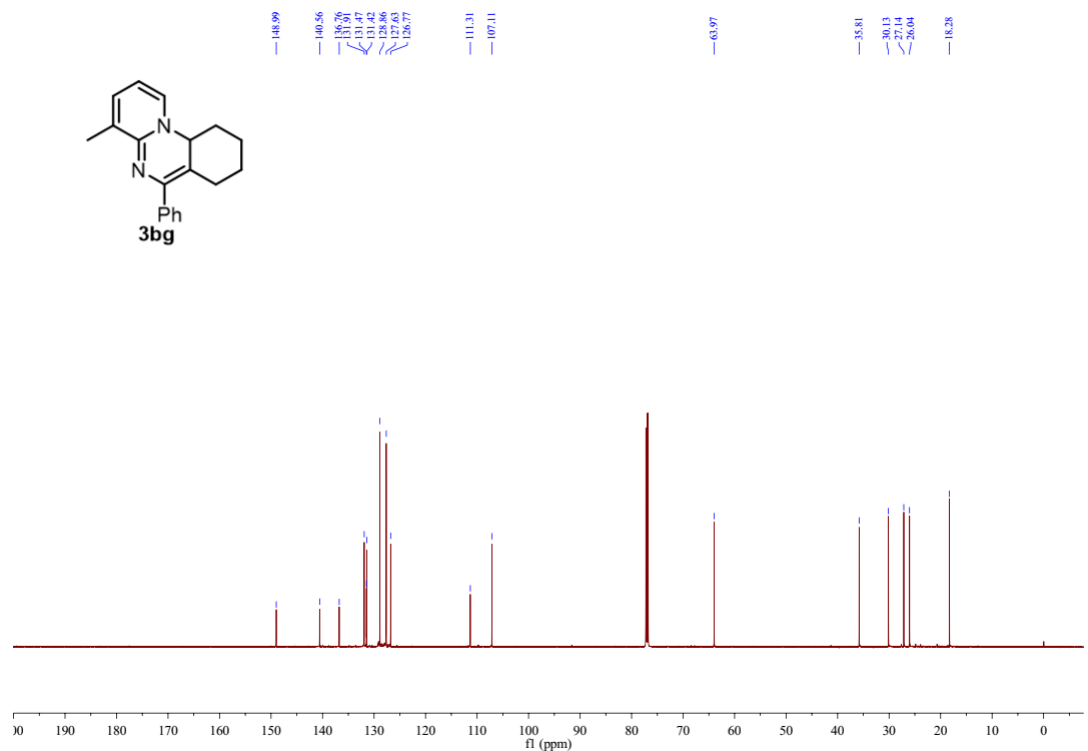

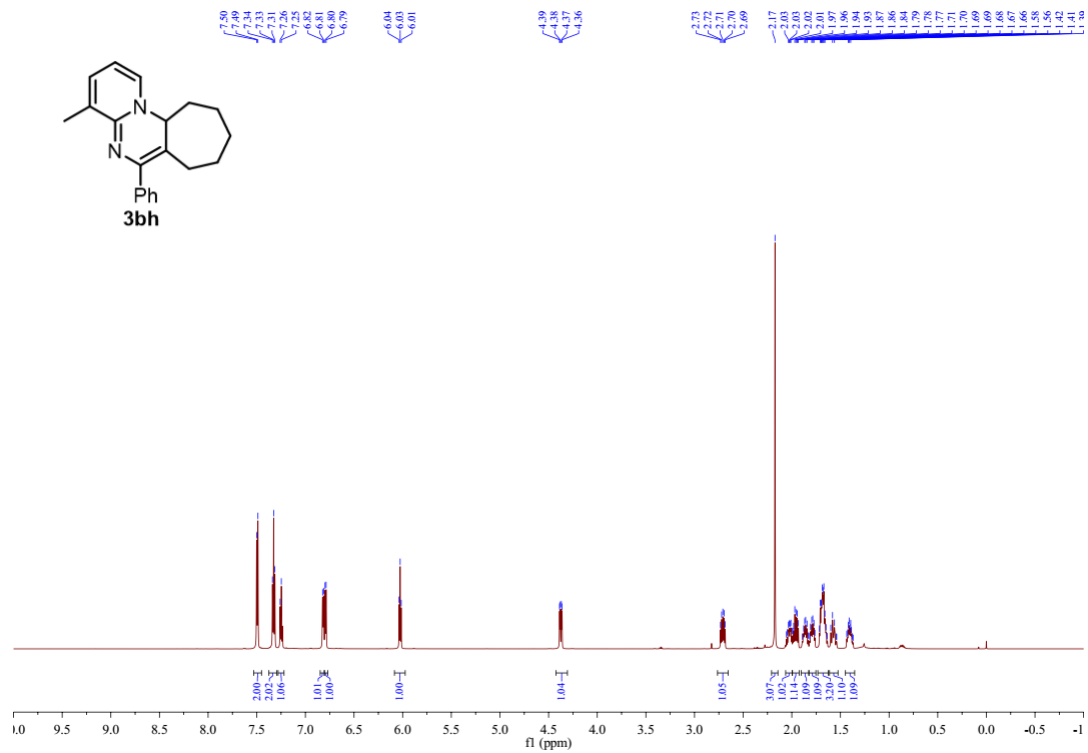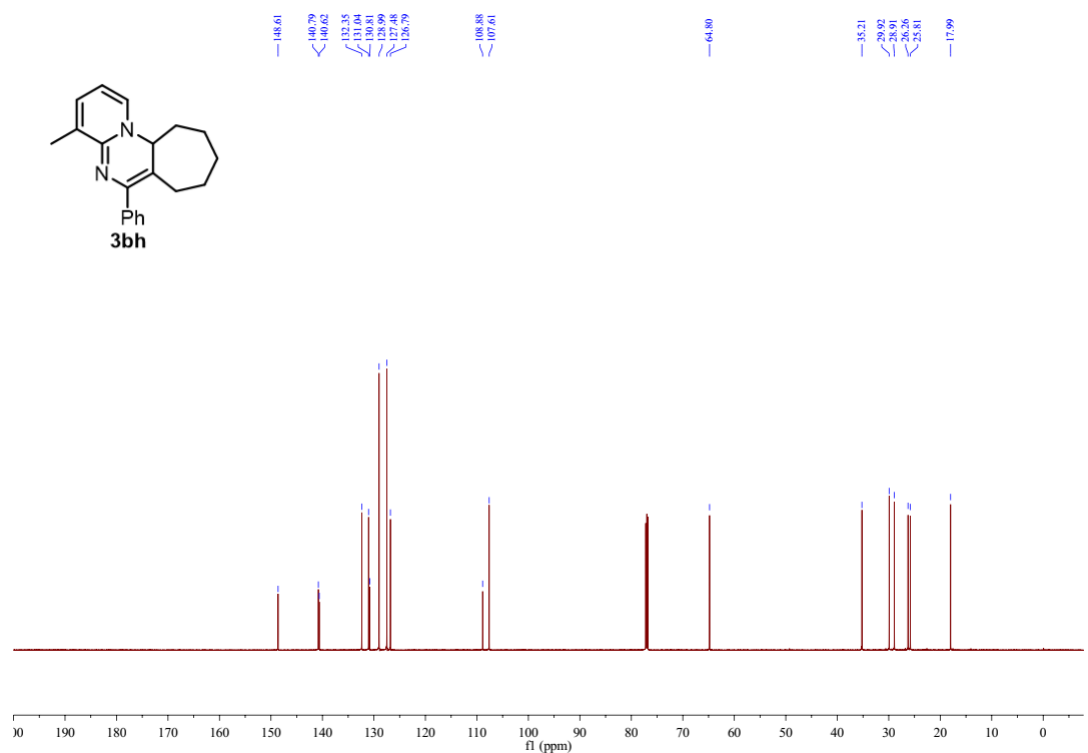



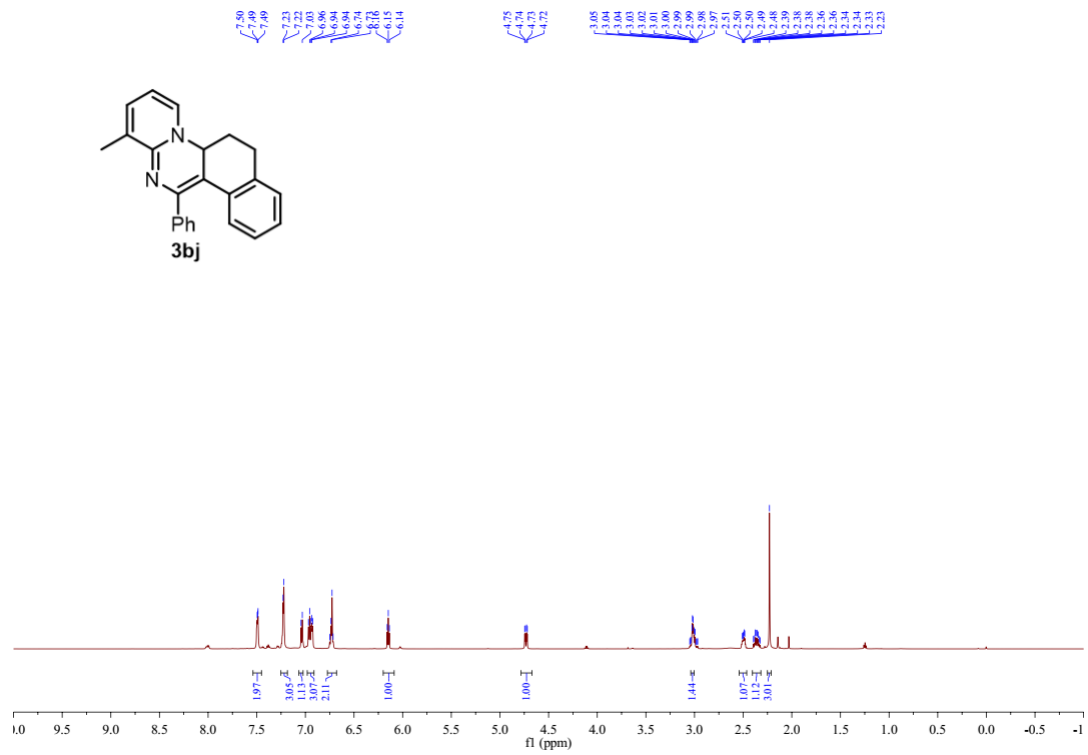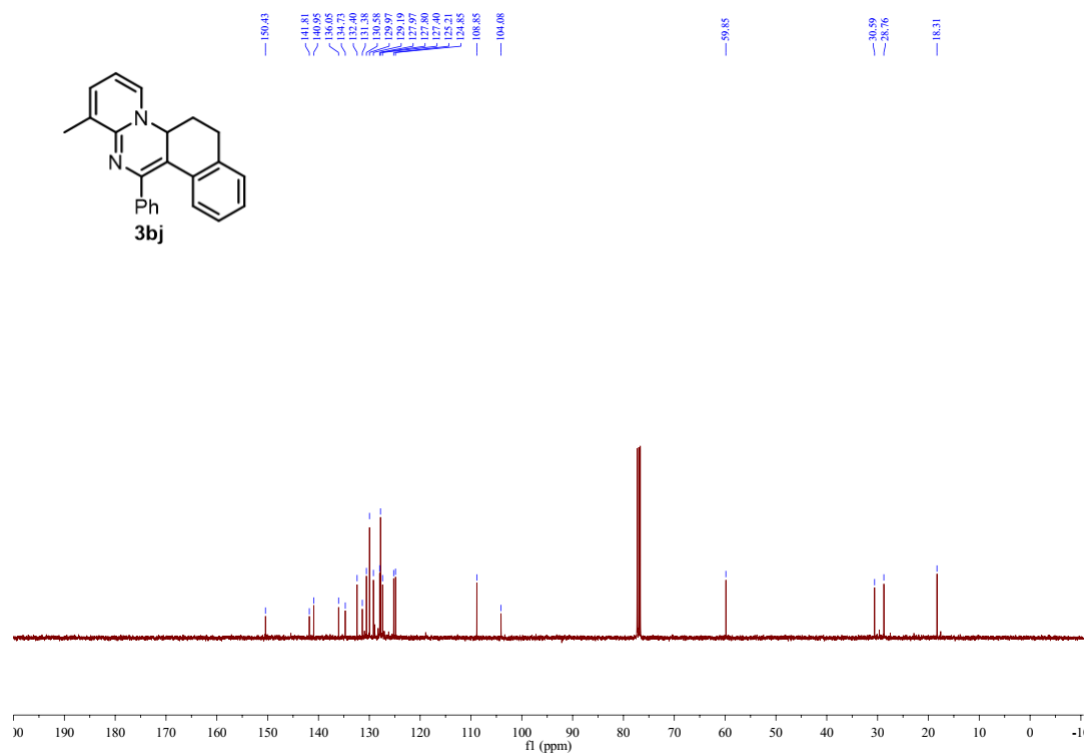



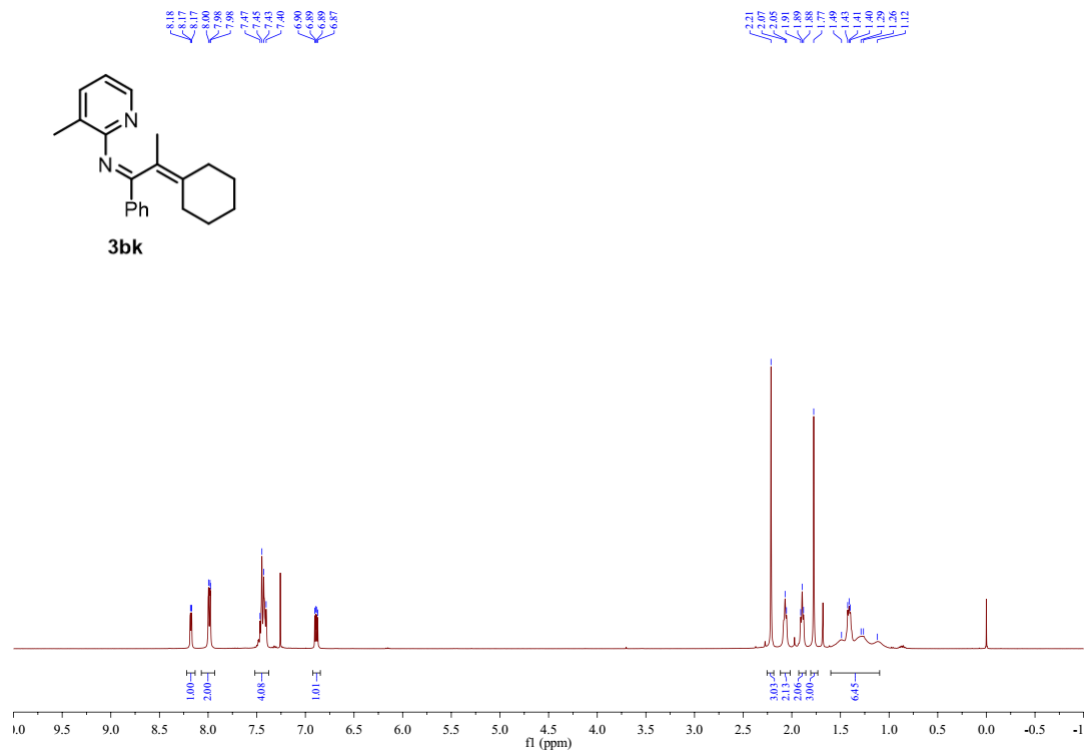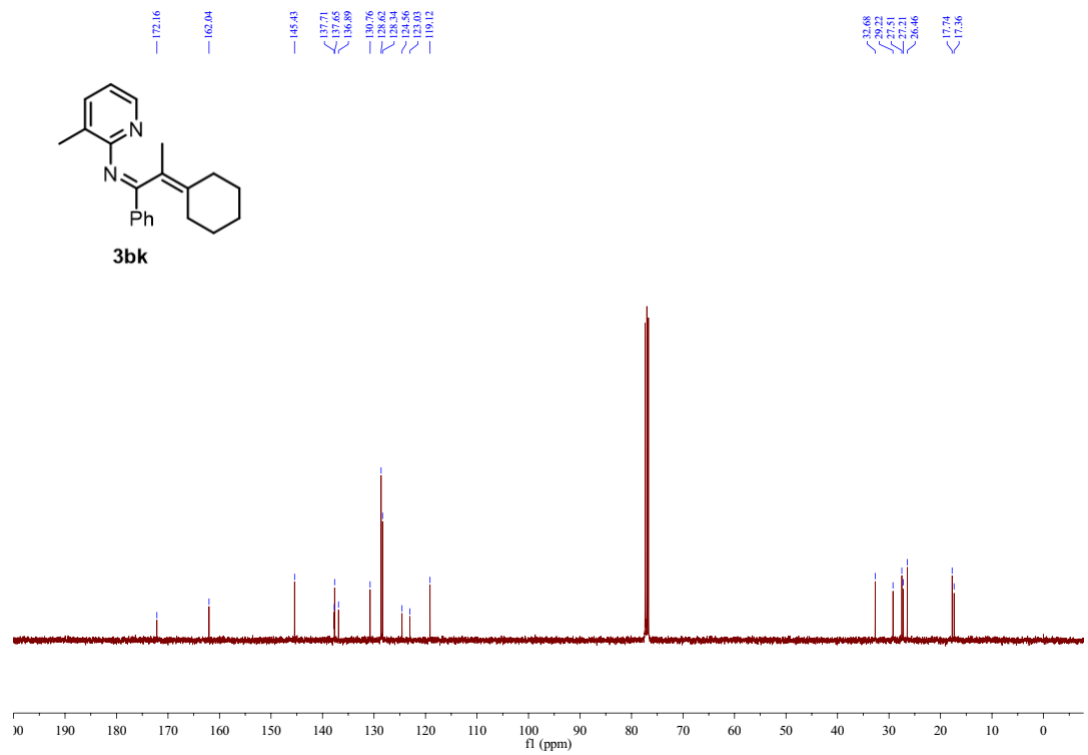

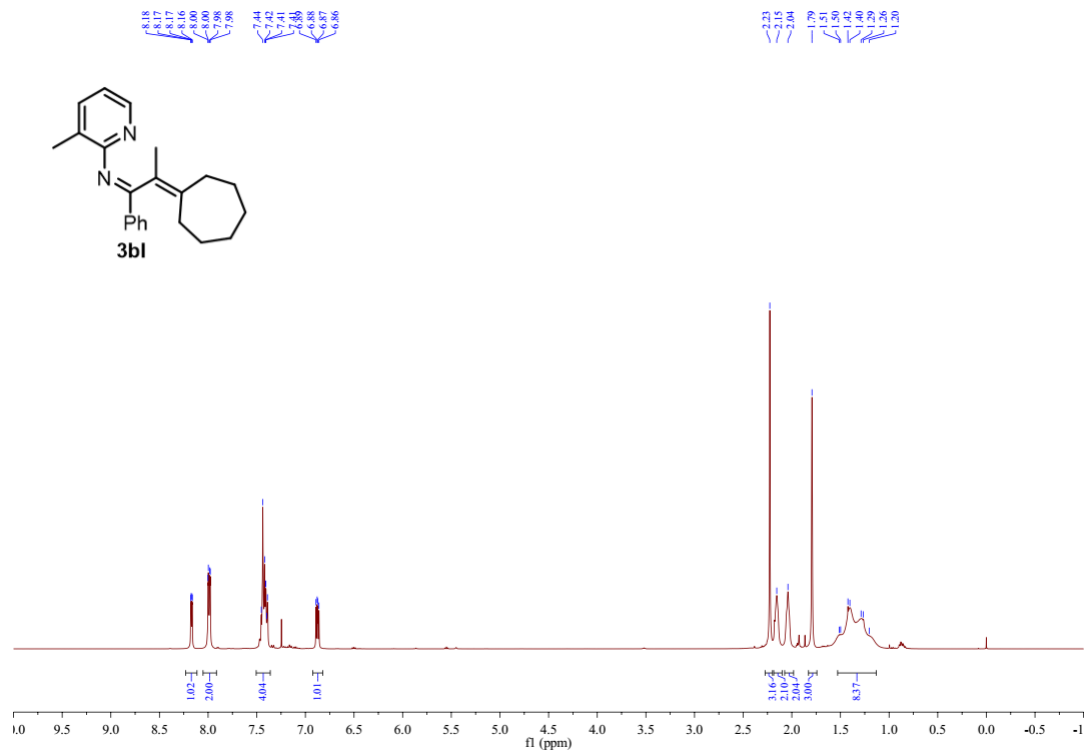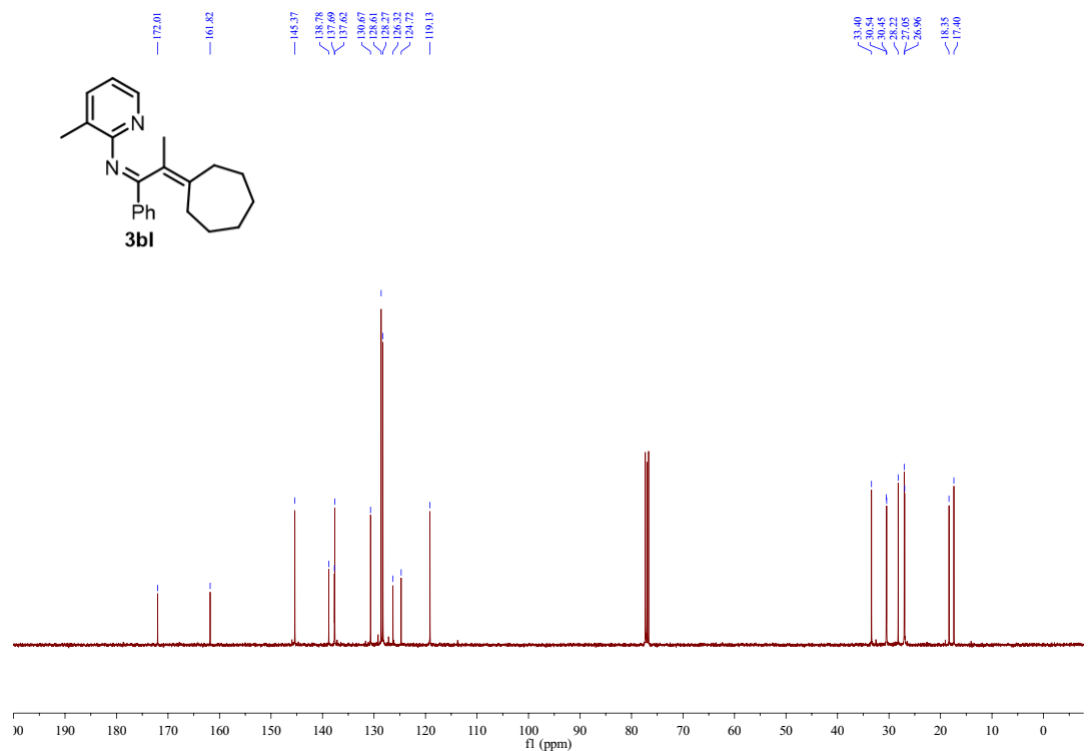

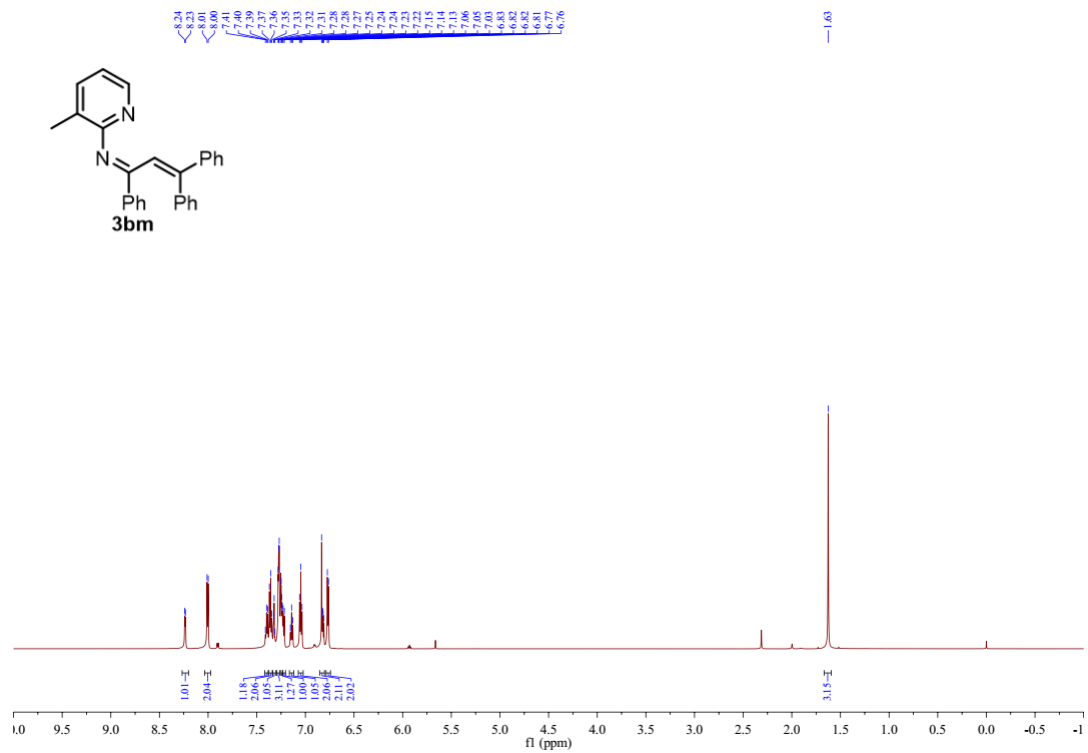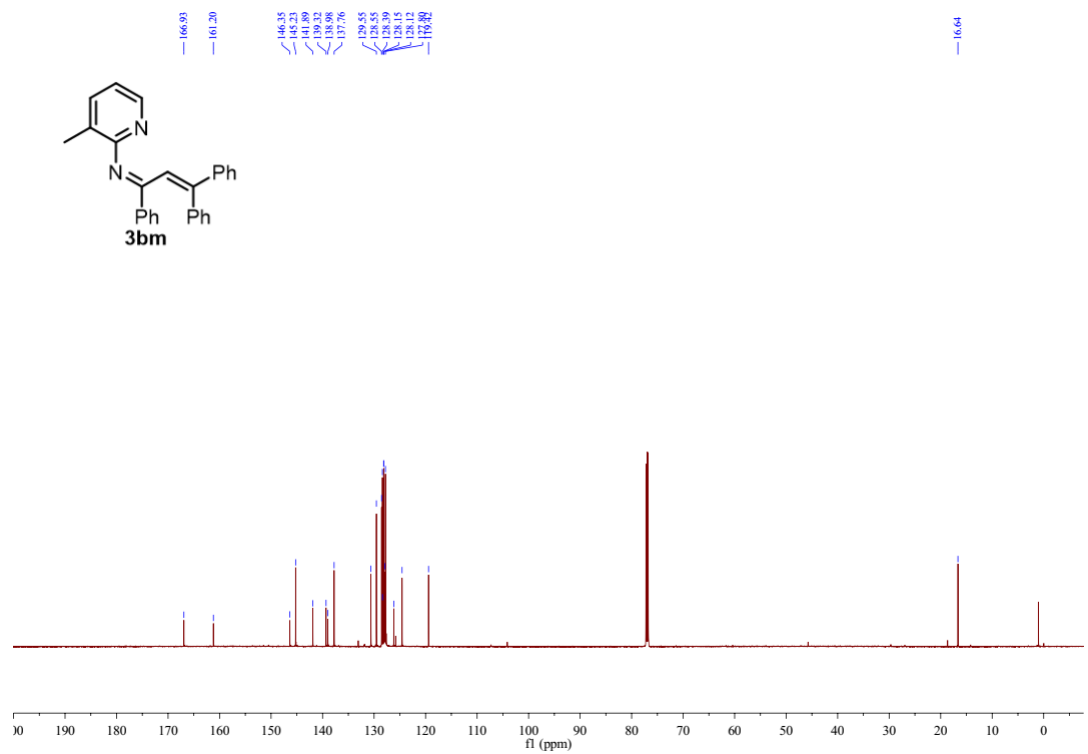

Supplement: d4sc05067c1.pdf [file d4sc05067c1.pdf]
